# Supplementary material for: Direct conversion of carboxylic acids to free thiols via radical relay acridine photocatalysis enabled by N–O bond cleavage
Source: Royal Society of Chemistry journal article supplement (doi:10.1039/d3sc05513b), 2023-12-05

# Supporting Information

## Direct Conversion of Carboxylic Acids to Free Thiols via Radical Relay Acridine Photocatalysis Enabled by N–O Bond Cleavage

Dmitry L. Lipilin, Mikhail O. Zubkov, Mikhail D. Kosobokov, and Alexander D. Dilman\*

N. D. Zelinsky Institute of Organic Chemistry, 119991 Moscow, Leninsky prosp. 47, Russian Federation

E-mail: [adil25@mail.ru](mailto:adil25@mail.ru)

### Table of Contents

|                                                                | Page     |
|----------------------------------------------------------------|----------|
| General Methods                                                | S2       |
| Starting materials                                             | S2–S6    |
| Synthesis of thionocarbonates <b>2</b>                         | S7–S10   |
| Synthesis of thiocarbonates <b>3</b> (General Procedure I)     | S11–S24  |
| Synthesis of thiols <b>4</b> (General Procedure II)            | S25–S27  |
| Synthesis of sulfides <b>5</b> (General Procedure III)         | S28–S30  |
| Synthesis of sulfonamides <b>6</b> (General Procedure IV)      | S31–S32  |
| Synthesis of sulfonyl fluorides <b>7</b> (General Procedure V) | S33–S34  |
| X-ray crystallographic data                                    | S35–S36  |
| DFT calculations                                               | S37–S71  |
| References                                                     | S72–S73  |
| NMR spectra                                                    | S74–S213 |

## General Methods

Precoated silica gel plates F-254 were used for thin-layer analytical chromatography visualizing with UV and/or acidic aq.  $\text{KMnO}_4$  solution. High resolution mass spectra (HRMS) were measured using electrospray ionization (ESI) and time-of-flight (TOF) mass analyzer. The measurements were done in a positive ion mode (interface capillary voltage – 4500 V) or in a negative ion mode (3200 V); mass range from  $m/z$  50 to  $m/z$  3000. For irradiation, a strip of light emitting diodes smd 3528, 50 cm (3528-120LED-1M, 12 V, IP 33; 60W 400 nm) was used. Reactions were performed in a glass tube (outer diameter 12 mm, inner diameter 9 mm). The reaction tube was placed in a glass jacket cooled with water (water temperature *ca.* 20 °C), and the system was wrapped by a strip of LEDs. The distance between the reaction vessel and diodes was about 1 cm.

## Starting materials

All reactions were performed under air atmosphere unless otherwise noted. Acetonitrile, ethylacetate, 1,2-dichloroethane, toluene and dichloromethane were distilled from  $\text{CaH}_2$ . All commercial reagents were used without further purification unless otherwise stated.

Following compounds were prepared according to literature procedures:

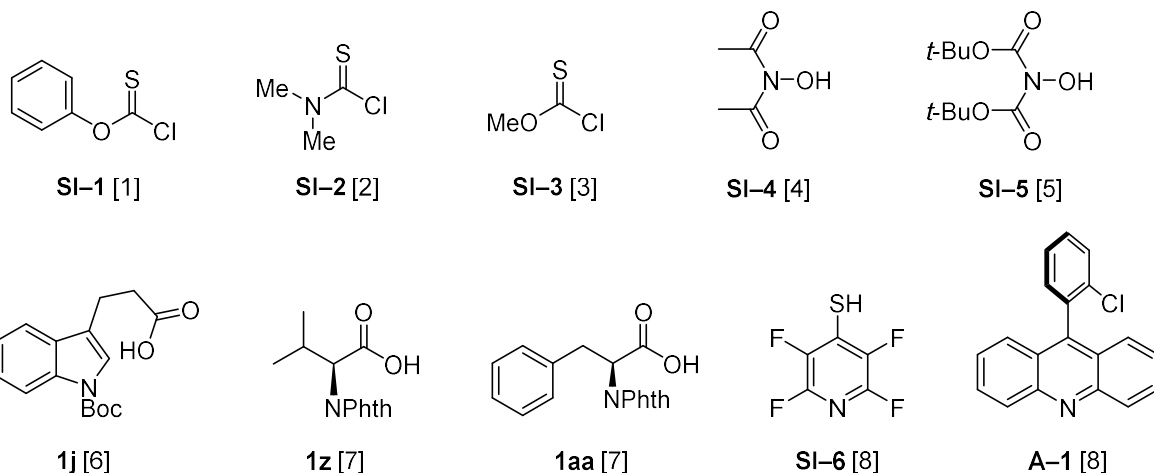

**CAUTION:** due to the toxicity and volatility of thiophosgene (b.p. 72 °C), it should only be handled with adequate ventilation (preparation of compounds SI-1, SI-2, SI-3).

### 1-(2-Methylbenzoyl)piperidine-4-carboxylic acid (**1e**).

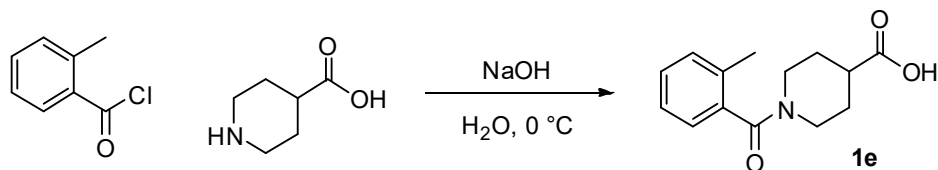

2-Methylbenzoyl chloride (1 equiv, 20 mmol, 3.08 g, 2.85 mL) and a solution of NaOH (1 equiv, 20 mmol, 0.8 g) in water (10 mL) were added dropwise simultaneously from two different dropping funnels into a three-necked 100 mL flask containing a solution of piperidine-4-carboxylic acid (1 equiv, 20 mmol, 2.58 g) and NaOH (1 equiv, 20 mmol, 0.8 g) in water (20 mL) at 0 °C (ice bath). The cooling bath was removed, and mixture was stirred for 1 hour at room temperature. The mixture was cooled to 0 °C, acidified with 2M aq. HCl to pH = 4 and extracted with EtOAc (4×30 mL). The combined organic layers were washed with water (10 mL), brine (10 mL), filtered through Na<sub>2</sub>SO<sub>4</sub>, concentrated under reduced pressure, and the residue was recrystallised from ethyl acetate.

Yield 4.11 g, 83%. Colorless solid. Mp 164-166 °C.

<sup>1</sup>H NMR (300 MHz, DMSO-*d*<sub>6</sub>), δ: 7.43 – 7.02 (m, 4H), 4.53 – 4.30 (m, 1H), 3.41 – 3.17 (m, 2H), 3.13 – 2.82 (m, 2H), 2.20 (s, 3H), 2.02 – 1.86 (m, 1H), 1.82 – 1.65 (m, 1H), 1.61 – 1.32 (m, 2H).

<sup>13</sup>C {<sup>1</sup>H} NMR (75 MHz, DMSO-*d*<sub>6</sub>), δ: 176.0, 168.9, 137.1, 133.9, 130.6, 128.9, 126.3, 125.9, 45.9, 40.5, 28.9, 28.2, 19.0.

HRMS (ESI): calcd for C<sub>14</sub>H<sub>18</sub>NO<sub>3</sub> (M+H) 248.1281, found 248.1277, for C<sub>14</sub>H<sub>17</sub>NO<sub>3</sub>Na (M+Na) 270.1101, found 270.1097, for C<sub>14</sub>H<sub>17</sub>NO<sub>3</sub>K (M+K) 286.0840, found 286.0837.

### 2-(2,3,5,6-Tetrafluoropyridin-4-ylsulfanyl)propionic acid (**1q**).

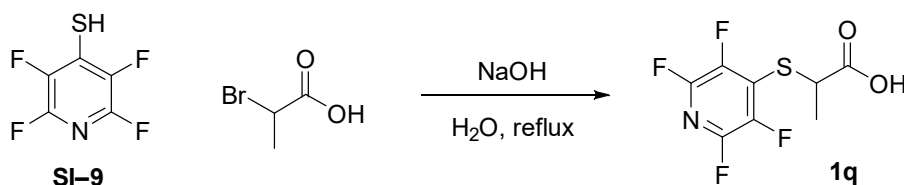

2-Bromopropionic acid (1.1 equiv, 22 mmol, 3.34 g) was added into a 50 mL flask containing a solution of 2,3,5,6-tetrafluoro-pyridine-4-thiol **SI-6** (1 equiv, 20 mmol, 3.64 g) and NaOH (2.1 equiv, 42 mmol, 1.68 g) in water (25 mL) at room temperature, and the mixture was stirred for 5 hours at 90 °C (water bath). The mixture was cooled to 0 °C, acidified with 2M aq. HCl to pH = 4. The precipitate was filtered off, washed with water and air dried, and then recrystallized from ethanol.

Yield 4.69 g, 92%. Colorless solid. Mp 77-79 °C.

$^1\text{H}$  NMR (300 MHz, DMSO- $d_6$ ),  $\delta$ : 4.27 (q,  $J = 7.2$  Hz, 1H), 1.46 (d,  $J = 7.2$  Hz, 3H).

$^{19}\text{F}$  NMR (282 MHz, DMSO- $d_6$ ),  $\delta$ : -92.9 – -93.6 (m, 2F), -136.8 – -137.3 (m, 2F).

$^{13}\text{C}\{^1\text{H}\}$  NMR (75 MHz, DMSO- $d_6$ ),  $\delta$ : 172.2, 143.2 (dm,  $J = 242.8$  Hz), 141.6 (dd,  $J = 253.9$  Hz,  $J = 19$  Hz), 129.2 (m), 44.7, (t,  $J = 3.3$  Hz), 18.1.

HRMS (ESI): calcd for  $\text{C}_8\text{H}_5\text{F}_4\text{NO}_2\text{SNa}$  (M+Na) 277.9869, found 277.9860.

### Ethyl 2-(1*H*-pyrazol-1-yl)propanoate (SI-7).

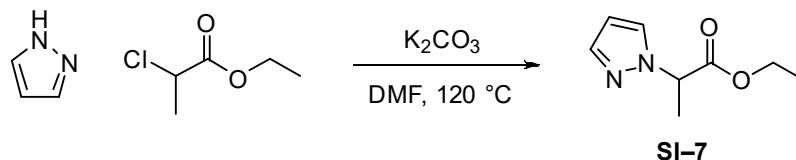

Ethyl 2-chloropropanoate (1.1 equiv, 55 mmol, 7.5 g, 7 mL) was added into a 100 mL flask containing a solution of pyrazole (1 equiv, 50 mmol, 3.4 g) in DMF (35 mL) at room temperature. Then, solid  $\text{K}_2\text{CO}_3$  (1.1 equiv, 55 mmol, 7.6 g) was added and the mixture was stirred for 5 hours at 120-130 °C (oil bath). The mixture was cooled to room temperature, concentrated under reduced pressure, diluted with water (20 mL) and extracted with EtOAc (4×25 mL). The combined organic layers were washed with brine (2×25 mL), filtered through  $\text{Na}_2\text{SO}_4$ , concentrated under reduced pressure, and the residue was purified by column chromatography on silica gel (EtOAc/ $\text{CH}_2\text{Cl}_2$  1/5).

Yield 6.13 g, 73%. Colorless oil.

Chromatography: EtOAc/ $\text{CH}_2\text{Cl}_2$  1/5.  $R_f$  0.75.

$^1\text{H}$  NMR (300 MHz, DMSO- $d_6$ ),  $\delta$ : 7.81 (d,  $J = 1.9$  Hz, 1H), 7.48 (d,  $J = 1.4$  Hz, 1H), 6.32 – 6.24 (m, 1H), 5.25 (q,  $J = 7.2$  Hz, 1H), 4.11 (q,  $J = 7.1$  Hz, 2H), 1.67 (d,  $J = 7.2$  Hz, 3H), 1.15 (t,  $J = 7$  Hz, 3H).

$^{13}\text{C}\{^1\text{H}\}$  NMR (75 MHz, DMSO- $d_6$ ),  $\delta$ : 170.7, 139.3, 129.9, 105.7, 61.5, 59.0, 17.4, 14.3.

HRMS (ESI): calcd for  $\text{C}_8\text{H}_{12}\text{N}_2\text{O}_2\text{Na}$  (M+Na) 191.0791, found 191.0789,  $\text{C}_8\text{H}_{12}\text{N}_2\text{O}_2\text{K}$  (M+K) 207.0530, found 207.0528.

### 2-Pyrazol-1-yl-propionic acid (1t).

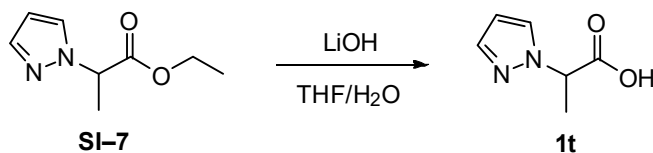

A solution of lithium hydroxide (2.5 equiv, 25 mmol, 600 mg) in water (10 mL) was added into a 50 mL flask containing a solution of ethyl 2-pyrazol-1-yl-propionate **SI-7** (1 equiv, 10 mmol, 1.68 g) in THF (15 mL) at room temperature. The mixture was stirred at room temperature for 4

hours, acidified with 1M aq. HCl to pH = 4 and extracted with EtOAc (5×25 mL). The combined organic layers were filtered through Na<sub>2</sub>SO<sub>4</sub>, concentrated under reduced pressure, and the residue was recrystallized from ethyl acetate.

Yield 1.30 g, 93%. Colorless solid. Mp 89-91 °C.

<sup>1</sup>H NMR (300 MHz, DMSO-*d*<sub>6</sub>), δ: 7.78 (s, 1H), 7.45 (s, 1H), 6.26 (s, 1H), 5.13 (q, *J* = 6.5 Hz, 1H), 1.66 (d, *J* = 6.5 Hz, 3H).

<sup>13</sup>C {<sup>1</sup>H} NMR (75 MHz, DMSO-*d*<sub>6</sub>), δ: 172.4, 139.1, 129.9, 105.6, 59.1, 17.6.

HRMS (ESI): calcd for C<sub>6</sub>H<sub>8</sub>N<sub>2</sub>O<sub>2</sub>Na (M+Na) 163.0478, found 163.0473.

### 2-(2,2-Difluoro-1-methylcyclopropyl)acetic acid (10).

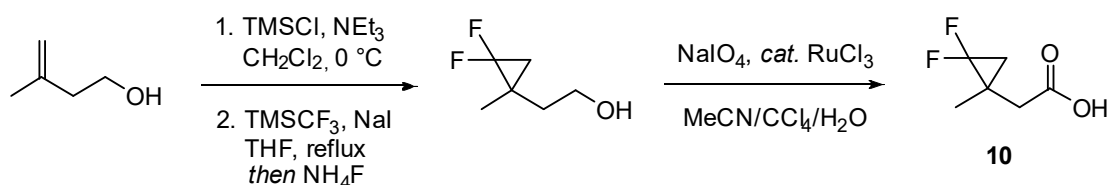

Under argon atmosphere, trimethylsilyl chloride (1.1 equiv, 22 mmol, 2.4 g) was added dropwise into a 50 mL flask containing a solution of 3-methylbut-3-en-1-ol (1 equiv, 20 mmol, 1.72 g) and triethylamine (1.1 equiv, 22 mmol, 3.07 mL) in dichloromethane (20 mL) at 0 °C (ice bath), the cooling bath was removed, and the mixture was stirred for 15 min at room temperature. The solvent was removed from the reaction mixture under reduced pressure, the residue was diluted with water (50 mL), slightly acidified with 1M aq. HCl to pH = 6 and extracted with hexane (3×20 mL). The combined organic layers were filtered through Na<sub>2</sub>SO<sub>4</sub> and concentrated under reduced pressure. The resulting alkene was introduced into the next reaction without further purification.

Under argon atmosphere, a 100 mL flask equipped with magnetic stirring bar and condenser was charged with trimethyl((3-methylbut-3-en-1-yl)oxy)silane (1 equiv, 19 mmol, 3.0 g), sodium iodide (0.45 equiv, 8.55 mmol, 1.28 g) and THF (25 mL). The flask was heated to reflux, and TMSCF<sub>3</sub> (3.0 equiv, 57 mmol, 8.42 mL) was added dropwise over 30 min, while maintaining the reflux. The mixture was refluxed for another 6 hours, and then cooled to room temperature. The mixture was diluted with water (40 mL), extracted with dichloromethane (3×40 mL) and concentrated under reduced pressure. The residue was diluted with methanol (50 mL), and ammonium fluoride (2.5 equiv, 47.5 mmol, 1.76 g) was added. The mixture was stirred overnight at room temperature, then diluted with water (80 mL) and extracted with dichloromethane (3×50 mL). The combined organic layers were filtered through Na<sub>2</sub>SO<sub>4</sub> and

concentrated under reduced pressure. The resulting alcohol was introduced into the next reaction without further purification.

A 100 mL flask equipped with magnetic stirring bar and condenser was charged with 2-(2,2-difluoro-1-methylcyclopropyl)ethan-1-ol (1 equiv, 14.4 mmol, 1.96 g), sodium periodate (2.5 equiv, 36 mmol, 7.7 g), ruthenium (III) chloride (1 mol.%, 32 mg), acetonitrile (7 mL), carbon tetrachloride (7 mL) and water (14 mL). The mixture was stirred overnight at room temperature, then diluted with water (100 mL) and extracted with dichloromethane (3×50 mL). The combined organic layers were treated with 0.5M aqueous sodium hydroxide (200 mL) in a separatory funnel, and the mixture was stirred vigorously. The aqueous layer was separated and extracted with dichloromethane (2×50 mL). The aqueous layer was acidified with 1M aq. HCl to pH = 3 and extracted with dichloromethane (3×50 mL). The combined organic layers were filtered through Na<sub>2</sub>SO<sub>4</sub> and concentrated under reduced pressure.

Yield 1.51 g, 50% (3 steps). Colorless solid. Mp 49-52 °C.

<sup>1</sup>H NMR (300 MHz, CDCl<sub>3</sub>), δ: 12.0 – 10.0 (br s, 1H), 2.57 (dt, *J* = 16.9, 1.8 Hz, 1H), 2.49 (d, *J* = 16.9 Hz, 1H), 1.31 (dd, *J* = 2.8, 1.7 Hz, 3H), 1.30 – 1.11 (m, 2H).

<sup>19</sup>F NMR (282 MHz, CDCl<sub>3</sub>), δ: -137.82 (dd, *J* = 154.6, 12.9 Hz, 1F), -140.27 (dd, *J* = 154.6, 12.4 Hz, 1F).

<sup>13</sup>C{<sup>1</sup>H} NMR (75 MHz, CDCl<sub>3</sub>), δ: 177.7, 115.2 (dd, *J* = 289.0, 287.3 Hz), 37.5 (dd, *J* = 6.5, 1.3 Hz), 22.9 (dd, *J* = 11.3, 9.5 Hz), 22.31 (t, *J* = 10.2 Hz), 16.83 (dd, *J* = 6.3, 1.4 Hz).

HRMS (ESI): calcd for C<sub>6</sub>H<sub>8</sub>F<sub>2</sub>O<sub>2</sub>Na (M+Na) 133.0385, found 133.0378.

## Synthesis of thionarbonates 2

### Phthalimido phenyl thionarbonate (2a). [9]

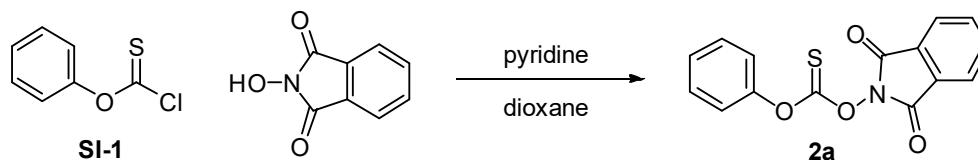

Carbonylthiochloride **SI-1** (1.1 equiv, 55 mmol, 9.5 g) was added dropwise into a 200 mL flask containing a solution of *N*-hydroxyphthalimide (1 equiv, 50 mmol, 8.2 g) and pyridine (1.25 equiv, 62.5 mmol, 5.5 mL) in dry dioxane (70 mL) at 0 °C (ice bath). The mixture was stirred for 2 hours at room temperature, then poured into ice water. The precipitate was filtered off and recrystallized from ethanol.

Yield 14.1 g (94%). Colorless crystals. Mp 108-110 °C.

<sup>1</sup>H NMR (300 MHz, CDCl<sub>3</sub>), δ: 7.97 – 7.94 (m, 2H), 7.86 – 7.83 (m, 2H), 7.51 – 7.46 (m, 2H), 7.39 – 7.34 (m, 1H), 7.30 – 7.27 (m, 2H).

<sup>13</sup>C{<sup>1</sup>H} NMR (75 MHz, CDCl<sub>3</sub>), δ: 191.7, 160.9, 154.0, 135.0, 129.9, 128.7, 127.4, 124.2, 121.1.

HRMS (ESI): calcd for C<sub>15</sub>H<sub>10</sub>NO<sub>4</sub>S (M+H) 300.0325; found 300.0315, calcd for C<sub>15</sub>H<sub>13</sub>N<sub>2</sub>O<sub>4</sub>S (M+NH<sub>4</sub>) 317.0580; found 317.0591, calcd for C<sub>15</sub>H<sub>9</sub>NO<sub>4</sub>SNa (M+Na) 322.0144; found 322.0139, calcd for C<sub>15</sub>H<sub>9</sub>NO<sub>4</sub>SK (M+K) 337.9883; found 337.9879.

### Succinimido phenyl thionarbonate (2b).

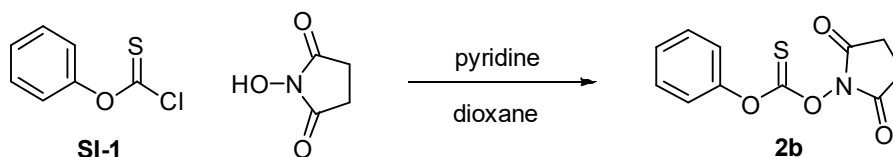

*O*-Phenyl chlorothiocarbonate **SI-1** (1 equiv, 10 mmol, 1.72 g) was added into a 100 mL flask containing a solution of *N*-hydroxysuccinimide (1 equiv, 10 mmol, 1.15 g) and pyridine (1.6 equiv, 16 mmol, 1.29 g, 1.32 mL) in dioxane (25 mL) at room temperature, and the mixture was stirred for 1 hour at room temperature and 1 hour at 50-60 °C. The mixture was cooled to room temperature and diluted with water (125 mL). The precipitate was filtered off and recrystallized from ethanol.

Yield 2.32 g, 92%. Colorless solid. Mp 141-143 °C.

<sup>1</sup>H NMR (300 MHz, CDCl<sub>3</sub>), δ: 7.50 – 7.45 (m, 2H), 7.38 – 7.34 (m, 1H), 7.26 – 7.23 (m, 2H), 2.9 (s, 4H).

<sup>13</sup>C{<sup>1</sup>H} NMR (75 MHz, CDCl<sub>3</sub>), δ: 190.7, 168.1, 153.9, 129.9, 127.4, 121.1, 25.6.

HRMS (ESI): calcd for C<sub>11</sub>H<sub>10</sub>NO<sub>4</sub>S (M+H) 252.0325; found 252.0331, calcd for C<sub>11</sub>H<sub>13</sub>N<sub>2</sub>O<sub>4</sub>S (M+NH<sub>4</sub>) 269.0591; found 269.0599, calcd for C<sub>11</sub>H<sub>9</sub>NO<sub>4</sub>SNa (M+Na) 274.0144; found 274.0151, calcd for C<sub>11</sub>H<sub>9</sub>NO<sub>4</sub>SK (M+K) 289.9884; found 289.9895.

#### *N*-Acetylacetamido phenyl thioncarbonate (**2c**).

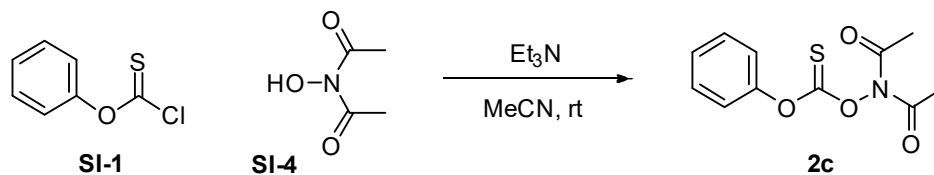

*O*-Phenyl chlorothiocarbonate **SI-1** (1 equiv, 5 mmol, 870 mg) was added into a 25 mL flask containing a solution of *N,N*-diacetylhydroxylamine **SI-4** (1 equiv, 5 mmol, 580 mg) and triethylamine (1 equiv, 5 mmol, 550 mg, 0.7 mL) in acetonitrile (10 mL) at 0 °C. The mixture was stirred for 1 hour at 0 °C, warmed to room temperature, diluted with water (50 mL) and extracted with ethyl acetate (4×25 mL). The combined organic layers were washed with water (20 mL), brine (20 mL), filtered through Na<sub>2</sub>SO<sub>4</sub>, concentrated under reduced pressure, and the residue was purified by column chromatography on silica gel.

Yield 749 mg, 59%. Colorless oil.

Chromatography: CH<sub>2</sub>Cl<sub>2</sub>. R<sub>f</sub> 0.45.

<sup>1</sup>H NMR (300 MHz, CDCl<sub>3</sub>), δ: 7.50 – 7.45 (m, 2H), 7.38 – 7.33 (m, 1H), 7.15 – 7.12 (m, 2H), 2.72 (s, 3H), 2.34 (s, 3H).

<sup>13</sup>C{<sup>1</sup>H} NMR (75 MHz, CDCl<sub>3</sub>), δ: 166.9, 165.4, 160.2, 152.7, 129.8, 127.1, 122.0, 26.4, 18.1.

HRMS (ESI): calcd for C<sub>11</sub>H<sub>12</sub>NO<sub>4</sub>S (M+H) 254.0482; found 254.0483, calcd for C<sub>11</sub>H<sub>15</sub>N<sub>2</sub>O<sub>4</sub>S (M+NH<sub>4</sub>) 271.0747; found 271.0751, calcd for C<sub>11</sub>H<sub>11</sub>NO<sub>4</sub>SNa (M+Na) 276.0301; found 276.0307, calcd for C<sub>11</sub>H<sub>11</sub>NO<sub>4</sub>SK (M+K) 292.0040; found 292.0041.

#### *N,N*-Dimethyl *O*-phthalimidyl thioncarbamate (**2d**). [10]

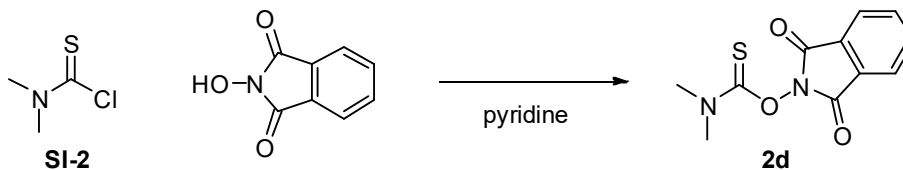

Thiocarbonyl chloride **SI-2** (1.025 equiv, 51.25 mmol, 6.33 g) was added dropwise into a 200 mL flask containing a solution of *N*-hydroxyphthalimide (1 equiv, 50 mmol, 8.2 g) in pyridine (40 mL) at 0 °C (ice bath). The cooling bath was removed, and mixture was stirred overnight at room temperature, then poured into ice water. The precipitate was filtered off and recrystallized from ethanol.



Yield 11.0 g (88%). Colorless crystals. Mp 181-183 °C.

$^1\text{H}$  NMR (300 MHz,  $\text{CDCl}_3$ ),  $\delta$ : 7.89 – 7.86 (m, 2H), 7.79 – 7.76 (m, 2H), 3.41 (s, 3H), 3.88 (s, 3H).

$^{13}\text{C}\{^1\text{H}\}$  NMR (75 MHz,  $\text{CDCl}_3$ ),  $\delta$ : 185.3, 162.0, 134.8, 128.7, 124.0, 45.1, 39.0.

HRMS (ESI): calcd for  $\text{C}_{11}\text{H}_{11}\text{N}_2\text{O}_3\text{S}$  (M+H) 251.0485; found 251.0489, calcd for  $\text{C}_{11}\text{H}_{14}\text{N}_3\text{O}_4\text{S}$  (M+ $\text{NH}_4$ ) 268.07580; found 268.0748, calcd for  $\text{C}_{11}\text{H}_{10}\text{N}_2\text{O}_3\text{SNa}$  (M+Na) 273.0304; found 273.0306, calcd for  $\text{C}_{11}\text{H}_{10}\text{N}_2\text{O}_3\text{SK}$  (M+K) 289.0044; found 289.0045.

### Di-*tert*-butyl [(phenoxycarbonothioyl)oxy]imidodicarbonate (2e).

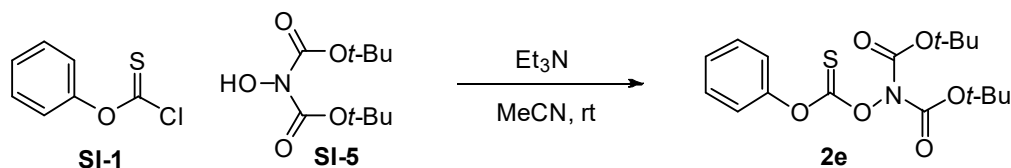

*O*-Phenyl chlorothiocarbonate **SI-1** (1 equiv, 10 mmol, 1.72 g) was added into a 50 mL flask containing a solution of *N,N*-di(*tert*-butoxycarbonyl)hydroxylamine **SI-5** (1 equiv, 10 mmol, 2.33 g) and triethylamine (1 equiv, 10 mmol, 1.01 g, 1.39 mL) in acetonitrile (28 mL) at 0 °C. The mixture was stirred for 1 hour at 0 °C, warmed to room temperature, diluted with water (160 mL) and extracted with dichloromethane (4×50 mL). The combined organic layers were washed with brine (2×25 mL), filtered through  $\text{Na}_2\text{SO}_4$ , concentrated under reduced pressure, and the residue was purified by column chromatography on silica gel.

Yield 2.38 g, 64%. Colorless oil.

Chromatography:  $\text{CH}_2\text{Cl}_2$ .  $R_f$  0.55.

$^1\text{H}$  NMR (300 MHz,  $\text{CDCl}_3$ ),  $\delta$ : 7.47 – 7.41 (m, 2H), 7.33 – 7.31 (m, 1H), 7.16 – 7.12 (m, 2H), 1.59 (s, 9H), 1.58 (s, 9H).

$^{13}\text{C}\{^1\text{H}\}$  NMR (75 MHz,  $\text{CDCl}_3$ ),  $\delta$ : 185.3, 153.2, 147.4, 129.5, 126.6, 122.1, 86.7, 86.1, 27.9, 27.6.

HRMS (ESI): calcd for  $\text{C}_{17}\text{H}_{24}\text{NO}_6\text{S}$  (M+H) 370.1319; found 370.1317, calcd for  $\text{C}_{17}\text{H}_{27}\text{N}_2\text{O}_6\text{S}$  (M+ $\text{NH}_4$ ) 387.1584; found 387.1576, calcd for  $\text{C}_{17}\text{H}_{23}\text{NO}_6\text{SNa}$  (M+Na) 392.1138; found 392.1132, calcd for  $\text{C}_{17}\text{H}_{23}\text{NO}_6\text{SK}$  (M+K) 408.0878; found 408.0872.

**Phthalimido methyl thionocarbonate (2f).**

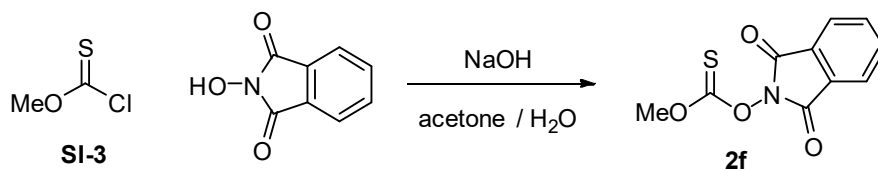

A solution of *O*-methyl chlorothiocarbonate **SI-3** (1 equiv, 10 mmol, 1.1 g) in 5 mL of acetone was added into a 50 mL flask containing a solution of *N*-hydroxyphthalimide (1 equiv, 10 mmol, 1.64 g) and NaOH (1.1 equiv, 11 mmol, 440 mg) in water (20 mL) at room temperature, and the mixture was stirred for 30 min at room temperature. The mixture was diluted with water (20 mL), the precipitate was filtered off and recrystallized from ethanol.

Yield 1.96 g, 83%. Colorless solid. Mp 136-138 °C.

<sup>1</sup>H NMR (300 MHz, CDCl<sub>3</sub>), δ: 7.95 – 7.93 (m, 2H), 7.85 – 7.83 (m, 2H), 4.27 (s, 3H).

<sup>13</sup>C {<sup>1</sup>H} NMR (75 MHz, CDCl<sub>3</sub>), δ: 193.4, 161.0, 134.9, 128.7, 124.2, 62.6.

HRMS (ESI): calcd for C<sub>10</sub>H<sub>8</sub>NO<sub>4</sub>S (M+H) 238.0169; found 238.0176, calcd for C<sub>10</sub>H<sub>11</sub>N<sub>2</sub>O<sub>4</sub>S (M+NH<sub>4</sub>) 255.0434; found 255.0428, calcd for C<sub>10</sub>H<sub>7</sub>NO<sub>4</sub>SNa (M+Na) 259.9988; found 259.9989.

## Synthesis of thiocarbonates **3** (General procedure I)

A tube containing a stirring bar was charged with carboxylic acid **1** (1.0 equiv, 0.5 mmol), thioncarbonate **2a** (1.5 equiv, 0.75 mmol, 224 mg), 9-(2-chlorophenyl)acridine **A-1** (2.5 mol%, 3.6 mg) and solvent (2 mL; for **3a-3ad**, **3af**, dichloromethane; for **3ae**, acetonitrile; for **3ag**, DMSO). The tube was closed with a puncturable screw cap, and a needle was introduced as a pressure compensator. The mixture was irradiated by 60W 400 nm LEDs for 4 hours at 20 °C; during irradiation a solution of 9-(2-chlorophenyl)acridine **A-1** (5 mol%, 7.2 mg) in the same solvent (0.5 mL) was added using a syringe pump (150  $\mu$ L/h).

For compounds **3a-3af**, the precipitate of phthalimide byproduct was filtered off, washed with dichloromethane (2 $\times$ 3 mL), the combined filtrate was concentrated under reduced pressure, and the residue was purified by column chromatography on silica gel.

For compound **3ag**, the reaction mixture was diluted with water (10 mL), extracted with dichloromethane (3 $\times$ 5 mL), filtered through Na<sub>2</sub>SO<sub>4</sub>, concentrated under reduced pressure, and the residue was purified by column chromatography on silica gel.

### **S-Isopropyl O-phenyl thiocarbonate (3a).**

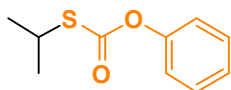

Yield 83 mg (85%). Colorless oil.

Chromatography: CH<sub>2</sub>Cl<sub>2</sub>. R<sub>f</sub> 0.75.

<sup>1</sup>H NMR (300 MHz, CDCl<sub>3</sub>),  $\delta$ : 7.47 – 7.36 (m, 2H), 7.31 – 7.23 (m, 1H), 7.22 – 7.16 (m, 2H), 3.64 (hept,  $J$  = 6.8 Hz, 1H), 1.45 (d,  $J$  = 6.8 Hz, 6H).

<sup>13</sup>C {<sup>1</sup>H} NMR (75 MHz, CDCl<sub>3</sub>),  $\delta$ : 169.8, 151.2, 129.5, 126.1, 121.5, 37.2, 23.1.

HRMS (ESI): calcd for C<sub>10</sub>H<sub>13</sub>O<sub>2</sub>S (M+H) 197.0631, found 197.0626, calcd for C<sub>10</sub>H<sub>16</sub>NO<sub>2</sub>S (M+NH<sub>4</sub>) 214.0896, found 214.0890, calcd for C<sub>10</sub>H<sub>12</sub>O<sub>2</sub>SNa (M+Na) 219.0450, found 219.0442, calcd for C<sub>10</sub>H<sub>12</sub>O<sub>2</sub>SK (M+K) 235.0190, found 235.0178.

### **S-Isopropyl O-methyl thiocarbonate (3a-Me).**

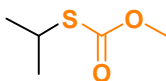

Yield 30 mg (44%). Colorless oil.

Chromatography: CH<sub>2</sub>Cl<sub>2</sub>. R<sub>f</sub> 0.8.

<sup>1</sup>H NMR (300 MHz, CDCl<sub>3</sub>),  $\delta$ : 4.17 (s, 3H), 3.82 (hept,  $J$  = 6.8 Hz, 1H), 1.41 (d,  $J$  = 6.8 Hz, 6H).

<sup>13</sup>C {<sup>1</sup>H} NMR (75 MHz, CDCl<sub>3</sub>),  $\delta$ : 167.3, 56.1, 36.7, 23.1.

HRMS (ESI): calcd for C<sub>5</sub>H<sub>10</sub>O<sub>2</sub>SNa (M+Na) 157.0294, found 157.0300.

**S-(sec-Butyl) O-phenyl thiocarbonate (3b).**

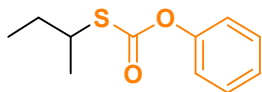

Yield 71 mg (68%). Colorless oil.

Chromatography: CH<sub>2</sub>Cl<sub>2</sub>. R<sub>f</sub> 0.75.

<sup>1</sup>H NMR (300 MHz, CDCl<sub>3</sub>), δ: 7.46 – 7.36 (m, 2H), 7.31 – 7.22 (m, 1H), 7.21 – 7.15 (m, 2H), 3.47 (tq, *J* = 8.8, 7.0 Hz, 1H), 1.85 – 1.62 (m, 2H), 1.44 (d, *J* = 7.0 Hz, 3H), 1.06 (t, *J* = 7.4 Hz, 3H).

<sup>13</sup>C{<sup>1</sup>H} NMR (75 MHz, CDCl<sub>3</sub>), δ: 170.1, 151.2, 129.5, 126.0, 121.4, 43.7, 29.5, 20.8, 11.4.

HRMS (ESI): calcd for C<sub>11</sub>H<sub>15</sub>O<sub>2</sub>S (M+H) 211.0787, found 211.0781, calcd for C<sub>11</sub>H<sub>14</sub>O<sub>2</sub>SNa (M+Na) 233.0607, found 233.0600.

**S-Cyclopentyl O-phenyl thiocarbonate (3c).**

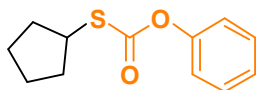

Yield 63 mg (57%). Colorless oil.

Chromatography: CH<sub>2</sub>Cl<sub>2</sub>. R<sub>f</sub> 0.7.

<sup>1</sup>H NMR (300 MHz, CDCl<sub>3</sub>), δ: 7.44 – 7.34 (m, 2H), 7.29 – 7.21 (m, 1H), 7.20 – 7.14 (m, 2H), 3.78 – 3.65 (m, 1H), 2.28 – 2.13 (m, 2H), 1.89 – 1.61 (m, 6H).

<sup>13</sup>C{<sup>1</sup>H} NMR (75 MHz, CDCl<sub>3</sub>), δ: 169.8, 151.3, 129.3, 125.9, 121.4, 44.4, 33.3, 24.8.

HRMS (ESI): calcd for C<sub>12</sub>H<sub>15</sub>O<sub>2</sub>S (M+H) 223.0787, found 223.0791, calcd for C<sub>12</sub>H<sub>18</sub>NO<sub>2</sub>S (M+NH<sub>4</sub>) 240.1053, found 240.1056, calcd for C<sub>12</sub>H<sub>14</sub>O<sub>2</sub>SNa (M+Na) 245.0807, found 245.0807, calcd for C<sub>12</sub>H<sub>14</sub>O<sub>2</sub>SK (M+K) 261.0346, found 261.0350.

**S-Cyclohexyl O-phenyl thiocarbonate (3d).**

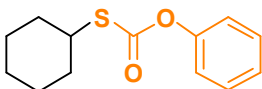

Yield 93 mg (79%). Colorless oil.

Chromatography: CH<sub>2</sub>Cl<sub>2</sub>. R<sub>f</sub> 0.7.

<sup>1</sup>H NMR (300 MHz, CDCl<sub>3</sub>), δ: 7.47 – 7.33 (m, 2H), 7.31 – 7.22 (m, 1H), 7.22 – 7.14 (m, 2H), 3.53 – 3.38 (m, 1H), 2.17 – 2.02 (m, 2H), 1.86 – 1.72 (m, 2H), 1.71 – 1.35 (m, 6H).

<sup>13</sup>C{<sup>1</sup>H} NMR (75 MHz, CDCl<sub>3</sub>), δ: 169.9, 151.2, 129.4, 126.0, 121.4, 45.0, 33.1, 25.9, 25.2.

HRMS (ESI): calcd for C<sub>13</sub>H<sub>17</sub>O<sub>2</sub>S (M+H) 237.0944, found 237.0947, calcd for C<sub>13</sub>H<sub>20</sub>NO<sub>2</sub>S (M+NH<sub>4</sub>) 254.1209, found 254.1212, calcd for C<sub>13</sub>H<sub>16</sub>O<sub>2</sub>SNa (M+Na) 259.0763, found 259.0762, calcd for C<sub>13</sub>H<sub>16</sub>O<sub>2</sub>SK (M+K) 275.0503, found 275.0483.

***S*-(1-(2-Methylbenzoyl)piperidin-4-yl) *O*-phenyl thiocarbonate (3e).**

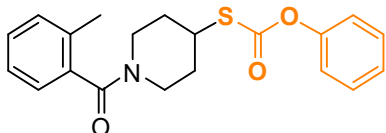

Yield 114 mg (64%). Colorless oil.

Chromatography: CH<sub>2</sub>Cl<sub>2</sub>. R<sub>f</sub> 0.35.

<sup>1</sup>H NMR (300 MHz, CDCl<sub>3</sub>), δ: 7.45 – 7.35 (m, 2H), 7.32 – 7.1 (m, 7H), 7.65 – 7.41 (m, 1H), 3.74 – 3.42 (m, 2H), 3.40 – 3.33 (m, 2H), 2.43 – 2.12 (m, 4H), 2.10 – 1.91 (m, 1H), 1.90 – 1.53 (m, 2H).

<sup>13</sup>C {<sup>1</sup>H} NMR (75 MHz, CDCl<sub>3</sub>), δ: 170.0, 169.0, 151.0, 136.0, 132.7, 130.5, 129.6, 126.3, 126.0, 125.7, 123.6, 121.3, 42.4, 31.8, 29.7, 19.0.

HRMS (ESI): calcd for C<sub>20</sub>H<sub>22</sub>NO<sub>3</sub>S (M+H) 356.1315, found 356.1317, calcd for C<sub>20</sub>H<sub>21</sub>NO<sub>3</sub>SNa (M+Na) 378.1134, found 378.1134, calcd for C<sub>20</sub>H<sub>21</sub>NO<sub>3</sub>SK (M+K) 394.0874, found 394.0865.

***O*-Phenyl *S*-(1-tosylpiperidin-4-yl) thiocarbonate (3f).**

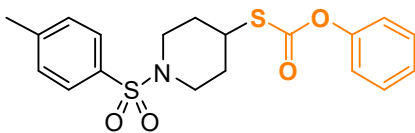

Yield 125 mg (64%). Colorless crystals. Mp 185-188 °C (1,2-dichloroethane/hexane).

Chromatography: CH<sub>2</sub>Cl<sub>2</sub>. R<sub>f</sub> 0.3.

<sup>1</sup>H NMR (300 MHz, CDCl<sub>3</sub>), δ: 7.71 – 7.62 (m, 2H), 7.42 – 7.31 (m, 4H), 7.30 – 7.22 (m, 1H), 7.17 – 7.10 (m, 2H), 3.64 – 3.52 (m, 2H), 3.42 – 3.31 (m, 1H), 2.75 – 2.61 (m, 2H), 2.45 (s, 3H), 2.22 – 2.09 (m, 2H), 1.93 – 1.76 (m, 2H).

<sup>13</sup>C {<sup>1</sup>H} NMR (75 MHz, CDCl<sub>3</sub>), δ: 168.9, 151.0, 143.8, 133.1, 129.8, 129.5, 127.7, 126.3, 121.3, 45.6, 41.4, 31.3, 21.5.

HRMS (ESI): calcd for C<sub>19</sub>H<sub>22</sub>NO<sub>4</sub>S<sub>2</sub> (M+H) 392.0985, found 392.0988, calcd for C<sub>19</sub>H<sub>25</sub>N<sub>2</sub>O<sub>4</sub>S<sub>2</sub> (M+NH<sub>4</sub>) 409.1250, found 409.1253, calcd for C<sub>19</sub>H<sub>21</sub>NO<sub>4</sub>S<sub>2</sub>Na (M+Na) 414.0804, found 414.0809, calcd for C<sub>19</sub>H<sub>21</sub>NO<sub>4</sub>S<sub>2</sub>K (M+K) 430.0544, found 430.0546.

The single crystal suitable for X-ray diffraction analysis was prepared by slow diffusion of hexane into 1,2-dichloroethane solution at 0 °C.

**S-Phenethyl O-phenyl thiocarbonate (3g).**

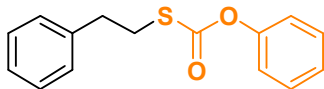

Yield 72 mg (56%). Colorless oil.

Chromatography: CH<sub>2</sub>Cl<sub>2</sub>. R<sub>f</sub> 0.65.

<sup>1</sup>H NMR (300 MHz, CDCl<sub>3</sub>), δ: 7.47 – 7.38 (m, 2H), 7.37 – 7.32 (m, 1H), 7.31 – 7.15 (m, 7H), 3.22 (t, *J* = 8.4 Hz, 2H), 3.04 (t, *J* = 8.4 Hz, 2H).

<sup>13</sup>C{<sup>1</sup>H} NMR (75 MHz, CDCl<sub>3</sub>), δ: 170.1, 151.2, 139.6, 129.5, 128.9, 128.6, 126.7, 126.1, 121.3, 36.0, 32.7.

HRMS (ESI): calcd for C<sub>15</sub>H<sub>14</sub>O<sub>2</sub>SNa (M+Na) 281.0607, found 281.0812.

**S-Neopentyl O-phenyl thiocarbonate (3h).**

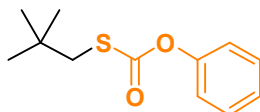

Yield 93 mg (83%). Colorless oil.

Chromatography: CH<sub>2</sub>Cl<sub>2</sub>. R<sub>f</sub> 0.75.

<sup>1</sup>H NMR (300 MHz, CDCl<sub>3</sub>), δ: 7.44 – 7.34 (m, 2H), 7.31 – 7.23 (m, 1H), 7.20 – 7.12 (m, 2H), 2.95 (s, 2H), 1.04 (s, 9H).

<sup>13</sup>C{<sup>1</sup>H} NMR (75 MHz, CDCl<sub>3</sub>), δ: 170.8, 151.4, 129.5, 126.1, 121.3, 45.0, 31.9, 28.5.

HRMS (ESI): calcd for C<sub>12</sub>H<sub>17</sub>O<sub>2</sub>S (M+H) 225.0944, found 225.0934, calcd for C<sub>12</sub>H<sub>20</sub>NO<sub>2</sub>S (M+NH<sub>4</sub>) 242.1209, found 242.1202, calcd for C<sub>12</sub>H<sub>16</sub>O<sub>2</sub>SNa (M+Na) 247.0763, found 247.0757, calcd for C<sub>12</sub>H<sub>16</sub>O<sub>2</sub>SK (M+K) 263.0503, found 263.0499.

**S-Isobutyl O-phenyl thiocarbonate (3i).**

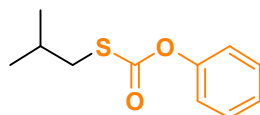

Yield 54 mg (51%). Colorless oil.

Chromatography: CH<sub>2</sub>Cl<sub>2</sub>. R<sub>f</sub> 0.75.

<sup>1</sup>H NMR (300 MHz, CDCl<sub>3</sub>), δ: 7.46 – 7.36 (m, 2H), 7.31 – 7.25 (m, 1H), 7.21 – 7.15 (m, 2H), 2.90 (d, *J* = 6.7 Hz, 2H), 1.98 (m, 1H), 1.06 (d, *J* = 6.7 Hz, 6H).

<sup>13</sup>C{<sup>1</sup>H} NMR (75 MHz, C CDCl<sub>3</sub>), δ: 170.6, 151.3, 129.5, 126.1, 121.3, 39.8, 28.8, 21.7.

HRMS (ESI): calcd for C<sub>11</sub>H<sub>15</sub>O<sub>2</sub>S (M+H) 211.0787, found 211.0786, calcd for C<sub>11</sub>H<sub>18</sub>NO<sub>2</sub>S (M+NH<sub>4</sub>) 228.1053, found 228.1045, calcd for C<sub>11</sub>H<sub>14</sub>O<sub>2</sub>SNa (M+Na) 233.0607, found 233.0598, calcd for C<sub>11</sub>H<sub>14</sub>O<sub>2</sub>SK (M+K) 249.0346, found 249.0339.

***tert*-Butyl 3-(2-((phenoxy carbonyl)thio)ethyl)-1*H*-indole-1-carboxylate (3j).**

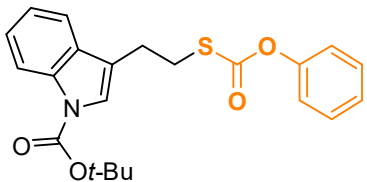

Yield 81 mg (41%). Colorless oil.

Chromatography: CH<sub>2</sub>Cl<sub>2</sub>. R<sub>f</sub> 0.3.

<sup>1</sup>H NMR (300 MHz, CDCl<sub>3</sub>), δ: 8.55 (d, *J* = 8.2 Hz, 1H), 7.62 (s, 1H), 7.51 – 7.46 (m, 2H), 7.44 – 7.37 (m, 2H), 7.32 – 7.26 (m, 2H), 7.22 – 7.16 (m, 2H), 3.34 – 3.24 (m, 2H), 3.22 – 3.12 (m, 2H), 1.54 (s, 9H).

<sup>13</sup>C{<sup>1</sup>H} NMR (75 MHz, CDCl<sub>3</sub>), δ: 168.6, 151.1, 148.6, 136.7, 135.1, 131.6, 129.4, 128.3, 126.2, 123.7, 123.0, 121.2, 120.9, 116.1, 61.4, 31.8, 29.7, 26.9.

HRMS (ESI): calcd for C<sub>22</sub>H<sub>24</sub>NO<sub>4</sub>S (M+H) 398.1421, found 398.1428.

***O*-Phenyl *S*-(tetrahydrofuran-2-yl) thiocarbonate (3k).**

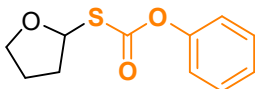

Yield 57 mg (51%). Colorless oil.

Chromatography: CH<sub>2</sub>Cl<sub>2</sub>. R<sub>f</sub> 0.65.

<sup>1</sup>H NMR (300 MHz, CDCl<sub>3</sub>), δ: 7.44 – 7.35 (m, 2H), 7.30 – 7.23 (m, 1H), 7.22 – 7.15 (m, 2H), 6.04 (dd, *J* = 7.0, 3.1 Hz, 1H), 4.02 (t, *J* = 7.0 Hz, 2H), 2.53 – 2.36 (m, 1H), 2.21 – 1.92 (m, 3H).

<sup>13</sup>C{<sup>1</sup>H} NMR (75 MHz, CDCl<sub>3</sub>), δ: 170.0, 151.1, 129.5, 126.2, 121.4, 85.8, 68.4, 32.5, 24.5.

HRMS (ESI): calcd for C<sub>11</sub>H<sub>13</sub>O<sub>3</sub>S (M+H) 225.0580, found 225.0574, calcd for C<sub>11</sub>H<sub>16</sub>NO<sub>3</sub>S (M+NH<sub>4</sub>) 242.0845, found 242.0839, calcd for C<sub>11</sub>H<sub>12</sub>O<sub>3</sub>SNa (M+Na) 247.0399, found 247.0391, calcd for C<sub>11</sub>H<sub>12</sub>O<sub>3</sub>SK (M+K) 263.0139, found 263.0132.

***S*-(Phenoxymethyl) *O*-phenyl thiocarbonate (3l).**

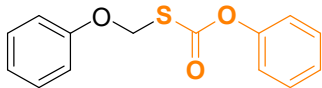

Yield 113 mg (87%). Colorless oil.

Chromatography: CH<sub>2</sub>Cl<sub>2</sub>. R<sub>f</sub> 0.6.

<sup>1</sup>H NMR (300 MHz, CDCl<sub>3</sub>), δ: 7.44 – 7.23 (m, 5H), 7.21 – 7.15 (m, 2H), 7.11 – 7.04 (m, 1H), 7.03 – 7.97 (m, 2H), 5.66 (s, 2H).

<sup>13</sup>C{<sup>1</sup>H} NMR (75 MHz, CDCl<sub>3</sub>), δ: 168.1, 156.5, 151.2, 129.7, 129.6, 126.4, 122.6, 121.2, 116.0, 69.4.

HRMS (ESI): calcd for  $C_{14}H_{16}NO_3S$  ( $M+NH_4$ ) 278.0845, found 278.0839, calcd for  $C_{14}H_{12}O_3SNa$  ( $M+Na$ ) 283.0399, found 283.0393, calcd for  $C_{14}H_{12}O_3SK$  ( $M+K$ ) 299.0139, found 299.0134.

***S*-(Methoxymethyl) *O*-phenyl thiocarbonate (3m).**

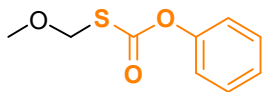

Yield 87 mg (88%). Colorless oil.

Chromatography:  $CH_2Cl_2$ .  $R_f$  0.75.

$^1H$  NMR (300 MHz,  $CDCl_3$ ),  $\delta$ : 7.42 – 7.36 (m, 2H), 7.31 – 7.26 (m, 1H), 7.23 – 7.16 (m, 2H), 5.16 (s, 2H), 3.45 (s, 3H).

$^{13}C\{^1H\}$  NMR (75 MHz,  $CDCl_3$ ),  $\delta$ : 166.4, 151.2, 129.6, 126.3, 121.2, 75.0, 57.2.

HRMS (ESI): calcd for  $C_9H_{11}O_3S$  ( $M+H$ ) 199.0423, found 199.0422, calcd for  $C_9H_{14}NO_3S$  ( $M+NH_4$ ) 216.0689, found 216.0702, calcd for  $C_9H_{10}O_3SNa$  ( $M+Na$ ) 221.0243, found 221.0237, calcd for  $C_9H_{10}O_3SK$  ( $M+K$ ) 236.9982, found 236.9978.

***S*-(1-(3-Chlorophenoxy)ethyl) *O*-phenyl thiocarbonate (3n).**

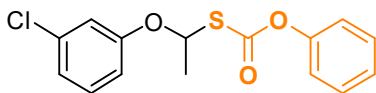

Yield 109 mg (71%). Colorless oil.

Chromatography:  $CH_2Cl_2$ .  $R_f$  0.55.

$^1H$  NMR (300 MHz,  $CDCl_3$ ),  $\delta$ : 7.46 – 7.37 (m, 2H), 7.32 – 7.23 (m, 2H), 7.19 – 7.14 (m, 2H), 7.12 – 7.04 (m, 2H), 6.99 (dm,  $J$  = 8.3 Hz, 1H), 6.08 (q,  $J$  = 6.3 Hz, 1H), 1.92 (d,  $J$  = 6.3 Hz, 3H).

$^{13}C\{^1H\}$  NMR (75 MHz,  $CDCl_3$ ),  $\delta$ : 168.5, 156.9, 151.0, 135.0, 130.4, 129.6, 126.4, 123.0, 121.2, 117.8, 115.3, 81.4, 23.3.

HRMS (ESI): calcd for  $C_{15}H_{17}^{35}ClNO_3S$  ( $M+NH_4$ ) 326.0612, found 326.0602, calcd for  $C_{15}H_{17}^{37}ClNO_3S$  ( $M+NH_4$ ) 328.0588, found 328.0574, calcd for  $C_{15}H_{13}^{35}ClO_3SNa$  ( $M+Na$ ) 331.0166, found 331.0157, calcd for  $C_{15}H_{13}^{37}ClO_3SNa$  ( $M+Na$ ) 333.0142, found 333.0132.

***S*-(2,3-Dihydrobenzo[*b*][1,4]dioxin-2-yl) *O*-phenyl thiocarbonate (3o).**

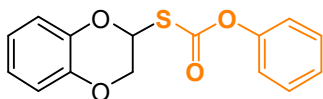

Yield 98 mg (68%). Colorless oil.

Chromatography:  $CH_2Cl_2$ .  $R_f$  0.55.



$^1\text{H}$  NMR (300 MHz,  $\text{CDCl}_3$ ),  $\delta$ : 7.48 – 7.37 (m, 2H), 7.34 – 7.26 (m, 1H), 7.24 – 7.17 (m, 2H), 7.03 – 6.91 (m, 4H), 6.29 (t,  $J = 2.3$  Hz, 1H), 4.51 (dd,  $J = 11.7, 2.3$  Hz, 1H), 4.46 (dd,  $J = 11.7, 2.3$ , 1H).

$^{13}\text{C}\{^1\text{H}\}$  NMR (75 MHz,  $\text{CDCl}_3$ ),  $\delta$ : 167.7, 151.0, 142.8, 140.8, 129.6, 126.5, 122.8, 122.5, 121.2, 118.3, 117.5, 79.0, 67.2.

HRMS (ESI): calcd for  $\text{C}_{15}\text{H}_{16}\text{NO}_4\text{S}$  ( $\text{M}+\text{NH}_4$ ) 306.0795, found 306.0794, calcd for  $\text{C}_{15}\text{H}_{12}\text{O}_4\text{SNa}$  ( $\text{M}+\text{Na}$ ) 311.0349, found 311.0351, calcd for  $\text{C}_{15}\text{H}_{12}\text{O}_4\text{SK}$  ( $\text{M}+\text{K}$ ) 327.0088, found 327.0090.

### ***O*-Phenyl *S*-(1-(pyridin-2-ylthio)ethyl) thiocarbonate (3p).**

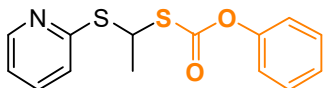

Yield 77 mg (53%). Colorless oil.

Chromatography:  $\text{CH}_2\text{Cl}_2$ .  $R_f$  0.5.

$^1\text{H}$  NMR (300 MHz,  $\text{CDCl}_3$ ),  $\delta$ : 8.52 (dm,  $J = 4.39$  Hz, 1H), 7.55 (dt,  $J = 8.2$  Hz,  $J = 1.9$  Hz, 1H), 7.45 – 7.35 (m, 2H), 7.31 – 7.14 (m, 4H), 7.07 (ddd,  $J = 7.3$  Hz,  $J = 5$  Hz,  $J = 1$  Hz, 1H), 5.59 (q,  $J = 7$  Hz, 1H), 1.96 (d,  $J = 7$  Hz, 3H).

$^{13}\text{C}\{^1\text{H}\}$  NMR (75 MHz,  $\text{CDCl}_3$ ),  $\delta$ : 169.2, 156.6, 151.1, 149.8, 130.4, 129.5, 126.2, 122.8, 121.3, 120.4, 44.8, 23.2.

HRMS (ESI): calcd for  $\text{C}_{14}\text{H}_{14}\text{NO}_2\text{S}_2$  ( $\text{M}+\text{H}$ ) 292.0460, found 292.0465.

### ***S*-(1-((Perfluoropyridin-4-yl)thio)ethyl) *O*-phenyl thiocarbonate (3q).**

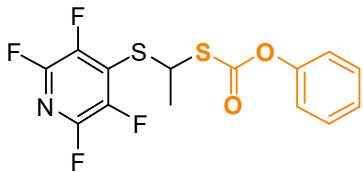

Yield 107 mg (59%). Colorless oil.

Chromatography:  $\text{CH}_2\text{Cl}_2$ .  $R_f$  0.6.

$^1\text{H}$  NMR (300 MHz,  $\text{CDCl}_3$ ),  $\delta$ : 7.42 – 7.31 (m, 2H), 7.26 – 7.17 (m, 1H), 7.16 – 7.09 (m, 2H), 5.29 (q,  $J = 7.2$  Hz, 1H), 1.88 (d,  $J = 7.2$  Hz, 3H).

$^{19}\text{F}$  NMR (282 MHz,  $\text{CDCl}_3$ ),  $\delta$ : -90.8 – -91.5 (m, 2F), -136.2 – -136.9 (m, 2F).

$^{13}\text{C}\{^1\text{H}\}$  NMR (75 MHz,  $\text{CDCl}_3$ ),  $\delta$ : 167.6, 150.8, 142.9 (dm,  $J = 289$  Hz), 141.6 (dd,  $J = 232$  Hz,  $J = 19$  Hz), 129.7, 129.2 (m), 126.6, 121.0, 48.0, 22.9.

HRMS (ESI): calcd for  $\text{C}_{14}\text{H}_{10}\text{F}_4\text{NO}_2\text{S}_2$  ( $\text{M}+\text{H}$ ) 364.0084, found 364.0089.

**S-(1-(Methylthio)ethyl) O-phenyl thiocarbonate (3r).**

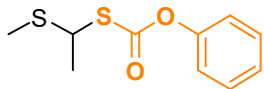

Yield 83 mg (73%). Colorless oil.

Chromatography: CH<sub>2</sub>Cl<sub>2</sub>. R<sub>f</sub> 0.8.

<sup>1</sup>H NMR (300 MHz, CDCl<sub>3</sub>), δ: 7.47 – 7.35 (m, 2H), 7.32 – 7.25 (m, 1H), 7.22 – 7.15 (m, 2H), 4.53 (q, *J* = 7.1 Hz, 1H), 2.29 (s, 3H), 1.78 (d, *J* = 7.1 Hz, 3H).

<sup>13</sup>C{<sup>1</sup>H} NMR (75 MHz, CDCl<sub>3</sub>), δ: 171.9, 150.9, 129.5, 126.2, 121.3, 48.8, 23.1, 15.1.

HRMS (ESI): calcd for C<sub>10</sub>H<sub>16</sub>NO<sub>2</sub>S<sub>2</sub> (M+NH<sub>4</sub>) 246.0617, found 246.0617, calcd for C<sub>10</sub>H<sub>12</sub>O<sub>2</sub>S<sub>2</sub>Na (M+Na) 251.0171, found 251.0176.

**S-(Isopropylthio)methyl O-phenyl thiocarbonate (3s).**

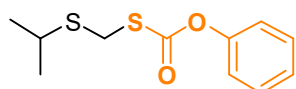

Yield 97 mg (81%). Colorless oil.

Chromatography: CH<sub>2</sub>Cl<sub>2</sub>. R<sub>f</sub> 0.75.

<sup>1</sup>H NMR (300 MHz, CDCl<sub>3</sub>), δ: 7.46 – 7.36 (m, 2H), 7.32 – 7.24 (m, 1H), 7.23 – 7.16 (m, 2H), 4.17 (s, 2H), 3.17 (hept, *J* = 6.7 Hz, 1H), 1.36 (d, *J* = 6.7 Hz, 6H).

<sup>13</sup>C{<sup>1</sup>H} NMR (75 MHz, CDCl<sub>3</sub>), δ: 169.5, 151.2, 129.6, 126.3, 121.3, 35.5, 33.4, 23.0.

HRMS (ESI): calcd for C<sub>11</sub>H<sub>15</sub>O<sub>2</sub>S<sub>2</sub> (M+H) 243.0507, found 243.0512, calcd for C<sub>11</sub>H<sub>14</sub>O<sub>2</sub>S<sub>2</sub>Na (M+Na) 265.0327, found 265.0329, calcd for C<sub>11</sub>H<sub>12</sub>O<sub>2</sub>S<sub>2</sub>K (M+K) 281.0067, found 281.0075.

**S-(1-(1H-Pyrazol-1-yl)ethyl) O-phenyl thiocarbonate (3t).**

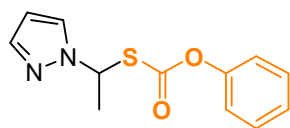

Yield 72 mg (58%). Colorless oil.

Chromatography: CH<sub>2</sub>Cl<sub>2</sub>. R<sub>f</sub> 0.45.

<sup>1</sup>H NMR (300 MHz, CDCl<sub>3</sub>), δ: 7.68 (d, *J* = 1.9 Hz, 1H), 7.45 – 7.34 (m, 2H), 7.33 – 7.24 (m, 1H), 7.19 – 7.11 (m, 2H), 6.98 – 6.90 (m, 1H), 6.29 (dd, *J* = 2.1 Hz, *J* = 1.9 Hz, 1H), 6.14 (q, *J* = 7.3 Hz, 1H), 2.07 (d, *J* = 7.2 Hz, 3H).

<sup>13</sup>C{<sup>1</sup>H} NMR (75 MHz, CDCl<sub>3</sub>), δ: 168.7, 150.9, 140.9, 129.6, 126.5, 121.2, 120.4, 115.5, 61.7, 21.3.

HRMS (ESI): calcd for C<sub>12</sub>H<sub>13</sub>N<sub>2</sub>O<sub>2</sub>S (M+H) 249.0692, found 249.0695, calcd for C<sub>12</sub>H<sub>12</sub>N<sub>2</sub>O<sub>2</sub>SNa (M+Na) 271.0512, found 271.0513, calcd for C<sub>12</sub>H<sub>12</sub>N<sub>2</sub>O<sub>2</sub>SK (M+K) 287.0251, found 287.0249.

**S-(2-Phenoxypropan-2-yl) O-phenyl thiocarbonate (3u).**

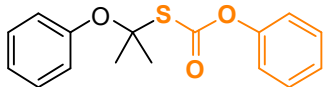

Yield 114 mg (79%). Colorless oil.

Chromatography: CH<sub>2</sub>Cl<sub>2</sub>. R<sub>f</sub> 0.6.

<sup>1</sup>H NMR (300 MHz, CDCl<sub>3</sub>), δ: 7.31 – 7.20 (m, 3H), 7.19 – 7.13 (m, 2H), 7.23 – 7.14 (m, 5H), 1.95 (s, 6H).

<sup>13</sup>C{<sup>1</sup>H} NMR (75 MHz, CDCl<sub>3</sub>), δ: 167.6, 154.0, 150.9, 129.5, 129.1, 126.2, 124.7, 123.6, 121.4, 92.3, 29.1.

HRMS (ESI): calcd for C<sub>16</sub>H<sub>20</sub>NO<sub>3</sub>S (M+NH<sub>4</sub>) 306.1158, found 306.1157, calcd for C<sub>16</sub>H<sub>16</sub>O<sub>3</sub>SNa (M+Na) 311.0712, found 311.0715, calcd for C<sub>16</sub>H<sub>16</sub>O<sub>3</sub>SK (M+K) 327.0452, found 327.0454.

**S-(3-Methyloxetan-3-yl) O-phenyl thiocarbonate (3v).**

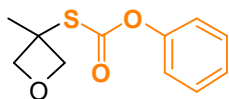

Yield 71 mg (63%). Colorless oil.

Chromatography: CH<sub>2</sub>Cl<sub>2</sub>. R<sub>f</sub> 0.65.

<sup>1</sup>H NMR (300 MHz, CDCl<sub>3</sub>), δ: 7.46 – 7.36 (m, 2H), 7.32 – 7.23 (m, 1H), 7.22 – 7.15 (m, 2H), 4.87 (d, *J* = 6.7 Hz, 2H), 4.68 (d, *J* = 6.7 Hz, 2H), 1.92 (s, 3H).

<sup>13</sup>C{<sup>1</sup>H} NMR (75 MHz, CDCl<sub>3</sub>), δ: 168.1, 150.9, 129.6, 126.4, 121.3, 83.0, 47.5, 26.1.

HRMS (ESI): calcd for C<sub>11</sub>H<sub>13</sub>O<sub>3</sub>S (M+H) 225.0580, found 225.0584, calcd for C<sub>11</sub>H<sub>16</sub>NO<sub>3</sub>S (M+NH<sub>4</sub>) 242.0845, found 242.0852, calcd for C<sub>11</sub>H<sub>12</sub>O<sub>3</sub>SNa (M+Na) 247.0399, found 247.0403.

**S-(1-Hydroxy-2-methylpropan-2-yl) O-phenyl thiocarbonate (3w).**

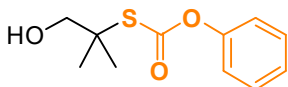

Yield 98 mg (87%). Colorless oil.

Chromatography: CH<sub>2</sub>Cl<sub>2</sub>. R<sub>f</sub> 0.45.

<sup>1</sup>H NMR (300 MHz, CDCl<sub>3</sub>), δ: 7.46 – 7.35 (m, 2H), 7.31 – 7.22 (m, 1H), 7.20 – 7.13 (m, 2H), 3.82 (s, 2H), 2.32 – 2.07 (br s, 1H), 1.51 (s, 6H).

<sup>13</sup>C{<sup>1</sup>H} NMR (75 MHz, CDCl<sub>3</sub>), δ: 169.1, 150.8, 129.5, 126.2, 121.4, 69.4, 53.0, 24.7.

HRMS (ESI): calcd for C<sub>11</sub>H<sub>15</sub>O<sub>3</sub>S (M+H) 227.0736, found 227.0744, calcd for C<sub>11</sub>H<sub>14</sub>O<sub>3</sub>SNa (M+Na) 249.0556, found 249.0558.

**S-(tert-Butyl) O-phenyl thiocarbonate (3x).**

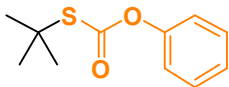

Yield 84 mg (80%). Colorless oil.

Chromatography: CH<sub>2</sub>Cl<sub>2</sub>. R<sub>f</sub> 0.75.

<sup>1</sup>H NMR (300 MHz, CDCl<sub>3</sub>), δ: 7.42 – 7.31 (m, 2H), 7.25 – 7.17 (m, 1H), 7.19 – 7.09 (m, 2H), 1.52 (s, 9H).

<sup>13</sup>C{<sup>1</sup>H} NMR (75 MHz, CDCl<sub>3</sub>), δ: 169.0, 150.9, 129.4, 126.0, 121.5, 47.8, 29.9.

HRMS (ESI): calcd for C<sub>11</sub>H<sub>14</sub>O<sub>2</sub>S (M+H) 211.0787, found 211.0797.

**S-(Adamantan-1-yl) O-phenyl thiocarbonate (3y).**

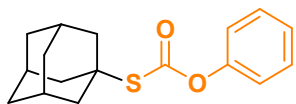

Yield 114 mg (79%). Colorless oil.

Chromatography: CH<sub>2</sub>Cl<sub>2</sub>. R<sub>f</sub> 0.75.

<sup>1</sup>H NMR (300 MHz, CDCl<sub>3</sub>), δ: 7.45 – 7.34 (m, 2H), 7.28 – 7.22 (m, 1H), 7.21 – 7.14 (m, 2H), 2.26 – 2.17 (m, 4H), 2.15 – 2.08 (m, 2H), 1.96 – 1.71 (m, 9H).

<sup>13</sup>C{<sup>1</sup>H} NMR (75 MHz, CDCl<sub>3</sub>), δ: 168.4, 150.9, 129.4, 125.9, 121.5, 50.5, 41.9, 36.2, 29.8.

HRMS (ESI): calcd for C<sub>17</sub>H<sub>21</sub>O<sub>2</sub>S (M+H) 289.1257, found 289.1258, calcd for C<sub>17</sub>H<sub>24</sub>NO<sub>2</sub>S (M+NH<sub>4</sub>) 306.1527, found 306.1526, calcd for C<sub>17</sub>H<sub>20</sub>O<sub>2</sub>SNa (M+Na) 311.1076, found 311.1078, calcd for C<sub>17</sub>H<sub>20</sub>O<sub>2</sub>SK (M+K) 327.0816, found 327.0815.

**S-(1-(Phthalimidyl)-2-methylpropyl) O-phenyl thiocarbonate (3z).**

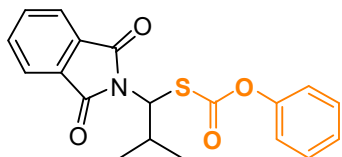

Yield 85 mg (48%). Colorless oil.

Chromatography: CH<sub>2</sub>Cl<sub>2</sub>. R<sub>f</sub> 0.25.

<sup>1</sup>H NMR (300 MHz, CDCl<sub>3</sub>), δ: 7.93 – 7.85 (m, 2H), 7.81 – 7.72 (m, 2H), 7.43 – 7.31 (m, 2H), 7.26 – 7.19 (m, 1H), 7.17 – 7.11 (m, 2H), 5.71 (d, *J* = 7.7 Hz, 1H), 2.77 – 2.61 (m, 1H), 1.26 (d, *J* = 6.6 Hz, 3H), 0.99 (d, *J* = 6.6 Hz, 3H).

<sup>13</sup>C{<sup>1</sup>H} NMR (75 MHz, CDCl<sub>3</sub>), δ: 168.7, 167.0, 151.0, 134.3, 131.6, 129.4, 126.2, 123.7, 121.2, 61.4, 31.8, 20.4, 19.6.

HRMS (ESI): calcd for C<sub>19</sub>H<sub>18</sub>NO<sub>4</sub>S (M+H) 356.0951, found 356.0940, calcd for C<sub>19</sub>H<sub>21</sub>N<sub>2</sub>O<sub>4</sub>S (M+NH<sub>4</sub>) 373.1217, found 373.1211, calcd for C<sub>19</sub>H<sub>17</sub>NO<sub>4</sub>SNa (M+Na) 378.0770, found 378.0756, calcd for C<sub>19</sub>H<sub>17</sub>NO<sub>4</sub>SK (M+K) 394.0510, found 394.0494.

**S-(1-(Phthalimidyl)-2-phenylethyl) O-phenyl thiocarbonate (3aa).**

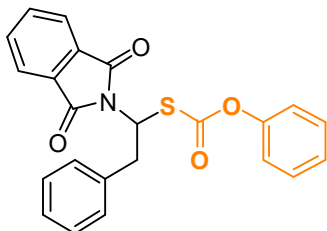

Yield 111 mg (55%). Colorless oil.

Chromatography: CH<sub>2</sub>Cl<sub>2</sub>. R<sub>f</sub> 0.3.

<sup>1</sup>H NMR (300 MHz, CDCl<sub>3</sub>), δ: 8.08 – 8.01 (m, 2H), 7.91 – 7.81 (m, 4H), 7.78 – 7.71 (m, 2H), 7.46 – 7.12 (m, 6H), 6.29 (dd, *J* = 11.9 Hz, *J* = 10.9 Hz, 1H), 3.71 (dd, *J* = 14.0, 10.9, 1H), 3.53 (dd, *J* = 14.0, 11.9, 1H).

<sup>13</sup>C{<sup>1</sup>H} NMR (75 MHz, CDCl<sub>3</sub>), δ: 168.3, 166.7, 151.0, 135.9, 134.3, 132.0, 129.7, 129.5, 128.6, 127.3, 126.4, 123.6, 120.9, 55.3, 39.7.

HRMS (ESI): calcd for C<sub>23</sub>H<sub>18</sub>NO<sub>4</sub>S (M+H) 404.0951, found 404.0968, calcd for C<sub>23</sub>H<sub>21</sub>N<sub>2</sub>O<sub>4</sub>S (M+NH<sub>4</sub>) 421.1217, found 421.1231, calcd for C<sub>23</sub>H<sub>17</sub>NO<sub>4</sub>SNa (M+Na) 426.0770, found 426.0780, calcd for C<sub>23</sub>H<sub>17</sub>NO<sub>4</sub>SK (M+K) 442.0510, found 442.0523.

**S-(5-(2,5-Dimethylphenoxy)-2-methylpentan-2-yl) O-phenyl thiocarbonate (3ab).**

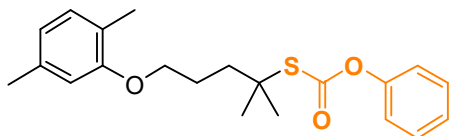

Yield 127 mg (71%). Colorless oil.

Chromatography: CH<sub>2</sub>Cl<sub>2</sub>. R<sub>f</sub> 0.65.

<sup>1</sup>H NMR (300 MHz, CDCl<sub>3</sub>), δ: 7.47 – 7.37 (m, 2H), 7.31 – 7.22 (m, 1H), 7.22 – 7.16 (m, 2H), 7.03 (d, *J* = 7.5 Hz, 1H), 6.69 (d, *J* = 7.5 Hz, 1H), 6.64 (s, 1H), 4.02 (t, *J* = 5.2 Hz, 2H), 2.37 (s, 3H), 2.24 (s, 3H), 2.13 – 1.95 (m, 4H), 1.62 (s, 6H).

<sup>13</sup>C{<sup>1</sup>H} NMR (75 MHz, CDCl<sub>3</sub>), δ: 168.5, 156.9, 151.0, 136.3, 130.4, 129.4, 125.9, 123.5, 121.6, 120.8, 111.0, 67.6, 51.1, 37.9, 28.0, 25.3, 21.5, 15.9.

HRMS (ESI): calcd for C<sub>21</sub>H<sub>27</sub>O<sub>3</sub>S (M+H) 359.1675, found 359.1666, calcd for C<sub>21</sub>H<sub>30</sub>NO<sub>3</sub>S (M+NH<sub>4</sub>) 376.1941, found 376.1934, calcd for C<sub>21</sub>H<sub>26</sub>O<sub>3</sub>SNa (M+Na) 381.1495, found 381.1484, calcd for C<sub>21</sub>H<sub>26</sub>O<sub>3</sub>SK (M+K) 397.1234, found 397.1228.

**S-(Heptan-4-yl) O-phenyl thiocarbonate (3ac).**

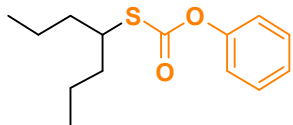

Yield 87 mg (69%). Colorless oil.

Chromatography: CH<sub>2</sub>Cl<sub>2</sub>. R<sub>f</sub> 0.75.

<sup>1</sup>H NMR (300 MHz, CDCl<sub>3</sub>), δ: 7.45 – 7.34 (m, 2H), 7.30 – 7.22 (m, 1H), 7.21 – 7.14 (m, 2H), 3.53 – 2.42 (m, 1H), 1.77 – 1.62 (m, 4H), 1.59 – 1.42 (m, 4H), 0.97 (t, *J* = 8.7 Hz, 6H).

<sup>13</sup>C{<sup>1</sup>H} NMR (75 MHz, CDCl<sub>3</sub>), δ: 170.4, 151.3, 129.4, 126.0, 121.4, 47.2, 37.0, 20.0, 13.9.

HRMS (ESI): calcd for C<sub>14</sub>H<sub>21</sub>O<sub>2</sub>S (M+H) 253.1257, found 253.1264, calcd for C<sub>14</sub>H<sub>24</sub>NO<sub>2</sub>S (M+NH<sub>4</sub>) 270.1522, found 270.1529, calcd for C<sub>14</sub>H<sub>20</sub>O<sub>2</sub>SNa (M+Na) 275.1076, found 275.1064, calcd for C<sub>14</sub>H<sub>20</sub>O<sub>2</sub>SK (M+K) 291.0816, found 291.0821.

**S-(2-(4-Chlorophenoxy)propan-2-yl) O-phenyl thiocarbonate (3ad).**

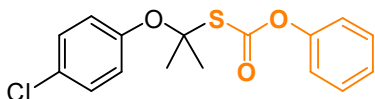

Yield 92 mg (57%). Colorless oil.

Chromatography: CH<sub>2</sub>Cl<sub>2</sub>. R<sub>f</sub> 0.45.

<sup>1</sup>H NMR (300 MHz, CDCl<sub>3</sub>), δ: 7.44 – 7.37 (m, 2H), 7.33 – 7.24 (m, 3H), 7.20 – 7.11 (m, 4H), 1.93 (s, 6H).

<sup>13</sup>C{<sup>1</sup>H} NMR (75 MHz, CDCl<sub>3</sub>), δ: 167.3, 152.5, 150.8, 129.5, 129.2, 126.2, 124.8, 121.4, 117.2, 92.3, 29.0.

HRMS (ESI): calcd for C<sub>16</sub>H<sub>19</sub><sup>35</sup>ClNO<sub>3</sub>S (M+NH<sub>4</sub>) 340.0769, found 340.0777, calcd for C<sub>16</sub>H<sub>19</sub><sup>37</sup>ClNO<sub>3</sub>S (M+NH<sub>4</sub>) 342.0740, found 342.0748, calcd for C<sub>16</sub>H<sub>15</sub><sup>35</sup>ClO<sub>3</sub>SNa (M+Na) 345.0323, found 345.0330, calcd for C<sub>16</sub>H<sub>15</sub><sup>37</sup>ClO<sub>3</sub>SNa (M+Na) 347.0294, found 347.0302.

**S-(1-Benzamido-2-methylpropyl) O-phenyl thiocarbonate (3ae).**

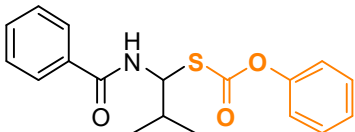

Yield 61 mg (37%). Colorless crystals.

Chromatography: CH<sub>2</sub>Cl<sub>2</sub>. R<sub>f</sub> 0.2.

<sup>1</sup>H NMR (300 MHz, CDCl<sub>3</sub>), δ: 7.82 – 7.72 (m, 2H), 7.59 – 7.37 (m, 3H), 7.35 – 7.22 (m, 2H), 7.14 – 7.05 (m, 2H), 7.02 – 6.93 (m, 1H), 6.53 – 6.41 (br d, *J* = 9.3 Hz, 1H), 6.03 (dd, *J* = 9.3, 5.9 Hz, 1H), 2.20 (dq, *J* = 13.3, 6.3 Hz, 1H), 1.13 (t, *J* = 6.3 Hz, 6H).

$^{13}\text{C}\{^1\text{H}\}$  NMR (75 MHz,  $\text{CDCl}_3$ ),  $\delta$ : 167.6, 167.0, 156.7, 133.9, 131.9, 129.7, 128.7, 127.0, 121.6, 115.8, 82.3, 33.9, 17.6, 17.2.

HRMS (ESI): calcd for  $\text{C}_{18}\text{H}_{20}\text{NO}_3\text{S}$  (M+H) 330.1158, found 330.1159, calcd for  $\text{C}_{18}\text{H}_{23}\text{N}_2\text{O}_3\text{S}$  (M+ $\text{NH}_4$ ) 347.1413, found 347.1422, calcd for  $\text{C}_{18}\text{H}_{19}\text{NO}_3\text{SK}$  (M+K) 368.0717, found 368.0706.

***S*-(2,4-Dichlorophenoxy)methyl *O*-phenyl thiocarbonate (3af).**

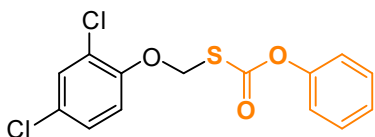

Yield 134 mg (82%). Colorless oil.

Chromatography:  $\text{CH}_2\text{Cl}_2$ .  $R_f$  0.55.

$^1\text{H}$  NMR (300 MHz,  $\text{CDCl}_3$ ),  $\delta$ : 7.48 – 7.41 (m, 2H), 7.39 (s, 1H), 7.34 – 7.20 (m, 4H), 7.04 (d,  $J$  = 8.7 Hz, 1H), 5.69 (s, 2H).

$^{13}\text{C}\{^1\text{H}\}$  NMR (75 MHz,  $\text{CDCl}_3$ ),  $\delta$ : 167.7, 151.1, 151.0, 130.5, 129.6, 127.8, 127.7, 126.5, 126.0, 121.1, 118.1, 71.3.

HRMS (ESI): calcd for  $\text{C}_{14}\text{H}_{14}^{35}\text{Cl}^{35}\text{ClNO}_3\text{S}$  (M+ $\text{NH}_4$ ) 346.0066, found 346.0054, calcd for  $\text{C}_{14}\text{H}_{14}^{35}\text{Cl}^{37}\text{ClNO}_3\text{S}$  (M+ $\text{NH}_4$ ) 348.0037, found 348.0028, calcd for  $\text{C}_{14}\text{H}_{14}^{37}\text{Cl}^{37}\text{ClNO}_3\text{S}$  (M+ $\text{NH}_4$ ) 350.0007, found 350.0008, calcd for  $\text{C}_{14}\text{H}_{10}^{35}\text{Cl}^{35}\text{ClO}_3\text{SNa}$  (M+Na) 390.9620, found 390.9618. calcd for  $\text{C}_{14}\text{H}_{10}^{35}\text{Cl}^{37}\text{ClO}_3\text{SNa}$  (M+Na) 352.9591, found 352.9581.

***S*-(3-(Nicotinamido)propyl *O*-phenyl thiocarbonate (3ag).**

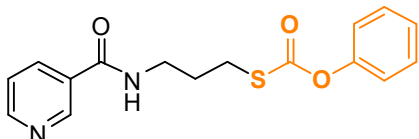

Yield 55 mg (35%). Colorless oil.

Chromatography:  $\text{CH}_2\text{Cl}_2/\text{EtOAc}$  5/1.  $R_f$  0.35.

$^1\text{H}$  NMR (300 MHz,  $\text{DMSO}-d_6$ ),  $\delta$ : 9.40 (s, 1H), 9.07 (s, 1H), 8.67 (d,  $J$  = 3.9 Hz, 1H), 8.25 (d,  $J$  = 7.9 Hz), 7.51 – 7.39 (m, 1H), 7.19 – 7.04 (m, 2H), 6.89 – 6.77 (m, 2H), 6.75 – 6.65 (m, 1H), 3.38 – 3.25 (m, 2H), 2.61 – 2.51 (m, 2H), 2.18 (t,  $J$  = 6.7 Hz, 2H).

$^{13}\text{C}\{^1\text{H}\}$  NMR (75 MHz,  $\text{DMSO}-d_6$ ),  $\delta$ : 170.8, 165.1, 158.5, 152.0, 149.0, 135.3, 130.6, 129.7, 123.8, 120.9, 118.9, 40.5, 29.7, 25.8.

HRMS (ESI): calcd for  $\text{C}_{16}\text{H}_{17}\text{N}_2\text{O}_3\text{S}$  (M+H) 317.0954, found 317.0949, for  $\text{C}_{16}\text{H}_{16}\text{N}_2\text{O}_3\text{SNa}$  (M+Na) 339.0774, found 339.0776.

***S*-(2,2-Difluoro-3-methylbut-3-en-1-yl) *O*-phenyl thiocarbonate (11).**

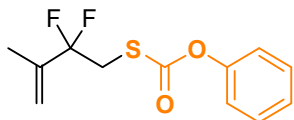

Yield 37 mg (29%). Colorless oil.

Chromatography: CH<sub>2</sub>Cl<sub>2</sub>. R<sub>f</sub> 0.75.

<sup>1</sup>H NMR (300 MHz, CDCl<sub>3</sub>), δ: 7.47 – 7.37 (m, 2H), 7.36 – 7.25 (m, 1H), 7.22 – 7.15 (m, 2H), 5.44 (s, 1H), 5.26 (s, 1H), 3.56 (t, *J* = 13.4 Hz, 2H), 1.91 (s, 3H).

<sup>19</sup>F NMR (282 MHz, CDCl<sub>3</sub>), δ: -100.2 (t, *J* = 13.4 Hz).

<sup>13</sup>C{<sup>1</sup>H} NMR (75 MHz, CDCl<sub>3</sub>), δ: 168.9, 151.2, 138.6 (t, *J* = 24.2 Hz), 129.6, 126.4, 121.1, 119.9 (t, *J* = 247.3 Hz), 116.9 (t, *J* = 8.0 Hz), 36.1 (t, *J* = 31.4 Hz), 17.3 (t, *J* = 3.0 Hz).

HRMS (ESI): calcd for C<sub>12</sub>H<sub>12</sub>F<sub>2</sub>O<sub>3</sub>SNa (M+Na) 281.0418, found 281.0412.



## Synthesis of thiols 4 (General procedure II)

A 50 mL flask containing a stirring bar was charged with carboxylic acid **1** (1.0 equiv, 2 mmol), thionocarbonate **2a** (1.5 equiv, 3 mmol, 898 mg), 9-(2-chlorophenyl)acridine **A-1** (2.5 mol%, 14.4 mg) and dichloromethane (8 mL). The flask was closed with a rubber septum, and a needle was introduced as a pressure compensator. The mixture was irradiated by 60W 400 nm LEDs for 4 hours at 20 °C; during irradiation a solution of 9-(2-chlorophenyl)acridine **A-1** (5 mol%, 28.8 mg) in dichloromethane (1 mL) was added using a syringe pump (250  $\mu$ L/h). Then, K<sub>2</sub>CO<sub>3</sub> (5 equiv, 5 mmol, 690 mg), methanol (10 mL) and water (2 mL) were added, dichloromethane was evaporated under vacuum at room temperature (until vacuum reached *ca.* 25 Torr), the flask was filled with argon, and the mixture was stirred at room temperature for 4 hours. The mixture was diluted with water (20 mL) and extracted with hexanes (4 $\times$ 20 mL). The combined organic layers were filtered through Na<sub>2</sub>SO<sub>4</sub>, concentrated under reduced pressure, and the residue was purified by column chromatography on silica gel.

*NOTE:* After completion of the treatment with potassium carbonate, extraction and chromatography should be carried out within two hours to avoid oxidation of thiols.

### 5-(2,5-Dimethyl-phenoxy)-2-methyl-pentane-2-thiol (**4a**). [11]

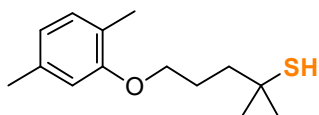

Yield 336 mg (71%). Colorless oil.

Chromatography: hexanes/EtOAc, 20/1. R<sub>f</sub> 0.30.

<sup>1</sup>H NMR (300 MHz, CDCl<sub>3</sub>),  $\delta$ : 7.05 (d,  $J$  = 7.4 Hz, 1H), 6.71 (d,  $J$  = 7.4 Hz, 1H), 6.67 (s, 1H), 4.00 (t,  $J$  = 6.3, 2H), 2.36 (s, 3H), 2.23 (s, 3H), 2.04 – 1.93 (m, 2H), 1.84 – 1.75 (m, 2H), 1.46 (s, 6H).

<sup>13</sup>C{<sup>1</sup>H} NMR (75 MHz, CDCl<sub>3</sub>),  $\delta$ : 157.0, 136.5, 130.3, 123.6, 120.8, 112.0, 68.0, 44.5, 43.1, 32.8, 25.7, 21.4, 15.8.

### Cyclohexanethiol (**4b**). [12]

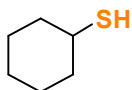

Yield 172 mg (74%). Colorless oil.

Chromatography: hexanes/EtOAc, 20/1. R<sub>f</sub> 0.45.

$^1\text{H}$  NMR (300 MHz,  $\text{CDCl}_3$ ),  $\delta$ : 2.85 – 2.65 (m, 1H), 2.05 – 1.85 (m, 2H), 1.79 – 1.64 (m, 2H), 1.62 – 1.51 (m, 1H), 1.46 (d,  $J = 6.5$  Hz, 1H), 1.40 – 1.04 (m 5H).  
 $^{13}\text{C}\{^1\text{H}\}$  NMR (75 MHz,  $\text{CDCl}_3$ ),  $\delta$ : 38.4, 37.9, 26.3, 25.3.

#### 2-Phenyl-ethanethiol (4c). [13]

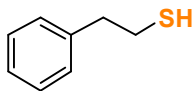

Yield 158 mg (58%). Colorless oil.

Chromatography: hexanes/EtOAc, 20/1.  $R_f$  0.40.

$^1\text{H}$  NMR (300 MHz,  $\text{CDCl}_3$ ),  $\delta$ : 7.42 – 7.21 (m, 5H), 3.04 – 2.93 (m, 2H), 2.89 – 2.77 (m, 2H), 1.43 (t,  $J = 7.8$  Hz, 1H).

$^{13}\text{C}\{^1\text{H}\}$  NMR (75 MHz,  $\text{CDCl}_3$ ),  $\delta$ : 139.9, 128.8, 128.6, 126.6, 40.3, 26.1.

#### 2-Mercapto-2-methyl-propan-1-ol (4d). [14]

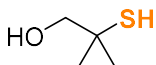

Yield 176 mg (83%). Colorless oil.

Chromatography: hexanes/EtOAc, 10/1.  $R_f$  0.6.

$^1\text{H}$  NMR (300 MHz,  $\text{CDCl}_3$ ),  $\delta$ : 3.65 (s, 2H), 2.18 – 1.97 (br s, 1H), 1.93 – 1.86 (br s, 1H), 1.35 (s, 6H).

$^{13}\text{C}\{^1\text{H}\}$  NMR (75 MHz,  $\text{CDCl}_3$ ),  $\delta$ : 73.0, 49.5, 28.2.

#### 2-Methyl-propane-2-thiol (4e).

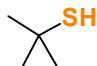

Yield 116 mg (64%). Colorless oil.

Chromatography: pentane.  $R_f$  0.30.

$^1\text{H}$  NMR (300 MHz,  $\text{CDCl}_3$ ),  $\delta$ : 1.84 (s, 1H), 1.45 (s, 9H).

$^{13}\text{C}\{^1\text{H}\}$  NMR (75 MHz,  $\text{CDCl}_3$ ),  $\delta$ : 41.2, 35.0.

#### Adamantane-1-thiol (4f). [13]

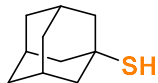

Yield 288 mg (85%). Colorless solid. Mp 100-103 °C.

Chromatography: hexanes/EtOAc, 20/1.  $R_f$  0.55.

$^1\text{H}$  NMR (300 MHz,  $\text{CDCl}_3$ ),  $\delta$ : 2.17 – 2.06 (m, 3H), 1.95 – 1.76 (br s, 1H), 1.74 – 1.67 (m, 6H), 1.63 – 1.55 (m, 6H).

$^{13}\text{C}\{^1\text{H}\}$  NMR (75 MHz,  $\text{CDCl}_3$ ),  $\delta$ : 45.3, 42.2, 36.1, 30.7.

**(4-Mercapto-piperidin-1-yl)-o-tolyl-methanone (4g).**

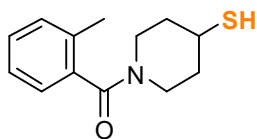

Yield 136 mg (29%). Colorless oil.

Chromatography: CH<sub>2</sub>Cl<sub>2</sub>/EtOAc, 4/1. R<sub>f</sub> 0.35.

<sup>1</sup>H NMR (300 MHz, CDCl<sub>3</sub>), δ: 8.21 (dd, *J* = 7.9 Hz, *J* = 1.1 Hz, 1H), 7.56 – 7.47 (m, 1H), 7.39 – 7.26 (m, 2H), 4.02 – 3.85 (m, 4H), 2.63 – 2.52 (m, 7H), 2.39 – 2.30 (m, 1H), 1.37 – 1.22 (br s, 1H).

<sup>13</sup>C {<sup>1</sup>H} NMR (75 MHz, CDCl<sub>3</sub>), δ: 167.5, 141.4, 134.2, 133.9, 132.4, 131.9, 126.4, 42.6, 40.9, 30.2, 22.0.

HRMS (ESI): calcd for C<sub>12</sub>H<sub>18</sub>NOS (M+H) 236.1104, found 236.1109.

## Synthesis of sulfides **5** (General procedure III)

A 50 mL flask containing a stirring bar was charged with 3-phenylpropionic acid (1.0 equiv, 2 mmol, 300 mg), thionocarbonate **2a** (1.5 equiv, 3 mmol, 898 mg), 9-(2-chlorophenyl)acridine **A-1** (2.5 mol%, 14.4 mg) and dichloromethane (8 mL). The flask was closed with a rubber septum, and a needle was introduced as a pressure compensator. The mixture was irradiated by 60W 400 nm LEDs for 4 hours at 20 °C; during irradiation a solution of 9-(2-chlorophenyl)acridine **A-1** (5 mol%, 28.8 mg) in dichloromethane (1 mL) was added using a syringe pump (250  $\mu$ L/h). Then, halide (5 equiv, 5 mmol), K<sub>2</sub>CO<sub>3</sub> (5 equiv, 5 mmol, 690 mg), solvent (10 mL; for **5a**, **5b**, **5f**, methanol; for **5d**, **5e**, **5g**, acetonitrile; for **5c**, ethanol) and water (2 mL) were added, dichloromethane was evaporated under reduced pressure at room temperature (until vacuum reached *ca.* 25 Torr), the flask was filled with argon, and the mixture was stirred under argon atmosphere while heating at 60-70 °C (oil bath temperature) for 4 hours.

For compounds **5a**, **5b**, **5d-g**, the mixture was cooled to room temperature, diluted with dichloromethane (40 mL) and washed with water (3 $\times$ 5 mL) and brine (5 mL). The organic layer was filtered through Na<sub>2</sub>SO<sub>4</sub>, concentrated under reduced pressure, and the residue was purified by column chromatography on silica gel.

For compound **5c**, the mixture was cooled to room temperature, concentrated under reduced pressure, diluted with water (10 mL) and extracted with EtOAc (3 $\times$ 10 mL). The aqueous layer was acidified with 1M aqueous HCl to pH = 2 and extracted with EtOAc (4 $\times$ 15 mL). The combined organic layers were filtered through Na<sub>2</sub>SO<sub>4</sub>, concentrated under reduced pressure, and the residue was purified by column chromatography on silica gel.

### (2-Allylsulfanyl-ethyl)-benzene (**5a**). [15]

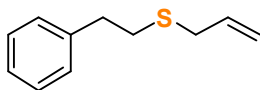

Yield 230 mg (64%). Colorless oil.

Chromatography: hexanes/EtOAc, 10/1. R<sub>f</sub> 0.70.

<sup>1</sup>H NMR (300 MHz, CDCl<sub>3</sub>),  $\delta$ : 7.38 – 7.23 (m, 5H), 5.94 – 5.78 (m, 1H), 5.20 – 5.12 (m, 2H), 3.19 (dt, *J* = 7.1 Hz, *J* = 0.9 Hz, 2H), 2.96 – 2.88 (m, 2H), 2.81 – 2.73 (m, 2H).

<sup>13</sup>C{<sup>1</sup>H} NMR (75 MHz, CDCl<sub>3</sub>),  $\delta$ : 140.7, 134.5, 128.6, 128.5, 126.4, 117.0, 36.1, 34.9, 32.1.

**(2-Butylsulfanyl-ethyl)-benzene (5b).** [16]

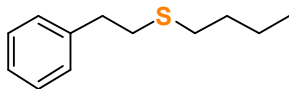

Yield 237 mg (61%). Colorless oil.

Chromatography: hexanes/EtOAc, 10/1.  $R_f$  0.70.

$^1\text{H}$  NMR (300 MHz,  $\text{CDCl}_3$ ),  $\delta$ : 7.41 – 7.32 (m, 2H), 7.31 – 7.23 (m, 3H), 3.00 – 2.91 (m, 2H), 2.88 – 2.74 (m, 2H), 2.60 (t,  $J = 7.4$  Hz, 2H), 1.71 – 1.59 (m, 2H), 1.55 – 1.41 (m, 2H), 0.99 (t,  $J = 7.3$  Hz, 3H).

$^{13}\text{C}\{^1\text{H}\}$  NMR (75 MHz,  $\text{CDCl}_3$ ),  $\delta$ : 140.9, 128.6, 128.5, 126.3, 36.5, 33.7, 32.1, 31.8, 22.1, 13.8.

**Phenethylsulfanyl-acetic acid (5c).** [17]

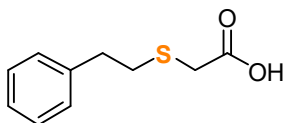

Yield 227 mg (58%). White solid. Mp 55-57 °C (ethanol/water 1:1).

Chromatography: EtOAc.  $R_f$  0.4.

$^1\text{H}$  NMR (300 MHz,  $\text{CDCl}_3$ ),  $\delta$ : 11.25 – 10.85 (br s, 1H), 7.41 – 7.20 (m, 5H), 3.35 – 3.22 (br s, 2H), 3.04 – 2.91 (br s, 4H).

$^{13}\text{C}\{^1\text{H}\}$  NMR (75 MHz,  $\text{CDCl}_3$ ),  $\delta$ : 177.0, 139.9, 128.7, 128.6, 126.6, 35.6, 34.2, 33.6.

**7-Phenethylsulfanylmethyl-pteridine-2,4-diamine (5d).**

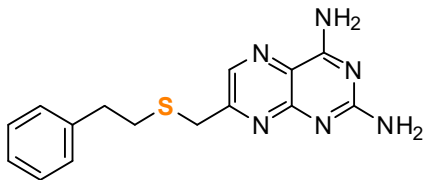

Yield 181 mg (29%). Colorless solid. Mp 194-197 °C (ethanol, dec.).

Chromatography:  $\text{CH}_2\text{Cl}_2/\text{MeOH}$ , 5/1.  $R_f$  0.30.

$^1\text{H}$  NMR (300 MHz,  $\text{DMSO}-d_6$ ),  $\delta$ : 8.75 (s, 1H), 7.7 – 7.45 (br, 2H), 7.31 – 7.14 (m, 5H), 6.7 – 6.55 (br s, 2H), 3.94 (s, 2H), 2.86 – 2.67 (m, 4H).

$^{13}\text{C}\{^1\text{H}\}$  NMR (75 MHz,  $\text{DMSO}-d_6$ ),  $\delta$ : 163.8, 163.3, 155.4, 151.4, 147.0, 140.8, 129.0, 128.7, 126.6, 121.2, 35.7, 34.5, 32.6.

HRMS (ESI): calcd for  $\text{C}_{15}\text{H}_{17}\text{N}_6\text{S}$  (M+H) 313.1230, found 313.1227; calcd for  $\text{C}_{15}\text{H}_{16}\text{N}_6\text{SNa}$  (M+Na) 335.1049, found 335.1043.

### 3-Isopropyl-5-phenethylsulfanyl-[1,2,4]oxadiazole (5e).

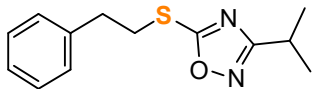

Yield 378 mg (76%). Colorless oil.

Chromatography: CH<sub>2</sub>Cl<sub>2</sub>. R<sub>f</sub> 0.60.

<sup>1</sup>H NMR (300 MHz, CDCl<sub>3</sub>), δ: 7.40 – 7.20 (m, 5H), 3.58 – 3.44 (m, 2H), 3.17 – 3.08 (m, 2H), 3.04 – 2.96 (m, 1H), 1.38 (d, *J* = 7 Hz, 6H).

<sup>13</sup>C{<sup>1</sup>H} NMR (75 MHz, CDCl<sub>3</sub>), δ: 177.2, 175.3, 139.1, 128.7, 128.6, 126.9, 35.8, 34.0, 26.8, 20.4.

HRMS (ESI): calcd for C<sub>13</sub>H<sub>17</sub>N<sub>2</sub>OS (M+H) 249.1056, found 249.1051.

### 2,3,5,6-Tetrafluoro-4-phenethylsulfanyl-pyridine (5f). [18]

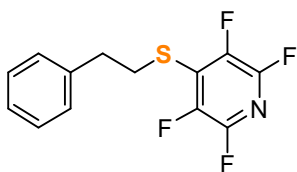

Yield 384 mg (67%). Colorless oil.

Chromatography: hexanes/EtOAc, 10/1. R<sub>f</sub> 0.65.

<sup>1</sup>H NMR (300 MHz, CDCl<sub>3</sub>), δ: 7.36 – 7.17 (m, 5H), 3.39 (t, *J* = 7.9 Hz, 2H), 2.98 (t, *J* = 7.9 Hz, 2H).

<sup>19</sup>F NMR (282 MHz, CDCl<sub>3</sub>), δ: -95.3 – -95.6 (m, 2F), -138.4 – -138.6 (m, 2F).

<sup>13</sup>C{<sup>1</sup>H} NMR (75 MHz, CDCl<sub>3</sub>), δ: 142.5 (dm, *J* = 254.3 Hz), 140.8 (dm, *J* = 246.5 Hz), 138.9, 131.4 – 130.7 (m), 128.6, 128.5, 126.7, 36.6, 34.3 (t, *J* = 4.6 Hz).

### 3,5-Dinitro-2-phenethylsulfanyl-pyridine (5g).

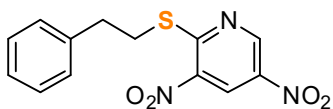

Yield 363 mg (59%). Light yellow solid. Mp 122-124 °C (ethanol).

Chromatography: CH<sub>2</sub>Cl<sub>2</sub>. R<sub>f</sub> 0.35.

<sup>1</sup>H NMR (300 MHz, CDCl<sub>3</sub>), δ: 9.41 (d, *J* = 2.4 Hz, 1H), 9.20 (d, *J* = 2.4 Hz, 1H), 7.40 – 7.20 (m, 5H), 3.65 – 3.56 (m, 2H), 3.13 – 3.03 (m, 2H).

<sup>13</sup>C{<sup>1</sup>H} NMR (75 MHz, CDCl<sub>3</sub>), δ: 165.1, 147.2, 140.7, 139.7, 139.5, 128.8, 128.7, 128.6, 126.9, 34.7, 32.9.

<sup>14</sup>N NMR (21.69 MHz, CDCl<sub>3</sub>), δ: -18.9.

HRMS (ESI): calcd for C<sub>13</sub>H<sub>12</sub>N<sub>3</sub>O<sub>4</sub>S (M+H) 306.0543, found 306.0548.

## Synthesis of sulfonamides **6** (General procedure IV)

A 50 mL flask containing a stirring bar was charged with 3-phenylpropionic acid (1.0 equiv, 2 mmol, 300 mg), thionocarbonate **2a** (1.5 equiv, 3 mmol, 898 mg), 9-(2-chlorophenyl)acridine **A-1** (2.5 mol%, 14.4 mg) and dichloromethane (8 mL). The flask was closed with a rubber septum, and a needle was introduced as a pressure compensator. The mixture was irradiated by 60W 400 nm LEDs for 4 hours at 20 °C; during irradiation a solution of 9-(2-chlorophenyl)acridine **A-1** (5 mol%, 28.8 mg) in dichloromethane (1 mL) was added using a syringe pump (250  $\mu$ L/h). Then, acetic acid (10 mL) and water (5 equiv, 5 mmol, 90  $\mu$ L) were added, dichloromethane was evaporated under reduced pressure at room temperature (until vacuum reached *ca.* 25 Torr), and a slow stream of chlorine was bubbled at room temperature until the mixture was saturated. The mixture was stirred at room temperature for 15 minutes, concentrated under reduced pressure, diluted with acetonitrile (10 mL) followed by addition of amine (5 equiv, 5 mmol) at 0 °C (ice bath). The mixture was stirred at room temperature for 15 min, diluted with water (10 mL) and extracted with EtOAc (3 $\times$ 20 mL). The combined organic layers were filtered through Na<sub>2</sub>SO<sub>4</sub>, concentrated under reduced pressure, and the residue was purified by column chromatography on silica gel.

### 4-(2-Phenyl-ethanesulfonyl)-morpholine (**6a**). [19]

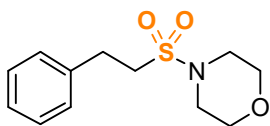

Yield 352 mg (69%). Colorless oil.

Chromatography: CH<sub>2</sub>Cl<sub>2</sub>. R<sub>f</sub> 0.5.

<sup>1</sup>H NMR (300 MHz, CDCl<sub>3</sub>),  $\delta$ : 7.41 – 7.19 (m, 5H), 3.79 – 3.71 (m, 4H), 3.34 – 3.23 (m, 4H), 3.231 – 3.11 (m, 4H).

<sup>13</sup>C {<sup>1</sup>H} NMR (75 MHz, CDCl<sub>3</sub>),  $\delta$ : 137.9, 128.9, 128.4, 127.0, 66.6, 50.4, 45.8, 29.2.

HRMS (ESI): calcd for C<sub>12</sub>H<sub>18</sub>NO<sub>3</sub>S (M+H) 256.1002, found 256.1009.

### Cyclohexanesulfonic acid isopropylamide (**6b**). [20]

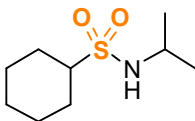

Yield 291 mg (71%). Colorless solid. Mp 65-67 °C (hexane).

Chromatography: CH<sub>2</sub>Cl<sub>2</sub>. R<sub>f</sub> 0.35.

$^1\text{H}$  NMR (300 MHz,  $\text{CDCl}_3$ ),  $\delta$ : 5.72 – 5.31 (br s, 1H), 4.02 (hept,  $J = 7.0$  Hz, 1H), 3.53 (tt,  $J = 11.8, 3.5$  Hz, 1H), 2.47 – 2.34 (m, 2H), 2.05 – 1.92 (m, 2H), 1.81 – 1.62 (m, 3H), 1.47 – 1.20 (m, 3H), 1.14 (d,  $J = 7.0$  Hz, 6H).

$^{13}\text{C}\{^1\text{H}\}$  NMR (75 MHz,  $\text{CDCl}_3$ ),  $\delta$ : 74.9, 49.9, 27.2, 25.0, 24.7, 24.0.

**2-Methyl-propane-2-sulfonic acid benzyl-methyl-amide (6c).**

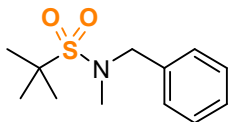

Yield 390 mg (81%). Colorless oil.

Chromatography:  $\text{CH}_2\text{Cl}_2$ .  $R_f$  0.55.

$^1\text{H}$  NMR (300 MHz,  $\text{CDCl}_3$ ),  $\delta$ : 7.38 – 7.17 (m, 5H), 4.65 (s, 2H), 2.99 (s, 3H), 1.34 (s, 9H).

$^{13}\text{C}\{^1\text{H}\}$  NMR (75 MHz,  $\text{CDCl}_3$ ),  $\delta$ : 137.6, 129.6, 127.3, 127.2, 53.2, 38.9, 36.1, 28.4.

HRMS (ESI): calcd for  $\text{C}_{12}\text{H}_{20}\text{NO}_2\text{S}$  ( $\text{M}+\text{H}$ ) 242.1209, found 242.1215; calcd for  $\text{C}_{12}\text{H}_{19}\text{NO}_2\text{SNa}$  ( $\text{M}+\text{Na}$ ) 264.1029, found 264.1038.



## Synthesis of sulfonyl fluorides 7 (General procedure V)

Selectfluor (7.5 equiv, 664 mg, 1.875 mmol) was added to a stirred solution of thiocarbonate **3** (1 equiv, 0.25 mmol) in acetonitrile (2.5 mL) and water (0.25 mL) at room temperature, and the mixture was heated at reflux (*ca.* 85 °C) for 2 hours. At this point, TLC control indicated consumption of the starting thiocompound. For the work-up, water (2.5 mL) was added, and the mixture was extracted with dichloromethane (3×10 mL). The combined organic layers were filtered through Na<sub>2</sub>SO<sub>4</sub>, concentrated under reduced pressure, and the residue was purified by column chromatography on silica gel.

### 2-Phenyl-ethanesulfonyl fluoride (7a). [21]

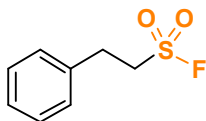

Yield 36 mg (77%) from **3g**, 42 mg (89%) from **4c**. Colorless oil.

Chromatography: CH<sub>2</sub>Cl<sub>2</sub>. R<sub>f</sub> 0.9.

<sup>1</sup>H NMR (300 MHz, CDCl<sub>3</sub>), δ: 7.34 – 7.09 (m, 5H), 3.59 – 3.48 (m, 2H), 3.23 – 3.10 (m, 2H).

<sup>19</sup>F NMR (282 MHz, CDCl<sub>3</sub>), δ: 52.5.

<sup>13</sup>C{<sup>1</sup>H} NMR (75 MHz, CDCl<sub>3</sub>), δ: 136.0, 129.1, 128.4, 127.6, 52.1 (d, *J* = 15.4 Hz), 29.6.

### Cyclohexanesulfonyl fluoride (7b). [22]

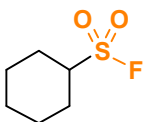

Yield 32 mg (77%). Colorless oil.

Chromatography: CH<sub>2</sub>Cl<sub>2</sub>. R<sub>f</sub> 0.9.

<sup>1</sup>H NMR (300 MHz, CDCl<sub>3</sub>), δ: 3.39 – 3.26 (m, 1H), 2.41 – 2.24 (m, 2H), 2.06 – 1.90 (m, 2H), 1.84 – 1.64 (m, 3H), 1.44 – 1.26 (m, 3H).

<sup>19</sup>F NMR (282 MHz, CDCl<sub>3</sub>), δ: 40.7.

<sup>13</sup>C{<sup>1</sup>H} NMR (75 MHz, CDCl<sub>3</sub>), δ: 61.0 (d, *J* = 12.8 Hz), 26.5, 24.7, 24.6.

### 2-Methyl-propane-2-sulfonyl fluoride (7c).

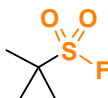

Yield 11 mg (31%). Colorless oil.

Chromatography: CH<sub>2</sub>Cl<sub>2</sub>. R<sub>f</sub> 0.9.

$^1\text{H}$  NMR (300 MHz,  $\text{CDCl}_3$ ),  $\delta$ : 1.36 (s, 9H).

$^{19}\text{F}$  NMR (282 MHz,  $\text{CDCl}_3$ ),  $\delta$ : 47.9.

$^{13}\text{C}\{^1\text{H}\}$  NMR (75 MHz,  $\text{CDCl}_3$ ),  $\delta$ : 68.3 (d,  $J = 10.5$  Hz), 28.8.

HRMS (ESI): calcd for  $\text{C}_4\text{H}_{10}\text{FO}_2\text{S}$  (M+H) 141.0380, found 141.0386.

## X-ray crystallographic data

X-ray diffraction data were collected at 100K on a four-circle Rigaku Synergy S diffractometer equipped with a HyPix6000HE area-detector (kappa geometry, shutterless  $\omega$ -scan technique), using monochromatized Cu  $K\alpha$ -radiation. The intensity data were integrated and corrected for absorption and decay by the CrysAlisPro program. [23] The structure was solved by direct methods using SHELXT [24] and refined on  $F^2$  using SHELXL-2018 [25] in the OLEX2 program. [26] All non-hydrogen atoms were refined with individual anisotropic displacement parameters. All hydrogen atoms were placed in ideal calculated positions and refined as riding atoms with relative isotropic displacement parameters. A rotating group model was applied for methyl groups.

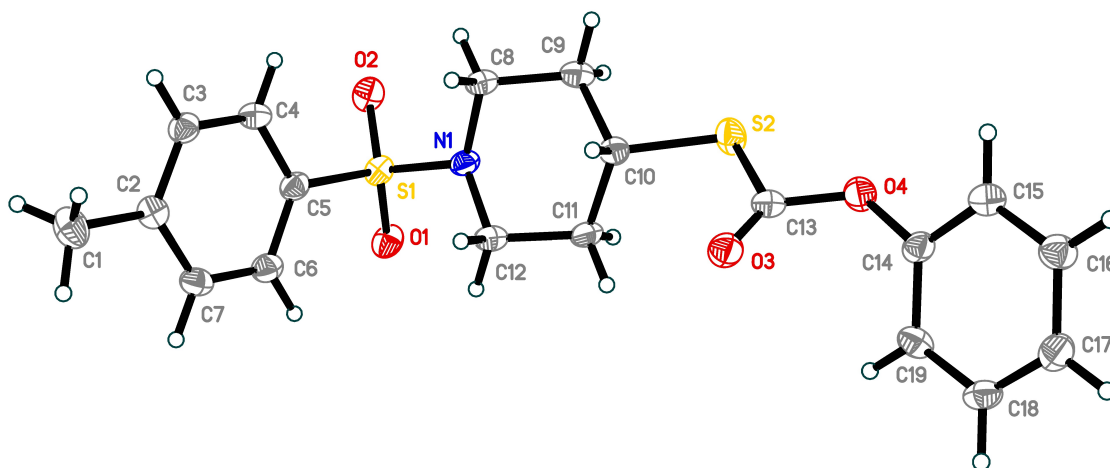

**Figure S1.** X-ray structure of compound **3f**. Anisotropic displacement parameters are drawn at the 50% probability.

**Table S1.** Crystal data and structure refinement for compound **3f**.

|                                   |                                                                                             |
|-----------------------------------|---------------------------------------------------------------------------------------------|
| CCDC number                       | 2271075                                                                                     |
| Empirical formula                 | C <sub>19</sub> H <sub>21</sub> NO <sub>4</sub> S <sub>2</sub>                              |
| Formula weight                    | 391.49                                                                                      |
| Temperature                       | 99.9(3) K                                                                                   |
| Wavelength                        | 1.54184 Å                                                                                   |
| Crystal system                    | Orthorhombic                                                                                |
| Space group                       | P2 <sub>1</sub> 2 <sub>1</sub> 2 <sub>1</sub>                                               |
| Unit cell dimensions              | a = 6.29180(10) Å    α = 90°<br>b = 7.95790(10) Å    ω = 90°<br>c = 37.0360(5) Å    γ = 90° |
| Volume                            | 1854.37(5) Å <sup>3</sup>                                                                   |
| Z                                 | 4                                                                                           |
| Density (calculated)              | 1.402 Mg/m <sup>3</sup>                                                                     |
| Absorption coefficient            | 2.815 mm <sup>-1</sup>                                                                      |
| F(000)                            | 824                                                                                         |
| Crystal size                      | 0.5 × 0.3 × 0.3 mm <sup>3</sup>                                                             |
| Theta range for data collection   | 2.386 to 77.798°                                                                            |
| Index ranges                      | -6 ≤ h ≤ 7<br>-10 ≤ k ≤ 10<br>-46 ≤ l ≤ 46                                                  |
| Reflections collected             | 13457                                                                                       |
| Independent reflections           | 3782 [R(int) = 0.0488]                                                                      |
| Completeness to theta = 67.684°   | 99.8 %                                                                                      |
| Absorption correction             | Semi-empirical from equivalents                                                             |
| Max and min transmission          | 1.00000 and 0.53768                                                                         |
| Refinement method                 | Full-matrix least-squares on F <sup>2</sup>                                                 |
| Data / restraints / parameters    | 3782 / 0 / 237                                                                              |
| Goodness-of-fit on F <sup>2</sup> | 1.086                                                                                       |
| Final R indices [I > 2σ(I)]       | R1 = 0.0463, wR2 = 0.1209                                                                   |
| R indices (all data)              | R1 = 0.0481, wR2 = 0.1219                                                                   |
| Absolute structure parameter      | 0.18(3)                                                                                     |
| Largest diff. peak and hole       | 0.517 and -0.437 e·Å <sup>-3</sup>                                                          |

Crystal structure determination was performed in the Department of Structural Studies of Zelinsky Institute of Organic Chemistry, Moscow.

## DFT calculations

All calculations were carried out using the Gaussian09 package [27]. Geometries of stationary points were optimized using the (u) $\omega$ B97XD functional with the def2-TZVP basis set. Stationary points were verified by vibrational analysis (no imaginary frequencies for intermediates and single imaginary frequency for the transition states). Solvation effects were evaluated using the PCM model (dichloromethane as solvent). Structures are given in the xyz format (visualized with CYLview26 [28]) with energies in Hartrees.

The simplified reaction pathway given in the main text (Scheme S1, blue) was chosen according to the conformational analysis – the addition of isopropyl radical was considered through conformer **trap-2** of reagent **2a** in accordance with the Curtin–Hammett principle.

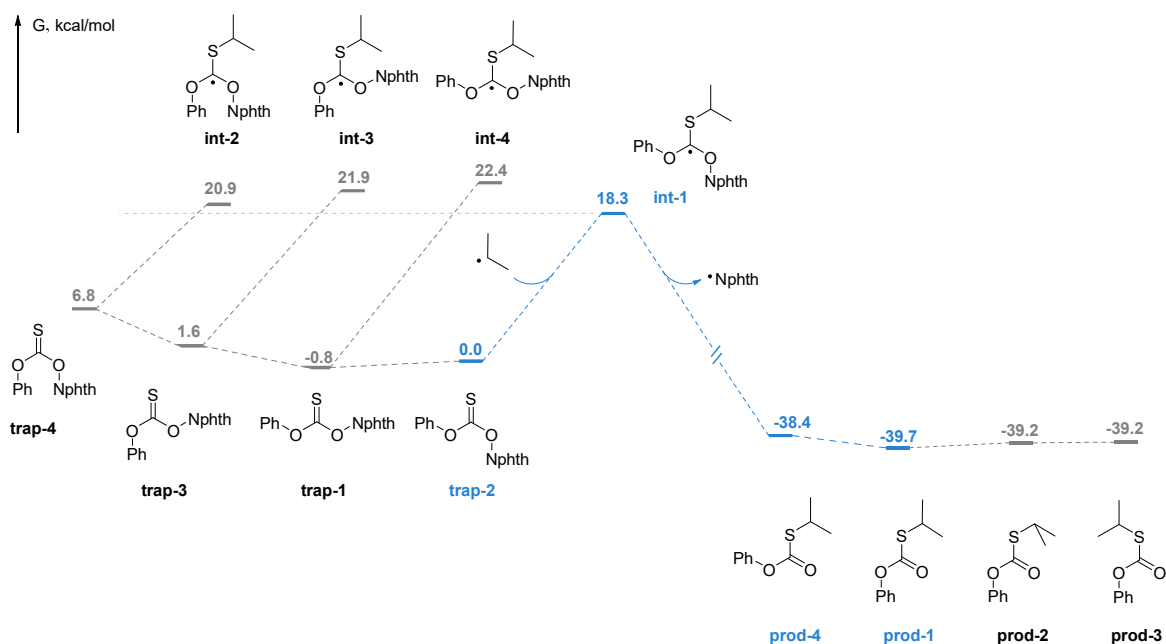

**Scheme S1.** Gibbs free energy profile for the addition-elimination step considering various conformers.

Activation barrier  $\Delta G^\ddagger$  of a single electron transfer between phthalimide radical ( $\bullet\text{Nphth}$ ) and acridinyl radical ( $\bullet\text{Acr-H}$ ) was estimated according to the Marcus-Hush theory [29,30].

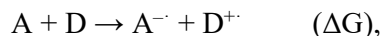

where  $A = \bullet\text{Nphth}$ ,  $D = \bullet\text{Acr-H}$

$$\Delta G^\ddagger = (\lambda + \Delta G)^2 / 4\lambda$$

The reorganization energy  $\lambda$  was calculated as the sum of two contributions – inner-sphere ( $\lambda_i$ ) and outer-sphere ( $\lambda_o$ ). The first contribution was estimated via the improved Nelsen's four-point method [31,32]:

$$\lambda = \lambda_i + \lambda_o$$

$$\lambda_i^2 = \lambda_{for} \cdot \lambda_{back} = (E_{ncg} - E_n) (E_{cng} - E_c)$$

where  $E_{ncg}$  – electronic energy of **n**eutral species at the **c**harged species' **g**eometry,

$E_{cng}$  – electronic energy of **c**harged species at the **n**eutral species' **g**eometry,

$E_n$  – electronic energy of ground state of **n**eutral species,

$E_c$  – electronic energy of ground state of **c**harged species.

$$\lambda_i^2 = 21.60 \cdot 12.44 = 268.77$$

$$\lambda_i = 16.39 \text{ kcal/mol}$$

The outer-sphere (solvent) contribution was estimated using the Born model for the solvation of a charged species [29,33]:

$$\lambda_o = 332.2 \text{ kcal} \cdot \text{\AA} / \text{mol} (1/\epsilon_s - 1/\epsilon_{op}) (1/2r_1 + 1/2r_2 - 1/(r_1+r_2))$$

For dichloromethane static dielectric constant  $\epsilon_s = 4.90$ , optical dielectric constant (which is square of refractive index)  $\epsilon_{op} = 1.4244^2 = 2.03$ . The radii of phthalimide ( $r_1 = 3.08 \text{ \AA}$ ) and acridinyl ( $r_2 = 3.82 \text{ \AA}$ ) species are estimated as the radii of spheres with the same volume of the molecule using the VEGA ZZ program [34].

$$\lambda_o = 332.2 (1/2.03 - 1/4.90) (1/3.08 + 1/7.65 - 1/6.90) = 14.23 \text{ kcal/mol}$$

$$\lambda = 14.23 + 16.39 = 30.62 \text{ kcal/mol}$$

Having the  $\Delta G = -38.81 \text{ kcal/mol}$ , we obtain:

$$\Delta G^\ddagger = (\lambda + \Delta G)^2 / 4\lambda = (30.62 - 38.81)^2 / (4 \cdot 30.62) = 0.55 \text{ kcal/mol}$$

# Energies and Cartesian coordinates

## Thionocarbonate 2a (trap-1)

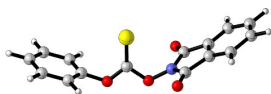

SCF Energy = -1330.86349727  
Zero-point correction = 0.214250  
Thermal correction to Energy = 0.230865  
Thermal correction to Enthalpy = 0.231810  
Thermal correction to Gibbs Free Energy = 0.166444  
Sum of electronic and zero-point Energies = -1330.649247  
Sum of electronic and thermal Energies = -1330.632632  
Sum of electronic and thermal Enthalpies = -1330.631688  
Sum of electronic and thermal Free Energies = -1330.697053

|   |              |              |              |
|---|--------------|--------------|--------------|
| S | -0.846479000 | -0.000077000 | 1.248460000  |
| C | -1.058102000 | 0.000083000  | -0.359354000 |
| O | -2.168121000 | 0.000154000  | -1.057324000 |
| C | -3.405119000 | 0.000052000  | -0.400669000 |
| C | -4.006814000 | 1.210742000  | -0.126297000 |
| C | -4.006762000 | -1.210734000 | -0.126622000 |
| C | -5.262981000 | 1.202526000  | 0.461412000  |
| C | -5.262929000 | -1.202734000 | 0.461091000  |
| C | -5.889472000 | -0.000158000 | 0.755533000  |
| H | -3.499901000 | 2.135885000  | -0.365400000 |
| H | -3.499807000 | -2.135791000 | -0.365970000 |
| H | -5.752329000 | 2.141119000  | 0.685627000  |
| H | -5.752231000 | -2.141410000 | 0.685057000  |
| H | -6.869850000 | -0.000240000 | 1.213440000  |
| O | -0.075227000 | 0.000203000  | -1.309836000 |
| N | 1.188304000  | 0.000129000  | -0.828908000 |
| C | 1.882667000  | -1.179747000 | -0.538920000 |
| C | 1.882695000  | 1.179891000  | -0.538622000 |
| C | 3.197908000  | 0.694834000  | -0.044617000 |
| C | 5.412479000  | 0.694817000  | 0.786506000  |
| C | 5.412480000  | -0.695100000 | 0.786285000  |
| C | 4.296479000  | 1.414987000  | 0.367760000  |
| H | 6.295044000  | -1.225546000 | 1.118318000  |
| H | 4.290604000  | 2.496642000  | 0.366260000  |
| C | 4.296478000  | -1.415138000 | 0.367315000  |
| H | 4.290598000  | -2.496793000 | 0.365483000  |
| C | 3.197904000  | -0.694855000 | -0.044830000 |
| H | 6.295044000  | 1.225158000  | 1.118706000  |
| O | 1.453379000  | 2.288554000  | -0.680476000 |
| O | 1.453334000  | -2.288349000 | -0.681160000 |

## Thionocarbonate 2a (trap-2)

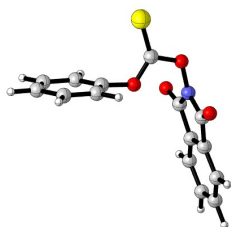

SCF Energy = -1330.86137846

Zero-point correction = 0.213976  
 Thermal correction to Energy = 0.230657  
 Thermal correction to Enthalpy = 0.231601  
 Thermal correction to Gibbs Free Energy = 0.165560  
 Sum of electronic and zero-point Energies = -1330.647403  
 Sum of electronic and thermal Energies = -1330.630722  
 Sum of electronic and thermal Enthalpies = -1330.629777  
 Sum of electronic and thermal Free Energies = -1330.695819

|   |              |              |              |
|---|--------------|--------------|--------------|
| S | 2.555049000  | -2.422477000 | 0.001473000  |
| C | 1.230512000  | -1.487727000 | 0.000490000  |
| O | 1.124343000  | -0.182147000 | -0.000332000 |
| C | 2.273025000  | 0.620969000  | -0.000409000 |
| C | 2.790686000  | 1.028370000  | -1.211865000 |
| C | 2.788874000  | 1.031037000  | 1.210917000  |
| C | 3.885484000  | 1.879545000  | -1.203568000 |
| C | 3.883690000  | 1.882197000  | 1.202358000  |
| C | 4.431029000  | 2.305217000  | -0.000662000 |
| H | 2.346381000  | 0.683496000  | -2.135821000 |
| H | 2.343177000  | 0.688233000  | 2.134973000  |
| H | 4.310092000  | 2.211877000  | -2.141599000 |
| H | 4.306899000  | 2.216638000  | 2.140274000  |
| H | 5.283506000  | 2.971723000  | -0.000755000 |
| O | 0.004444000  | -2.081805000 | 0.000411000  |
| N | -1.071714000 | -1.243599000 | 0.000194000  |
| C | -1.628490000 | -0.735348000 | -1.178627000 |
| C | -1.628194000 | -0.734528000 | 1.178792000  |
| C | -2.732059000 | 0.135303000  | 0.694921000  |
| C | -4.572574000 | 1.620249000  | 0.694618000  |
| C | -4.572830000 | 1.619670000  | -0.695312000 |
| C | -3.644882000 | 0.872258000  | 1.415282000  |
| H | -5.305319000 | 2.212955000  | -1.226376000 |
| H | -3.638679000 | 0.870717000  | 2.496905000  |
| C | -3.645400000 | 0.871089000  | -1.415700000 |
| H | -3.639578000 | 0.868681000  | -2.497324000 |
| C | -2.732297000 | 0.134741000  | -0.695070000 |
| H | -5.304874000 | 2.213966000  | 1.225462000  |
| O | -1.241481000 | -0.975336000 | 2.286204000  |
| O | -1.242286000 | -0.977177000 | -2.285990000 |

### Thionocarbonate 2a (trap-3)

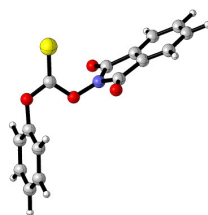

SCF Energy = -1330.85980209  
 Zero-point correction = 0.214264  
 Thermal correction to Energy = 0.230883  
 Thermal correction to Enthalpy = 0.231827  
 Thermal correction to Gibbs Free Energy = 0.166594  
 Sum of electronic and zero-point Energies = -1330.645538  
 Sum of electronic and thermal Energies = -1330.628919  
 Sum of electronic and thermal Enthalpies = -1330.627975  
 Sum of electronic and thermal Free Energies = -1330.693208

|   |             |              |              |
|---|-------------|--------------|--------------|
| S | 0.096971000 | 2.219944000  | -1.509885000 |
| C | 1.068149000 | 1.176221000  | -0.735429000 |
| O | 2.376235000 | 1.237060000  | -0.766306000 |
| C | 3.188101000 | 0.256555000  | -0.164203000 |
| C | 3.426679000 | -0.922658000 | -0.841110000 |
| C | 3.784358000 | 0.555885000  | 1.042678000  |



|   |              |              |              |
|---|--------------|--------------|--------------|
| C | 4.291540000  | -1.844409000 | -0.272169000 |
| C | 4.650246000  | -0.375627000 | 1.597692000  |
| C | 4.902261000  | -1.573193000 | 0.944520000  |
| H | 2.943012000  | -1.113201000 | -1.789855000 |
| H | 3.574842000  | 1.496930000  | 1.532927000  |
| H | 4.488427000  | -2.776997000 | -0.784246000 |
| H | 5.127918000  | -0.160926000 | 2.544527000  |
| H | 5.579383000  | -2.295203000 | 1.381594000  |
| O | 0.673200000  | 0.126326000  | 0.042734000  |
| N | -0.662172000 | -0.064239000 | 0.127616000  |
| C | -1.361683000 | -0.868075000 | -0.779913000 |
| C | -1.453982000 | 0.559254000  | 1.098840000  |
| C | -2.822004000 | 0.061854000  | 0.798379000  |
| C | -5.159399000 | -0.275021000 | 0.937320000  |
| C | -5.104464000 | -1.116606000 | -0.167397000 |
| C | -4.010184000 | 0.330045000  | 1.439921000  |
| H | -6.014781000 | -1.571077000 | -0.535185000 |
| H | -4.047568000 | 0.987500000  | 2.297994000  |
| C | -3.897875000 | -1.382694000 | -0.809766000 |
| H | -3.849138000 | -2.036478000 | -1.670089000 |
| C | -2.767424000 | -0.779277000 | -0.306956000 |
| H | -6.112190000 | -0.087394000 | 1.414228000  |
| O | -1.053271000 | 1.305317000  | 1.944762000  |
| O | -0.872683000 | -1.459467000 | -1.698877000 |

### Thionocarbonate **2a** (trap-4)

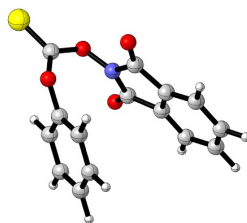

SCF Energy = -1330.85241438  
 Zero-point correction = 0.213856  
 Thermal correction to Energy = 0.230398  
 Thermal correction to Enthalpy = 0.231342  
 Thermal correction to Gibbs Free Energy = 0.167533  
 Sum of electronic and zero-point Energies = -1330.638558  
 Sum of electronic and thermal Energies = -1330.622017  
 Sum of electronic and thermal Enthalpies = -1330.621072  
 Sum of electronic and thermal Free Energies = -1330.684882

|   |              |              |              |
|---|--------------|--------------|--------------|
| S | -0.846479000 | -0.000077000 | 1.248460000  |
| C | -1.058102000 | 0.000083000  | -0.359354000 |
| O | -2.168121000 | 0.000154000  | -1.057324000 |
| C | -3.405119000 | 0.000052000  | -0.400669000 |
| C | -4.006814000 | 1.210742000  | -0.126297000 |
| C | -4.006762000 | -1.210734000 | -0.126622000 |
| C | -5.262981000 | 1.202526000  | 0.461412000  |
| C | -5.262929000 | -1.202734000 | 0.461091000  |
| C | -5.889472000 | -0.000158000 | 0.755533000  |
| H | -3.499901000 | 2.135885000  | -0.365400000 |
| H | -3.499807000 | -2.135791000 | -0.365970000 |
| H | -5.752329000 | 2.141119000  | 0.685627000  |
| H | -5.752231000 | -2.141410000 | 0.685057000  |
| H | -6.869850000 | -0.000240000 | 1.213440000  |
| O | -0.075227000 | 0.000203000  | -1.309836000 |
| N | 1.188304000  | 0.000129000  | -0.828908000 |
| C | 1.882667000  | -1.179747000 | -0.538920000 |
| C | 1.882695000  | 1.179891000  | -0.538622000 |
| C | 3.197908000  | 0.694834000  | -0.044617000 |
| C | 5.412479000  | 0.694817000  | 0.786506000  |
| C | 5.412480000  | -0.695100000 | 0.786285000  |

|   |             |              |              |
|---|-------------|--------------|--------------|
| C | 4.296479000 | 1.414987000  | 0.367760000  |
| H | 6.295044000 | -1.225546000 | 1.118318000  |
| H | 4.290604000 | 2.496642000  | 0.366260000  |
| C | 4.296478000 | -1.415138000 | 0.367315000  |
| H | 4.290598000 | -2.496793000 | 0.365483000  |
| C | 3.197904000 | -0.694855000 | -0.044830000 |
| H | 6.295044000 | 1.225158000  | 1.118706000  |
| O | 1.453379000 | 2.288554000  | -0.680476000 |
| O | 1.453334000 | -2.288349000 | -0.681160000 |

### Radical addition product (int-1)

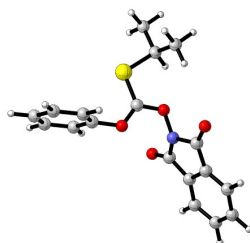

SCF Energy = -1449.34099197  
 Zero-point correction = 0.308018  
 Thermal correction to Energy = 0.329524  
 Thermal correction to Enthalpy = 0.330468  
 Thermal correction to Gibbs Free Energy = 0.254592  
 Sum of electronic and zero-point Energies = -1449.032974  
 Sum of electronic and thermal Energies = -1449.011468  
 Sum of electronic and thermal Enthalpies = -1449.010524  
 Sum of electronic and thermal Free Energies = -1449.086400

|   |              |              |              |
|---|--------------|--------------|--------------|
| S | -2.442580000 | 1.265843000  | -0.270964000 |
| C | -0.985323000 | 0.429986000  | -0.029059000 |
| O | -0.933514000 | -0.822929000 | 0.220835000  |
| C | -2.126532000 | -1.589108000 | 0.272198000  |
| C | -2.578405000 | -2.161677000 | -0.896911000 |
| C | -2.729990000 | -1.767082000 | 1.498006000  |
| C | -3.721219000 | -2.944319000 | -0.829101000 |
| C | -3.870412000 | -2.554782000 | 1.543669000  |
| C | -4.364576000 | -3.137327000 | 0.385308000  |
| H | -2.051268000 | -1.999809000 | -1.827290000 |
| H | -2.319421000 | -1.305063000 | 2.385276000  |
| H | -4.104510000 | -3.405593000 | -1.729123000 |
| H | -4.369011000 | -2.713224000 | 2.490265000  |
| H | -5.254823000 | -3.750511000 | 0.429891000  |
| O | 0.129799000  | 1.087059000  | -0.095523000 |
| N | 1.284652000  | 0.336990000  | 0.045563000  |
| C | 1.843047000  | -0.293526000 | -1.100653000 |
| C | 2.208388000  | 0.688638000  | 1.063399000  |
| C | 3.404195000  | 0.048305000  | 0.605458000  |
| C | 5.664142000  | -0.726780000 | 0.570609000  |
| C | 5.448560000  | -1.305786000 | -0.707455000 |
| C | 4.658160000  | -0.060096000 | 1.223680000  |
| H | 6.264463000  | -1.824206000 | -1.195330000 |
| H | 4.822842000  | 0.381496000  | 2.198932000  |
| C | 4.228644000  | -1.216970000 | -1.328531000 |
| H | 4.066112000  | -1.661422000 | -2.302825000 |
| C | 3.186452000  | -0.535622000 | -0.680377000 |
| H | 6.638734000  | -0.817519000 | 1.033381000  |
| O | 1.912069000  | 1.363938000  | 2.048068000  |
| O | 1.188733000  | -0.522638000 | -2.119126000 |
| C | -1.882319000 | 3.007974000  | -0.524382000 |
| H | -1.052026000 | 2.952104000  | -1.225828000 |
| C | -1.455921000 | 3.651056000  | 0.783678000  |
| C | -3.064425000 | 3.712733000  | -1.177686000 |
| H | -3.338106000 | 3.252083000  | -2.126339000 |
| H | -3.936460000 | 3.722057000  | -0.521113000 |

|   |              |             |              |
|---|--------------|-------------|--------------|
| H | -2.779667000 | 4.747510000 | -1.369060000 |
| H | -2.279972000 | 3.664721000 | 1.497967000  |
| H | -1.166016000 | 4.683088000 | 0.578900000  |
| H | -0.603642000 | 3.144728000 | 1.233636000  |

### Radical addition product (int-2)

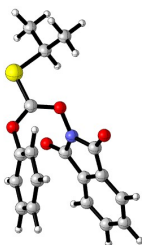

SCF Energy = -1449.33868209  
 Zero-point correction = 0.308246  
 Thermal correction to Energy = 0.329532  
 Thermal correction to Enthalpy = 0.330477  
 Thermal correction to Gibbs Free Energy = 0.256437  
 Sum of electronic and zero-point Energies = -1449.030436  
 Sum of electronic and thermal Energies = -1449.009150  
 Sum of electronic and thermal Enthalpies = -1449.008205  
 Sum of electronic and thermal Free Energies = -1449.082245

|   |              |              |              |
|---|--------------|--------------|--------------|
| S | -3.468108000 | -0.610378000 | -0.564896000 |
| C | -1.796697000 | -0.577443000 | -0.287934000 |
| O | -1.128129000 | -1.509884000 | -0.854948000 |
| C | 0.177971000  | -1.942147000 | -0.488372000 |
| C | 0.368104000  | -2.536591000 | 0.738862000  |
| C | 1.161980000  | -1.824488000 | -1.444893000 |
| C | 1.637618000  | -3.014452000 | 1.029887000  |
| C | 2.422771000  | -2.306273000 | -1.132280000 |
| C | 2.660356000  | -2.896807000 | 0.101163000  |
| H | -0.439671000 | -2.615978000 | 1.453248000  |
| H | 0.948369000  | -1.346860000 | -2.390582000 |
| H | 1.820885000  | -3.477427000 | 1.989927000  |
| H | 3.220249000  | -2.214616000 | -1.857182000 |
| H | 3.647971000  | -3.269649000 | 0.337758000  |
| O | -1.315679000 | 0.353346000  | 0.487876000  |
| N | 0.020877000  | 0.647983000  | 0.334182000  |
| C | 0.494220000  | 1.190433000  | -0.883291000 |
| C | 0.918927000  | 0.644712000  | 1.422175000  |
| C | 2.108166000  | 1.159149000  | 0.803115000  |
| C | 4.383764000  | 1.830962000  | 0.537157000  |
| C | 4.134639000  | 2.142185000  | -0.823027000 |
| C | 3.385426000  | 1.343820000  | 1.345337000  |
| H | 4.944893000  | 2.519603000  | -1.434265000 |
| H | 3.575862000  | 1.101550000  | 2.383605000  |
| C | 2.889127000  | 1.973117000  | -1.374258000 |
| H | 2.702833000  | 2.208618000  | -2.414776000 |
| C | 1.854067000  | 1.482231000  | -0.564259000 |
| H | 5.377602000  | 1.978884000  | 0.940291000  |
| O | 0.632110000  | 0.261311000  | 2.553763000  |
| O | -0.217947000 | 1.260600000  | -1.890806000 |
| C | -4.057949000 | 0.979505000  | 0.157451000  |
| H | -3.303515000 | 1.717191000  | -0.111075000 |
| C | -4.214675000 | 0.879911000  | 1.665333000  |
| C | -5.366160000 | 1.294230000  | -0.556982000 |
| H | -5.223705000 | 1.406757000  | -1.631080000 |
| H | -6.116796000 | 0.522640000  | -0.376292000 |
| H | -5.752895000 | 2.234088000  | -0.161957000 |
| H | -4.945577000 | 0.115393000  | 1.931839000  |
| H | -4.574084000 | 1.839433000  | 2.041245000  |
| H | -3.271605000 | 0.655234000  | 2.160190000  |

### Radical addition product (int-3)

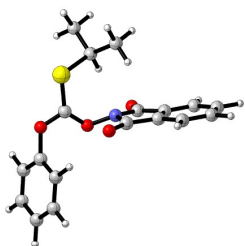

SCF Energy = -1449.33665754  
Zero-point correction = 0.307873  
Thermal correction to Energy = 0.329213  
Thermal correction to Enthalpy = 0.330157  
Thermal correction to Gibbs Free Energy = 0.255922  
Sum of electronic and zero-point Energies = -1449.028784  
Sum of electronic and thermal Energies = -1449.007444  
Sum of electronic and thermal Enthalpies = -1449.006500  
Sum of electronic and thermal Free Energies = -1449.080735

|   |              |              |              |
|---|--------------|--------------|--------------|
| S | 2.555049000  | -2.422477000 | 0.001473000  |
| C | 1.230512000  | -1.487727000 | 0.000490000  |
| O | 1.124343000  | -0.182147000 | -0.000332000 |
| C | 2.273025000  | 0.620969000  | -0.000409000 |
| C | 2.790686000  | 1.028370000  | -1.211865000 |
| C | 2.788874000  | 1.031037000  | 1.210917000  |
| C | 3.885484000  | 1.879545000  | -1.203568000 |
| C | 3.883690000  | 1.882197000  | 1.202358000  |
| C | 4.431029000  | 2.305217000  | -0.000662000 |
| H | 2.346381000  | 0.683496000  | -2.135821000 |
| H | 2.343177000  | 0.688233000  | 2.134973000  |
| H | 4.310092000  | 2.211877000  | -2.141599000 |
| H | 4.306899000  | 2.216638000  | 2.140274000  |
| H | 5.283506000  | 2.971723000  | -0.000755000 |
| O | 0.004444000  | -2.081805000 | 0.000411000  |
| N | -1.071714000 | -1.243599000 | 0.000194000  |
| C | -1.628490000 | -0.735348000 | -1.178627000 |
| C | -1.628194000 | -0.734528000 | 1.178792000  |
| C | -2.732059000 | 0.135303000  | 0.694921000  |
| C | -4.572574000 | 1.620249000  | 0.694618000  |
| C | -4.572830000 | 1.619670000  | -0.695312000 |
| C | -3.644882000 | 0.872258000  | 1.415282000  |
| H | -5.305319000 | 2.212955000  | -1.226376000 |
| H | -3.638679000 | 0.870717000  | 2.496905000  |
| C | -3.645400000 | 0.871089000  | -1.415700000 |
| H | -3.639578000 | 0.868681000  | -2.497324000 |
| C | -2.732297000 | 0.134741000  | -0.695070000 |
| H | -5.304874000 | 2.213966000  | 1.225462000  |
| O | -1.241481000 | -0.975336000 | 2.286204000  |
| O | -1.242286000 | -0.977177000 | -2.285990000 |

### Radical addition product (int-4)

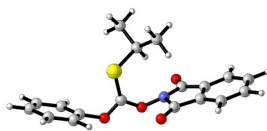

SCF Energy = -1449.33548132  
Zero-point correction = 0.307983  
Thermal correction to Energy = 0.329316  
Thermal correction to Enthalpy = 0.330260

Thermal correction to Gibbs Free Energy = 0.255642  
 Sum of electronic and zero-point Energies = -1449.027498  
 Sum of electronic and thermal Energies = -1449.006166  
 Sum of electronic and thermal Enthalpies = -1449.005221  
 Sum of electronic and thermal Free Energies = -1449.079840

|   |              |              |              |
|---|--------------|--------------|--------------|
| S | 1.285049000  | 0.832707000  | -0.751875000 |
| C | 1.089208000  | -0.142738000 | 0.623448000  |
| O | 2.072047000  | -0.821321000 | 1.100941000  |
| C | 3.368097000  | -0.723477000 | 0.538851000  |
| C | 4.247580000  | 0.188631000  | 1.081333000  |
| C | 3.699072000  | -1.591721000 | -0.478524000 |
| C | 5.526815000  | 0.244654000  | 0.550606000  |
| C | 4.984711000  | -1.520566000 | -0.994726000 |
| C | 5.892958000  | -0.604394000 | -0.484819000 |
| H | 3.937254000  | 0.838552000  | 1.888131000  |
| H | 2.972310000  | -2.299881000 | -0.853261000 |
| H | 6.238322000  | 0.954548000  | 0.950376000  |
| H | 5.273762000  | -2.188625000 | -1.794734000 |
| H | 6.893092000  | -0.553594000 | -0.894128000 |
| O | 0.035944000  | -0.291815000 | 1.380707000  |
| N | -1.176633000 | -0.217883000 | 0.726471000  |
| C | -1.580139000 | -1.327519000 | -0.068499000 |
| C | -2.229483000 | 0.568163000  | 1.255788000  |
| C | -3.371618000 | 0.015624000  | 0.594117000  |
| C | -5.634829000 | -0.270779000 | -0.113607000 |
| C | -5.251844000 | -1.392320000 | -0.894197000 |
| C | -4.711231000 | 0.429839000  | 0.620383000  |
| H | -6.006929000 | -1.922963000 | -1.460358000 |
| H | -5.004392000 | 1.286524000  | 1.214756000  |
| C | -3.946313000 | -1.810227000 | -0.941538000 |
| H | -3.655227000 | -2.664806000 | -1.539783000 |
| C | -2.985296000 | -1.111131000 | -0.194330000 |
| H | -6.674289000 | 0.031834000  | -0.100397000 |
| O | -2.050009000 | 1.503663000  | 2.036442000  |
| O | -0.773914000 | -2.157394000 | -0.491972000 |
| C | -0.058951000 | 2.113233000  | -0.711100000 |
| H | -0.490496000 | 2.086703000  | 0.286404000  |
| C | -1.098949000 | 1.834878000  | -1.781539000 |
| C | 0.655815000  | 3.443153000  | -0.917798000 |
| H | 1.373021000  | 3.645642000  | -0.123653000 |
| H | 1.171083000  | 3.479414000  | -1.879246000 |
| H | -0.098046000 | 4.231543000  | -0.911926000 |
| H | -0.654664000 | 1.879368000  | -2.777026000 |
| H | -1.868060000 | 2.606301000  | -1.719346000 |
| H | -1.577257000 | 0.866425000  | -1.653145000 |

### Thiocarbonate 3a (prod-1)

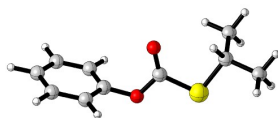

SCF Energy = -936.987832805  
 Zero-point correction = 0.202023  
 Thermal correction to Energy = 0.214912  
 Thermal correction to Enthalpy = 0.215856  
 Thermal correction to Gibbs Free Energy = 0.160918  
 Sum of electronic and zero-point Energies = -936.785810  
 Sum of electronic and thermal Energies = -936.772921  
 Sum of electronic and thermal Enthalpies = -936.771977  
 Sum of electronic and thermal Free Energies = -936.826915

|   |             |              |              |
|---|-------------|--------------|--------------|
| S | 2.023633000 | -0.589212000 | -0.740011000 |
|---|-------------|--------------|--------------|

|   |              |              |              |
|---|--------------|--------------|--------------|
| C | 0.511805000  | -0.073156000 | -0.001543000 |
| O | -0.499888000 | -0.459026000 | -0.803467000 |
| C | -1.802273000 | -0.206883000 | -0.369030000 |
| C | -2.381285000 | 1.020428000  | -0.629243000 |
| C | -2.496934000 | -1.224239000 | 0.256385000  |
| C | -3.697288000 | 1.232374000  | -0.246675000 |
| C | -3.813222000 | -1.001415000 | 0.632739000  |
| C | -4.413471000 | 0.224435000  | 0.383979000  |
| H | -1.807917000 | 1.793464000  | -1.123619000 |
| H | -2.011238000 | -2.173512000 | 0.439559000  |
| H | -4.163099000 | 2.189334000  | -0.442800000 |
| H | -4.369021000 | -1.790580000 | 1.122321000  |
| H | -5.441102000 | 0.394040000  | 0.677776000  |
| O | 0.380206000  | 0.506564000  | 1.037700000  |
| C | 3.226602000  | 0.085458000  | 0.460163000  |
| H | 2.792648000  | -0.102117000 | 1.441646000  |
| C | 3.435931000  | 1.578772000  | 0.263749000  |
| C | 4.518588000  | -0.707328000 | 0.308797000  |
| H | 4.361142000  | -1.771124000 | 0.486923000  |
| H | 4.948236000  | -0.581035000 | -0.687422000 |
| H | 5.247345000  | -0.342052000 | 1.034043000  |
| H | 3.850610000  | 1.784050000  | -0.724976000 |
| H | 4.139752000  | 1.948856000  | 1.012649000  |
| H | 2.501259000  | 2.127081000  | 0.374282000  |

### Thiocarbonate 3a (prod-2)

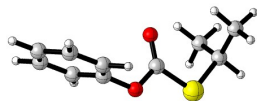

SCF Energy = -936.986112546  
 Zero-point correction = 0.201514  
 Thermal correction to Energy = 0.214630  
 Thermal correction to Enthalpy = 0.215575  
 Thermal correction to Gibbs Free Energy = 0.159972  
 Sum of electronic and zero-point Energies = -936.784598  
 Sum of electronic and thermal Energies = -936.771482  
 Sum of electronic and thermal Enthalpies = -936.770538  
 Sum of electronic and thermal Free Energies = -936.826140

|   |              |              |              |
|---|--------------|--------------|--------------|
| S | 2.063632000  | -0.197979000 | -1.162051000 |
| C | 0.611952000  | -0.038642000 | -0.179469000 |
| O | -0.448771000 | -0.185190000 | -1.001577000 |
| C | -1.720893000 | -0.078081000 | -0.438800000 |
| C | -2.300962000 | 1.169891000  | -0.314362000 |
| C | -2.389403000 | -1.232414000 | -0.079493000 |
| C | -3.588777000 | 1.261350000  | 0.191576000  |
| C | -3.678078000 | -1.128958000 | 0.423798000  |
| C | -4.277656000 | 0.114573000  | 0.561387000  |
| H | -1.748816000 | 2.052435000  | -0.609451000 |
| H | -1.904923000 | -2.192887000 | -0.194941000 |
| H | -4.054154000 | 2.232781000  | 0.296335000  |
| H | -4.212903000 | -2.025644000 | 0.709019000  |
| H | -5.282138000 | 0.191081000  | 0.956808000  |
| O | 0.536892000  | 0.161703000  | 0.998276000  |
| C | 3.424934000  | 0.006508000  | 0.042341000  |
| H | 4.277182000  | -0.098972000 | -0.634632000 |
| C | 3.482647000  | -1.114294000 | 1.070762000  |
| C | 3.469721000  | 1.396940000  | 0.660901000  |
| H | 3.458958000  | 2.171524000  | -0.105634000 |
| H | 2.626852000  | 1.553473000  | 1.332524000  |
| H | 4.390907000  | 1.499981000  | 1.238187000  |
| H | 2.637649000  | -1.061317000 | 1.755891000  |

|   |             |              |             |
|---|-------------|--------------|-------------|
| H | 4.401171000 | -1.015729000 | 1.653114000 |
| H | 3.486240000 | -2.092412000 | 0.590153000 |

### Thiocarbonate 3a (prod-3)

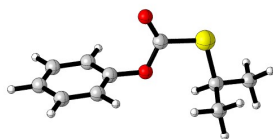

SCF Energy = -936.985621741  
 Zero-point correction = 0.201498  
 Thermal correction to Energy = 0.214563  
 Thermal correction to Enthalpy = 0.215508  
 Thermal correction to Gibbs Free Energy = 0.159507  
 Sum of electronic and zero-point Energies = -936.784124  
 Sum of electronic and thermal Energies = -936.771058  
 Sum of electronic and thermal Enthalpies = -936.770114  
 Sum of electronic and thermal Free Energies = -936.826114

|   |              |              |              |
|---|--------------|--------------|--------------|
| S | 2.271696000  | -0.953395000 | -0.415308000 |
| C | 0.516896000  | -0.962755000 | -0.514768000 |
| O | -0.064235000 | 0.057745000  | 0.138212000  |
| C | -1.458445000 | 0.122739000  | 0.139507000  |
| C | -2.174215000 | -0.634706000 | 1.047070000  |
| C | -2.075839000 | 1.005250000  | -0.724886000 |
| C | -3.553924000 | -0.502993000 | 1.083789000  |
| C | -3.456708000 | 1.130889000  | -0.676429000 |
| C | -4.195892000 | 0.377936000  | 0.224340000  |
| H | -1.655772000 | -1.313132000 | 1.711612000  |
| H | -1.480074000 | 1.585012000  | -1.417402000 |
| H | -4.128189000 | -1.091489000 | 1.787438000  |
| H | -3.954140000 | 1.820109000  | -1.346326000 |
| H | -5.272634000 | 0.480252000  | 0.259873000  |
| O | -0.072002000 | -1.822949000 | -1.107193000 |
| C | 2.703290000  | 0.578098000  | 0.495382000  |
| H | 2.000169000  | 0.647438000  | 1.323214000  |
| C | 2.597404000  | 1.810090000  | -0.389644000 |
| C | 4.112655000  | 0.380922000  | 1.041125000  |
| H | 4.166839000  | -0.471946000 | 1.717658000  |
| H | 4.833873000  | 0.232409000  | 0.234334000  |
| H | 4.409038000  | 1.275445000  | 1.591242000  |
| H | 3.299083000  | 1.747030000  | -1.223461000 |
| H | 2.841920000  | 2.700165000  | 0.194649000  |
| H | 1.591310000  | 1.931838000  | -0.788979000 |

### Thiocarbonate 3a (prod-4)

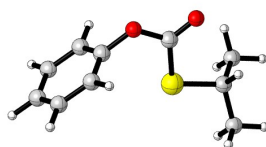

SCF Energy = -936.985508791  
 Zero-point correction = 0.201635  
 Thermal correction to Energy = 0.214567  
 Thermal correction to Enthalpy = 0.215511  
 Thermal correction to Gibbs Free Energy = 0.160712  
 Sum of electronic and zero-point Energies = -936.783873  
 Sum of electronic and thermal Energies = -936.770942

Sum of electronic and thermal Enthalpies = -936.769998  
Sum of electronic and thermal Free Energies = -936.824797

|   |              |              |              |
|---|--------------|--------------|--------------|
| S | -1.020642000 | -0.463198000 | -0.074209000 |
| C | -0.707256000 | 1.263776000  | -0.294468000 |
| O | 0.592200000  | 1.621206000  | -0.267324000 |
| C | 1.600606000  | 0.678943000  | -0.088683000 |
| C | 2.150585000  | 0.063668000  | -1.198825000 |
| C | 2.074884000  | 0.438410000  | 1.188242000  |
| C | 3.191522000  | -0.834209000 | -1.018701000 |
| C | 3.117360000  | -0.460369000 | 1.355344000  |
| C | 3.674128000  | -1.097840000 | 0.255533000  |
| H | 1.760094000  | 0.283744000  | -2.183610000 |
| H | 1.626614000  | 0.945348000  | 2.032467000  |
| H | 3.628194000  | -1.324919000 | -1.878666000 |
| H | 3.497016000  | -0.659137000 | 2.349055000  |
| H | 4.486646000  | -1.799679000 | 0.391181000  |
| O | -1.544487000 | 2.102074000  | -0.465493000 |
| C | -2.848622000 | -0.468014000 | -0.136177000 |
| H | -3.117603000 | 0.207504000  | -0.947061000 |
| C | -3.456023000 | 0.019829000  | 1.169414000  |
| C | -3.277286000 | -1.888750000 | -0.481506000 |
| H | -2.862618000 | -2.214109000 | -1.435734000 |
| H | -2.966784000 | -2.595765000 | 0.290788000  |
| H | -4.365614000 | -1.925981000 | -0.549660000 |
| H | -3.174282000 | -0.635409000 | 1.995823000  |
| H | -4.545166000 | 0.015141000  | 1.085430000  |
| H | -3.137315000 | 1.035513000  | 1.398842000  |

### Transition state of C-S bond formation (TS-1)

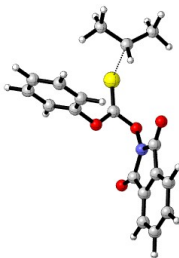

SCF Energy = -1449.33996447  
Zero-point correction = 0.305315  
Thermal correction to Energy = 0.327241  
Thermal correction to Enthalpy = 0.328186  
Thermal correction to Gibbs Free Energy = 0.250065  
Sum of electronic and zero-point Energies = -1449.034649  
Sum of electronic and thermal Energies = -1449.012723  
Sum of electronic and thermal Enthalpies = -1449.011779  
Sum of electronic and thermal Free Energies = -1449.089899

|   |              |              |              |
|---|--------------|--------------|--------------|
| S | -2.273050000 | -1.308572000 | 1.300803000  |
| C | -0.809627000 | -0.628885000 | 1.172512000  |
| O | -0.480522000 | 0.618969000  | 0.836551000  |
| C | -3.182245000 | -1.808783000 | -0.973135000 |
| H | -2.317232000 | -1.398763000 | -1.483673000 |
| O | 0.323485000  | -1.393854000 | 1.368135000  |
| N | 1.454783000  | -0.922628000 | 0.774717000  |
| C | 2.446537000  | -0.228774000 | 1.473353000  |
| C | 1.669981000  | -1.016591000 | -0.600429000 |
| C | 2.999276000  | -0.382701000 | -0.797703000 |
| C | 3.460096000  | 0.081548000  | 0.428053000  |
| O | 0.901266000  | -1.494022000 | -1.388353000 |
| O | 2.425637000  | 0.027379000  | 2.643284000  |
| C | -1.456648000 | 1.456226000  | 0.301911000  |
| C | -2.227158000 | 2.229274000  | 1.147157000  |



|   |              |              |              |
|---|--------------|--------------|--------------|
| C | -1.574301000 | 1.525790000  | -1.072614000 |
| C | -3.156640000 | 3.095121000  | 0.591069000  |
| C | -2.506336000 | 2.397175000  | -1.616130000 |
| C | -3.298236000 | 3.178879000  | -0.787309000 |
| H | -2.101281000 | 2.145348000  | 2.218093000  |
| H | -0.946693000 | 0.904465000  | -1.698187000 |
| H | -3.771685000 | 3.706137000  | 1.238610000  |
| H | -2.613639000 | 2.463215000  | -2.690920000 |
| H | -4.024799000 | 3.857126000  | -1.215203000 |
| C | 3.733162000  | -0.225063000 | -1.951560000 |
| H | 3.367650000  | -0.589109000 | -2.902308000 |
| C | 4.963034000  | 0.419363000  | -1.842725000 |
| H | 5.569098000  | 0.562610000  | -2.727469000 |
| C | 5.424732000  | 0.883820000  | -0.616976000 |
| H | 6.383983000  | 1.381486000  | -0.564743000 |
| C | 4.673828000  | 0.720484000  | 0.544996000  |
| H | 5.028477000  | 1.082665000  | 1.500585000  |
| C | -3.312357000 | -3.293513000 | -0.988464000 |
| H | -3.717195000 | -3.632731000 | -1.951986000 |
| H | -2.350688000 | -3.785686000 | -0.842984000 |
| H | -4.003031000 | -3.640284000 | -0.215435000 |
| C | -4.418087000 | -0.976268000 | -0.999572000 |
| H | -4.919229000 | -1.067106000 | -1.972938000 |
| H | -5.134163000 | -1.303589000 | -0.241287000 |
| H | -4.197251000 | 0.079382000  | -0.837557000 |

### Transition state of N–O bond cleavage (TS-2)

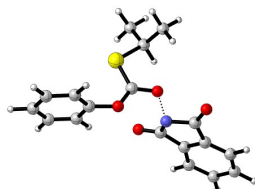

SCF Energy = -1449.33070852  
 Zero-point correction = 0.304736  
 Thermal correction to Energy = 0.326166  
 Thermal correction to Enthalpy = 0.327111  
 Thermal correction to Gibbs Free Energy = 0.251265  
 Sum of electronic and zero-point Energies = -1449.025972  
 Sum of electronic and thermal Energies = -1449.004542  
 Sum of electronic and thermal Enthalpies = -1449.003598  
 Sum of electronic and thermal Free Energies = -1449.079444

|   |              |              |              |
|---|--------------|--------------|--------------|
| S | -2.105388000 | 1.517017000  | -0.284028000 |
| C | -0.990695000 | 0.470430000  | 0.488100000  |
| O | -1.346238000 | -0.699846000 | 0.908048000  |
| C | -2.573720000 | -1.260960000 | 0.502760000  |
| C | -2.628448000 | -1.884869000 | -0.727019000 |
| C | -3.634409000 | -1.220591000 | 1.382268000  |
| C | -3.822981000 | -2.483078000 | -1.096126000 |
| C | -4.820450000 | -1.827928000 | 0.995469000  |
| C | -4.915151000 | -2.454147000 | -0.238875000 |
| H | -1.751727000 | -1.890827000 | -1.362199000 |
| H | -3.531968000 | -0.730489000 | 2.340862000  |
| H | -3.897481000 | -2.977393000 | -2.055512000 |
| H | -5.669358000 | -1.812388000 | 1.665927000  |
| H | -5.842896000 | -2.927215000 | -0.532491000 |
| O | 0.199439000  | 0.864778000  | 0.721140000  |
| N | 1.219695000  | -0.278614000 | 0.729316000  |
| C | 1.529515000  | -0.668099000 | -0.605175000 |
| C | 2.396681000  | 0.164915000  | 1.423440000  |
| C | 3.494274000  | -0.337066000 | 0.609926000  |
| C | 5.697298000  | -0.870562000 | -0.107169000 |

|   |              |              |              |
|---|--------------|--------------|--------------|
| C | 5.165693000  | -1.370759000 | -1.311324000 |
| C | 4.856445000  | -0.349768000 | 0.861273000  |
| H | 5.844895000  | -1.777001000 | -2.051207000 |
| H | 5.246000000  | 0.028568000  | 1.798185000  |
| C | 3.814429000  | -1.352143000 | -1.578138000 |
| H | 3.422690000  | -1.738639000 | -2.509814000 |
| C | 2.954484000  | -0.798040000 | -0.615061000 |
| H | 6.765099000  | -0.907439000 | 0.061608000  |
| O | 2.373951000  | 0.827271000  | 2.431815000  |
| O | 0.639199000  | -0.888979000 | -1.442557000 |
| C | -1.041944000 | 2.943476000  | -0.753865000 |
| H | -0.120824000 | 2.501636000  | -1.130845000 |
| C | -0.762379000 | 3.856971000  | 0.427158000  |
| C | -1.775835000 | 3.651632000  | -1.885626000 |
| H | -1.943667000 | 2.990618000  | -2.735368000 |
| H | -2.735742000 | 4.048997000  | -1.550271000 |
| H | -1.164841000 | 4.491137000  | -2.218881000 |
| H | -1.687780000 | 4.284009000  | 0.816320000  |
| H | -0.123928000 | 4.675862000  | 0.090577000  |
| H | -0.247772000 | 3.336324000  | 1.232682000  |

### Phthalimide radical

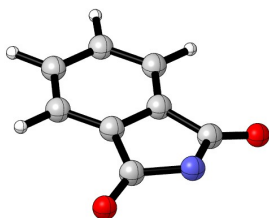

SCF Energy = -512.420865198  
 Zero-point correction = 0.102858  
 Thermal correction to Energy = 0.110743  
 Thermal correction to Enthalpy = 0.111688  
 Thermal correction to Gibbs Free Energy = 0.068888  
 Sum of electronic and zero-point Energies = -512.318007  
 Sum of electronic and thermal Energies = -512.310122  
 Sum of electronic and thermal Enthalpies = -512.309178  
 Sum of electronic and thermal Free Energies = -512.351977

|   |              |              |              |
|---|--------------|--------------|--------------|
| N | 2.073722000  | -0.000005000 | 0.266673000  |
| C | 1.267772000  | -1.144971000 | 0.014126000  |
| C | 1.267767000  | 1.144998000  | 0.014283000  |
| C | -0.144978000 | 0.695017000  | 0.010389000  |
| C | -2.506914000 | 0.699145000  | 0.000966000  |
| C | -2.506912000 | -0.699148000 | 0.000994000  |
| C | -1.322626000 | 1.419816000  | 0.009191000  |
| H | -3.452613000 | -1.224710000 | -0.006719000 |
| H | -1.317394000 | 2.501320000  | 0.011506000  |
| C | -1.322620000 | -1.419814000 | 0.009236000  |
| H | -1.317382000 | -2.501319000 | 0.011548000  |
| C | -0.144976000 | -0.695008000 | 0.010389000  |
| H | -3.452618000 | 1.224702000  | -0.006757000 |
| O | 1.719061000  | 2.246967000  | -0.143421000 |
| O | 1.719048000  | -2.246988000 | -0.143295000 |

### Geometry of phthalimide radical – single point as anion

SCF Energy = -512.620446148  
 Zero-point correction = 0.103593  
 Thermal correction to Energy = 0.111307  
 Thermal correction to Enthalpy = 0.112251  
 Thermal correction to Gibbs Free Energy = 0.070500  
 Sum of electronic and zero-point Energies = -512.516853

Sum of electronic and thermal Energies = -512.509139  
Sum of electronic and thermal Enthalpies = -512.508195  
Sum of electronic and thermal Free Energies = -512.549946

### Phthalimide anion

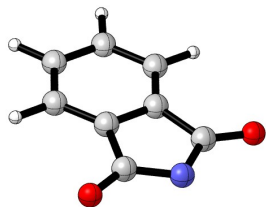

SCF Energy = -512.635818148  
Zero-point correction = 0.104258  
Thermal correction to Energy = 0.111679  
Thermal correction to Enthalpy = 0.112624  
Thermal correction to Gibbs Free Energy = 0.071709  
Sum of electronic and zero-point Energies = -512.531560  
Sum of electronic and thermal Energies = -512.524139  
Sum of electronic and thermal Enthalpies = -512.523195  
Sum of electronic and thermal Free Energies = -512.564109

|   |              |              |              |
|---|--------------|--------------|--------------|
| N | -2.100425000 | 0.000000000  | 0.000050000  |
| C | -1.308627000 | -1.104917000 | -0.000040000 |
| C | -1.308628000 | 1.104917000  | -0.000059000 |
| C | 0.145778000  | 0.690247000  | -0.000057000 |
| C | 2.516523000  | 0.695352000  | -0.000006000 |
| C | 2.516523000  | -0.695352000 | -0.000007000 |
| C | 1.319430000  | 1.411676000  | -0.000048000 |
| H | 3.460726000  | -1.226048000 | 0.000019000  |
| H | 1.314655000  | 2.494769000  | -0.000035000 |
| C | 1.319431000  | -1.411676000 | -0.000049000 |
| H | 1.314655000  | -2.494769000 | -0.000032000 |
| C | 0.145778000  | -0.690247000 | -0.000056000 |
| H | 3.460725000  | 1.226049000  | 0.000020000  |
| O | -1.682815000 | 2.272678000  | 0.000109000  |
| O | -1.682814000 | -2.272678000 | 0.000092000  |

### Geometry of phthalimide anion – single point as radical

SCF Energy = -512.390909326  
Zero-point correction = 0.100694  
Thermal correction to Energy = 0.108069  
Thermal correction to Enthalpy = 0.109013  
Thermal correction to Gibbs Free Energy = 0.067590  
Sum of electronic and zero-point Energies = -512.290215  
Sum of electronic and thermal Energies = -512.282841  
Sum of electronic and thermal Enthalpies = -512.281896  
Sum of electronic and thermal Free Energies = -512.323319

### Phthalimide

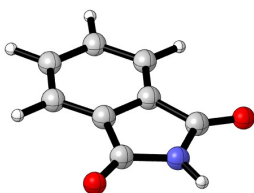

SCF Energy = -513.126102463  
 Zero-point correction = 0.117364  
 Thermal correction to Energy = 0.125088  
 Thermal correction to Enthalpy = 0.126032  
 Thermal correction to Gibbs Free Energy = 0.084577  
 Sum of electronic and zero-point Energies = -513.008738  
 Sum of electronic and thermal Energies = -513.001014  
 Sum of electronic and thermal Enthalpies = -513.000070  
 Sum of electronic and thermal Free Energies = -513.041526

|   |              |              |              |
|---|--------------|--------------|--------------|
| C | 1.237520000  | 1.158744000  | 0.000113000  |
| C | 1.237527000  | -1.158737000 | 0.000125000  |
| C | -0.178857000 | -0.693349000 | 0.000051000  |
| C | -2.543819000 | -0.695642000 | -0.000054000 |
| C | -2.543818000 | 0.695612000  | -0.000052000 |
| C | -1.352209000 | -1.415203000 | -0.000009000 |
| H | -3.487406000 | 1.225296000  | -0.000093000 |
| H | -1.346374000 | -2.497126000 | -0.000011000 |
| C | -1.352201000 | 1.415166000  | -0.000006000 |
| H | -1.346341000 | 2.497089000  | -0.000009000 |
| C | -0.178864000 | 0.693298000  | 0.000051000  |
| H | -3.487405000 | -1.225328000 | -0.000094000 |
| O | 1.668481000  | -2.282426000 | -0.000057000 |
| O | 1.668352000  | 2.282487000  | -0.000059000 |
| N | 2.001762000  | 0.000039000  | -0.000003000 |
| H | 3.008856000  | -0.000030000 | -0.000157000 |

### Acridine-phthalimide adduct (**Int-2**)

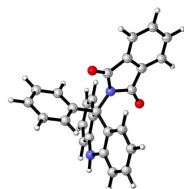

SCF Energy = -1299.74981651  
 Zero-point correction = 0.385884  
 Thermal correction to Energy = 0.408494  
 Thermal correction to Enthalpy = 0.409439  
 Thermal correction to Gibbs Free Energy = 0.333460  
 Sum of electronic and zero-point Energies = -1299.363933  
 Sum of electronic and thermal Energies = -1299.341322  
 Sum of electronic and thermal Enthalpies = -1299.340378  
 Sum of electronic and thermal Free Energies = -1299.416356

|   |              |              |              |
|---|--------------|--------------|--------------|
| C | 1.795865000  | -1.147968000 | -0.208639000 |
| C | 1.653230000  | 1.117228000  | 0.226930000  |
| C | 3.088614000  | 0.748040000  | 0.185405000  |
| C | 5.446641000  | 0.898494000  | 0.220759000  |
| C | 5.533087000  | -0.467236000 | -0.036118000 |
| C | 4.213268000  | 1.531650000  | 0.333468000  |
| H | 6.507532000  | -0.929876000 | -0.121983000 |
| H | 4.136764000  | 2.593385000  | 0.526053000  |
| C | 4.389081000  | -1.244106000 | -0.189733000 |
| H | 4.449401000  | -2.304524000 | -0.395247000 |
| C | 3.173906000  | -0.604951000 | -0.069453000 |
| H | 6.356103000  | 1.474333000  | 0.331556000  |
| O | 1.178336000  | 2.214433000  | 0.345064000  |
| O | 1.494237000  | -2.264865000 | -0.531378000 |
| N | 0.926697000  | -0.079154000 | 0.070918000  |
| C | -1.115896000 | 0.654425000  | 1.223527000  |
| C | -2.362707000 | 1.267810000  | 1.108485000  |
| N | -2.979433000 | 1.343433000  | -0.132130000 |
| C | -2.218304000 | 1.302223000  | -1.289290000 |

|   |              |              |              |
|---|--------------|--------------|--------------|
| C | -0.974639000 | 0.671197000  | -1.268344000 |
| C | -2.982173000 | 1.808278000  | 2.234845000  |
| H | -3.950245000 | 2.283857000  | 2.131206000  |
| C | -2.359626000 | 1.751859000  | 3.465967000  |
| C | -0.496517000 | 0.631072000  | 2.465635000  |
| H | 0.480142000  | 0.173885000  | 2.564467000  |
| C | -1.103981000 | 1.170651000  | 3.585421000  |
| C | -0.218332000 | 0.646309000  | -2.431666000 |
| H | 0.744199000  | 0.150745000  | -2.434173000 |
| C | -0.681372000 | 1.217339000  | -3.604827000 |
| C | -2.691255000 | 1.875720000  | -2.468755000 |
| H | -3.657458000 | 2.366148000  | -2.471327000 |
| C | -1.928414000 | 1.827780000  | -3.619514000 |
| H | -0.603281000 | 1.134730000  | 4.543661000  |
| H | -2.848895000 | 2.177030000  | 4.332990000  |
| H | -2.306201000 | 2.277050000  | -4.529072000 |
| H | -0.077797000 | 1.179184000  | -4.501714000 |
| C | -1.128634000 | -1.498764000 | 0.015794000  |
| C | -1.790951000 | -2.028901000 | -1.081671000 |
| C | -1.039731000 | -2.269253000 | 1.172399000  |
| C | -2.339880000 | -3.304163000 | -1.030990000 |
| C | -1.577655000 | -3.541589000 | 1.223546000  |
| C | -2.234667000 | -4.066916000 | 0.118502000  |
| H | -1.882028000 | -1.455914000 | -1.993690000 |
| H | -0.538558000 | -1.878255000 | 2.047180000  |
| H | -2.851996000 | -3.697403000 | -1.900184000 |
| H | -1.488535000 | -4.123154000 | 2.132476000  |
| H | -2.665328000 | -5.059358000 | 0.159263000  |
| H | -3.823067000 | 1.889994000  | -0.174552000 |
| C | -0.547653000 | -0.062619000 | -0.003002000 |

## 9-Phenylacridine

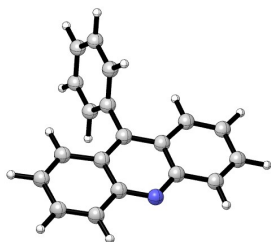

SCF Energy = -786.620241889  
 Zero-point correction = 0.265304  
 Thermal correction to Energy = 0.279419  
 Thermal correction to Enthalpy = 0.280363  
 Thermal correction to Gibbs Free Energy = 0.223416  
 Sum of electronic and zero-point Energies = -786.354938  
 Sum of electronic and thermal Energies = -786.340823  
 Sum of electronic and thermal Enthalpies = -786.339879  
 Sum of electronic and thermal Free Energies = -786.396826

|   |              |              |              |
|---|--------------|--------------|--------------|
| C | 0.000000000  | 0.000000000  | -0.132122000 |
| C | -0.007204000 | 1.203942000  | 0.580281000  |
| C | -0.010006000 | 1.145817000  | 2.009030000  |
| N | 0.000000000  | 0.000000000  | 2.691085000  |
| C | 0.010006000  | -1.145817000 | 2.009030000  |
| C | 0.007204000  | -1.203942000 | 0.580281000  |
| C | -0.020368000 | 2.367969000  | 2.745793000  |
| H | -0.026453000 | 2.300661000  | 3.826153000  |
| C | -0.020723000 | 3.564103000  | 2.105727000  |
| C | 0.000000000  | 2.483847000  | -0.051870000 |
| H | 0.014016000  | 2.534319000  | -1.132563000 |
| C | -0.007111000 | 3.623515000  | 0.685480000  |
| C | 0.000000000  | -2.483847000 | -0.051870000 |
| H | -0.014016000 | -2.534319000 | -1.132563000 |
| C | 0.007111000  | -3.623515000 | 0.685480000  |

|   |              |              |              |
|---|--------------|--------------|--------------|
| C | 0.020368000  | -2.367969000 | 2.745793000  |
| H | 0.026453000  | -2.300661000 | 3.826153000  |
| C | 0.020723000  | -3.564103000 | 2.105727000  |
| H | -0.000067000 | 4.587616000  | 0.193730000  |
| H | -0.028045000 | 4.485366000  | 2.674546000  |
| H | 0.028045000  | -4.485366000 | 2.674546000  |
| H | 0.000067000  | -4.587616000 | 0.193730000  |
| C | 0.000000000  | 0.000000000  | -1.619242000 |
| C | 1.179158000  | -0.224671000 | -2.322332000 |
| C | -1.179158000 | 0.224671000  | -2.322332000 |
| C | 1.179183000  | -0.222870000 | -3.709187000 |
| C | -1.179183000 | 0.222870000  | -3.709187000 |
| C | 0.000000000  | 0.000000000  | -4.405078000 |
| H | 2.099976000  | -0.400503000 | -1.779675000 |
| H | -2.099976000 | 0.400503000  | -1.779675000 |
| H | 2.103627000  | -0.395777000 | -4.245338000 |
| H | -2.103627000 | 0.395777000  | -4.245338000 |
| H | 0.000000000  | 0.000000000  | -5.487694000 |

### 9-Phenylacridine (triplet)

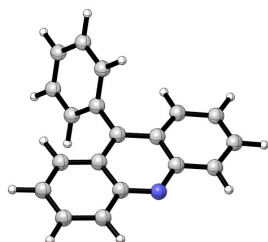

SCF Energy = -786.546464499  
 Zero-point correction = 0.261560  
 Thermal correction to Energy = 0.275929  
 Thermal correction to Enthalpy = 0.276873  
 Thermal correction to Gibbs Free Energy = 0.219023  
 Sum of electronic and zero-point Energies = -786.284905  
 Sum of electronic and thermal Energies = -786.270536  
 Sum of electronic and thermal Enthalpies = -786.269592  
 Sum of electronic and thermal Free Energies = -786.327442

|   |              |              |              |
|---|--------------|--------------|--------------|
| C | 0.000000000  | 0.000000000  | -0.165139000 |
| C | -0.023574000 | 1.236068000  | 0.576053000  |
| C | -0.032439000 | 1.173638000  | 2.005981000  |
| N | 0.000000000  | 0.000000000  | 2.702801000  |
| C | 0.032439000  | -1.173638000 | 2.005981000  |
| C | 0.023574000  | -1.236068000 | 0.576053000  |
| C | -0.055759000 | 2.352150000  | 2.743356000  |
| H | -0.065664000 | 2.272824000  | 3.822952000  |
| C | -0.057727000 | 3.604327000  | 2.114482000  |
| C | 0.000000000  | 2.486408000  | -0.020525000 |
| H | 0.043518000  | 2.564598000  | -1.098461000 |
| C | -0.023607000 | 3.667887000  | 0.744421000  |
| C | 0.000000000  | -2.486408000 | -0.020525000 |
| H | -0.043518000 | -2.564598000 | -1.098461000 |
| C | 0.023607000  | -3.667887000 | 0.744421000  |
| C | 0.055759000  | -2.352150000 | 2.743356000  |
| H | 0.065664000  | -2.272824000 | 3.822952000  |
| C | 0.057727000  | -3.604327000 | 2.114482000  |
| H | -0.011940000 | 4.624857000  | 0.239104000  |
| H | -0.077405000 | 4.507830000  | 2.709443000  |
| H | 0.077405000  | -4.507830000 | 2.709443000  |
| H | 0.011940000  | -4.624857000 | 0.239104000  |
| C | 0.000000000  | 0.000000000  | -1.638909000 |
| C | 1.070057000  | -0.542251000 | -2.352754000 |
| C | -1.070057000 | 0.542251000  | -2.352754000 |
| C | 1.071517000  | -0.539224000 | -3.738623000 |
| C | -1.071517000 | 0.539224000  | -3.738623000 |

|   |              |              |              |
|---|--------------|--------------|--------------|
| C | 0.000000000  | 0.000000000  | -4.435933000 |
| H | 1.910754000  | -0.961343000 | -1.813646000 |
| H | -1.910754000 | 0.961343000  | -1.813646000 |
| H | 1.914062000  | -0.957932000 | -4.274315000 |
| H | -1.914062000 | 0.957932000  | -4.274315000 |
| H | 0.000000000  | 0.000000000  | -5.518562000 |

## 9-Phenylacridine-H radical

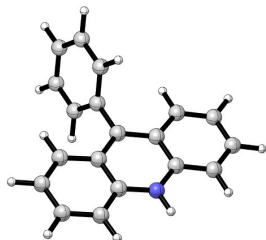

SCF Energy = -787.215901161  
 Zero-point correction = 0.275672  
 Thermal correction to Energy = 0.290259  
 Thermal correction to Enthalpy = 0.291203  
 Thermal correction to Gibbs Free Energy = 0.233053  
 Sum of electronic and zero-point Energies = -786.940229  
 Sum of electronic and thermal Energies = -786.925642  
 Sum of electronic and thermal Enthalpies = -786.924698  
 Sum of electronic and thermal Free Energies = -786.982848

|   |              |              |              |
|---|--------------|--------------|--------------|
| C | 0.000000000  | 0.000000000  | -0.153137000 |
| C | -0.011261000 | 1.233888000  | 0.562831000  |
| C | -0.013944000 | 1.214650000  | 1.979935000  |
| N | 0.000000000  | 0.000000000  | 2.624236000  |
| C | 0.013944000  | -1.214650000 | 1.979935000  |
| C | 0.011261000  | -1.233888000 | 0.562831000  |
| C | -0.024588000 | 2.398015000  | 2.711183000  |
| H | -0.030021000 | 2.352393000  | 3.794062000  |
| C | -0.024786000 | 3.619931000  | 2.061615000  |
| C | 0.000000000  | 2.496950000  | -0.061811000 |
| H | 0.018298000  | 2.542297000  | -1.142586000 |
| C | -0.008761000 | 3.666524000  | 0.669854000  |
| C | 0.000000000  | -2.496950000 | -0.061811000 |
| H | -0.018298000 | -2.542297000 | -1.142586000 |
| C | 0.008761000  | -3.666524000 | 0.669854000  |
| C | 0.024588000  | -2.398015000 | 2.711183000  |
| H | 0.030021000  | -2.352393000 | 3.794062000  |
| C | 0.024786000  | -3.619931000 | 2.061615000  |
| H | -0.000176000 | 4.620658000  | 0.158955000  |
| H | -0.032850000 | 4.535188000  | 2.639220000  |
| H | 0.032850000  | -4.535188000 | 2.639220000  |
| H | 0.000176000  | -4.620658000 | 0.158955000  |
| C | 0.000000000  | 0.000000000  | -1.635622000 |
| C | 1.145655000  | -0.349924000 | -2.347726000 |
| C | -1.145655000 | 0.349924000  | -2.347726000 |
| C | 1.147060000  | -0.350031000 | -3.734545000 |
| C | -1.147060000 | 0.350031000  | -3.734545000 |
| C | 0.000000000  | 0.000000000  | -4.432360000 |
| H | 2.043061000  | -0.623714000 | -1.805768000 |
| H | -2.043061000 | 0.623714000  | -1.805768000 |
| H | 2.047692000  | -0.621893000 | -4.270862000 |
| H | -2.047692000 | 0.621893000  | -4.270862000 |
| H | 0.000000000  | 0.000000000  | -5.515112000 |
| H | 0.000000000  | 0.000000000  | 3.630106000  |

## 9-Phenylacridine-H radical geometry – single point as cation

SCF Energy = -787.066235309  
Zero-point correction = 0.278386  
Thermal correction to Energy = 0.291803  
Thermal correction to Enthalpy = 0.292747  
Thermal correction to Gibbs Free Energy = 0.237176  
Sum of electronic and zero-point Energies = -786.787849  
Sum of electronic and thermal Energies = -786.774433  
Sum of electronic and thermal Enthalpies = -786.773489  
Sum of electronic and thermal Free Energies = -786.829060

## 9-Phenylacridine-H cation

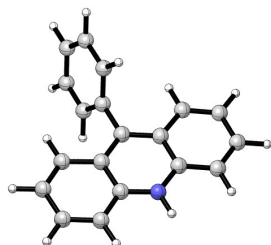

SCF Energy = -787.070695140  
Zero-point correction = 0.279665  
Thermal correction to Energy = 0.293859  
Thermal correction to Enthalpy = 0.294803  
Thermal correction to Gibbs Free Energy = 0.238128  
Sum of electronic and zero-point Energies = -786.791031  
Sum of electronic and thermal Energies = -786.776836  
Sum of electronic and thermal Enthalpies = -786.775892  
Sum of electronic and thermal Free Energies = -786.832567

|   |             |             |             |
|---|-------------|-------------|-------------|
| C | 0.00000000  | 0.00000000  | -0.14674200 |
| C | -0.01421100 | 1.21638100  | 0.55713200  |
| C | -0.01914400 | 1.19229900  | 1.97498300  |
| N | 0.00000000  | 0.00000000  | 2.60701600  |
| C | 0.01914400  | -1.19229900 | 1.97498300  |
| C | 0.01421100  | -1.21638100 | 0.55713200  |
| C | -0.03520800 | 2.38763200  | 2.71841700  |
| H | -0.04420700 | 2.34704800  | 3.79979300  |
| C | -0.03593800 | 3.57949600  | 2.05808600  |
| C | 0.00000000  | 2.48617300  | -0.08498100 |
| H | 0.02731300  | 2.52457500  | -1.16443400 |
| C | -0.01254200 | 3.63252400  | 0.64517200  |
| C | 0.00000000  | -2.48617300 | -0.08498100 |
| H | -0.02731300 | -2.52457500 | -1.16443400 |
| C | 0.01254200  | -3.63252400 | 0.64517200  |
| C | 0.03520800  | -2.38763200 | 2.71841700  |
| H | 0.04420700  | -2.34704800 | 3.79979300  |
| C | 0.03593800  | -3.57949600 | 2.05808600  |
| H | 0.00089100  | 4.59291000  | 0.14904400  |
| H | -0.04738200 | 4.50173000  | 2.62367100  |
| H | 0.04738200  | -4.50173000 | 2.62367100  |
| H | -0.00089100 | -4.59291000 | 0.14904400  |
| C | 0.00000000  | 0.00000000  | -1.62901400 |
| C | 1.14700100  | -0.36613200 | -2.32641000 |
| C | -1.14700100 | 0.36613200  | -2.32641000 |
| C | 1.14630000  | -0.35832000 | -3.71209500 |
| C | -1.14630000 | 0.35832000  | -3.71209500 |
| C | 0.00000000  | 0.00000000  | -4.40618700 |
| H | 2.04042700  | -0.64989900 | -1.78425300 |
| H | -2.04042700 | 0.64989900  | -1.78425300 |
| H | 2.04399000  | -0.63523000 | -4.24917300 |
| H | -2.04399000 | 0.63523000  | -4.24917300 |
| H | 0.00000000  | 0.00000000  | -5.48845400 |
| H | 0.00000000  | 0.00000000  | 3.61805400  |



## 9-Phenylacridine-H cation geometry – single point as radical

SCF Energy = -787.211440093  
Zero-point correction = 0.276414  
Thermal correction to Energy = 0.290175  
Thermal correction to Enthalpy = 0.291120  
Thermal correction to Gibbs Free Energy = 0.235410  
Sum of electronic and zero-point Energies = -786.935026  
Sum of electronic and thermal Energies = -786.921265  
Sum of electronic and thermal Enthalpies = -786.920320  
Sum of electronic and thermal Free Energies = -786.976030

## *i*-PrCO<sub>2</sub>H

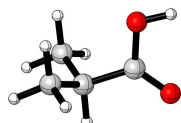

SCF Energy = -307.750080931  
Zero-point correction = 0.119491  
Thermal correction to Energy = 0.126528  
Thermal correction to Enthalpy = 0.127472  
Thermal correction to Gibbs Free Energy = 0.087842  
Sum of electronic and zero-point Energies = -307.630590  
Sum of electronic and thermal Energies = -307.623553  
Sum of electronic and thermal Enthalpies = -307.622609  
Sum of electronic and thermal Free Energies = -307.662239

|   |              |              |              |
|---|--------------|--------------|--------------|
| H | 2.017422000  | 0.000378000  | 1.327836000  |
| O | 1.061559000  | 0.000361000  | 1.189994000  |
| O | 1.730994000  | -0.000271000 | -0.934153000 |
| C | 0.832659000  | -0.000019000 | -0.129796000 |
| C | -0.639215000 | -0.000103000 | -0.469515000 |
| H | -0.680022000 | -0.000336000 | -1.559017000 |
| C | -1.320106000 | -1.265207000 | 0.056076000  |
| H | -2.360420000 | -1.280417000 | -0.271209000 |
| H | -0.833186000 | -2.166608000 | -0.318850000 |
| H | -1.304733000 | -1.291628000 | 1.146354000  |
| C | -1.320161000 | 1.265189000  | 0.055544000  |
| H | -0.833279000 | 2.166454000  | -0.319755000 |
| H | -2.360475000 | 1.280218000  | -0.271753000 |
| H | -1.304796000 | 1.292067000  | 1.145811000  |

## *i*-PrCO<sub>2</sub> radical

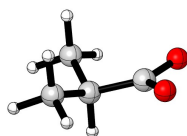

SCF Energy = -307.066295139  
Zero-point correction = 0.105151  
Thermal correction to Energy = 0.112152  
Thermal correction to Enthalpy = 0.113097  
Thermal correction to Gibbs Free Energy = 0.072631  
Sum of electronic and zero-point Energies = -306.961144  
Sum of electronic and thermal Energies = -306.954143  
Sum of electronic and thermal Enthalpies = -306.953198  
Sum of electronic and thermal Free Energies = -306.993664

|   |             |              |             |
|---|-------------|--------------|-------------|
| O | 1.527509000 | -1.022160000 | 0.068563000 |
|---|-------------|--------------|-------------|

|   |              |              |              |
|---|--------------|--------------|--------------|
| O | 1.527516000  | 1.022154000  | 0.068545000  |
| C | 0.815946000  | -0.000002000 | -0.067309000 |
| C | -0.647338000 | 0.000003000  | -0.378869000 |
| H | -0.682675000 | 0.000008000  | -1.475000000 |
| C | -1.316919000 | -1.274580000 | 0.127678000  |
| H | -2.354829000 | -1.294472000 | -0.204063000 |
| H | -0.821870000 | -2.167913000 | -0.252697000 |
| H | -1.306409000 | -1.311197000 | 1.218235000  |
| C | -1.316912000 | 1.274585000  | 0.127690000  |
| H | -0.821867000 | 2.167918000  | -0.252690000 |
| H | -2.354826000 | 1.294478000  | -0.204037000 |
| H | -1.306386000 | 1.311198000  | 1.218247000  |

## Carbon dioxide

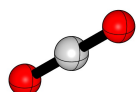

SCF Energy = -188.607636072  
 Zero-point correction = 0.011812  
 Thermal correction to Energy = 0.014420  
 Thermal correction to Enthalpy = 0.015364  
 Thermal correction to Gibbs Free Energy = -0.008868  
 Sum of electronic and zero-point Energies = -188.595824  
 Sum of electronic and thermal Energies = -188.593216  
 Sum of electronic and thermal Enthalpies = -188.592272  
 Sum of electronic and thermal Free Energies = -188.616504

|   |             |             |              |
|---|-------------|-------------|--------------|
| C | 0.000000000 | 0.000000000 | 0.000000000  |
| O | 0.000000000 | 0.000000000 | 1.155616000  |
| O | 0.000000000 | 0.000000000 | -1.155616000 |

## Isopropyl radical

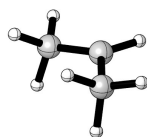

SCF Energy = -118.481237272  
 Zero-point correction = 0.088364  
 Thermal correction to Energy = 0.093438  
 Thermal correction to Enthalpy = 0.094382  
 Thermal correction to Gibbs Free Energy = 0.061425  
 Sum of electronic and zero-point Energies = -118.392873  
 Sum of electronic and thermal Energies = -118.387799  
 Sum of electronic and thermal Enthalpies = -118.386855  
 Sum of electronic and thermal Free Energies = -118.419813

|   |              |              |              |
|---|--------------|--------------|--------------|
| C | -0.000002000 | 0.537175000  | -0.046179000 |
| H | -0.000013000 | 1.610044000  | 0.103070000  |
| C | 1.288981000  | -0.198386000 | 0.002917000  |
| C | -1.288977000 | -0.198392000 | 0.002915000  |
| H | -2.140217000 | 0.451483000  | -0.203008000 |
| H | -1.304094000 | -1.023372000 | -0.717756000 |
| H | -1.457144000 | -0.654319000 | 0.990282000  |
| H | 1.304312000  | -1.023007000 | -0.718157000 |
| H | 1.456881000  | -0.654818000 | 0.990100000  |
| H | 2.140259000  | 0.451610000  | -0.202450000 |

## Benzyl radical

SCF Energy = -270.913697526  
Zero-point correction = 0.115343  
Thermal correction to Energy = 0.120979  
Thermal correction to Enthalpy = 0.121923  
Thermal correction to Gibbs Free Energy = 0.085695  
Sum of electronic and zero-point Energies = -270.798355  
Sum of electronic and thermal Energies = -270.792718  
Sum of electronic and thermal Enthalpies = -270.791774  
Sum of electronic and thermal Free Energies = -270.828002

|   |              |              |              |
|---|--------------|--------------|--------------|
| C | 1.127298000  | 1.204755000  | -0.000004000 |
| C | -0.250806000 | 1.211368000  | 0.000027000  |
| C | -0.988272000 | 0.000000000  | 0.000019000  |
| C | -0.250806000 | -1.211368000 | 0.000034000  |
| C | 1.127295000  | -1.204756000 | 0.000004000  |
| C | 1.828319000  | 0.000000000  | -0.000031000 |
| H | 1.668251000  | 2.142971000  | 0.000034000  |
| H | -0.789252000 | 2.151788000  | 0.000101000  |
| H | -0.789255000 | -2.151787000 | 0.000113000  |
| H | 1.668250000  | -2.142971000 | 0.000053000  |
| H | 2.910678000  | -0.000003000 | -0.000225000 |
| C | -2.389519000 | 0.000002000  | 0.000039000  |
| H | -2.944859000 | -0.928563000 | -0.000403000 |
| H | -2.944869000 | 0.928559000  | -0.000205000 |

## (Methylthio)methyl radical

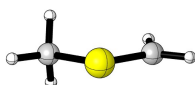

SCF Energy = -477.371600848  
Zero-point correction = 0.061540  
Thermal correction to Energy = 0.066763  
Thermal correction to Enthalpy = 0.067707  
Thermal correction to Gibbs Free Energy = 0.033713  
Sum of electronic and zero-point Energies = -477.310061  
Sum of electronic and thermal Energies = -477.304838  
Sum of electronic and thermal Enthalpies = -477.303894  
Sum of electronic and thermal Free Energies = -477.337888

|   |              |              |              |
|---|--------------|--------------|--------------|
| C | -1.343554000 | 0.566592000  | 0.018841000  |
| H | -1.123223000 | 1.616278000  | -0.106597000 |
| H | -2.362431000 | 0.210416000  | 0.035243000  |
| C | 1.373730000  | 0.421641000  | 0.007585000  |
| H | 1.415326000  | 1.013716000  | 0.920303000  |
| H | 2.227189000  | -0.252752000 | -0.026309000 |
| H | 1.392728000  | 1.073782000  | -0.864264000 |
| S | -0.108165000 | -0.599427000 | -0.007308000 |

## (Methoxy)methyl radical

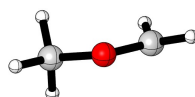

SCF Energy = -154.376737610  
Zero-point correction = 0.066166

Thermal correction to Energy = 0.070616  
 Thermal correction to Enthalpy = 0.071560  
 Thermal correction to Gibbs Free Energy = 0.040205  
 Sum of electronic and zero-point Energies = -154.310572  
 Sum of electronic and thermal Energies = -154.306122  
 Sum of electronic and thermal Enthalpies = -154.305177  
 Sum of electronic and thermal Free Energies = -154.336533

|   |              |              |              |
|---|--------------|--------------|--------------|
| C | 1.197247000  | 0.224670000  | -0.063176000 |
| H | 1.117551000  | 1.277192000  | 0.187588000  |
| H | 2.123212000  | -0.318625000 | 0.057108000  |
| O | 0.092358000  | -0.540967000 | 0.029530000  |
| C | -1.133638000 | 0.167415000  | -0.008630000 |
| H | -1.245935000 | 0.690995000  | -0.961503000 |
| H | -1.929997000 | -0.564905000 | 0.101025000  |
| H | -1.185351000 | 0.890571000  | 0.810380000  |

### *tert*-Butyl radical

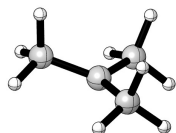

SCF Energy = -157.803344652  
 Zero-point correction = 0.117226  
 Thermal correction to Energy = 0.123406  
 Thermal correction to Enthalpy = 0.124350  
 Thermal correction to Gibbs Free Energy = 0.088193  
 Sum of electronic and zero-point Energies = -157.686119  
 Sum of electronic and thermal Energies = -157.679939  
 Sum of electronic and thermal Enthalpies = -157.678995  
 Sum of electronic and thermal Free Energies = -157.715152

|   |              |              |              |
|---|--------------|--------------|--------------|
| C | 0.001352000  | 0.000279000  | -0.162409000 |
| C | -0.662064000 | -1.321465000 | 0.015886000  |
| H | -1.651851000 | -1.342825000 | -0.446797000 |
| H | -0.065355000 | -2.133446000 | -0.406417000 |
| H | -0.807849000 | -1.556756000 | 1.082482000  |
| C | 1.477330000  | 0.088390000  | 0.016084000  |
| H | 1.989292000  | -0.767920000 | -0.429668000 |
| H | 1.883988000  | 1.001946000  | -0.424380000 |
| H | 1.753982000  | 0.101451000  | 1.082694000  |
| C | -0.815367000 | 1.233179000  | 0.015844000  |
| H | -0.320655000 | 2.111088000  | -0.406321000 |
| H | -1.800739000 | 1.135088000  | -0.446505000 |
| H | -0.988322000 | 1.449074000  | 1.082485000  |

### Ethyl radical

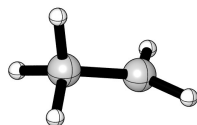

SCF Energy = -79.1595809251  
 Zero-point correction = 0.059380  
 Thermal correction to Energy = 0.063399  
 Thermal correction to Enthalpy = 0.064344  
 Thermal correction to Gibbs Free Energy = 0.035055

Sum of electronic and zero-point Energies = -79.100201  
 Sum of electronic and thermal Energies = -79.096181  
 Sum of electronic and thermal Enthalpies = -79.095237  
 Sum of electronic and thermal Free Energies = -79.124526  
 C 0.791091000 0.000000000 -0.020784000  
 H 1.344303000 -0.927310000 0.045266000  
 H 1.344311000 0.927306000 0.045263000  
 C -0.690924000 0.000001000 -0.002006000  
 H -1.102910000 0.886153000 -0.489512000  
 H -1.102909000 -0.886081000 -0.489641000  
 H -1.083792000 -0.000074000 1.025365000

### Product of benzyl radical addition to **3a**

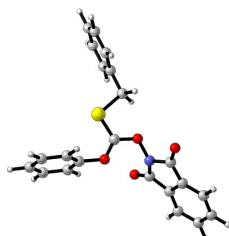

SCF Energy = -1601.75533474  
 Zero-point correction = 0.333358  
 Thermal correction to Energy = 0.356575  
 Thermal correction to Enthalpy = 0.357519  
 Thermal correction to Gibbs Free Energy = 0.275440  
 Sum of electronic and zero-point Energies = -1601.421977  
 Sum of electronic and thermal Energies = -1601.398760  
 Sum of electronic and thermal Enthalpies = -1601.397815  
 Sum of electronic and thermal Free Energies = -1601.479895

S -1.883662000 0.180851000 -0.115991000  
 C -0.198863000 0.350250000 -0.284371000  
 O 0.381997000 1.483358000 -0.392381000  
 C -0.368267000 2.680566000 -0.264878000  
 C -0.478868000 3.236179000 0.991408000  
 C -0.887131000 3.251378000 -1.406375000  
 C -1.171332000 4.431767000 1.105512000  
 C -1.575250000 4.447801000 -1.269433000  
 C -1.718213000 5.033076000 -0.019621000  
 H -0.031077000 2.746804000 1.845822000  
 H -0.754495000 2.776686000 -2.368919000  
 H -1.278134000 4.894398000 2.077255000  
 H -1.996660000 4.921796000 -2.145492000  
 H -2.252973000 5.968423000 0.077960000  
 O 0.523937000 -0.722729000 -0.332554000  
 N 1.895237000 -0.521482000 -0.290230000  
 C 2.496545000 -0.274923000 0.977980000  
 C 2.718198000 -1.195337000 -1.231637000  
 C 3.992205000 -1.167277000 -0.577724000  
 C 6.331322000 -1.481873000 -0.207322000  
 C 6.199903000 -0.935313000 1.096309000  
 C 5.245429000 -1.595374000 -1.038823000  
 H 7.077395000 -0.859641000 1.726258000  
 H 5.346413000 -2.013816000 -2.032788000  
 C 4.985403000 -0.505839000 1.566640000  
 H 4.888083000 -0.088119000 2.561192000  
 C 3.859151000 -0.619051000 0.735149000  
 H 7.305220000 -1.812564000 -0.545687000  
 O 2.312035000 -1.625120000 -2.308996000  
 O 1.853156000 0.148874000 1.940422000  
 C -2.062326000 -1.643253000 -0.006564000  
 H -1.643944000 -2.071807000 -0.913639000  
 H -1.495487000 -1.977875000 0.858781000  
 C -3.530489000 -1.929605000 0.128694000

|   |              |              |              |
|---|--------------|--------------|--------------|
| C | -4.324518000 | -2.058059000 | -1.006610000 |
| C | -4.109243000 | -2.056462000 | 1.386773000  |
| C | -5.680917000 | -2.313368000 | -0.884950000 |
| H | -3.877053000 | -1.961877000 | -1.988822000 |
| C | -5.465826000 | -2.314416000 | 1.507892000  |
| H | -3.495947000 | -1.958907000 | 2.274756000  |
| C | -6.253153000 | -2.441543000 | 0.372571000  |
| H | -6.290310000 | -2.416032000 | -1.773471000 |
| H | -5.908284000 | -2.419116000 | 2.489996000  |
| H | -7.312371000 | -2.642607000 | 0.468615000  |

### Product of (methylthio)methyl radical addition to **3a**

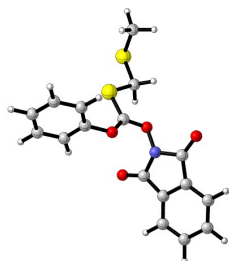

SCF Energy = -1808.21673439  
 Zero-point correction = 0.280662  
 Thermal correction to Energy = 0.302392  
 Thermal correction to Enthalpy = 0.303336  
 Thermal correction to Gibbs Free Energy = 0.226060  
 Sum of electronic and zero-point Energies = -1807.936073  
 Sum of electronic and thermal Energies = -1807.914343  
 Sum of electronic and thermal Enthalpies = -1807.913399  
 Sum of electronic and thermal Free Energies = -1807.990674

|   |              |              |              |
|---|--------------|--------------|--------------|
| S | -2.340044000 | 0.644613000  | -0.202934000 |
| C | -0.768851000 | 0.093712000  | 0.160576000  |
| O | -0.502564000 | -1.119159000 | 0.458408000  |
| C | -1.511584000 | -2.112245000 | 0.358846000  |
| C | -1.675352000 | -2.734687000 | -0.859750000 |
| C | -2.221425000 | -2.440341000 | 1.492771000  |
| C | -2.630586000 | -3.735524000 | -0.945435000 |
| C | -3.171232000 | -3.445704000 | 1.384782000  |
| C | -3.375880000 | -4.087143000 | 0.171652000  |
| H | -1.068720000 | -2.441967000 | -1.706301000 |
| H | -2.035708000 | -1.929029000 | 2.427328000  |
| H | -2.786589000 | -4.242464000 | -1.887941000 |
| H | -3.747502000 | -3.727712000 | 2.255592000  |
| H | -4.118426000 | -4.870425000 | 0.097837000  |
| O | 0.196042000  | 0.957431000  | 0.154944000  |
| N | 1.472237000  | 0.421971000  | 0.232366000  |
| C | 2.036757000  | -0.136398000 | -0.950425000 |
| C | 2.402366000  | 0.969037000  | 1.153621000  |
| C | 3.649021000  | 0.527197000  | 0.602436000  |
| C | 5.999274000  | 0.161198000  | 0.381597000  |
| C | 5.783286000  | -0.488481000 | -0.861812000 |
| C | 4.949090000  | 0.662673000  | 1.109076000  |
| H | 6.634452000  | -0.872817000 | -1.409767000 |
| H | 5.114055000  | 1.157685000  | 2.058215000  |
| C | 4.519970000  | -0.637167000 | -1.374658000 |
| H | 4.358793000  | -1.134037000 | -2.323410000 |
| C | 3.430842000  | -0.127295000 | -0.648961000 |
| H | 7.009822000  | 0.260845000  | 0.757234000  |
| O | 2.081817000  | 1.621056000  | 2.144878000  |
| O | 1.341111000  | -0.503726000 | -1.900148000 |
| C | -2.036399000 | 2.417368000  | -0.570201000 |
| H | -1.552796000 | 2.883066000  | 0.284581000  |
| H | -1.396987000 | 2.476423000  | -1.447348000 |
| S | -3.598629000 | 3.194297000  | -0.953685000 |
| C | -4.270770000 | 3.435365000  | 0.702361000  |

|   |              |             |             |
|---|--------------|-------------|-------------|
| H | -5.228429000 | 3.935432000 | 0.568906000 |
| H | -4.437676000 | 2.484847000 | 1.206270000 |
| H | -3.613588000 | 4.069597000 | 1.294616000 |

### Product of (methoxy)methyl radical addition to **3a**

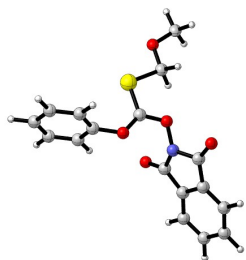

SCF Energy = -1485.22375357  
 Zero-point correction = 0.284006  
 Thermal correction to Energy = 0.305445  
 Thermal correction to Enthalpy = 0.306389  
 Thermal correction to Gibbs Free Energy = 0.229345  
 Sum of electronic and zero-point Energies = -1484.939747  
 Sum of electronic and thermal Energies = -1484.918309  
 Sum of electronic and thermal Enthalpies = -1484.917364  
 Sum of electronic and thermal Free Energies = -1484.994409

|   |              |              |              |
|---|--------------|--------------|--------------|
| S | -2.424381000 | 1.136294000  | 0.055432000  |
| C | -0.965776000 | 0.334278000  | 0.396293000  |
| O | -0.899031000 | -0.920489000 | 0.625531000  |
| C | -2.020740000 | -1.751016000 | 0.370909000  |
| C | -2.125360000 | -2.301224000 | -0.888649000 |
| C | -2.899370000 | -2.008255000 | 1.400159000  |
| C | -3.193624000 | -3.150771000 | -1.129762000 |
| C | -3.961818000 | -2.860669000 | 1.135734000  |
| C | -4.108259000 | -3.426744000 | -0.122271000 |
| H | -1.386593000 | -2.065248000 | -1.643320000 |
| H | -2.757475000 | -1.559293000 | 2.373775000  |
| H | -3.307137000 | -3.600305000 | -2.106922000 |
| H | -4.673000000 | -3.083416000 | 1.919557000  |
| H | -4.937599000 | -4.093329000 | -0.318178000 |
| O | 0.119086000  | 1.038438000  | 0.474480000  |
| N | 1.295709000  | 0.304564000  | 0.425341000  |
| C | 1.672191000  | -0.234873000 | -0.839678000 |
| C | 2.375454000  | 0.662105000  | 1.275701000  |
| C | 3.492190000  | 0.088998000  | 0.582493000  |
| C | 5.738074000  | -0.570242000 | 0.105011000  |
| C | 5.319871000  | -1.097774000 | -1.144874000 |
| C | 4.839584000  | 0.013840000  | 0.962527000  |
| H | 6.055259000  | -1.551101000 | -1.797686000 |
| H | 5.159701000  | 0.417760000  | 1.915205000  |
| C | 4.006896000  | -1.041043000 | -1.535477000 |
| H | 3.690203000  | -1.445789000 | -2.488792000 |
| C | 3.071378000  | -0.441979000 | -0.675779000 |
| H | 6.783296000  | -0.633275000 | 0.380130000  |
| O | 2.243880000  | 1.288638000  | 2.323680000  |
| O | 0.847021000  | -0.421766000 | -1.738696000 |
| C | -1.796653000 | 2.834121000  | -0.248394000 |
| H | -1.366533000 | 3.225542000  | 0.677525000  |
| H | -1.037033000 | 2.788508000  | -1.033921000 |
| O | -2.941964000 | 3.508340000  | -0.637356000 |
| C | -2.696329000 | 4.887401000  | -0.866706000 |
| H | -3.642536000 | 5.326812000  | -1.170997000 |
| H | -2.341825000 | 5.375067000  | 0.046199000  |
| H | -1.956783000 | 5.023202000  | -1.661411000 |

Product of *tert*-butyl radical addition to **3a**

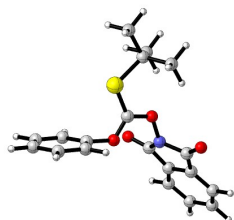

SCF Energy = -1488.65754441  
 Zero-point correction = 0.335991  
 Thermal correction to Energy = 0.358773  
 Thermal correction to Enthalpy = 0.359717  
 Thermal correction to Gibbs Free Energy = 0.281373  
 Sum of electronic and zero-point Energies = -1488.321554  
 Sum of electronic and thermal Energies = -1488.298771  
 Sum of electronic and thermal Enthalpies = -1488.297827  
 Sum of electronic and thermal Free Energies = -1488.376171

|   |              |              |              |
|---|--------------|--------------|--------------|
| S | -2.423723000 | 1.047729000  | -0.129023000 |
| C | -0.933376000 | 0.254921000  | 0.056174000  |
| O | -0.843315000 | -1.011791000 | 0.215379000  |
| C | -2.007615000 | -1.820769000 | 0.225936000  |
| C | -2.429574000 | -2.365097000 | -0.967408000 |
| C | -2.612238000 | -2.068758000 | 1.438832000  |
| C | -3.541513000 | -3.193391000 | -0.938017000 |
| C | -3.721737000 | -2.900375000 | 1.446304000  |
| C | -4.185116000 | -3.457393000 | 0.262747000  |
| H | -1.902938000 | -2.147518000 | -1.886569000 |
| H | -2.224694000 | -1.625060000 | 2.345649000  |
| H | -3.900417000 | -3.635251000 | -1.857678000 |
| H | -4.220072000 | -3.113484000 | 2.382262000  |
| H | -5.049879000 | -4.107439000 | 0.276946000  |
| O | 0.163978000  | 0.942299000  | 0.049659000  |
| N | 1.341194000  | 0.217884000  | 0.140039000  |
| C | 1.908132000  | -0.320876000 | -1.049644000 |
| C | 2.272065000  | 0.568518000  | 1.153038000  |
| C | 3.484698000  | 0.003735000  | 0.644685000  |
| C | 5.773568000  | -0.672839000 | 0.536742000  |
| C | 5.558324000  | -1.201753000 | -0.763168000 |
| C | 4.753308000  | -0.079697000 | 1.236546000  |
| H | 6.385283000  | -1.664864000 | -1.286710000 |
| H | 4.917386000  | 0.322877000  | 2.228664000  |
| C | 4.325042000  | -1.134629000 | -1.359975000 |
| H | 4.163152000  | -1.541441000 | -2.350673000 |
| C | 3.267651000  | -0.527227000 | -0.664089000 |
| H | 6.759201000  | -0.744213000 | 0.979088000  |
| O | 1.968183000  | 1.189166000  | 2.170572000  |
| O | 1.247397000  | -0.517011000 | -2.070638000 |
| C | -2.055126000 | 2.880319000  | -0.273360000 |
| C | -1.409412000 | 3.401602000  | 1.004077000  |
| C | -3.472825000 | 3.438960000  | -0.426143000 |
| H | -3.964482000 | 3.056836000  | -1.321711000 |
| H | -4.092166000 | 3.217496000  | 0.444123000  |
| H | -3.394864000 | 4.522723000  | -0.519547000 |
| H | -2.017806000 | 3.171129000  | 1.878560000  |
| H | -1.332583000 | 4.487470000  | 0.918543000  |
| H | -0.407513000 | 3.005563000  | 1.154744000  |
| C | -1.229454000 | 3.173854000  | -1.519047000 |
| H | -0.215811000 | 2.788475000  | -1.442011000 |
| H | -1.699334000 | 2.763650000  | -2.412571000 |
| H | -1.170018000 | 4.258271000  | -1.632159000 |



## Product of ethyl radical addition to 3a

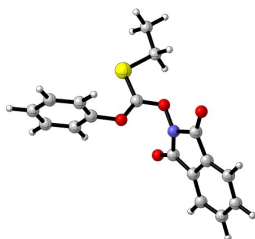

SCF Energy = -1410.02193106  
 Zero-point correction = 0.279779  
 Thermal correction to Energy = 0.299963  
 Thermal correction to Enthalpy = 0.300907  
 Thermal correction to Gibbs Free Energy = 0.227414  
 Sum of electronic and zero-point Energies = -1409.742153  
 Sum of electronic and thermal Energies = -1409.721968  
 Sum of electronic and thermal Enthalpies = -1409.721024  
 Sum of electronic and thermal Free Energies = -1409.794517

|   |              |              |              |
|---|--------------|--------------|--------------|
| S | -2.439069000 | 1.552315000  | -0.171107000 |
| C | -1.028252000 | 0.631816000  | 0.046194000  |
| O | -1.037799000 | -0.634152000 | 0.220302000  |
| C | -2.267335000 | -1.342617000 | 0.222161000  |
| C | -2.724833000 | -1.851814000 | -0.973762000 |
| C | -2.900002000 | -1.534126000 | 1.431196000  |
| C | -3.903087000 | -2.583037000 | -0.950912000 |
| C | -4.075628000 | -2.269374000 | 1.431556000  |
| C | -4.575112000 | -2.788721000 | 0.245708000  |
| H | -2.175324000 | -1.681850000 | -1.889598000 |
| H | -2.484020000 | -1.122158000 | 2.340380000  |
| H | -4.291481000 | -2.995482000 | -1.872214000 |
| H | -4.596696000 | -2.437392000 | 2.364288000  |
| H | -5.492801000 | -3.361684000 | 0.254729000  |
| O | 0.112142000  | 1.246366000  | 0.049115000  |
| N | 1.233511000  | 0.436640000  | 0.128247000  |
| C | 1.763873000  | -0.115487000 | -1.071608000 |
| C | 2.175887000  | 0.665115000  | 1.164919000  |
| C | 3.344188000  | 0.022251000  | 0.644176000  |
| C | 5.576300000  | -0.821141000 | 0.525318000  |
| C | 5.333410000  | -1.283117000 | -0.794829000 |
| C | 4.597056000  | -0.179152000 | 1.240778000  |
| H | 6.128172000  | -1.786224000 | -1.331272000 |
| H | 4.782255000  | 0.172719000  | 2.248330000  |
| C | 4.113813000  | -1.101843000 | -1.396034000 |
| H | 3.931080000  | -1.456574000 | -2.402969000 |
| C | 3.099091000  | -0.441714000 | -0.684730000 |
| H | 6.550458000  | -0.980742000 | 0.969979000  |
| O | 1.912673000  | 1.263264000  | 2.206623000  |
| O | 1.095793000  | -0.231727000 | -2.100421000 |
| C | -1.752395000 | 3.234730000  | -0.352777000 |
| H | -1.219181000 | 3.474435000  | 0.564071000  |
| H | -1.055352000 | 3.218884000  | -1.187151000 |
| C | -2.908649000 | 4.188658000  | -0.599692000 |
| H | -3.614736000 | 4.191444000  | 0.230629000  |
| H | -2.501611000 | 5.194144000  | -0.702215000 |
| H | -3.442640000 | 3.944405000  | -1.517931000 |

## Thionocarbonate 2f

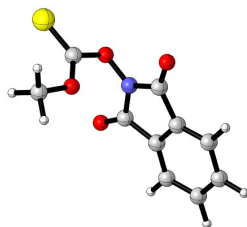

SCF Energy = -1139.12847573  
Zero-point correction = 0.161259  
Thermal correction to Energy = 0.174972  
Thermal correction to Enthalpy = 0.175916  
Thermal correction to Gibbs Free Energy = 0.118347  
Sum of electronic and zero-point Energies = -1138.967216  
Sum of electronic and thermal Energies = -1138.953503  
Sum of electronic and thermal Enthalpies = -1138.952559  
Sum of electronic and thermal Free Energies = -1139.010129

|   |              |              |              |
|---|--------------|--------------|--------------|
| S | 4.011982000  | -0.000329000 | -0.440097000 |
| C | 2.425913000  | -0.000336000 | -0.075738000 |
| O | 1.842106000  | 0.000691000  | 1.082232000  |
| O | 1.523939000  | -0.000964000 | -1.101825000 |
| N | 0.208876000  | -0.000622000 | -0.742380000 |
| C | -0.507920000 | 1.178079000  | -0.513245000 |
| C | -0.508142000 | -1.178911000 | -0.511831000 |
| C | -1.868400000 | -0.694985000 | -0.156164000 |
| C | -4.152307000 | -0.694432000 | 0.459701000  |
| C | -4.152115000 | 0.695453000  | 0.459093000  |
| C | -3.001397000 | -1.414826000 | 0.149665000  |
| H | -5.062491000 | 1.226169000  | 0.704357000  |
| H | -2.995542000 | -2.496494000 | 0.149655000  |
| C | -3.001011000 | 1.415256000  | 0.148413000  |
| H | -2.994881000 | 2.496921000  | 0.147368000  |
| C | -1.868220000 | 0.694835000  | -0.156815000 |
| H | -5.062823000 | -1.224680000 | 0.705456000  |
| O | -0.061367000 | -2.287327000 | -0.589800000 |
| O | -0.060768000 | 2.286292000  | -0.591948000 |
| C | 2.642666000  | 0.001836000  | 2.273549000  |
| H | 3.264020000  | -0.891161000 | 2.297043000  |
| H | 3.263927000  | 0.894940000  | 2.295387000  |
| H | 1.928265000  | 0.002559000  | 3.089893000  |

## Dimethyl thionocarbonate

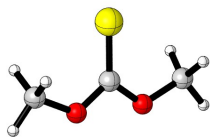

SCF Energy = -666.591195469  
Zero-point correction = 0.093292  
Thermal correction to Energy = 0.100502  
Thermal correction to Enthalpy = 0.101446  
Thermal correction to Gibbs Free Energy = 0.061408  
Sum of electronic and zero-point Energies = -666.497903  
Sum of electronic and thermal Energies = -666.490694  
Sum of electronic and thermal Enthalpies = -666.489750  
Sum of electronic and thermal Free Energies = -666.529787

|   |              |              |              |
|---|--------------|--------------|--------------|
| S | 0.000101000  | 1.450470000  | 0.000004000  |
| C | -0.000009000 | -0.199918000 | 0.000106000  |
| O | -1.058172000 | -0.978438000 | 0.000025000  |
| O | 1.058110000  | -0.978516000 | 0.000027000  |
| C | 2.360946000  | -0.395208000 | -0.000056000 |
| H | 3.048320000  | -1.235836000 | -0.000106000 |
| H | 2.501816000  | 0.215184000  | -0.890743000 |
| H | 2.501931000  | 0.215173000  | 0.890621000  |
| C | -2.361093000 | -0.395072000 | -0.000055000 |
| H | -2.501848000 | 0.215277000  | -0.890765000 |
| H | -3.048443000 | -1.235738000 | -0.000111000 |
| H | -2.501964000 | 0.215255000  | 0.890652000  |

### Phenyl methyl thionocarbonate

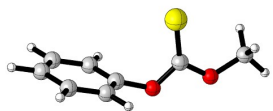

SCF Energy = -858.325007013  
 Zero-point correction = 0.146427  
 Thermal correction to Energy = 0.156451  
 Thermal correction to Enthalpy = 0.157395  
 Thermal correction to Gibbs Free Energy = 0.109368  
 Sum of electronic and zero-point Energies = -858.178580  
 Sum of electronic and thermal Energies = -858.168556  
 Sum of electronic and thermal Enthalpies = -858.167612  
 Sum of electronic and thermal Free Energies = -858.215639

|   |              |              |              |
|---|--------------|--------------|--------------|
| S | -1.390252000 | 1.470711000  | 0.001877000  |
| C | -1.480611000 | -0.170659000 | -0.000476000 |
| O | -0.456574000 | -1.016097000 | -0.002195000 |
| C | 0.852670000  | -0.538598000 | -0.001029000 |
| C | 1.492913000  | -0.352340000 | 1.208153000  |
| C | 1.493583000  | -0.348661000 | -1.209295000 |
| C | 2.819769000  | 0.051238000  | 1.202455000  |
| C | 2.820454000  | 0.054874000  | -1.201678000 |
| C | 3.482759000  | 0.256639000  | 0.000877000  |
| H | 0.958532000  | -0.518249000 | 2.134018000  |
| H | 0.959687000  | -0.511797000 | -2.135932000 |
| H | 3.334483000  | 0.203838000  | 2.142049000  |
| H | 3.335695000  | 0.210212000  | -2.140533000 |
| H | 4.518463000  | 0.570554000  | 0.001677000  |
| O | -2.568975000 | -0.899304000 | -0.001289000 |
| C | -3.844804000 | -0.255723000 | 0.000159000  |
| H | -4.569658000 | -1.064000000 | -0.003248000 |
| H | -3.955161000 | 0.356976000  | 0.893397000  |
| H | -3.954020000 | 0.363678000  | -0.888573000 |

### Dimethyl xanthate

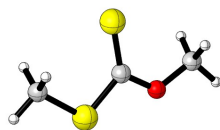

SCF Energy = -989.563013246  
 Zero-point correction = 0.089225  
 Thermal correction to Energy = 0.096921  
 Thermal correction to Enthalpy = 0.097865  
 Thermal correction to Gibbs Free Energy = 0.056529  
 Sum of electronic and zero-point Energies = -989.473788  
 Sum of electronic and thermal Energies = -989.466092  
 Sum of electronic and thermal Enthalpies = -989.465148  
 Sum of electronic and thermal Free Energies = -989.506485

|   |              |              |              |
|---|--------------|--------------|--------------|
| S | -0.428471000 | 1.551299000  | 0.000006000  |
| C | -0.264144000 | -0.080888000 | 0.000061000  |
| O | -1.246051000 | -0.962796000 | 0.000013000  |
| S | 1.232045000  | -0.982222000 | 0.000006000  |
| C | 2.482012000  | 0.302460000  | -0.000032000 |
| H | 3.435107000  | -0.224985000 | -0.000060000 |
| H | 2.399583000  | 0.918999000  | -0.891942000 |
| H | 2.399634000  | 0.918997000  | 0.891885000  |
| C | -2.603664000 | -0.513933000 | -0.000036000 |
| H | -2.804011000 | 0.079800000  | -0.890920000 |
| H | -3.200234000 | -1.421269000 | -0.000075000 |
| H | -2.804080000 | 0.079769000  | 0.890854000  |

### Product of isopropyl radical addition to thionocarbonate **2f**

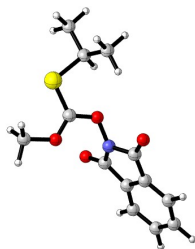

SCF Energy = -1257.60711323  
 Zero-point correction = 0.254840  
 Thermal correction to Energy = 0.273549  
 Thermal correction to Enthalpy = 0.274493  
 Thermal correction to Gibbs Free Energy = 0.204482  
 Sum of electronic and zero-point Energies = -1257.352274  
 Sum of electronic and thermal Energies = -1257.333565  
 Sum of electronic and thermal Enthalpies = -1257.332620  
 Sum of electronic and thermal Free Energies = -1257.402631

|   |              |              |              |
|---|--------------|--------------|--------------|
| S | -3.251690000 | 0.548181000  | -0.163544000 |
| C | -1.574628000 | 0.689481000  | -0.396799000 |
| O | -1.037713000 | 1.633258000  | -1.054187000 |
| O | -0.802793000 | -0.217036000 | 0.128327000  |
| N | 0.554809000  | -0.032108000 | -0.049285000 |
| C | 1.283721000  | 0.757974000  | 0.877460000  |
| C | 1.302777000  | -1.009916000 | -0.750781000 |
| C | 2.642602000  | -0.691095000 | -0.357186000 |
| C | 5.027881000  | -0.767722000 | -0.237080000 |
| C | 5.015682000  | 0.277164000  | 0.723256000  |
| C | 3.859837000  | -1.247413000 | -0.775468000 |
| H | 5.954589000  | 0.633077000  | 1.128600000  |
| H | 3.870290000  | -2.043305000 | -1.510043000 |
| C | 3.836574000  | 0.839100000  | 1.143647000  |
| H | 3.829462000  | 1.635603000  | 1.877541000  |
| C | 2.630307000  | 0.360676000  | 0.609900000  |
| H | 5.975798000  | -1.189599000 | -0.546622000 |
| O | 0.797412000  | -1.850999000 | -1.493946000 |
| O | 0.745479000  | 1.559833000  | 1.642792000  |
| C | -3.415003000 | -1.017379000 | 0.803701000  |
| H | -2.654180000 | -0.962230000 | 1.579710000  |
| C | -3.212286000 | -2.235583000 | -0.079959000 |
| C | -4.802309000 | -0.955548000 | 1.429250000  |

|   |              |              |              |
|---|--------------|--------------|--------------|
| H | -4.91226000  | -0.09649000  | 2.090178000  |
| H | -5.582616000 | -0.921673000 | 0.666979000  |
| H | -4.948882000 | -1.861883000 | 2.017106000  |
| H | -3.964027000 | -2.272570000 | -0.869181000 |
| H | -3.322166000 | -3.128557000 | 0.537791000  |
| H | -2.221170000 | -2.256712000 | -0.530035000 |
| C | -1.841182000 | 2.685898000  | -1.642625000 |
| H | -1.125480000 | 3.336824000  | -2.129837000 |
| H | -2.528740000 | 2.253171000  | -2.366488000 |
| H | -2.370163000 | 3.213921000  | -0.851790000 |

### Product of isopropyl radical addition to dimethyl thionocarbonate

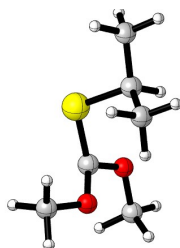

SCF Energy = -785.076797325  
 Zero-point correction = 0.186888  
 Thermal correction to Energy = 0.199197  
 Thermal correction to Enthalpy = 0.200142  
 Thermal correction to Gibbs Free Energy = 0.147284  
 Sum of electronic and zero-point Energies = -784.889909  
 Sum of electronic and thermal Energies = -784.877600  
 Sum of electronic and thermal Enthalpies = -784.876656  
 Sum of electronic and thermal Free Energies = -784.929513

|   |              |              |              |
|---|--------------|--------------|--------------|
| S | -0.640604000 | 0.070832000  | -1.072466000 |
| C | 0.978292000  | 0.121970000  | -0.427139000 |
| O | 1.511761000  | -0.902473000 | 0.288219000  |
| O | 1.364448000  | 1.328038000  | 0.043055000  |
| C | -1.737523000 | 0.417075000  | 0.379589000  |
| H | -1.383312000 | 1.359546000  | 0.798499000  |
| C | -1.657352000 | -0.678757000 | 1.428367000  |
| C | -3.146156000 | 0.599060000  | -0.165589000 |
| H | -3.191489000 | 1.401337000  | -0.902826000 |
| H | -3.506646000 | -0.320548000 | -0.632736000 |
| H | -3.826174000 | 0.847708000  | 0.651757000  |
| H | -1.993010000 | -1.632474000 | 1.015401000  |
| H | -2.302157000 | -0.428127000 | 2.274895000  |
| H | -0.640981000 | -0.802609000 | 1.802204000  |
| C | 2.713333000  | 1.448241000  | 0.483213000  |
| H | 3.402377000  | 1.076644000  | -0.278247000 |
| H | 2.880259000  | 2.510707000  | 0.642804000  |
| H | 2.874452000  | 0.906313000  | 1.414925000  |
| C | 1.346395000  | -2.209937000 | -0.233737000 |
| H | 1.669276000  | -2.255085000 | -1.276040000 |
| H | 1.971022000  | -2.859720000 | 0.374553000  |
| H | 0.304452000  | -2.527433000 | -0.164134000 |

### Product of isopropyl radical addition to phenyl methyl thionocarbonate

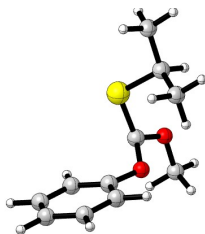

SCF Energy = -976.817152447  
 Zero-point correction = 0.240256  
 Thermal correction to Energy = 0.255301  
 Thermal correction to Enthalpy = 0.256246  
 Thermal correction to Gibbs Free Energy = 0.195720  
 Sum of electronic and zero-point Energies = -976.576896  
 Sum of electronic and thermal Energies = -976.561851  
 Sum of electronic and thermal Enthalpies = -976.560907  
 Sum of electronic and thermal Free Energies = -976.621432

|   |              |              |              |
|---|--------------|--------------|--------------|
| S | -1.412972000 | -0.307954000 | -1.095233000 |
| C | -0.719645000 | 1.080284000  | -0.304937000 |
| O | 0.273651000  | 0.928038000  | 0.631102000  |
| C | 1.435827000  | 0.293832000  | 0.270203000  |
| C | 2.021427000  | 0.471675000  | -0.974585000 |
| C | 2.035538000  | -0.502174000 | 1.233265000  |
| C | 3.221537000  | -0.165304000 | -1.251416000 |
| C | 3.238071000  | -1.128362000 | 0.945610000  |
| C | 3.834028000  | -0.965065000 | -0.297028000 |
| H | 1.541997000  | 1.102449000  | -1.711741000 |
| H | 1.552763000  | -0.625491000 | 2.193765000  |
| H | 3.682197000  | -0.029236000 | -2.221654000 |
| H | 3.707238000  | -1.751703000 | 1.696142000  |
| H | 4.771464000  | -1.457460000 | -0.520090000 |
| O | -1.576358000 | 2.061598000  | 0.027974000  |
| C | -2.539774000 | -1.050431000 | 0.171021000  |
| H | -3.259124000 | -0.272414000 | 0.428002000  |
| C | -1.791793000 | -1.497208000 | 1.415480000  |
| C | -3.260147000 | -2.201181000 | -0.517117000 |
| H | -3.808203000 | -1.864931000 | -1.398070000 |
| H | -2.553434000 | -2.975897000 | -0.823117000 |
| H | -3.972751000 | -2.650639000 | 0.177251000  |
| H | -1.036411000 | -2.244827000 | 1.165285000  |
| H | -2.494574000 | -1.941550000 | 2.125116000  |
| H | -1.296895000 | -0.661078000 | 1.908238000  |
| C | -1.004380000 | 3.270271000  | 0.525474000  |
| H | -0.232210000 | 3.633161000  | -0.155932000 |
| H | -1.818878000 | 3.988162000  | 0.574762000  |
| H | -0.578118000 | 3.123599000  | 1.517350000  |

### Product of isopropyl radical addition to dimethyl xanthate

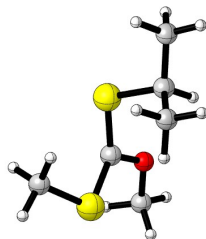

SCF Energy = -1108.05953748  
 Zero-point correction = 0.182939  
 Thermal correction to Energy = 0.195933  
 Thermal correction to Enthalpy = 0.196877  
 Thermal correction to Gibbs Free Energy = 0.141827  
 Sum of electronic and zero-point Energies = -1107.876598  
 Sum of electronic and thermal Energies = -1107.863605  
 Sum of electronic and thermal Enthalpies = -1107.862660  
 Sum of electronic and thermal Free Energies = -1107.917710

|   |              |              |              |
|---|--------------|--------------|--------------|
| S | -0.797486000 | 0.133220000  | -1.019110000 |
| C | 0.767594000  | 0.367541000  | -0.329887000 |
| S | 1.732400000  | -0.896811000 | 0.418742000  |
| O | 1.052885000  | 1.645746000  | 0.025565000  |
| C | -1.986972000 | 0.381105000  | 0.378852000  |
| H | -1.739641000 | 1.350644000  | 0.812321000  |

|   |              |              |              |
|---|--------------|--------------|--------------|
| C | -1.864985000 | -0.706111000 | 1.431683000  |
| C | -3.376396000 | 0.439204000  | -0.238305000 |
| H | -3.457790000 | 1.241868000  | -0.972037000 |
| H | -3.623928000 | -0.504834000 | -0.729929000 |
| H | -4.117934000 | 0.613144000  | 0.543858000  |
| H | -2.098431000 | -1.683682000 | 1.004161000  |
| H | -2.568430000 | -0.512611000 | 2.245794000  |
| H | -0.860553000 | -0.746389000 | 1.853525000  |
| C | 2.407007000  | 2.003058000  | 0.271597000  |
| H | 3.046026000  | 1.696670000  | -0.559181000 |
| H | 2.416386000  | 3.086329000  | 0.365236000  |
| H | 2.776326000  | 1.559087000  | 1.198545000  |
| C | 1.266228000  | -2.340729000 | -0.545068000 |
| H | 1.460088000  | -2.174957000 | -1.602892000 |
| H | 1.893334000  | -3.153291000 | -0.181214000 |
| H | 0.217982000  | -2.584899000 | -0.390055000 |

## References

- [1] E. A.-H. Yeh, E. Kumli, K. Damodaran, D. P. Curran, *J. Am. Chem. Soc.*, 2013, **135**, 1577–1584.
- [2] K. Yue Jen, M. P. Cava, *J. Org. Chem.*, 1983, **48**, 1449–1451.
- [3] G. Barany, A. L. Schroll, A. W. Mott, D. A. Halsrud, *J. Org. Chem.*, 1983, **48**, 4750–4761.
- [4] H. Seki, S. Xue, S. Pellett, P. Šilhár, E. A. Johnson, K. D. Janda, *J. Am. Chem. Soc.*, 2016, **138**, 5568–5575.
- [5] S. Bhattacharjee, W. Liu, W.-H. Wang, I. Weitzhandler, X. Li, Y. Qi, J. Liu, Y. Pang, D. F. Hunt, A. Chilkoti, *ChemBioChem*, 2015, **16**, 2451–2455.
- [6] M. Ruiz, P. López-Alvarado, J. C. Menéndez, *Org. Biomol. Chem.*, 2010, **8**, 4521–4523.
- [7] K. S. Kanyiva, S. Makino, T. Shibata, *Chem. Asian J.*, 2018, **13**, 496–499.
- [8] M. O. Zubkov, M. D. Kosobokov, V. V. Levin, A. D. Dilman, *Org. Lett.*, 2022, **24**, 2354–2358.
- [9] S. Klaus, W. Richard, G. Ferdinand, *Patent*, 1959, US 2872450.
- [10] P. Nesvadba, J. Benkhoff, L. Bugnon, K. Powell, T. Jung, *Patent*, 2006, WO 2006/051047.
- [11] L. I. Panferova, M. O. Zubkov, M. D. Kosobokov, A. D. Dilman, *Org. Lett.*, 2022, **24**, 8559–8563.
- [12] J. Lucien, J. Barrault, M. Guisnet, R. Maurel, *Ind. Eng. Chem. Res.*, 1978, **17**, 354–357.
- [13] T. Cao, T. Xu, R. Xu, X. Shu, S. Liao, *Nat. Commun.*, 2020, **11**, 1–8.
- [14] W. Xiong, M. Shi, Y. Lu, X. Zhang, X. Hu, Z. Tu, Y. Wu, *Chin. J. Chem. Eng.*, 2022, **50**, 197–204.
- [15] B. R. Brutiu, M. Drescher, J. Matyašovský, N. Maulide, J. Merad, A. Pinto, T. Stopka, *Chem. Sci.*, 2021, **12**, 7770–7774.
- [16] M. Jean, J. Renault, P. van de Weghe, N. Asao, *Tetrahedron Lett.*, 2010, **51**, 378–381.
- [17] X. Ning, Y. Guo, X. Wang, X. Ma, Ch. Tian, X. Shi, R. Zhu, C. Cheng, Y. Du, Zh. Ma, Zh. Zhang, J. Liu, *J. Med. Chem.*, 2014, **57**, 4302–4312.
- [18] B. A. Worp, M. D. Kosobokov, A. D. Dilman, *ChemPhotoChem*, 2021, **5**, 565–570.
- [19] J. A. Andrews, L. R. E. Pantaine, C. F. Palmer, D. L. Poole, M. C. Willis, *Org. Lett.*, 2021, **23**, 8488–8493.
- [20] D. C. K. Chan, A. A. Whipp, *Patent*, 1978, US 4107332.
- [21] Z.-D. Chen, X. Zhou, J.-T. Yi, H.-J. Diao, Q.-L. Chen, G. Lu, J. Weng, *Org. Lett.*, 2022, **24**, 2474–2478.
- [22] Zh. Ma, Y. Liu, X. Ma, X. Hu, Y. Guo, Q.-Y. Chen, Ch. Liu, *Org. Chem. Front.*, 2022, **9**, 1115–1120.



- [23] CrysAlisPro. Version 1.171.41. *Rigaku Oxford Diffraction*, 2021.
- [24] G. M. Sheldrick, *Acta Cryst.*, 2015, **A71**, 3–8.
- [25] G. M. Sheldrick, *Acta Cryst.*, 2015, **C71**, 3–8.
- [26] O. V. Dolomanov, L. J. Bourhis, R. J. Gildea, J. A. K. Howard, H. Puschmann, *J. Appl. Cryst.*, 2009, **42**, 229–341.
- [27] Gaussian 09, Revision D.01, M. J. Frisch, G. W. Trucks, H. B. Schlegel, G. E. Scuseria, M. A. Robb, J. R. Cheeseman, G. Scalmani, V. Barone, B. Mennucci, G. A. Petersson, H. Nakatsuji, M. Caricato, X. Li, H. P. Hratchian, A. F. Izmaylov, J. Bloino, G. Zheng, J. L. Sonnenberg, M. Hada, M. Ehara, K. Toyota, R. Fukuda, J. Hasegawa, M. Ishida, T. Nakajima, Y. Honda, O. Kitao, H. Nakai, T. Vreven, J. A. Montgomery, Jr., J. E. Peralta, F. Ogliaro, M. Bearpark, J. J. Heyd, E. Brothers, K. N. Kudin, V. N. Staroverov, T. Keith, R. Kobayashi, J. Normand, K. Raghavachari, A. Rendell, J. C. Burant, S. S. Iyengar, J. Tomasi, M. Cossi, N. Rega, J. M. Millam, M. Klene, J. E. Knox, J. B. Cross, V. Bakken, C. Adamo, J. Jaramillo, R. Gomperts, R. E. Stratmann, O. Yazyev, A. J. Austin, R. Cammi, C. Pomelli, J. W. Ochterski, S35 R. L. Martin, K. Morokuma, V. G. Zakrzewski, G. A. Voth, P. Salvador, J. J. Dannenberg, S. Dapprich, A. D. Daniels, O. Farkas, J. B. Foresman, J. V. Ortiz, J. Cioslowski, and D. J. Fox, Gaussian, Inc., Wallingford CT, 2013.
- [28] CYLview, 1.0b; Legault, C. Y., Université de Sherbrooke, 2009 (<http://www.cylview.org>).
- [29] R. A. Marcus, N. Sutin, *Biochim. Biophys. Acta - Bioenerg.*, 1985, **811**, 265–322.
- [30] T. O. Paulisch, F. Strieth-Kalthoff, C. Henkel, L. Pitzer, D. M. Guldi, F. Glorius, *Chem. Sci.*, 2020, **11**, 731–736.
- [31] S. F. Nelsen, S. C. Blackstock, Y. Kim, *J. Am. Chem. Soc.*, 1987, **109**, 677–682.
- [32] O. López-Estrada, H. G. Laguna, C. Barrueta-Flores, C. Amador-Bedolla, *ACS Omega*, 2018, **3**, 2130–2140.
- [33] V. D. Nguyen, R. Trevino, S. G. Greco, H. D. Arman, O. V. Larionov, *ACS Catal.*, 2022, **12**, 8729–8739.
- [34] A. Pedretti, A. Mazzolari, S. Gervasoni, L. Fumagalli, G. Vistoli, *Bioinformatics*, 2021, **37**, 1174–1175.

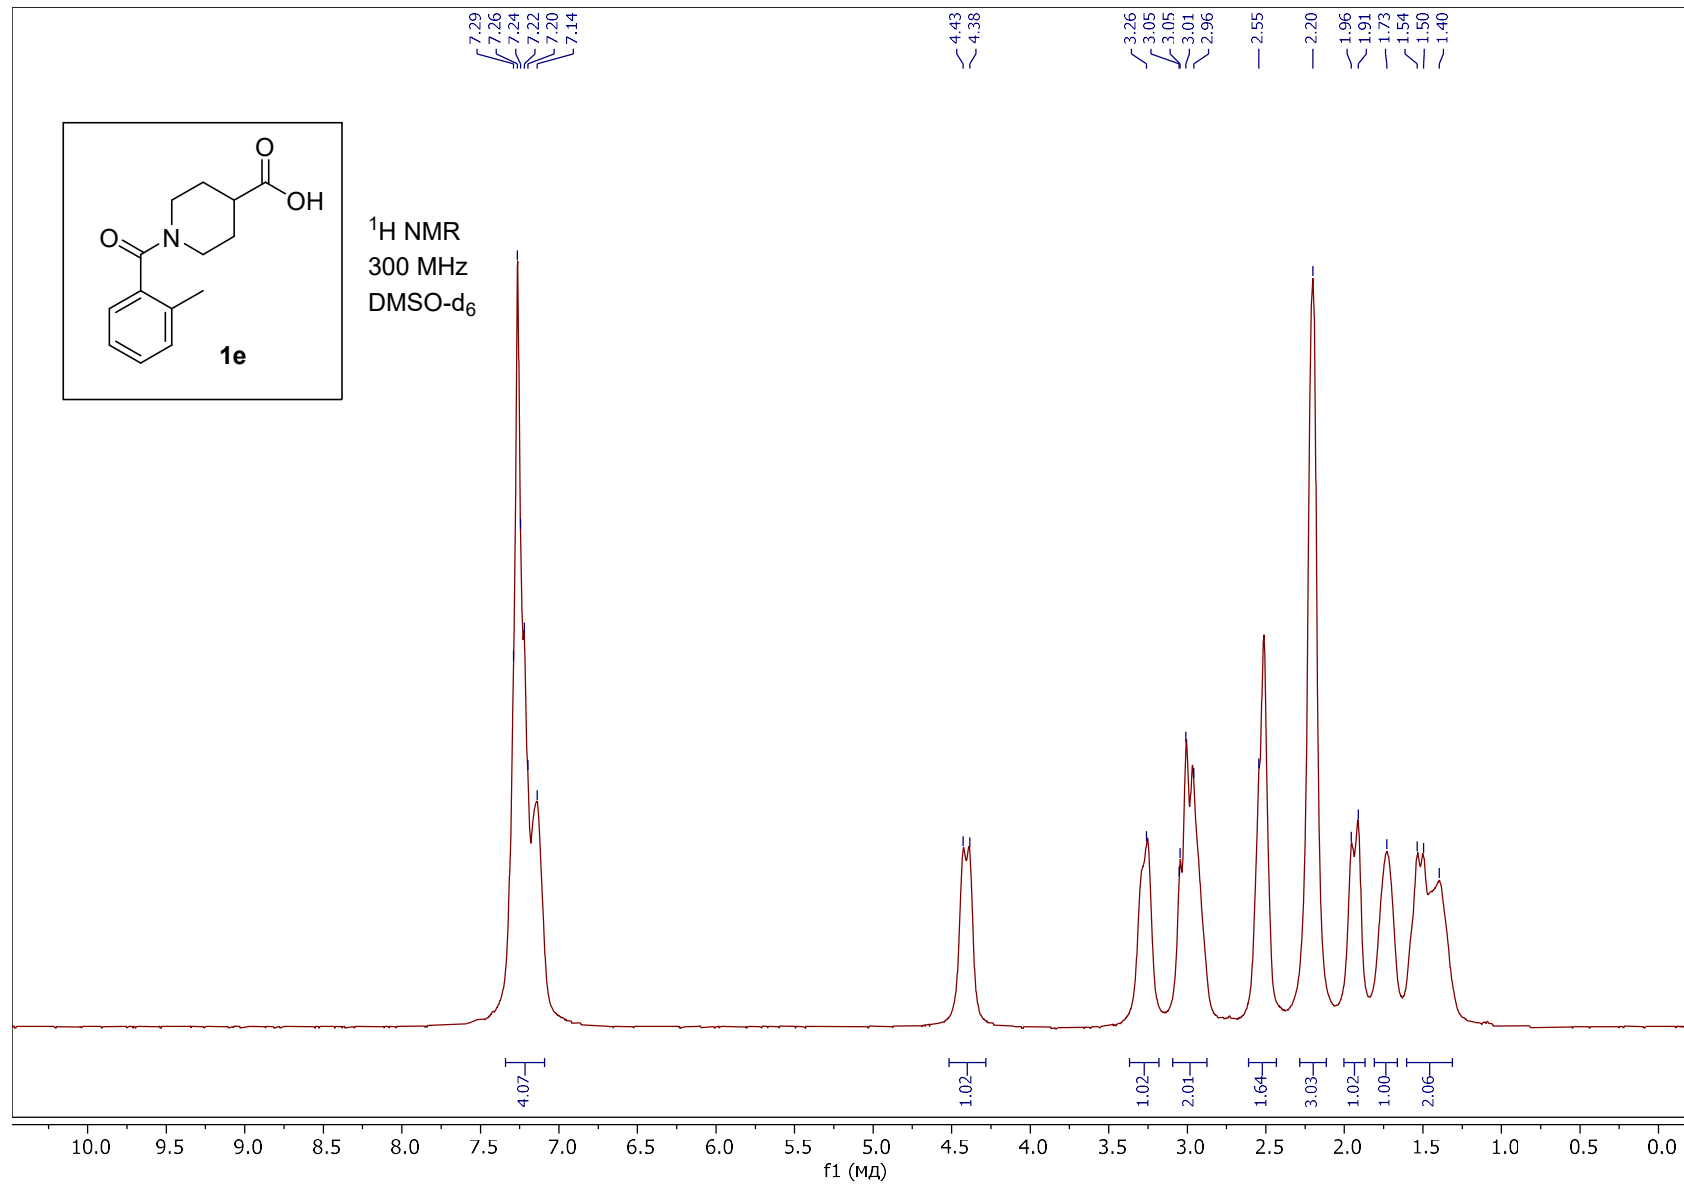

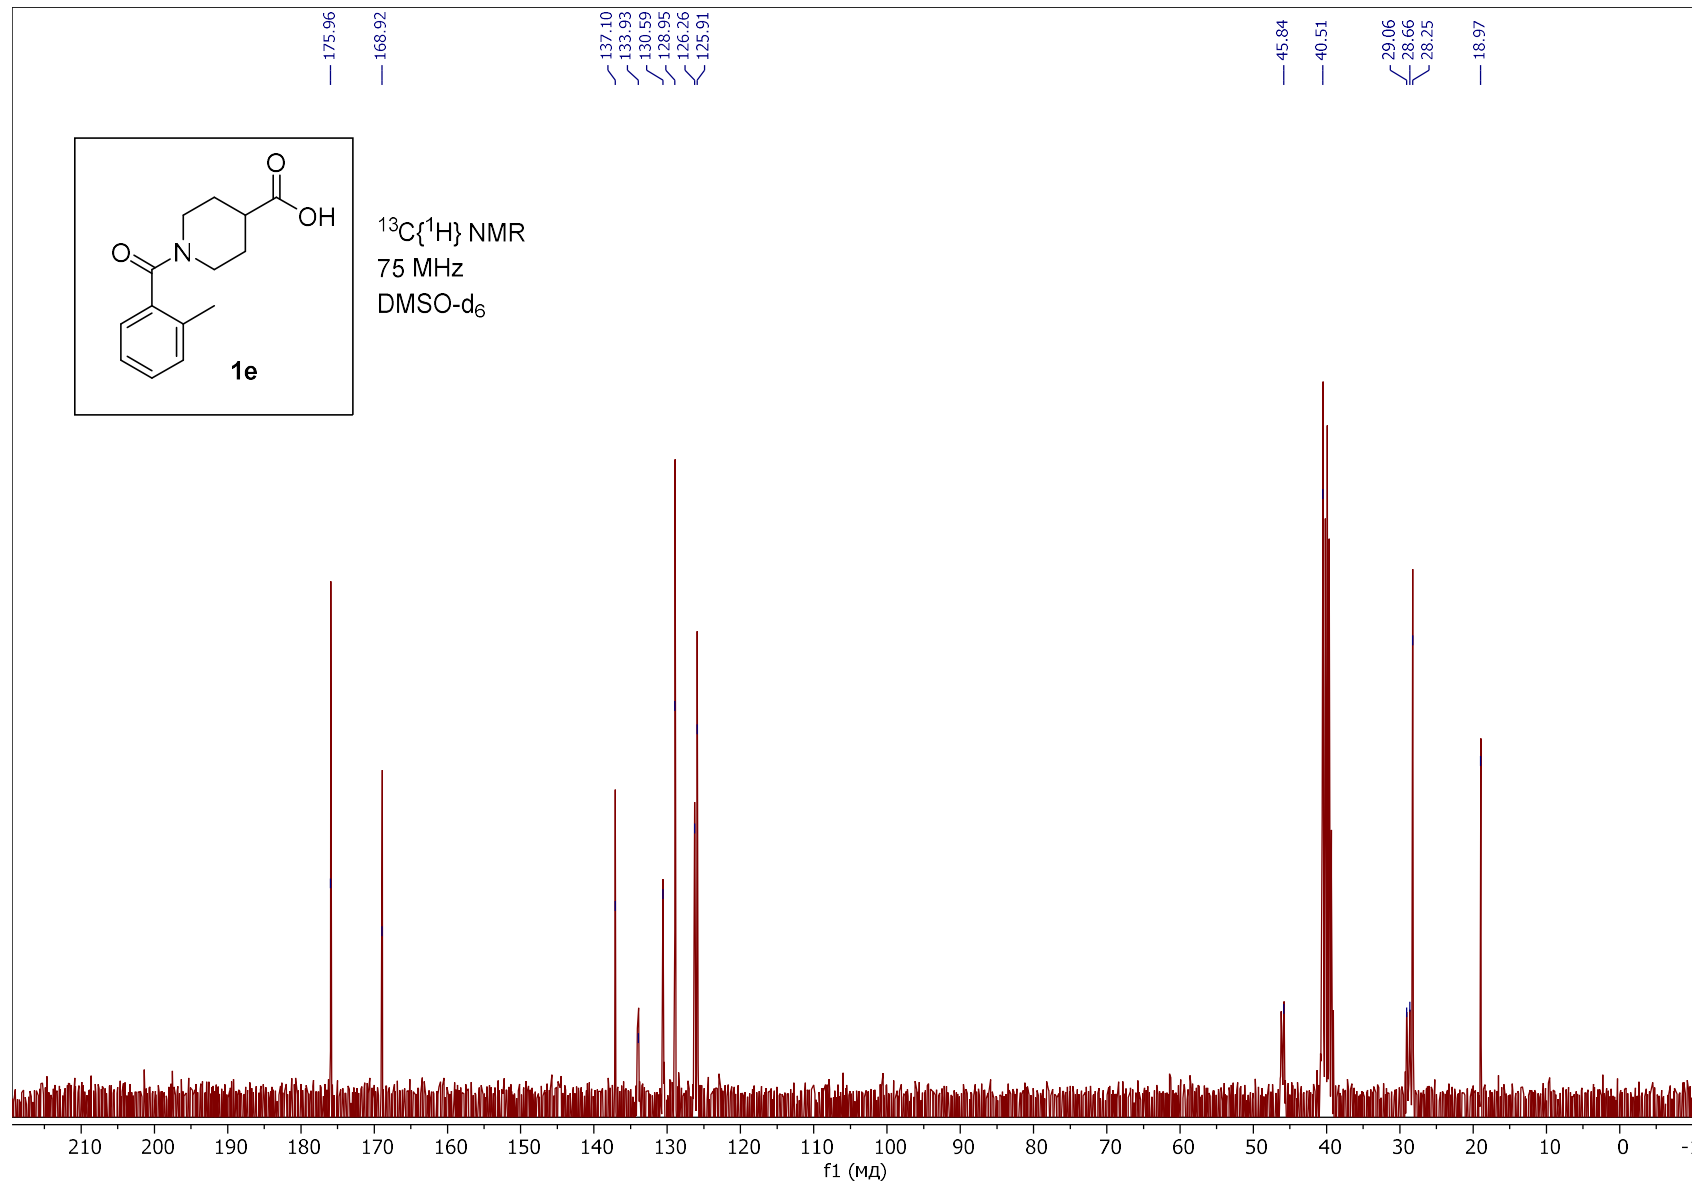

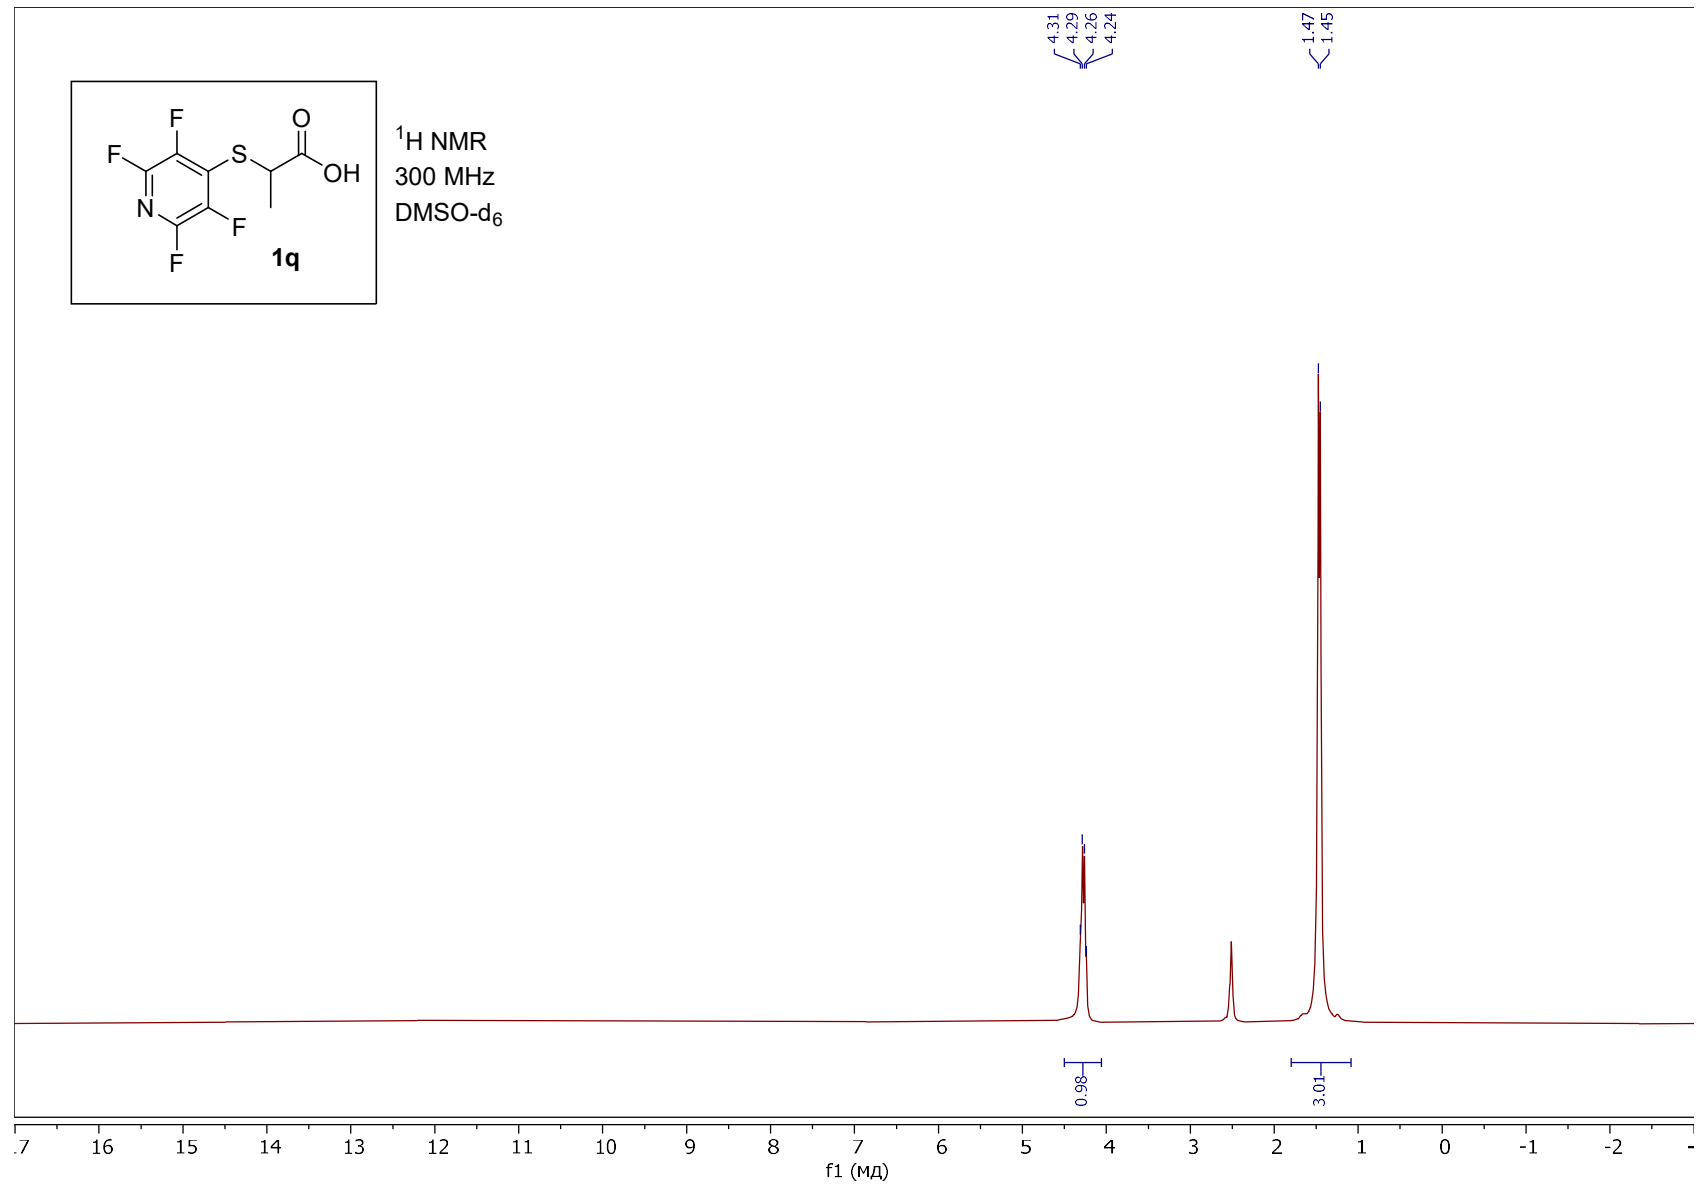

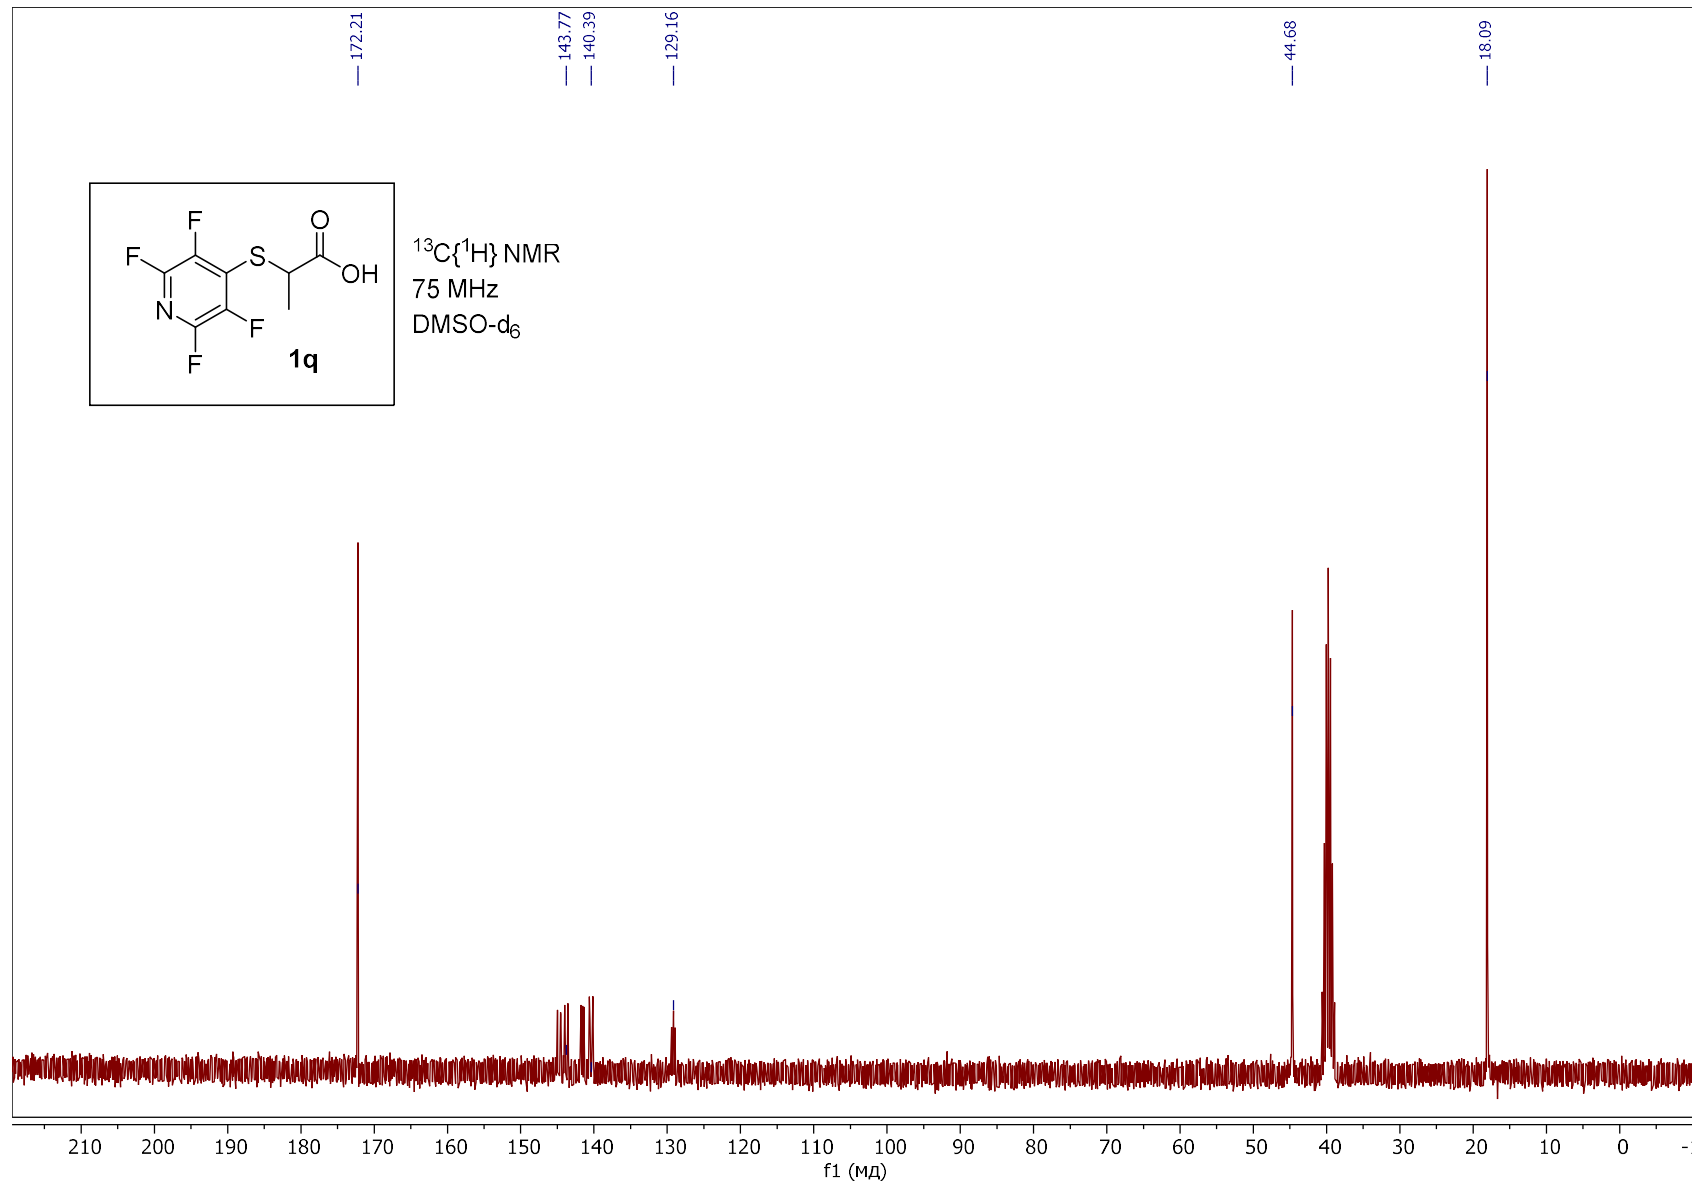

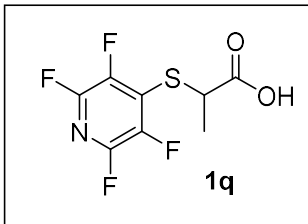

$^{19}\text{F}$  NMR  
272 MHz  
DMSO- $d_6$

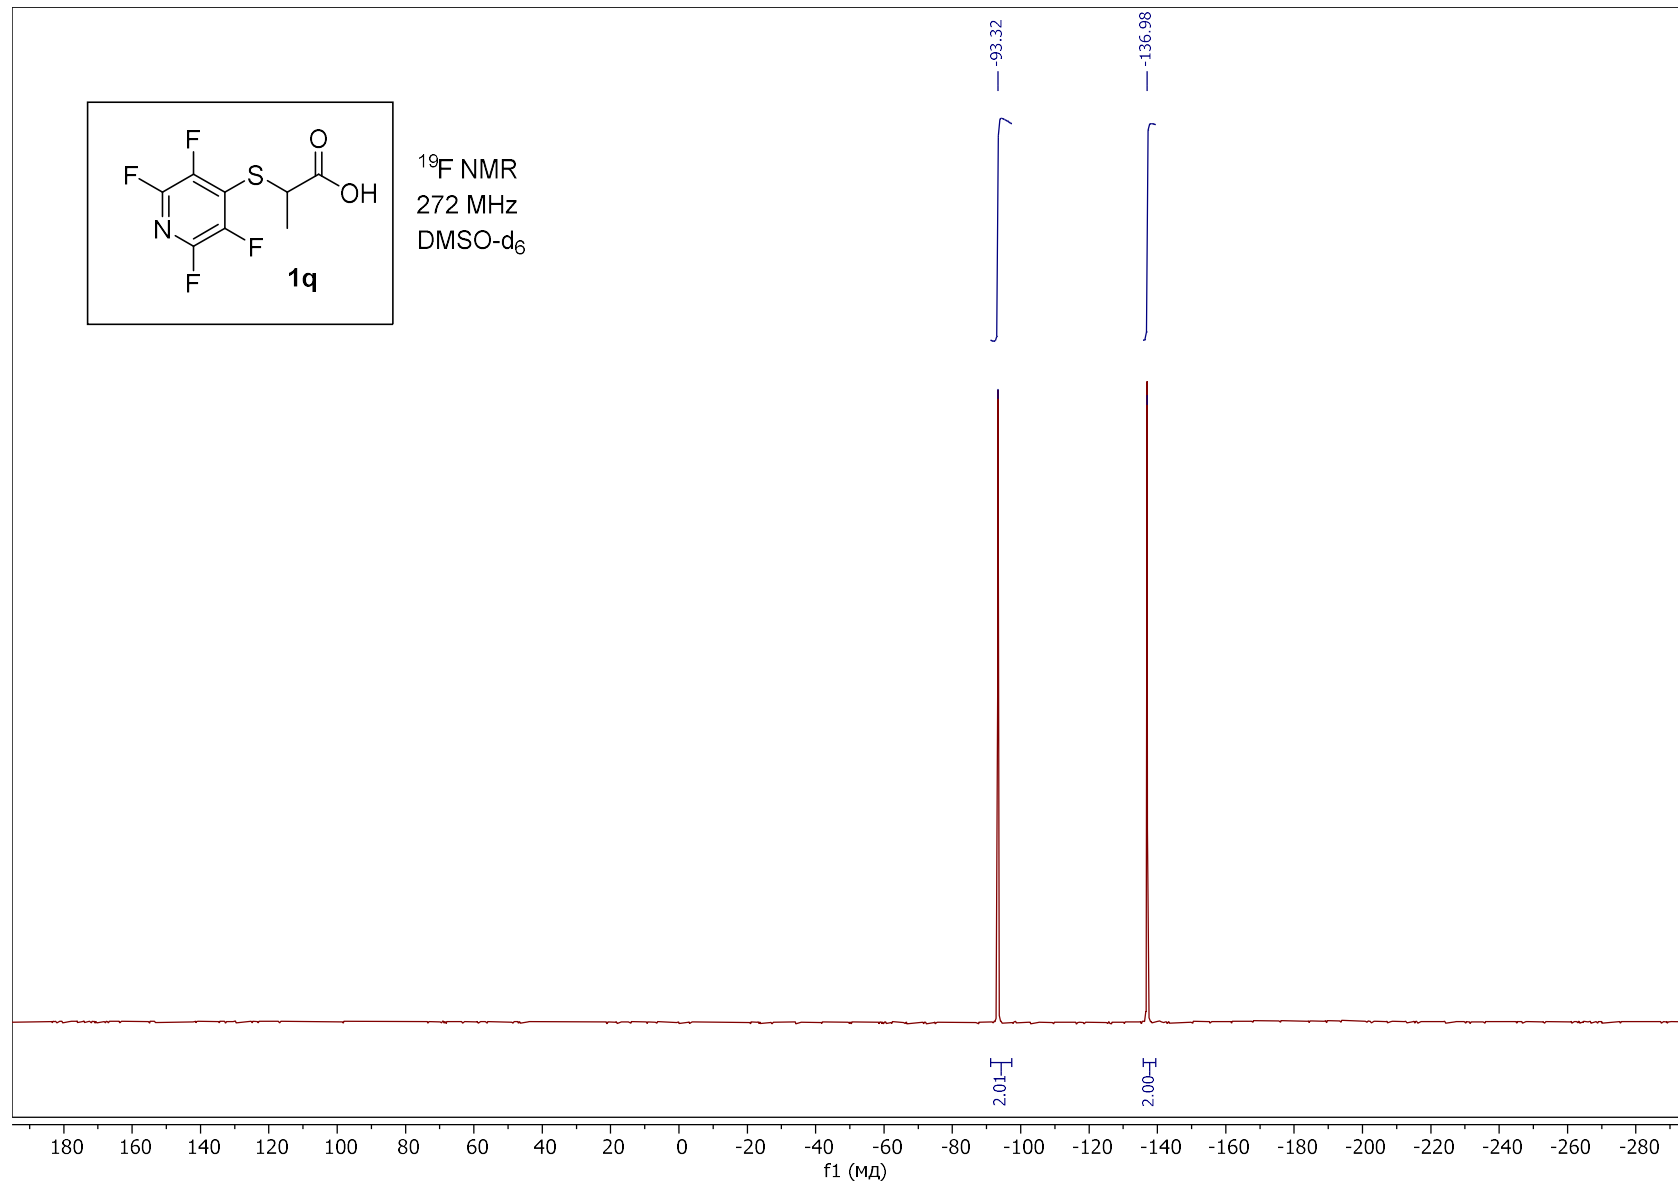

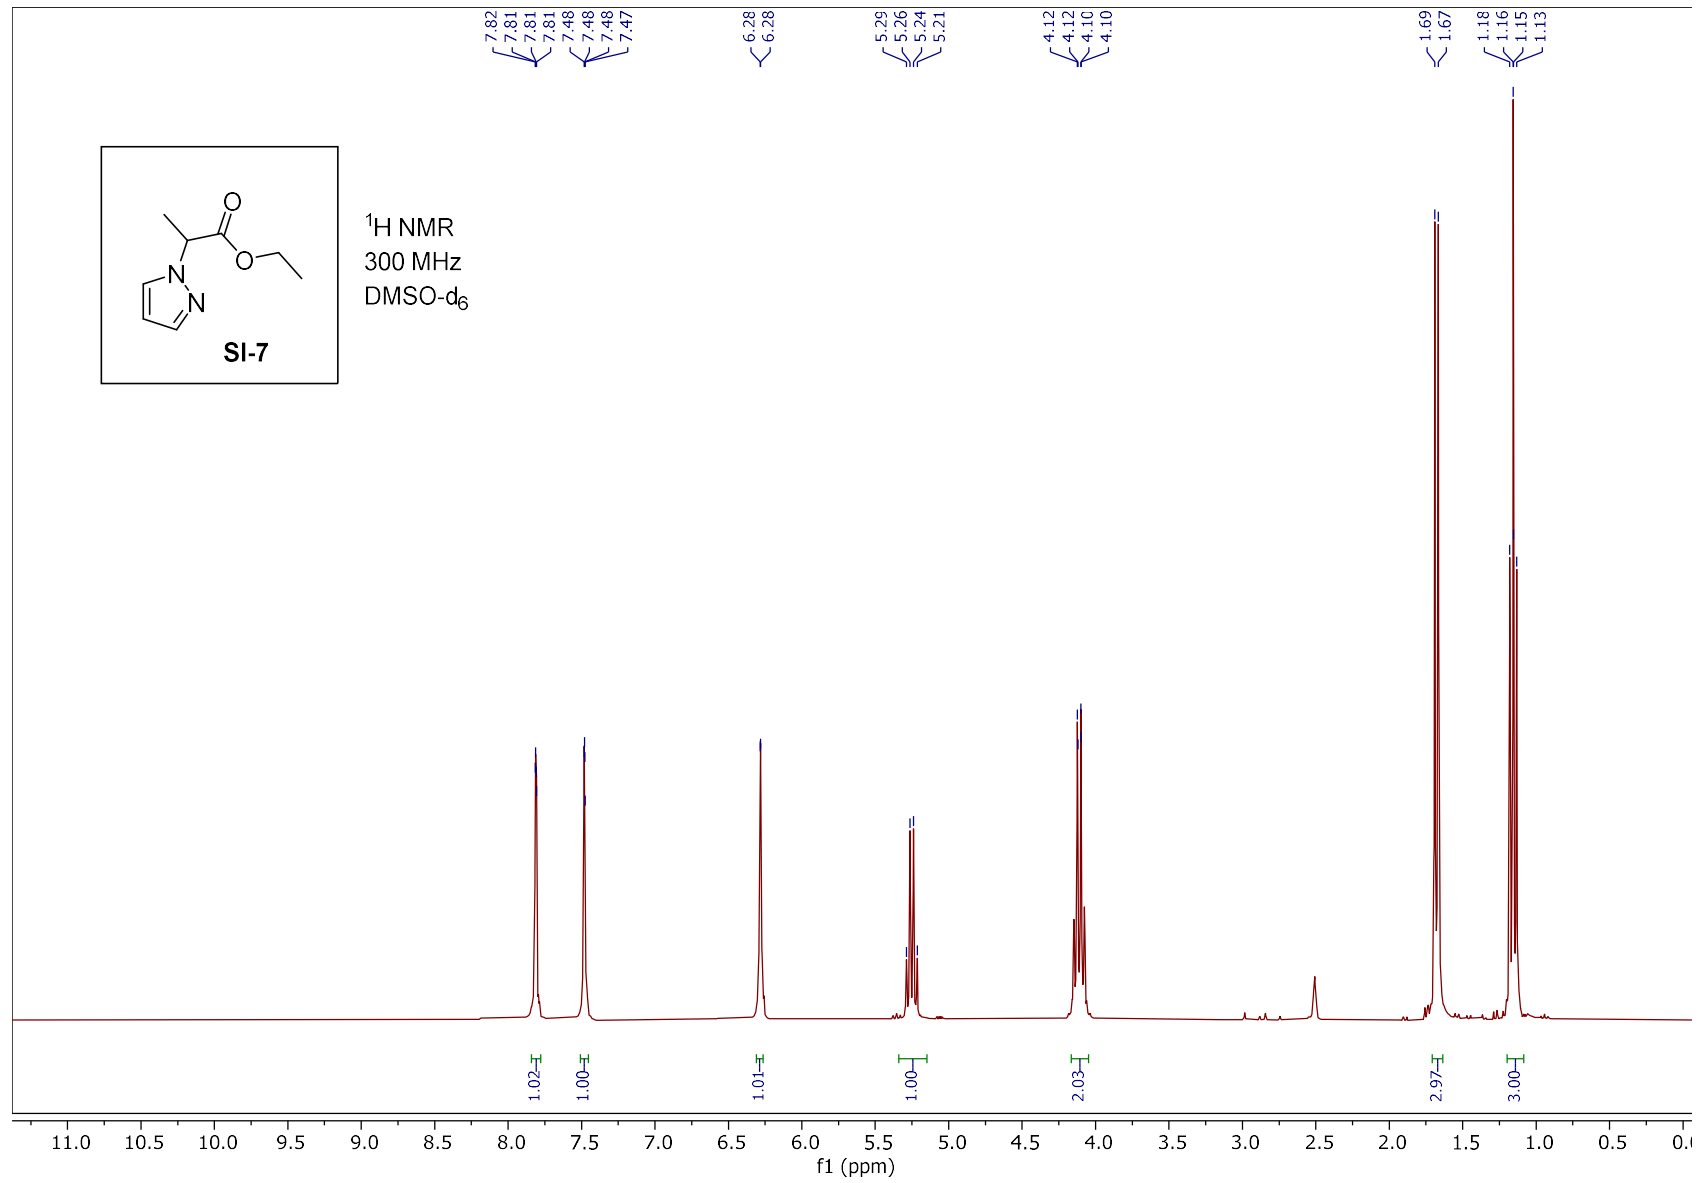

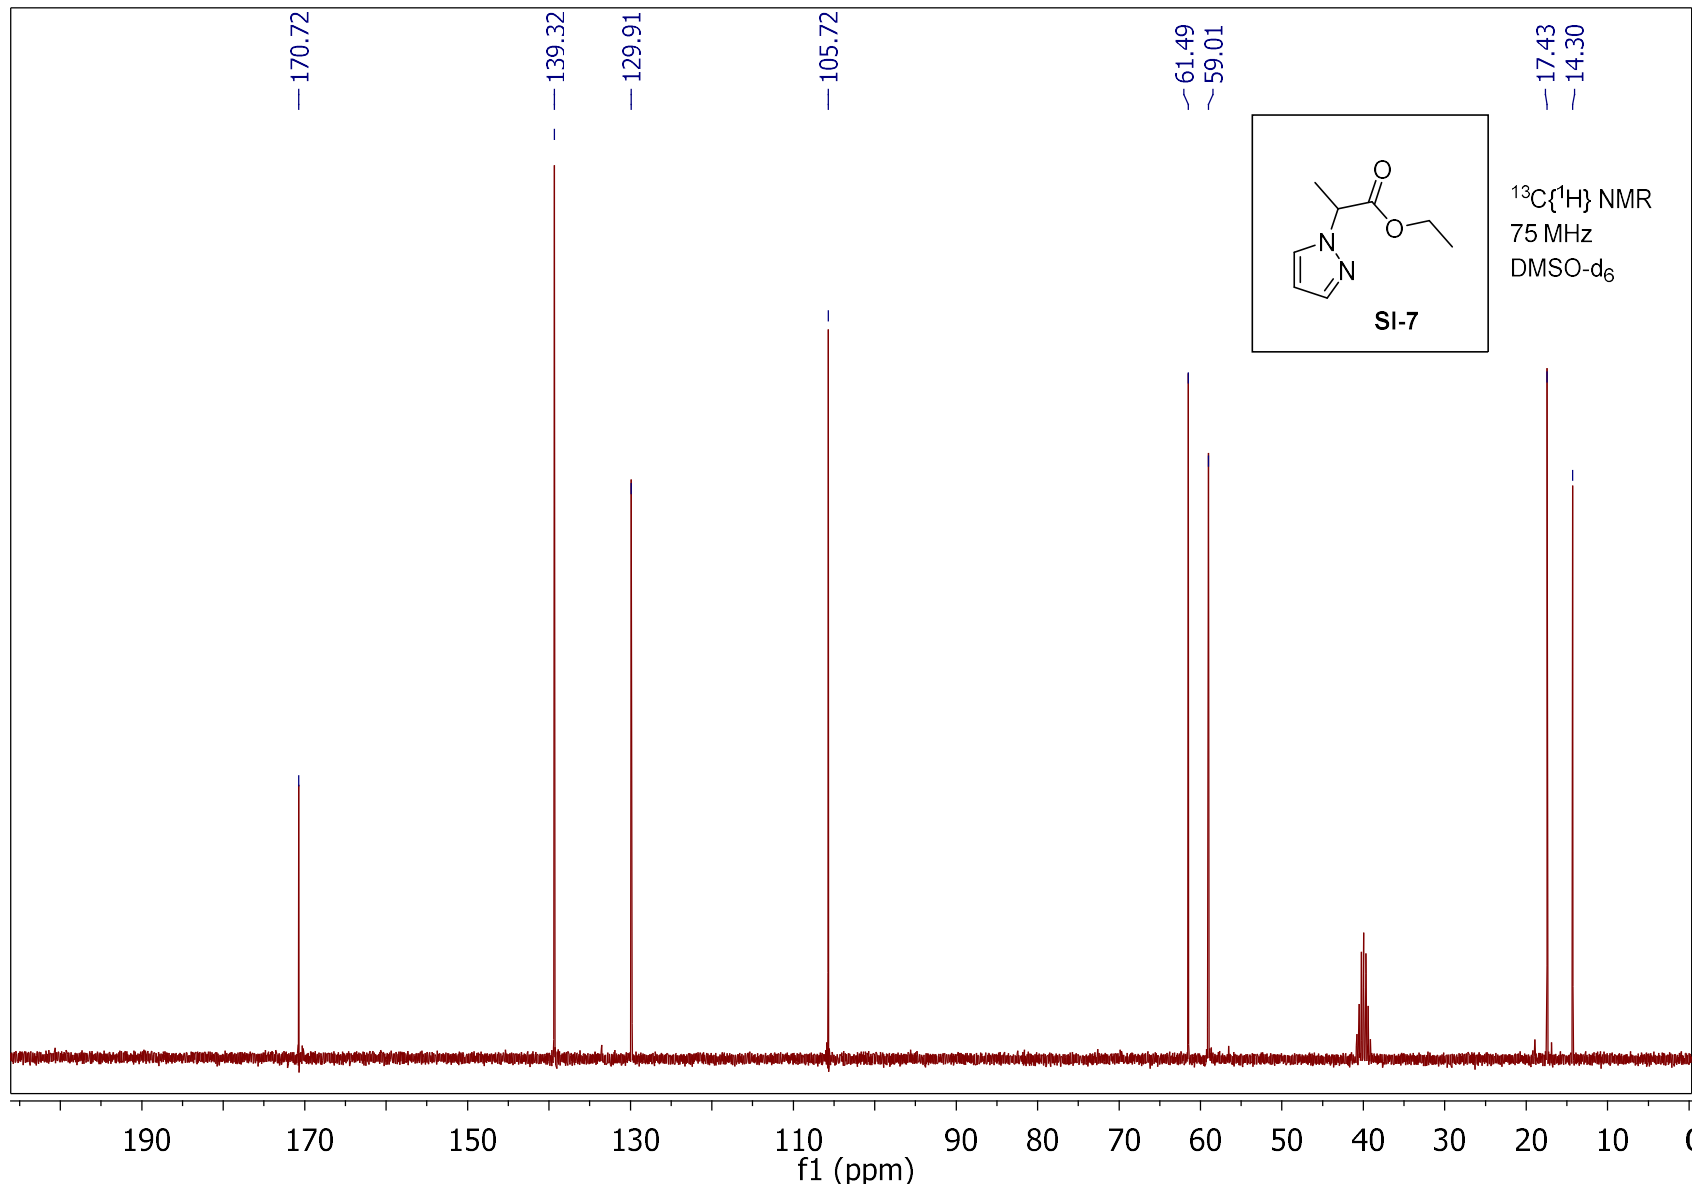



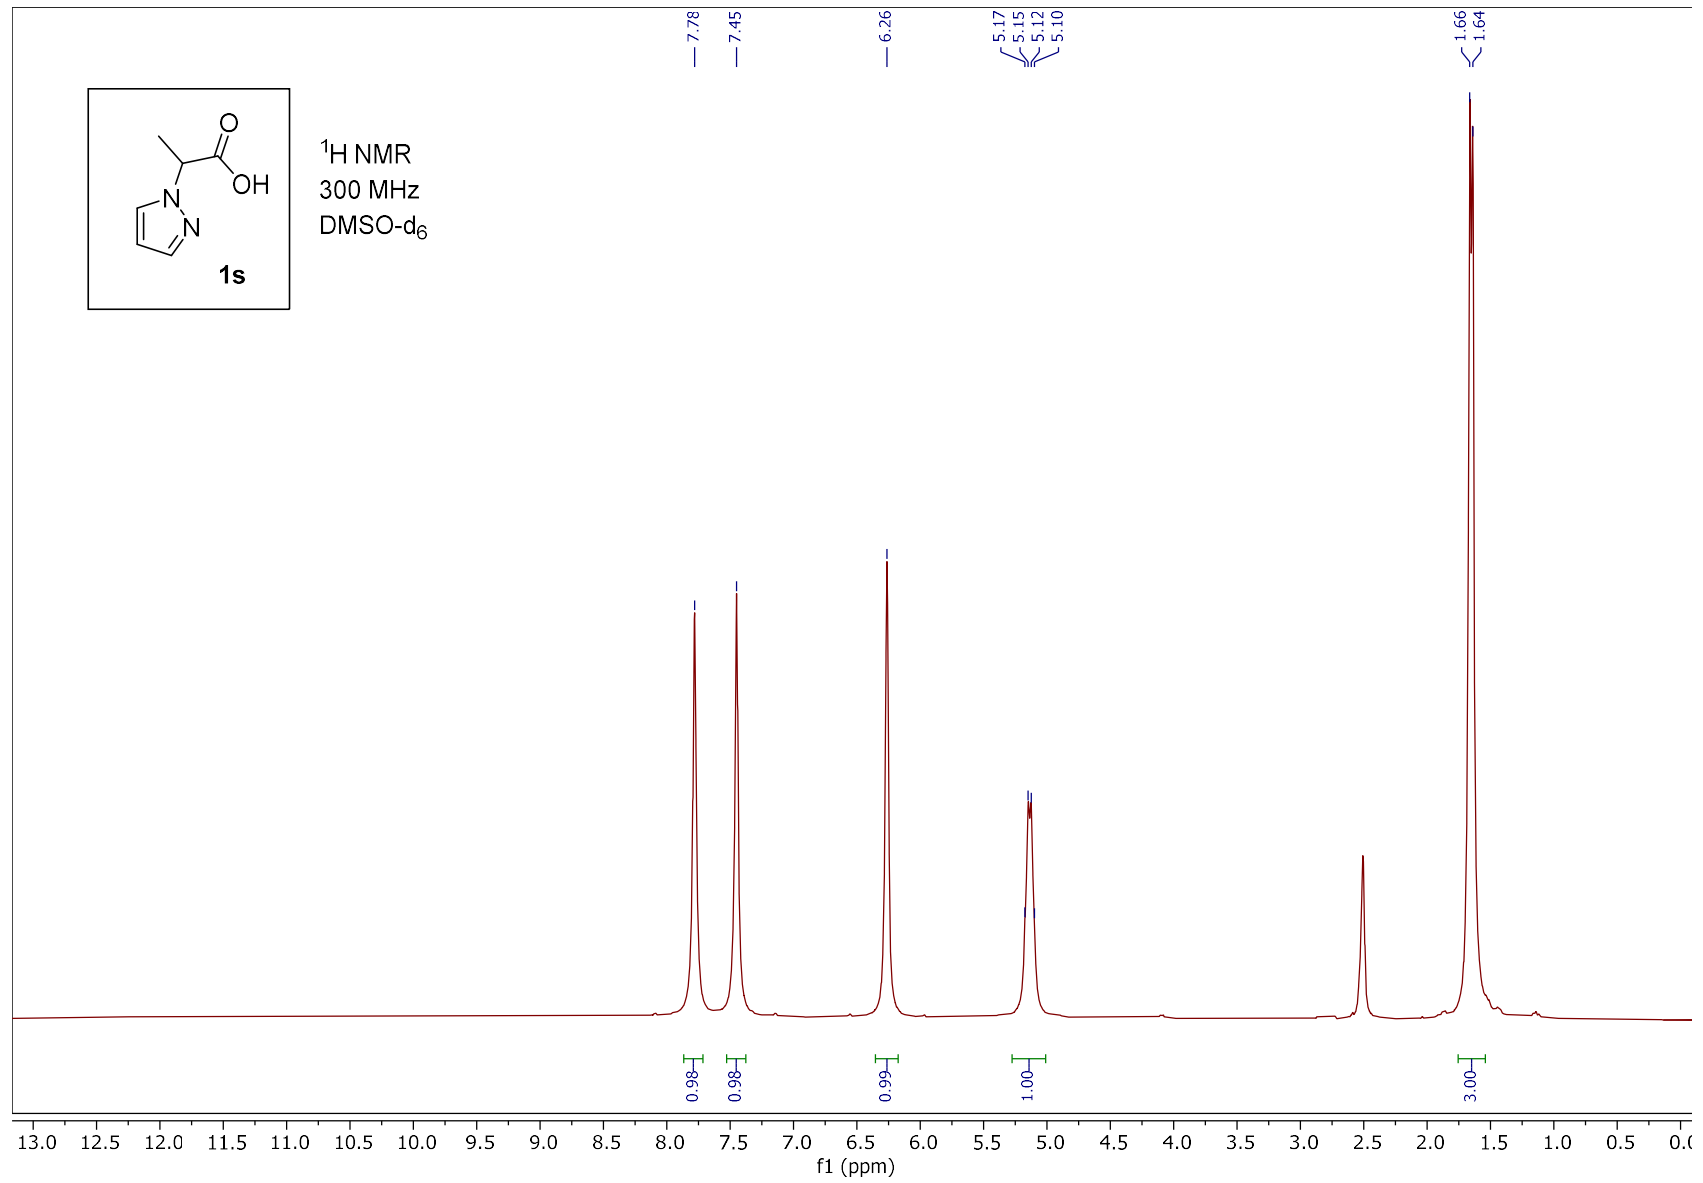

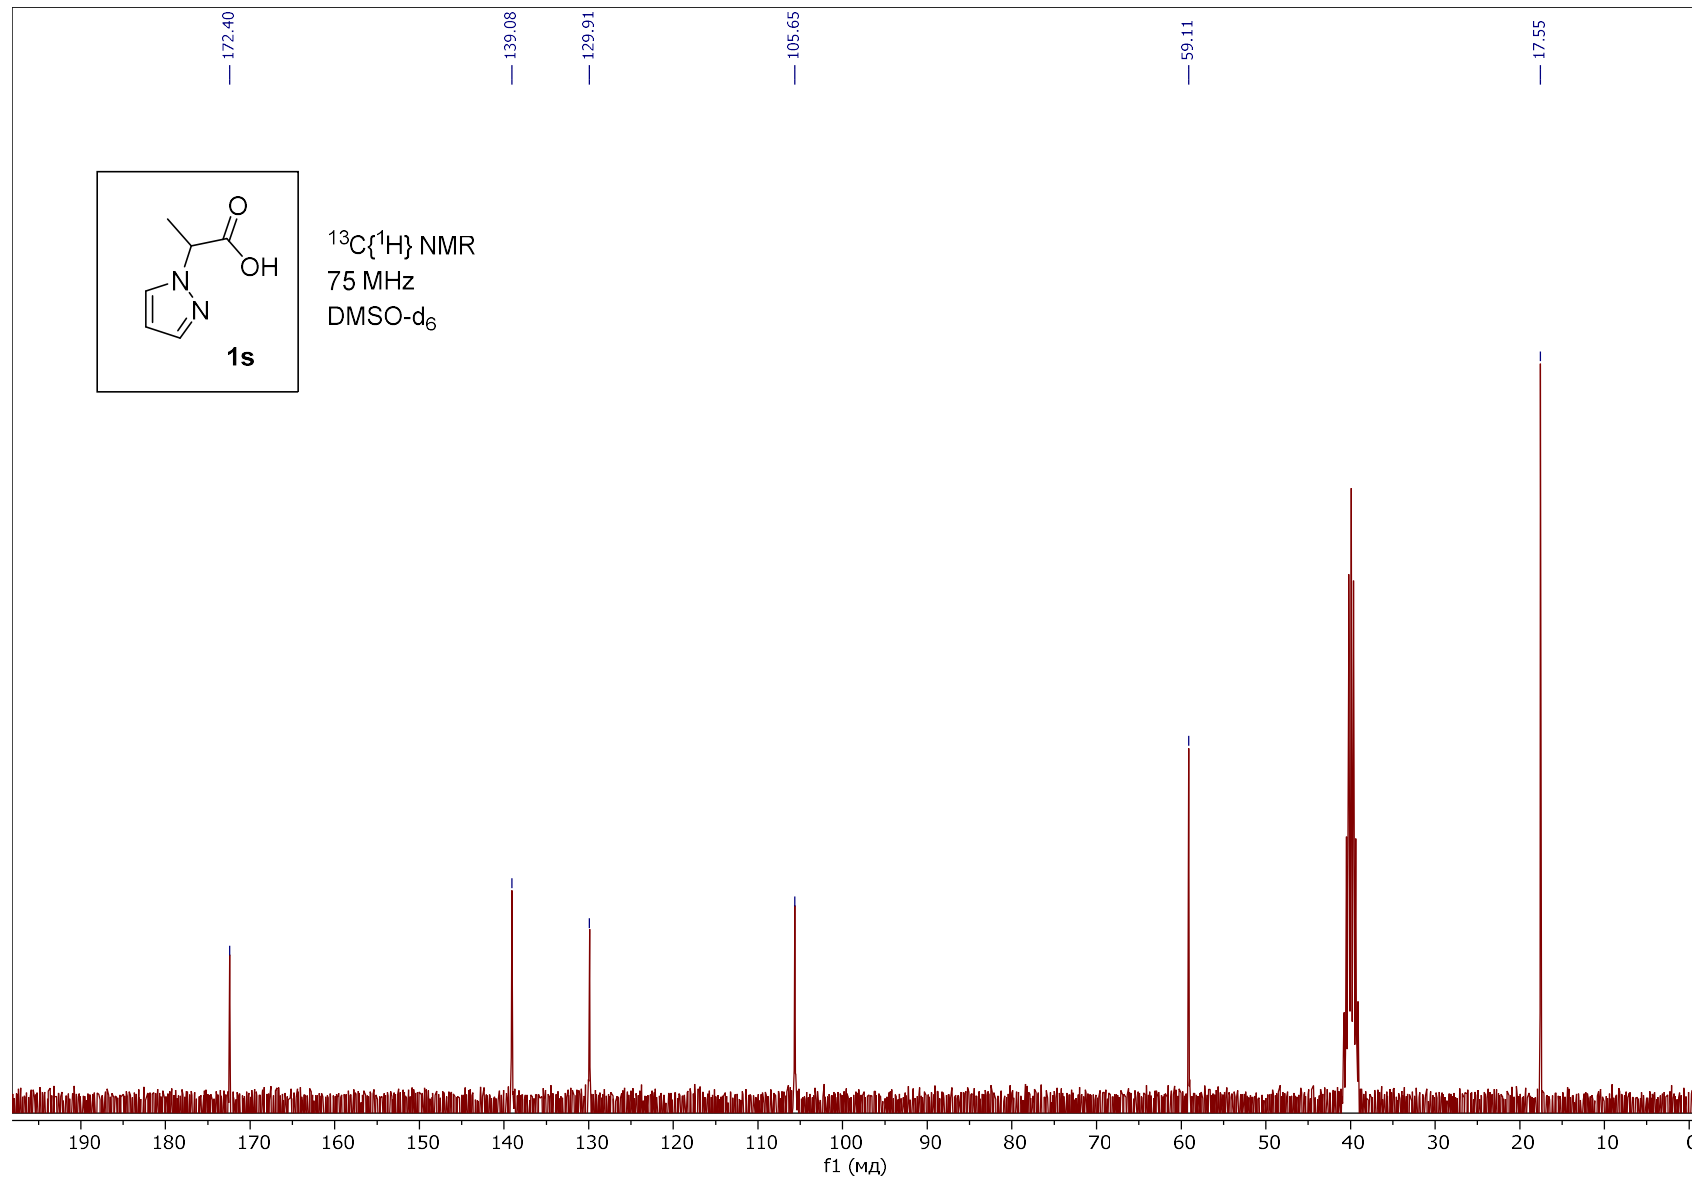

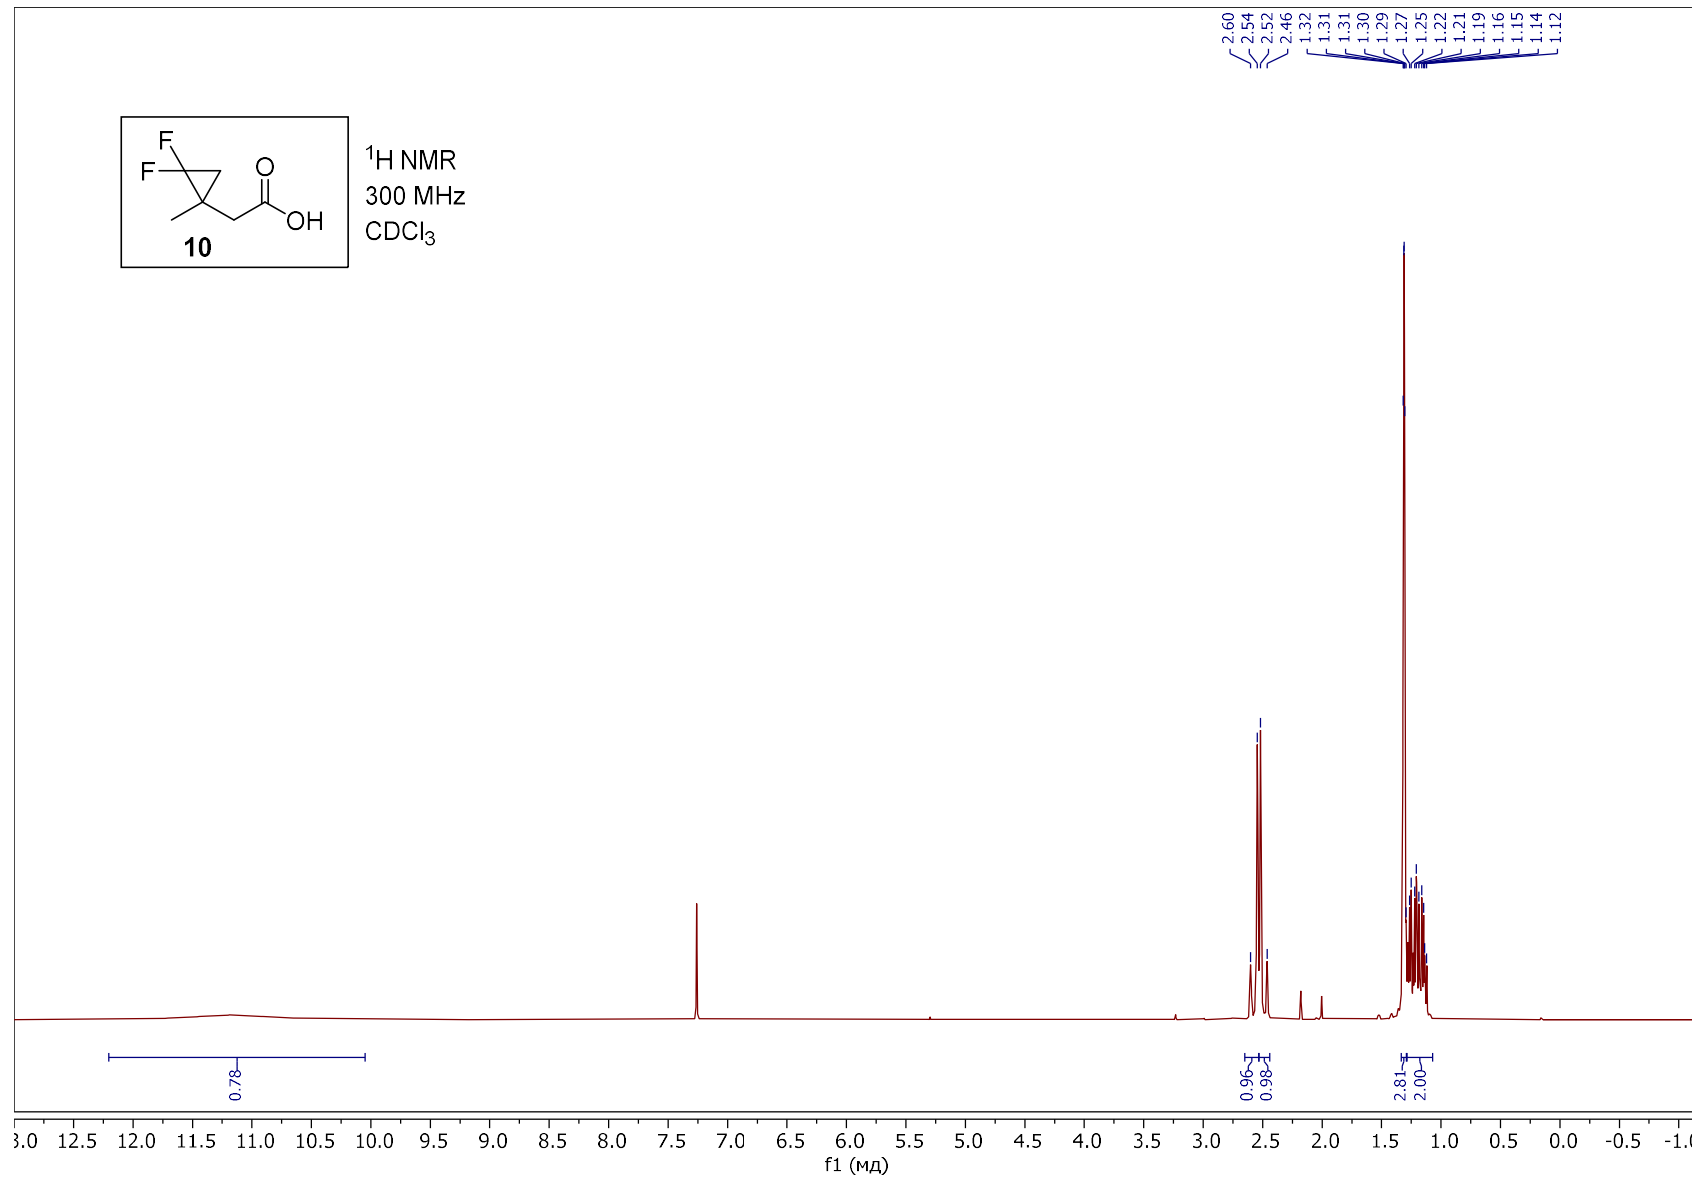

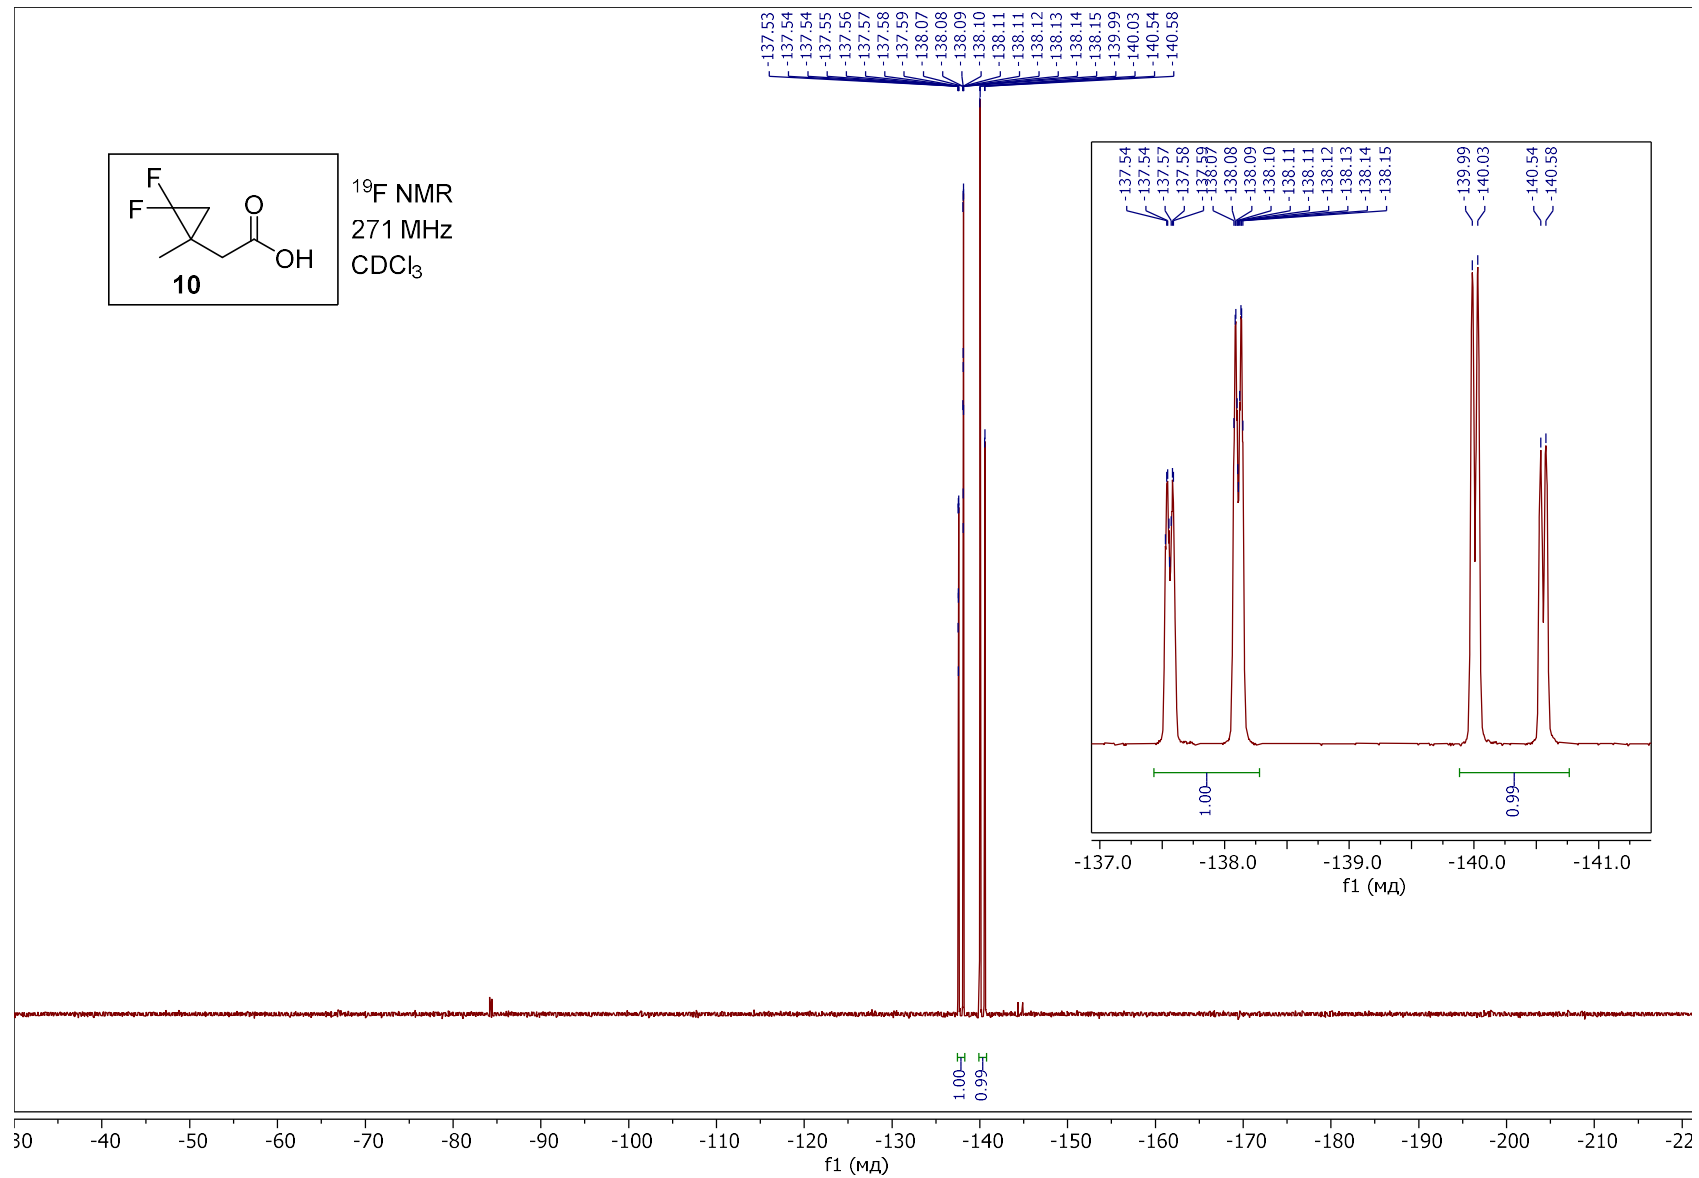

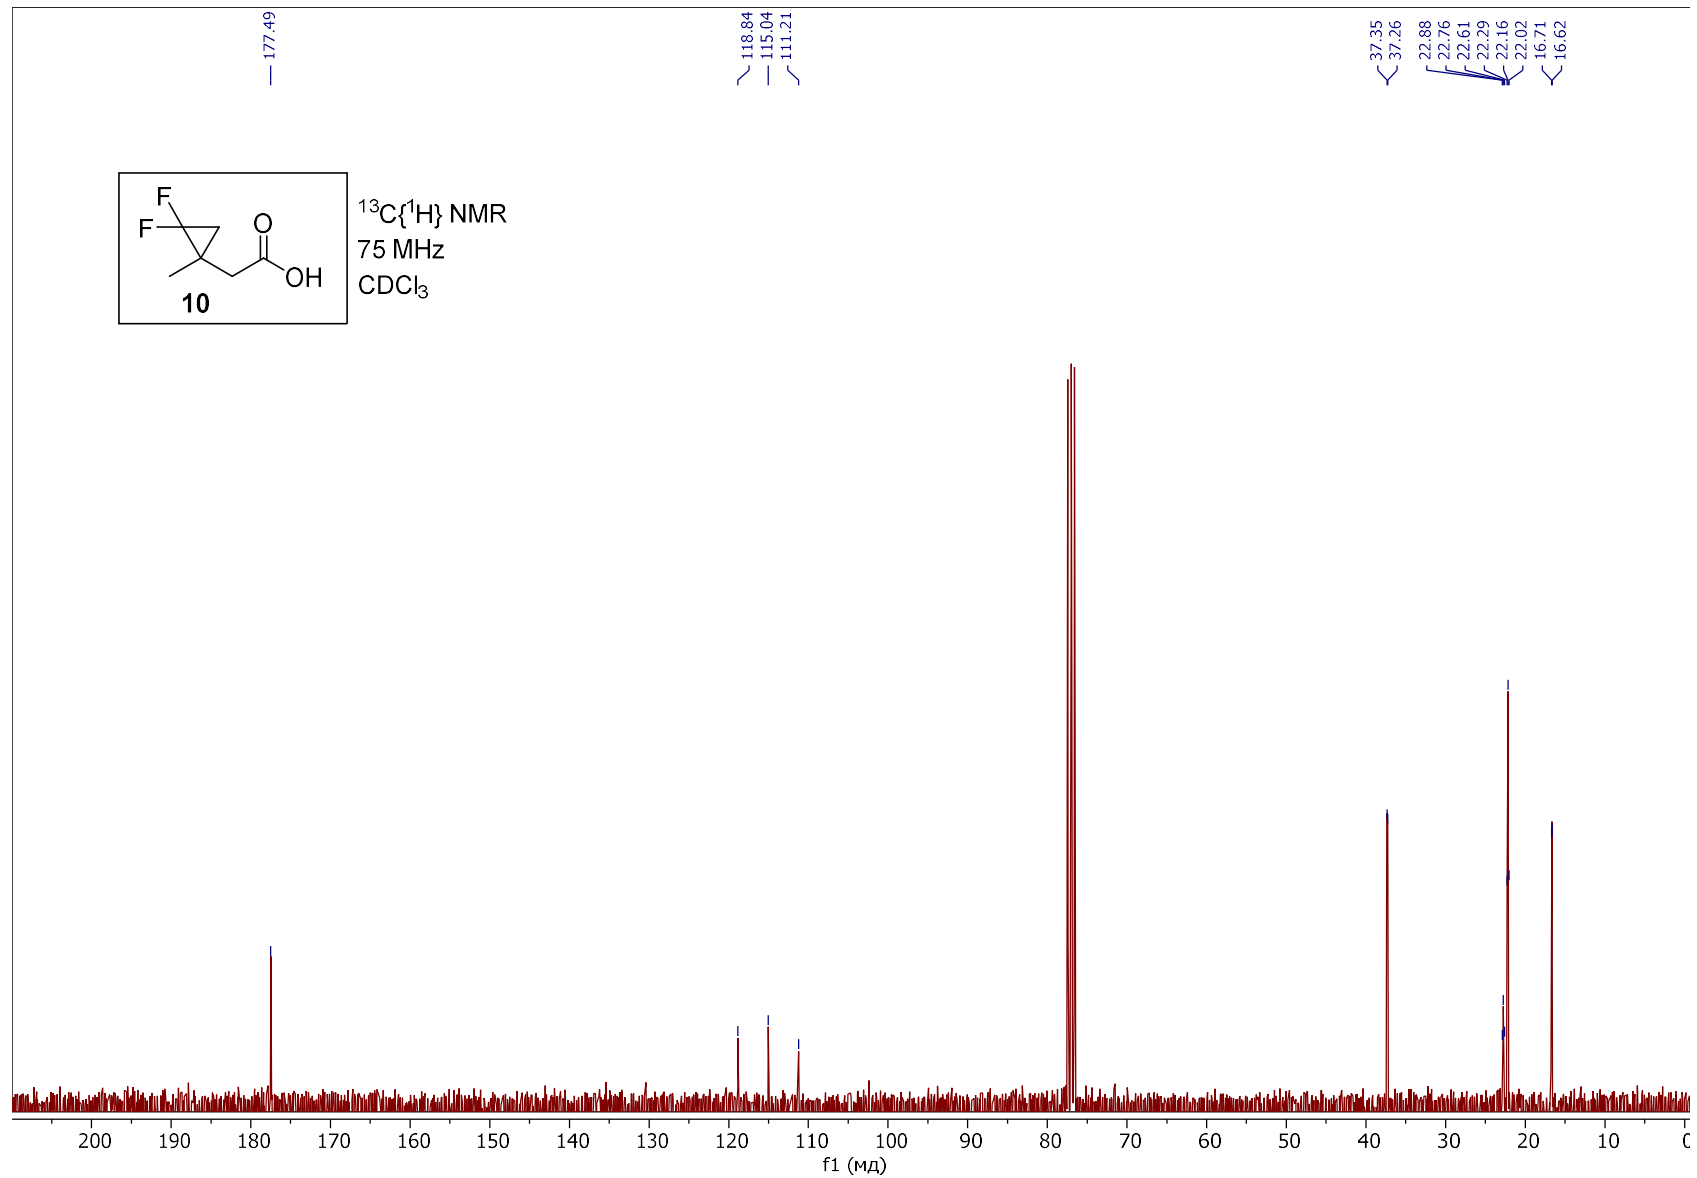

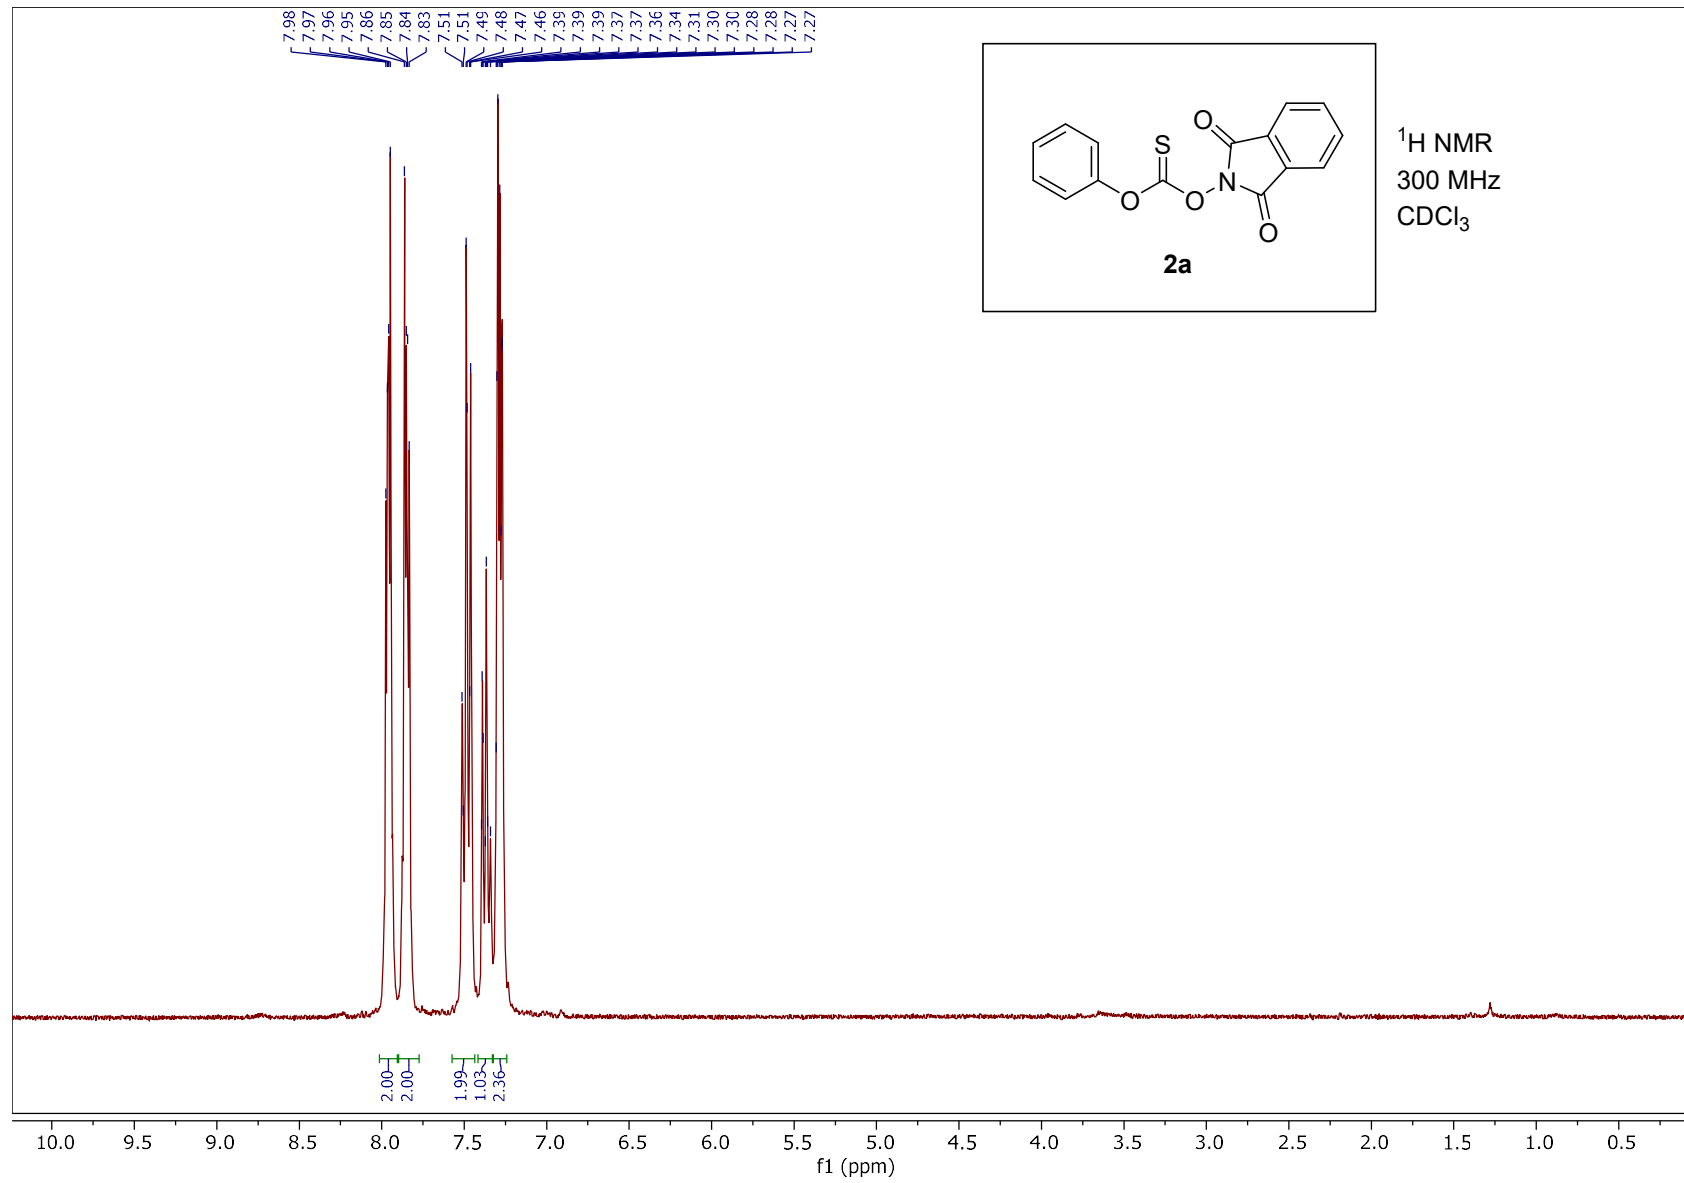

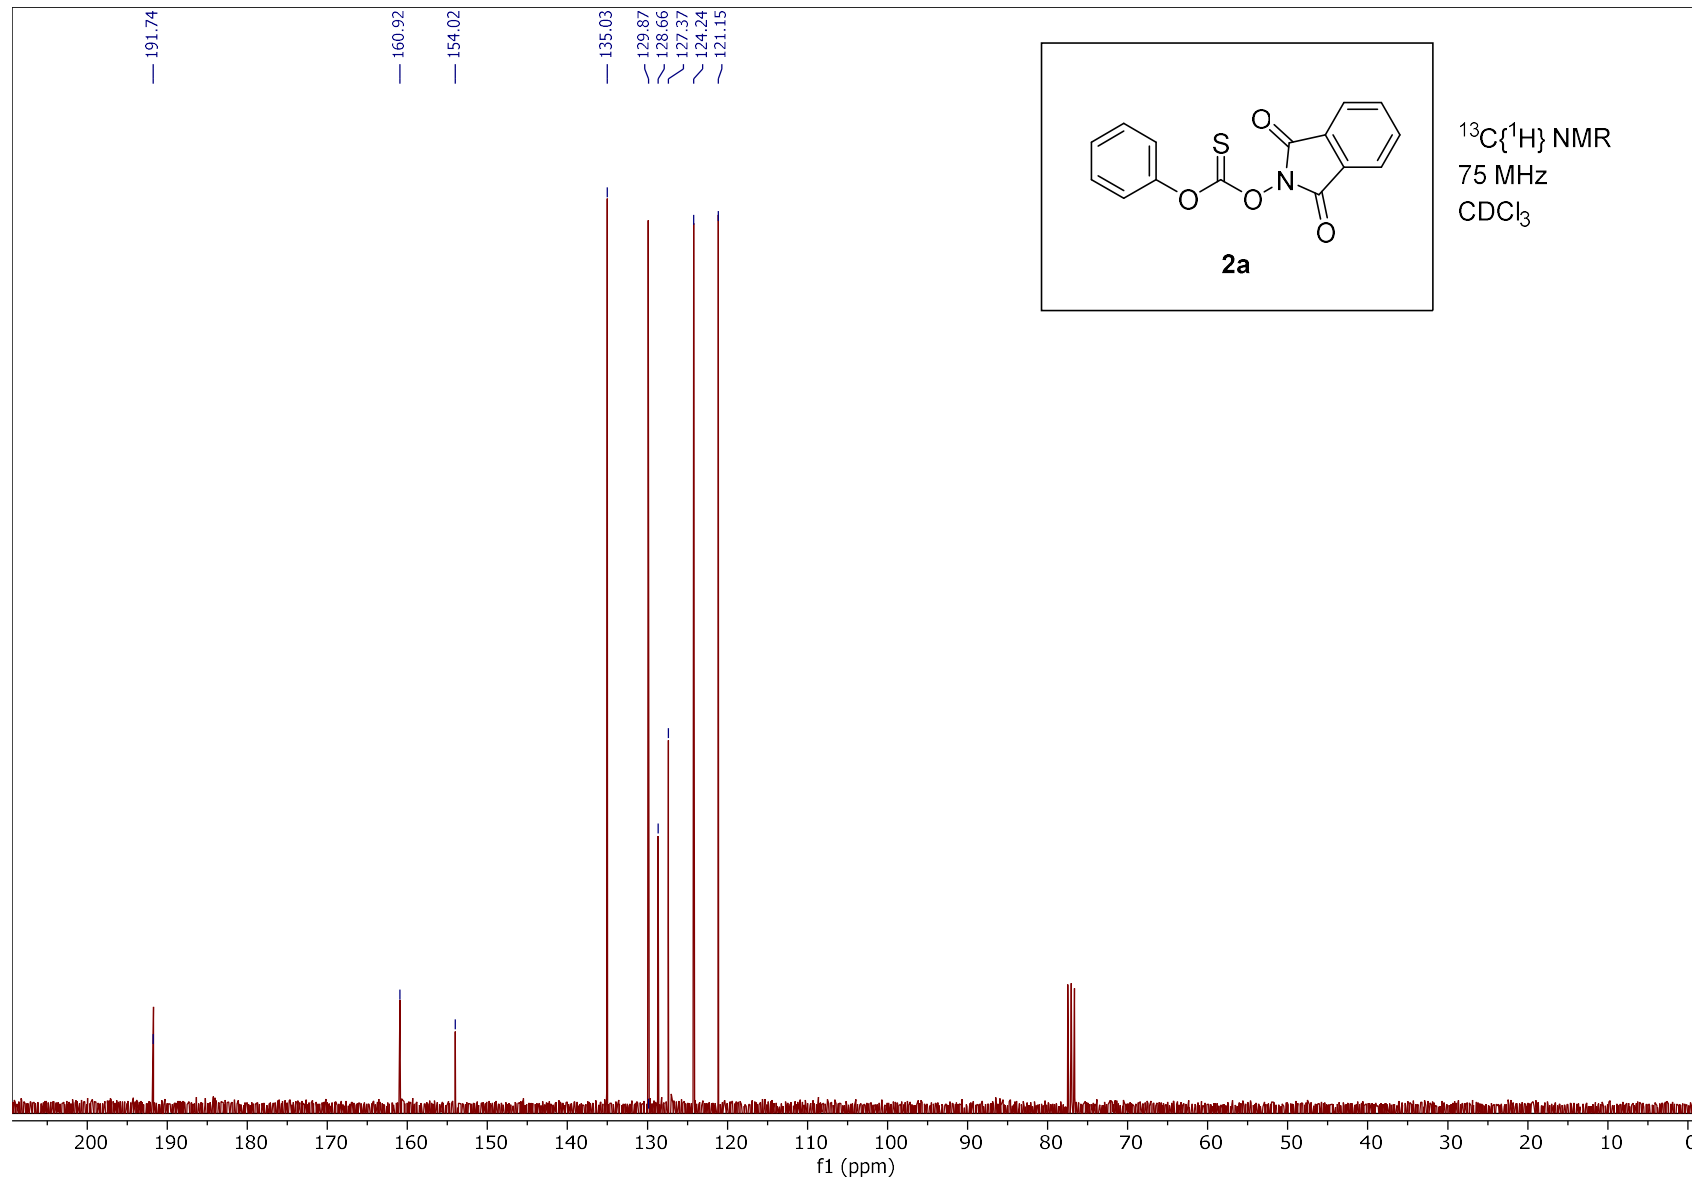

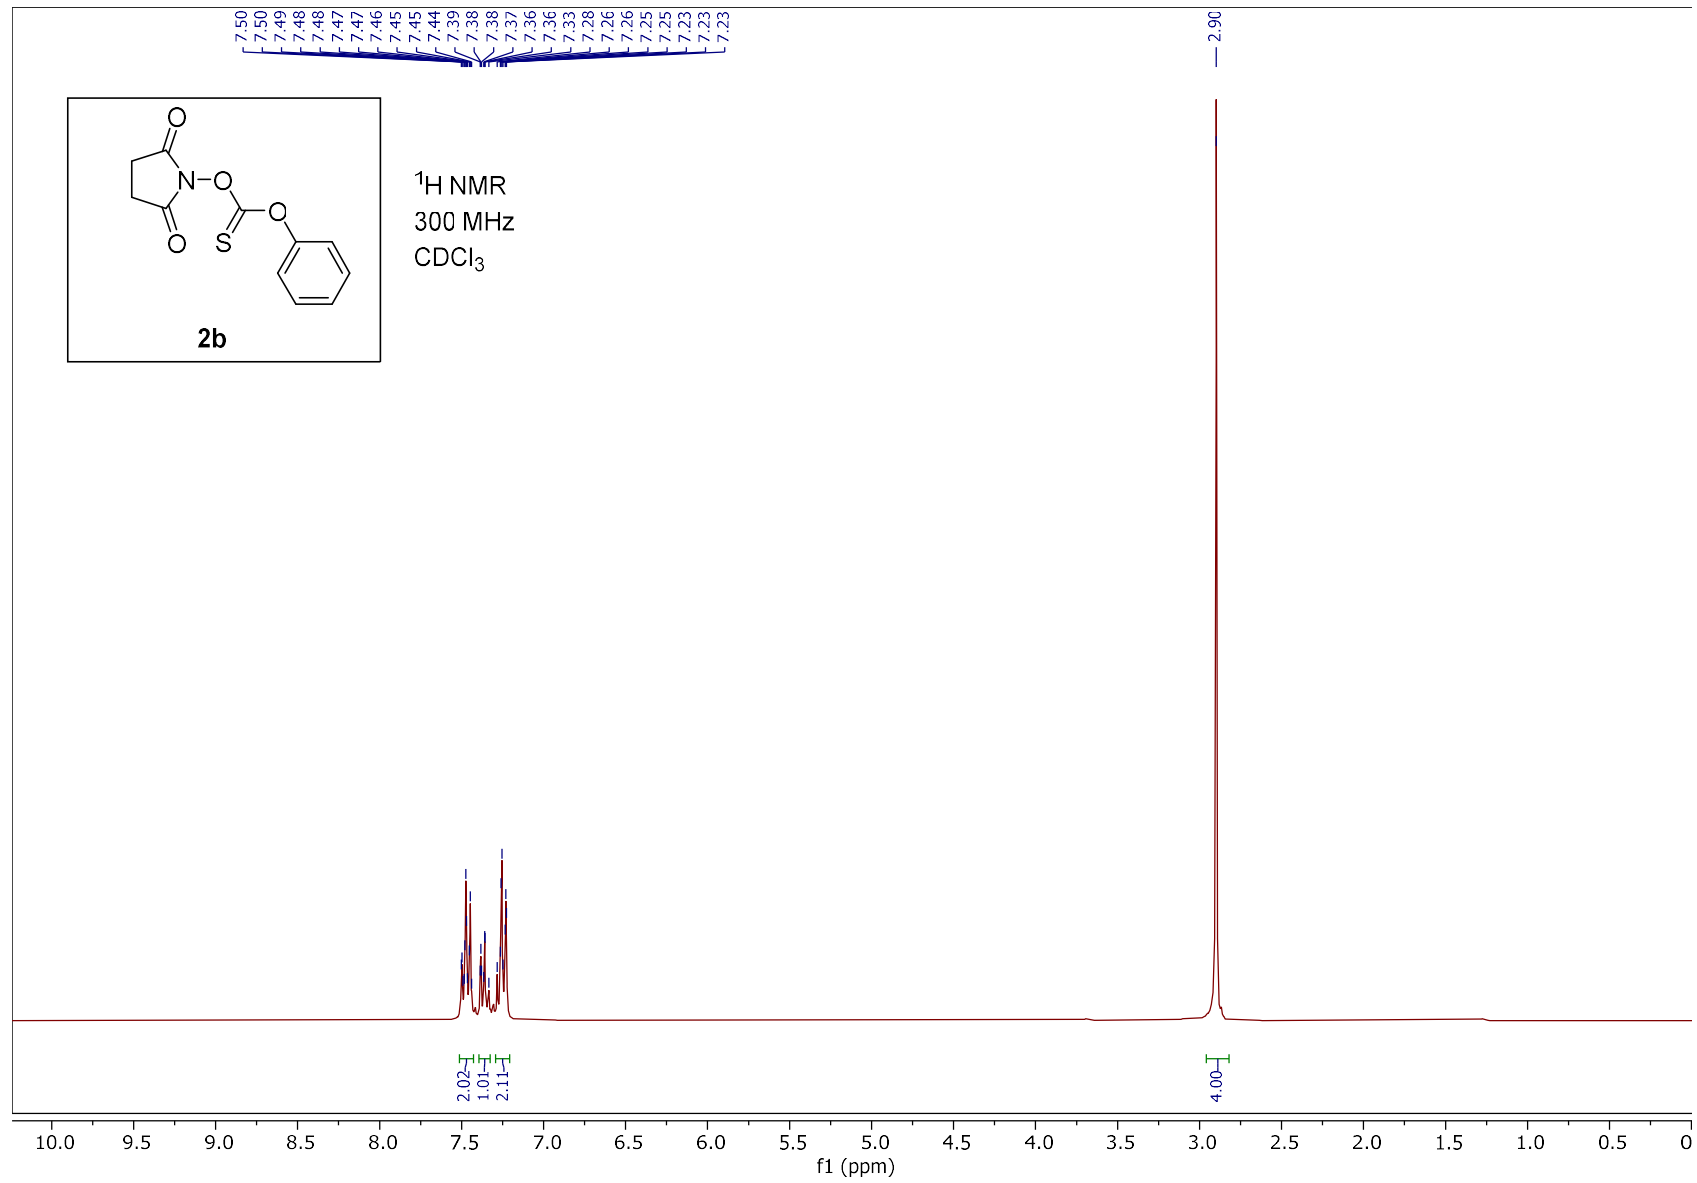



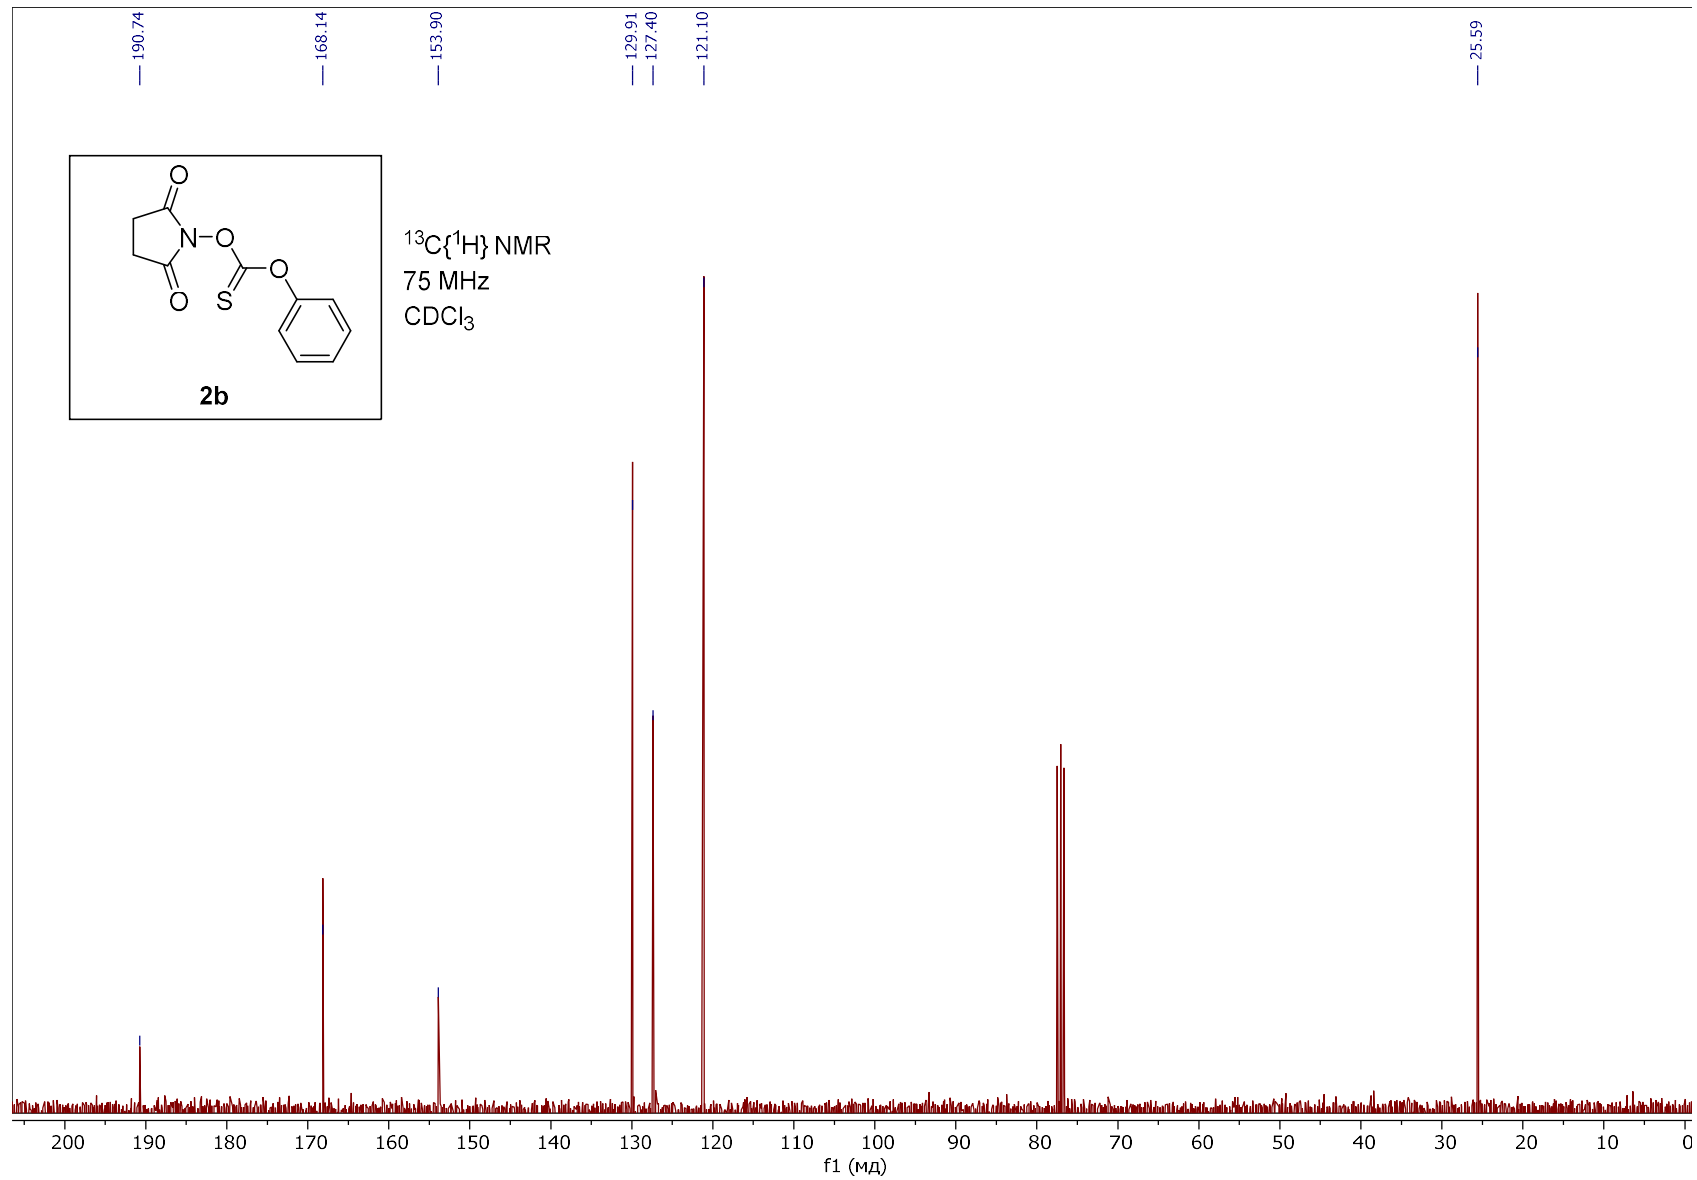

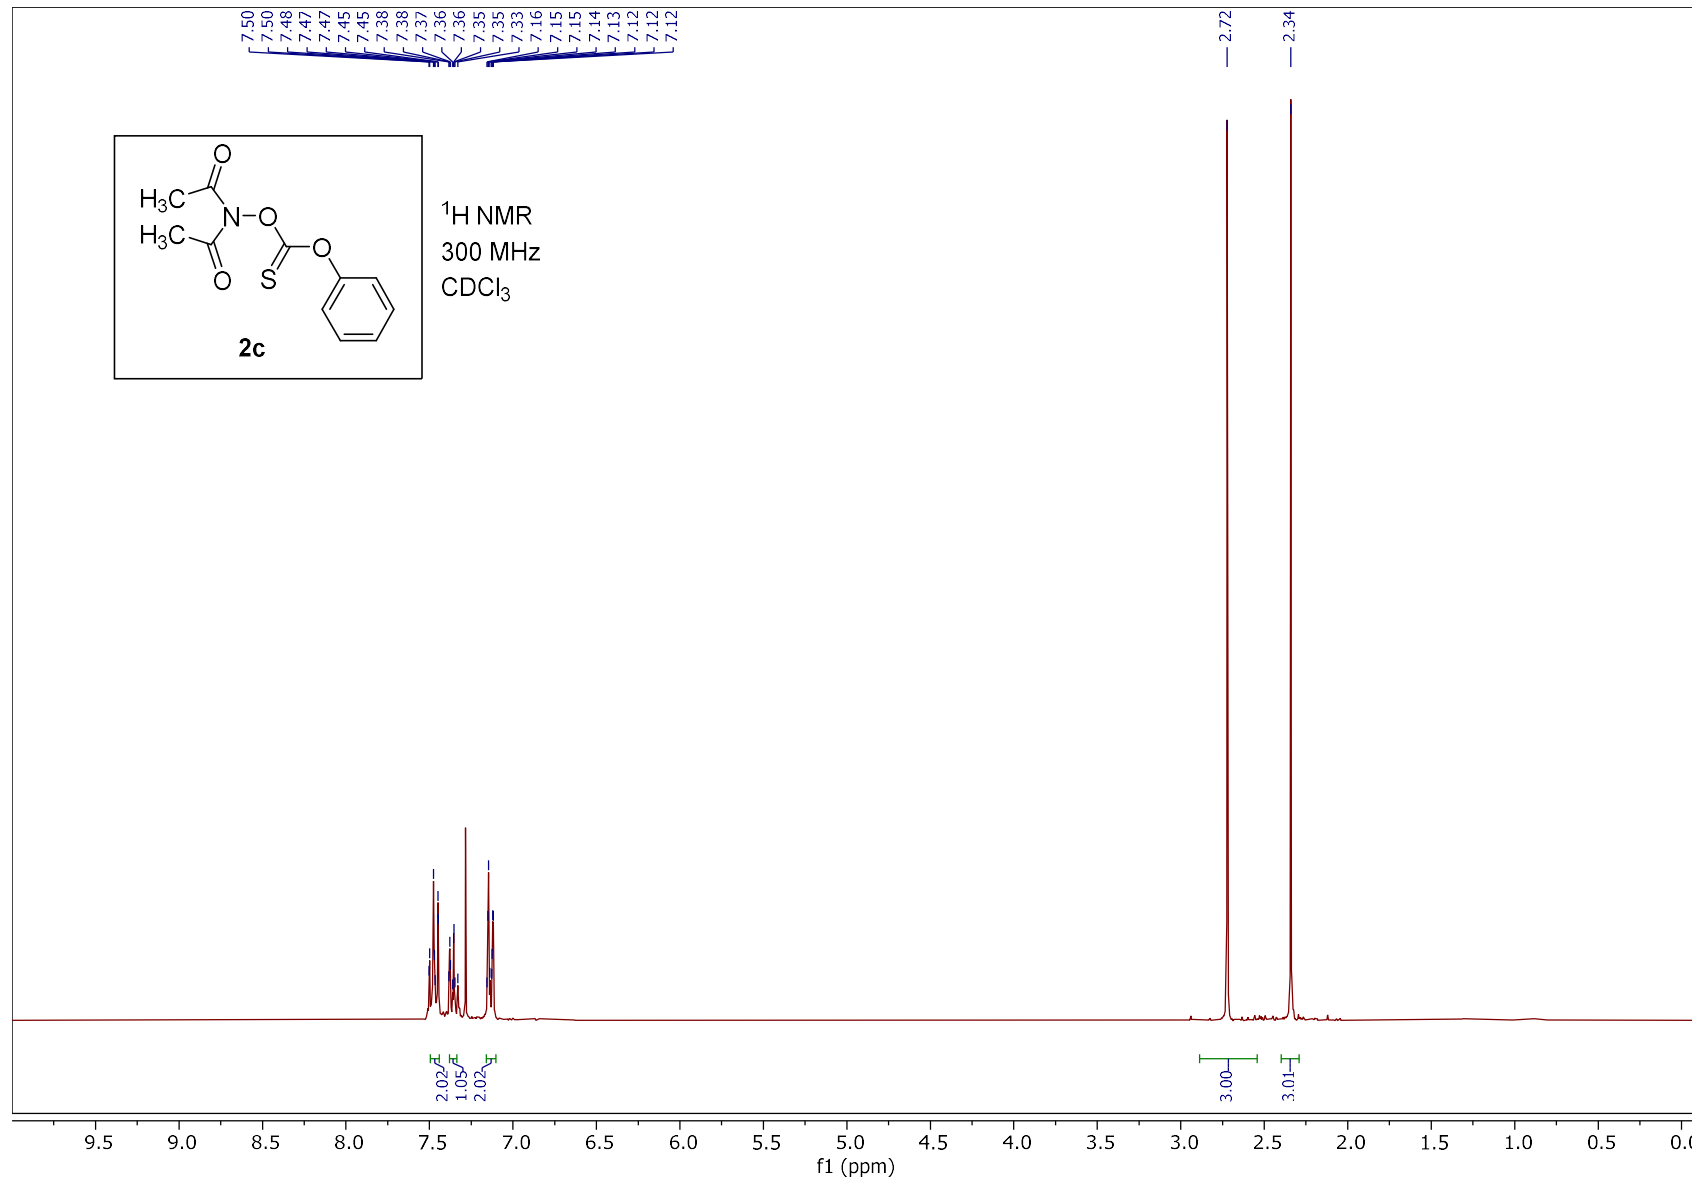

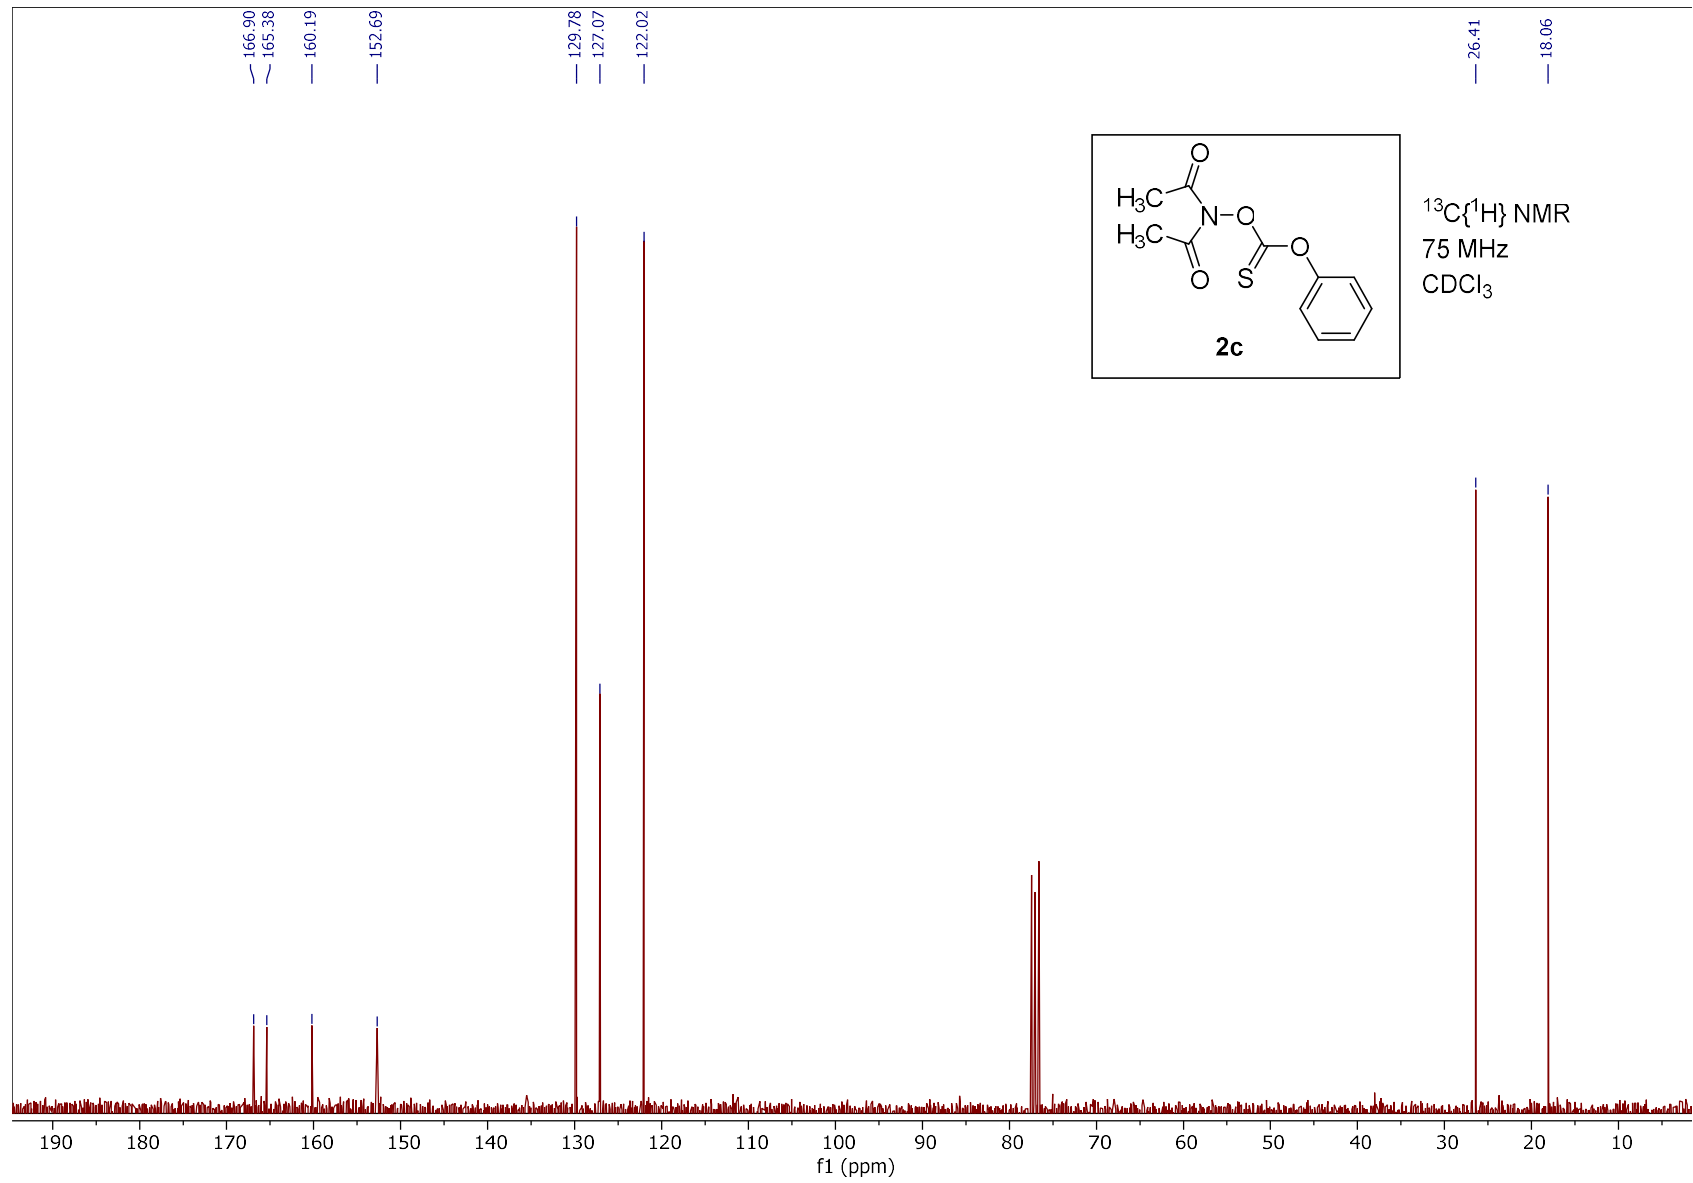

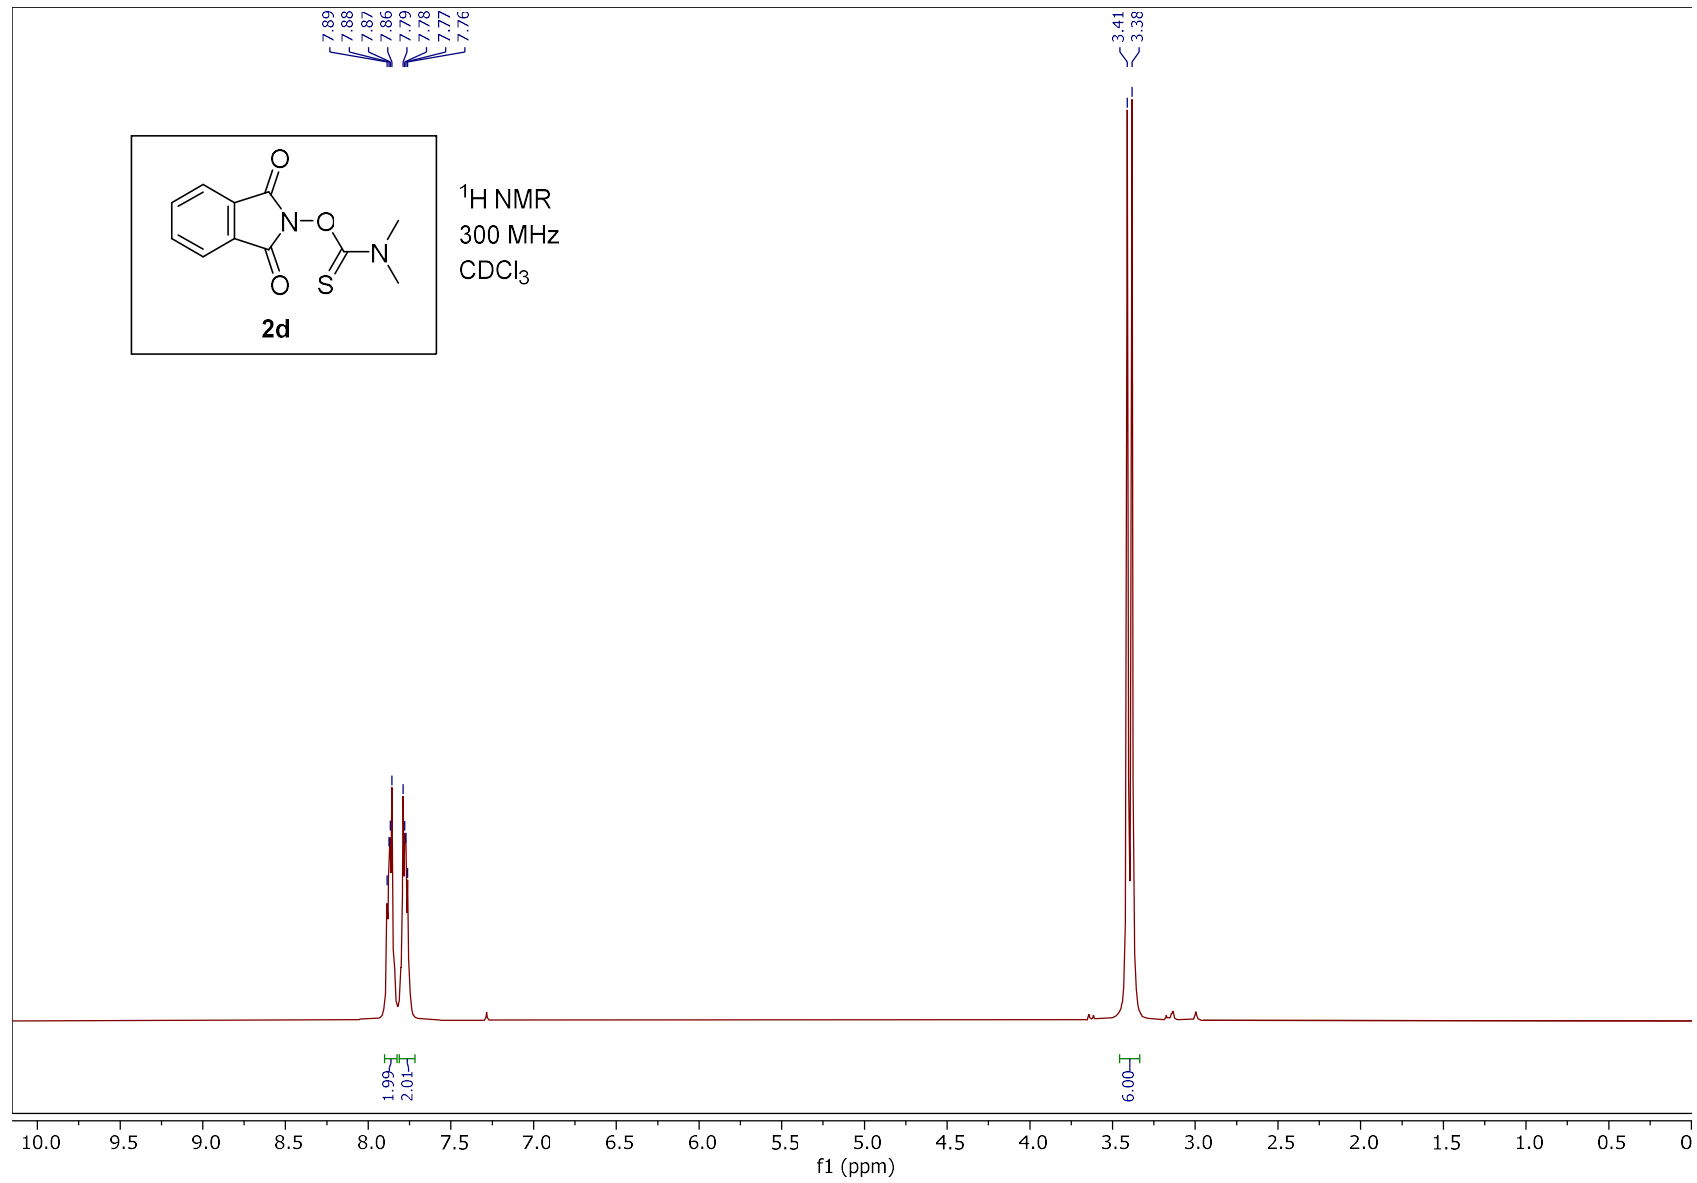

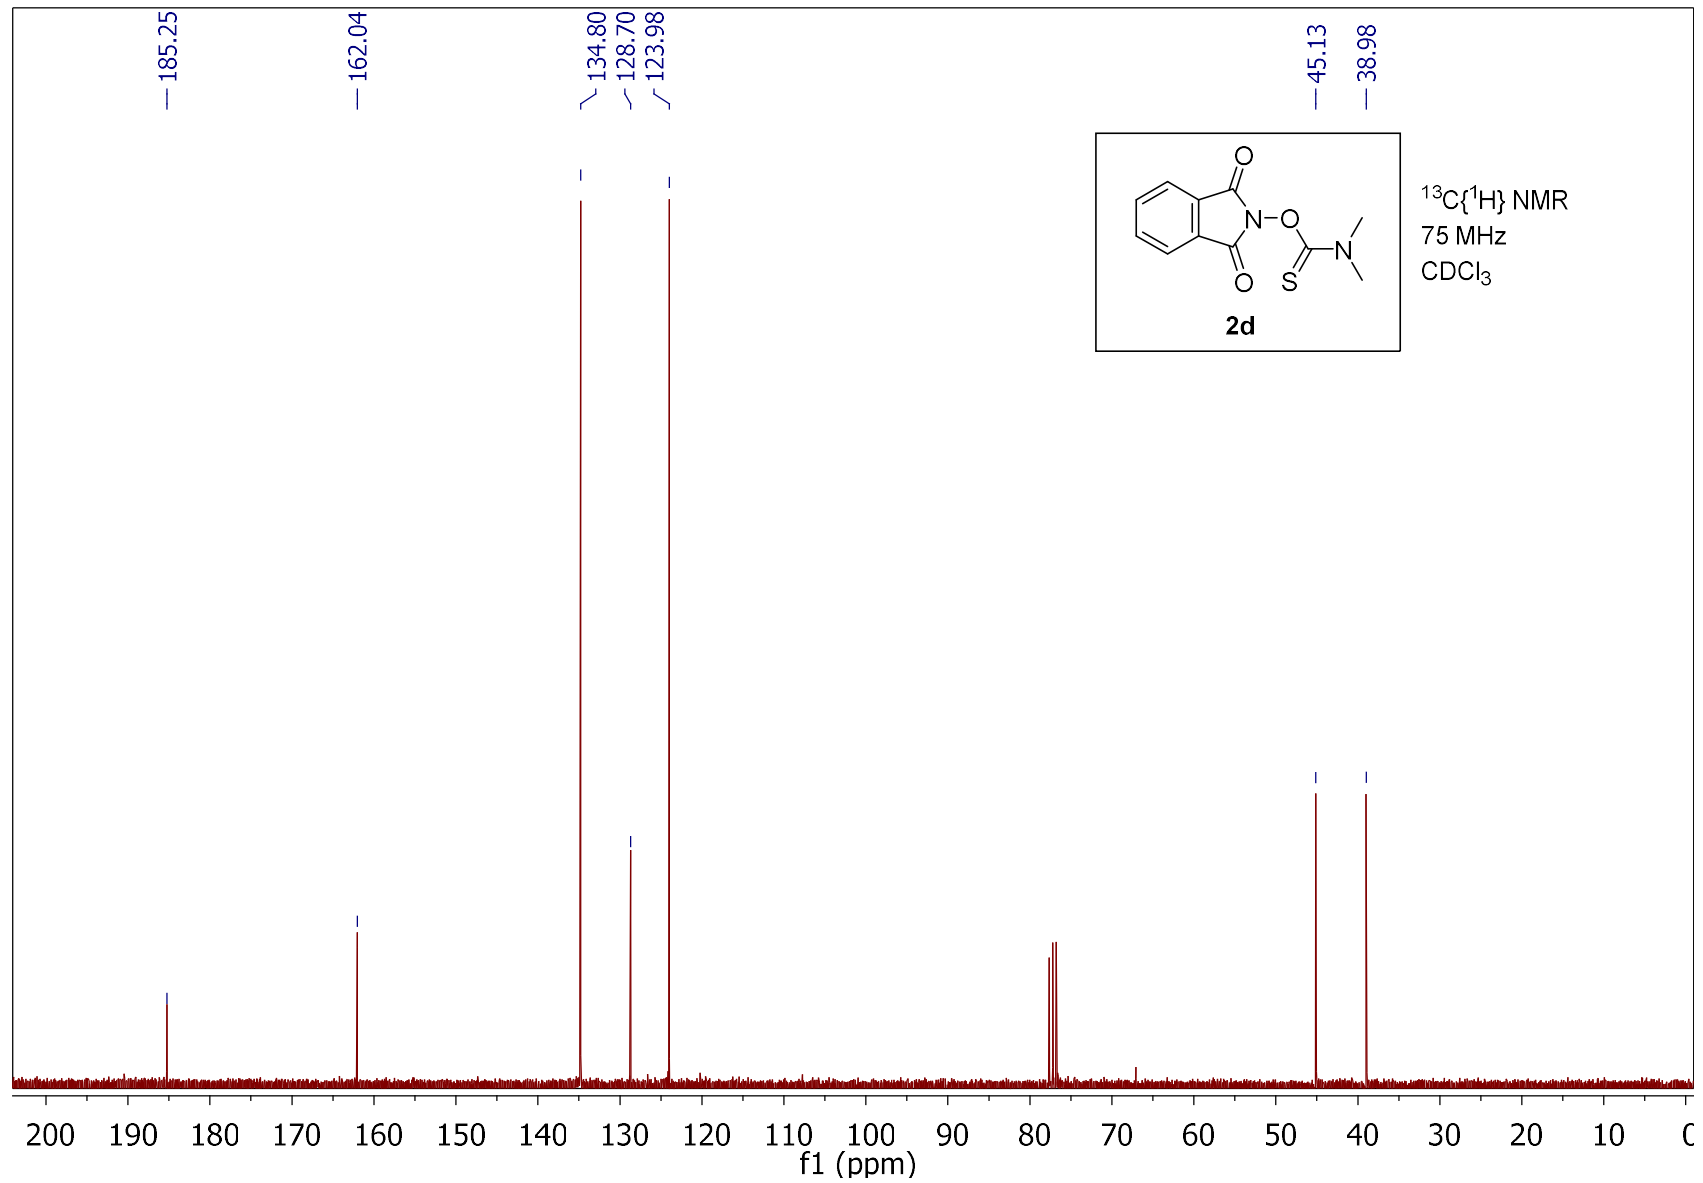

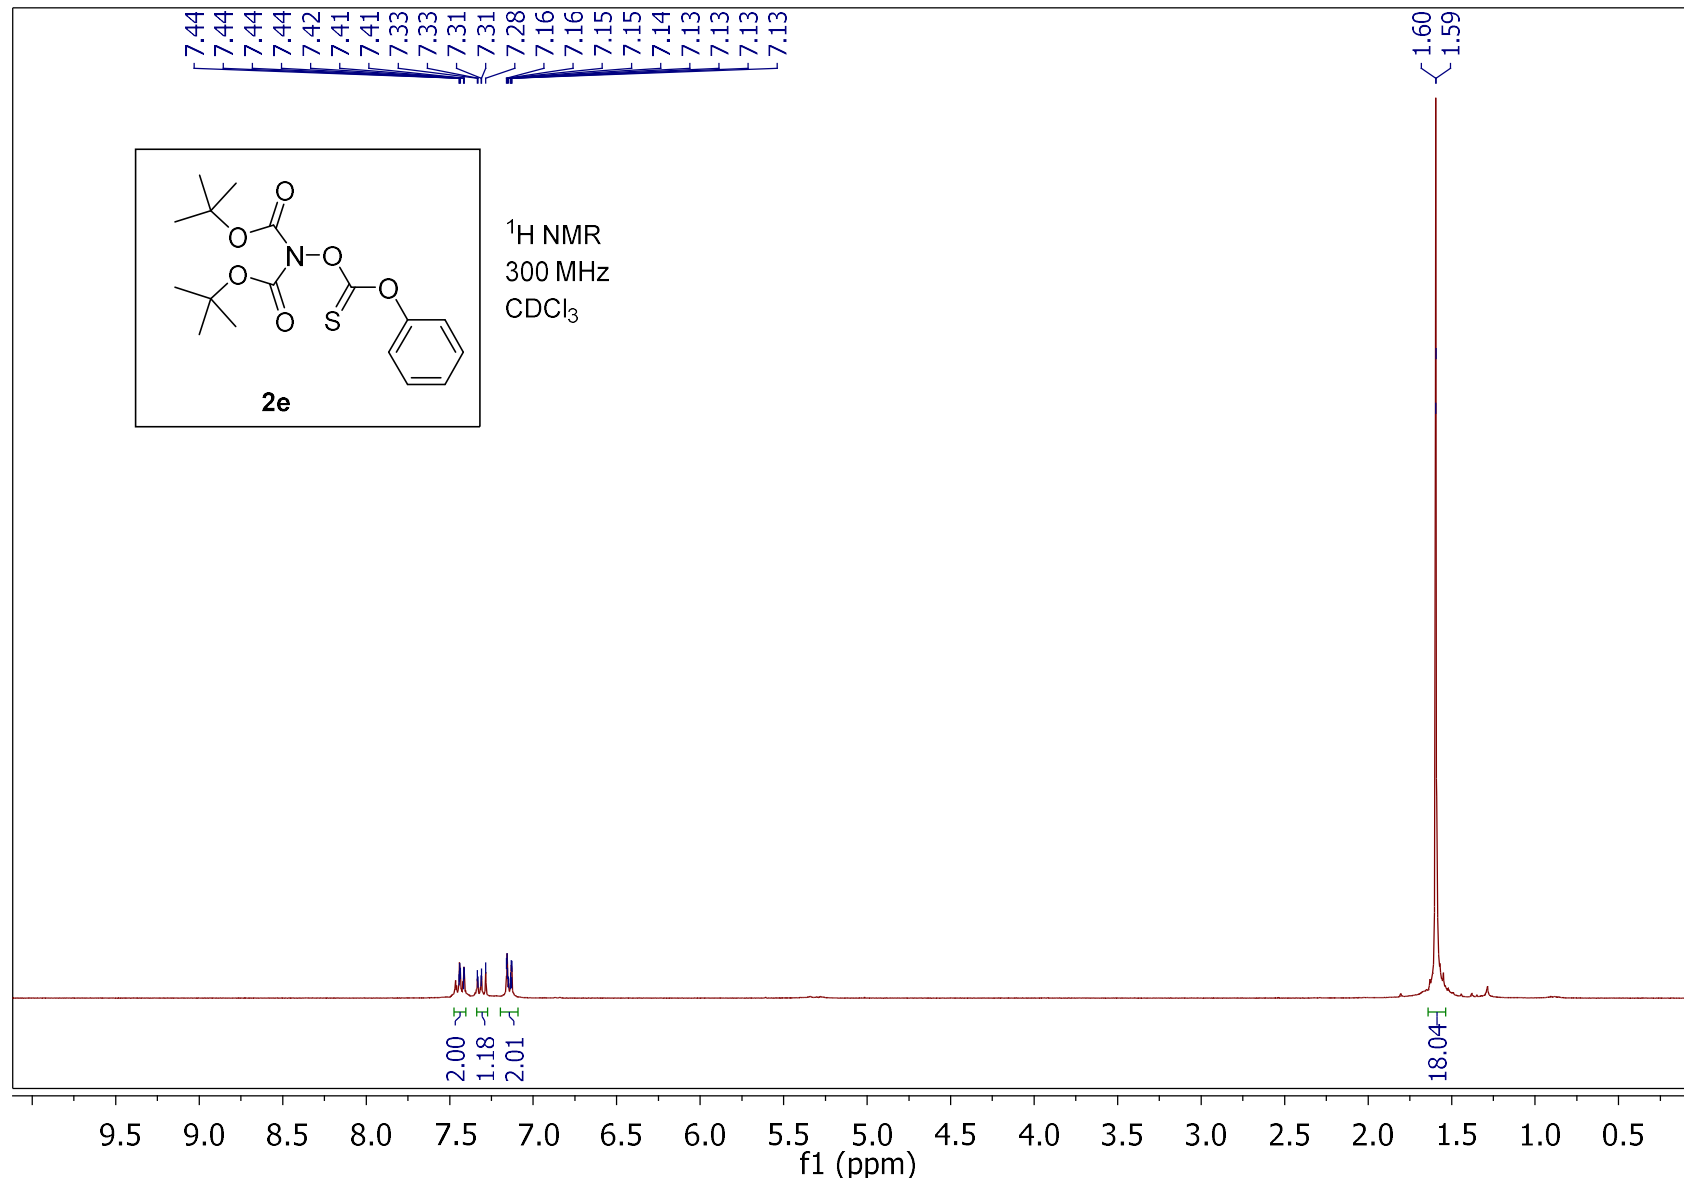

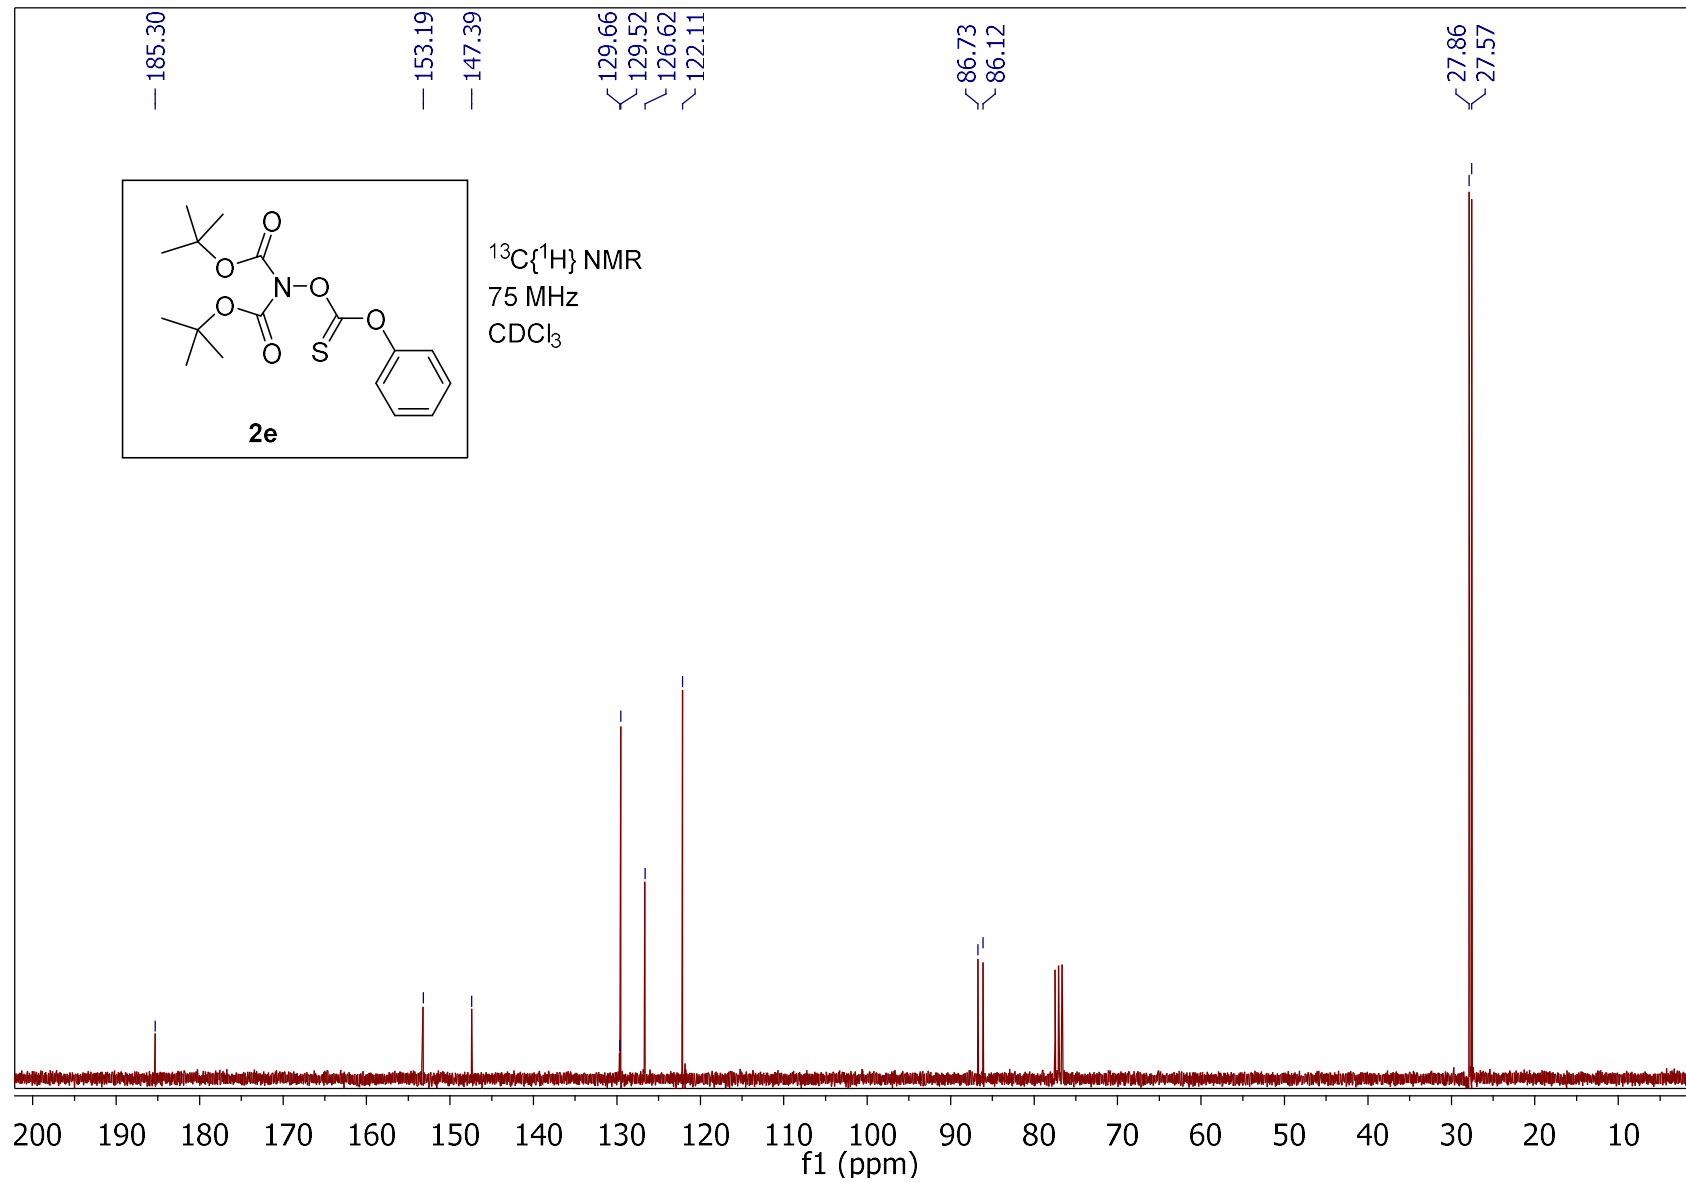

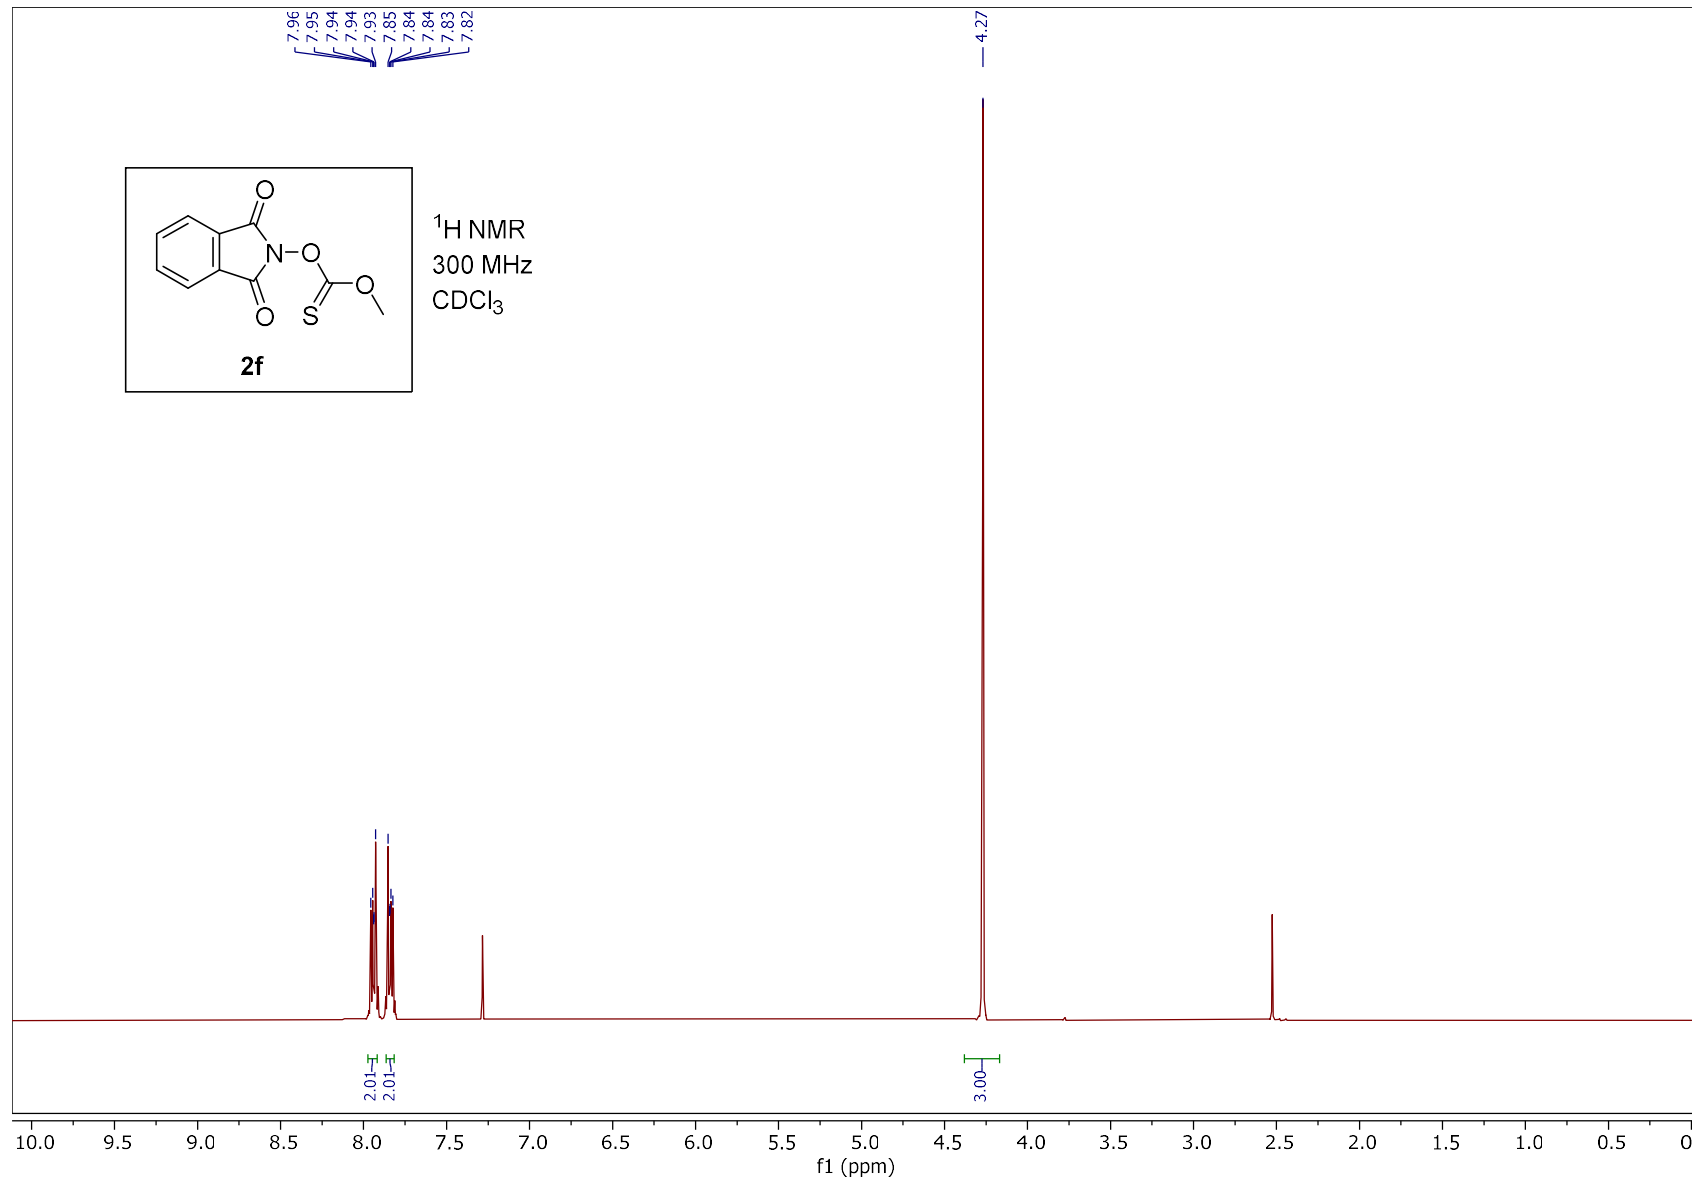



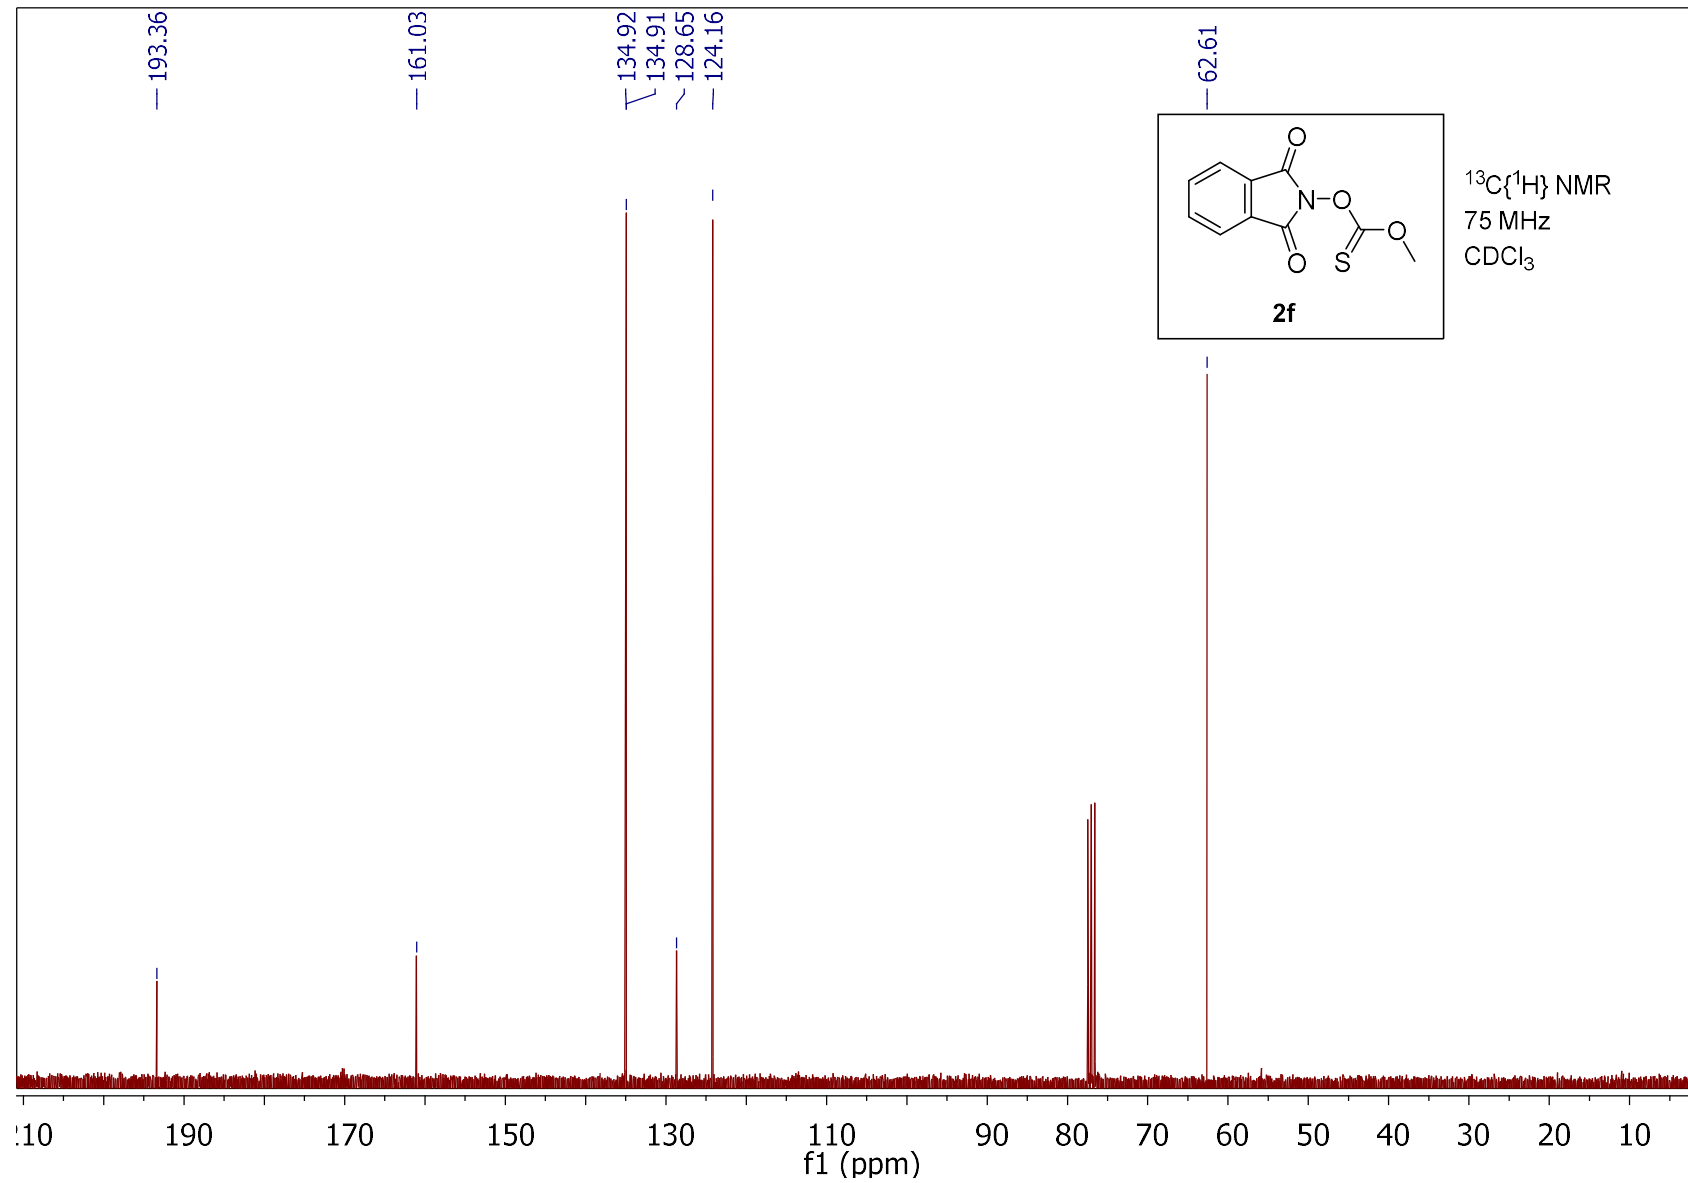

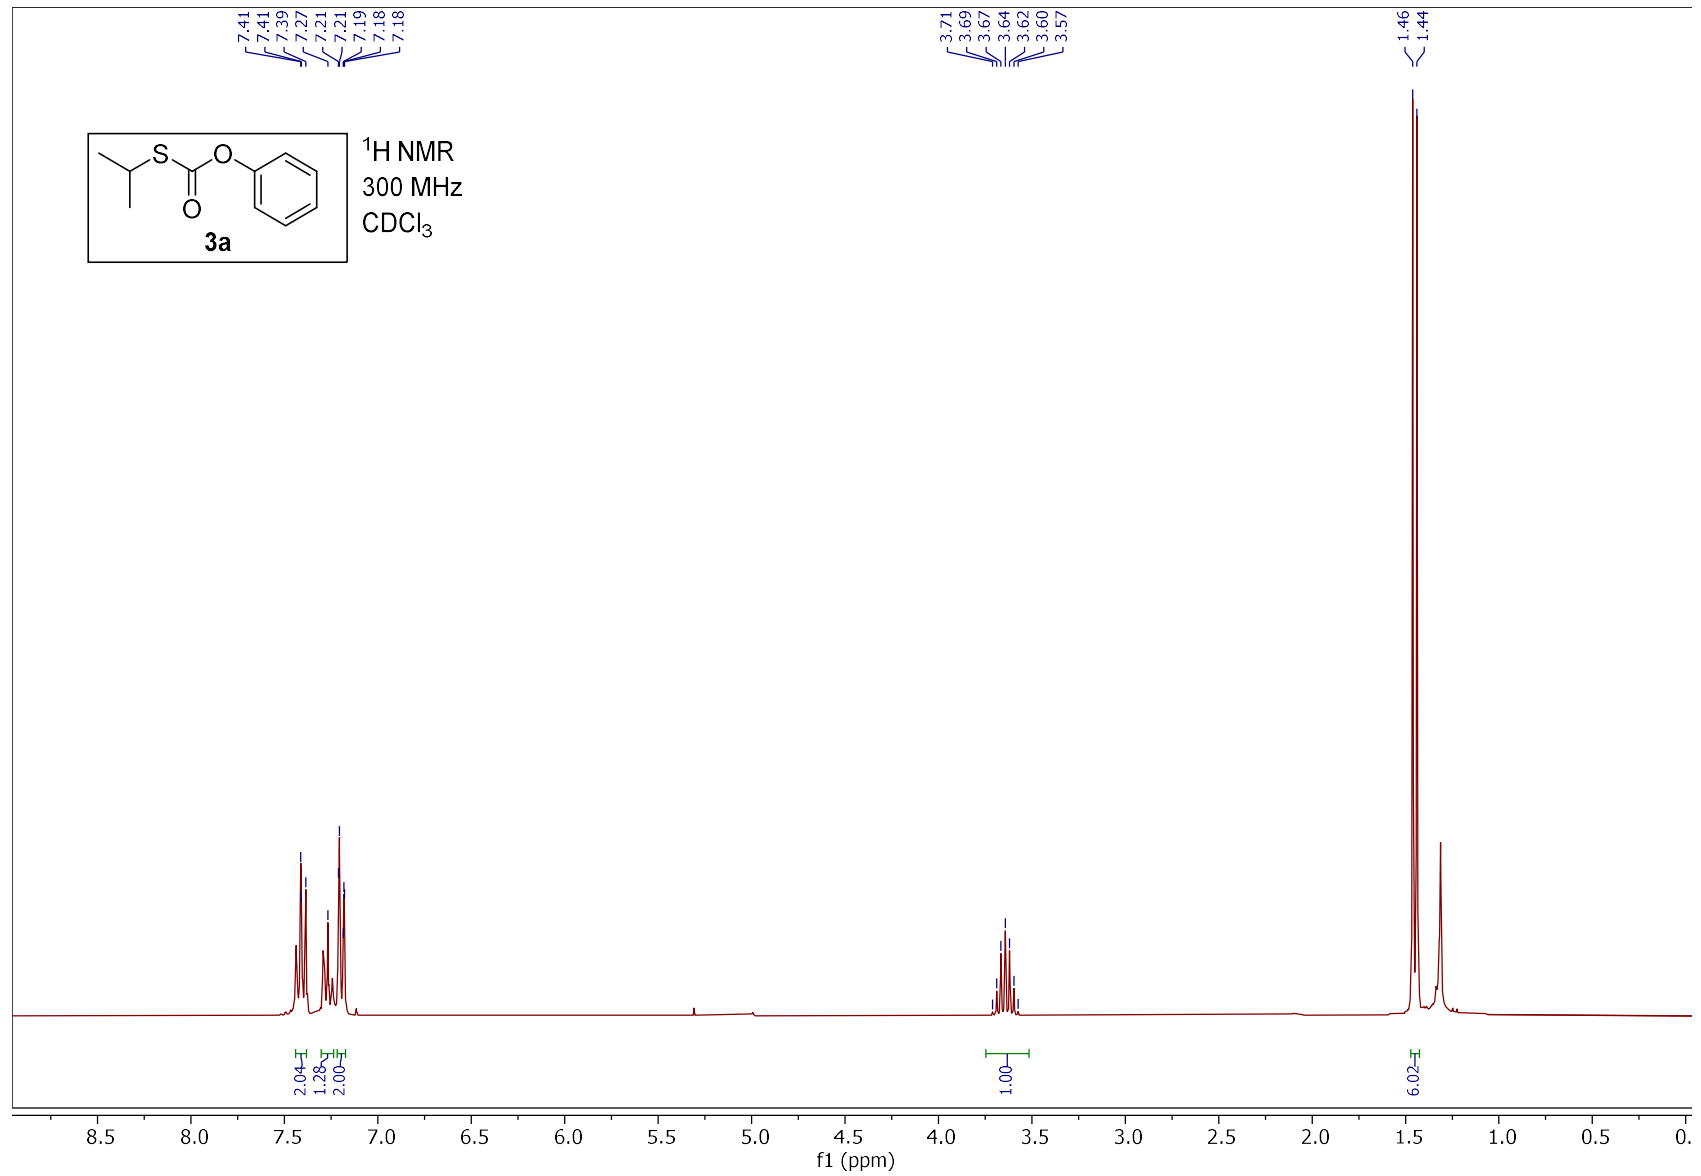

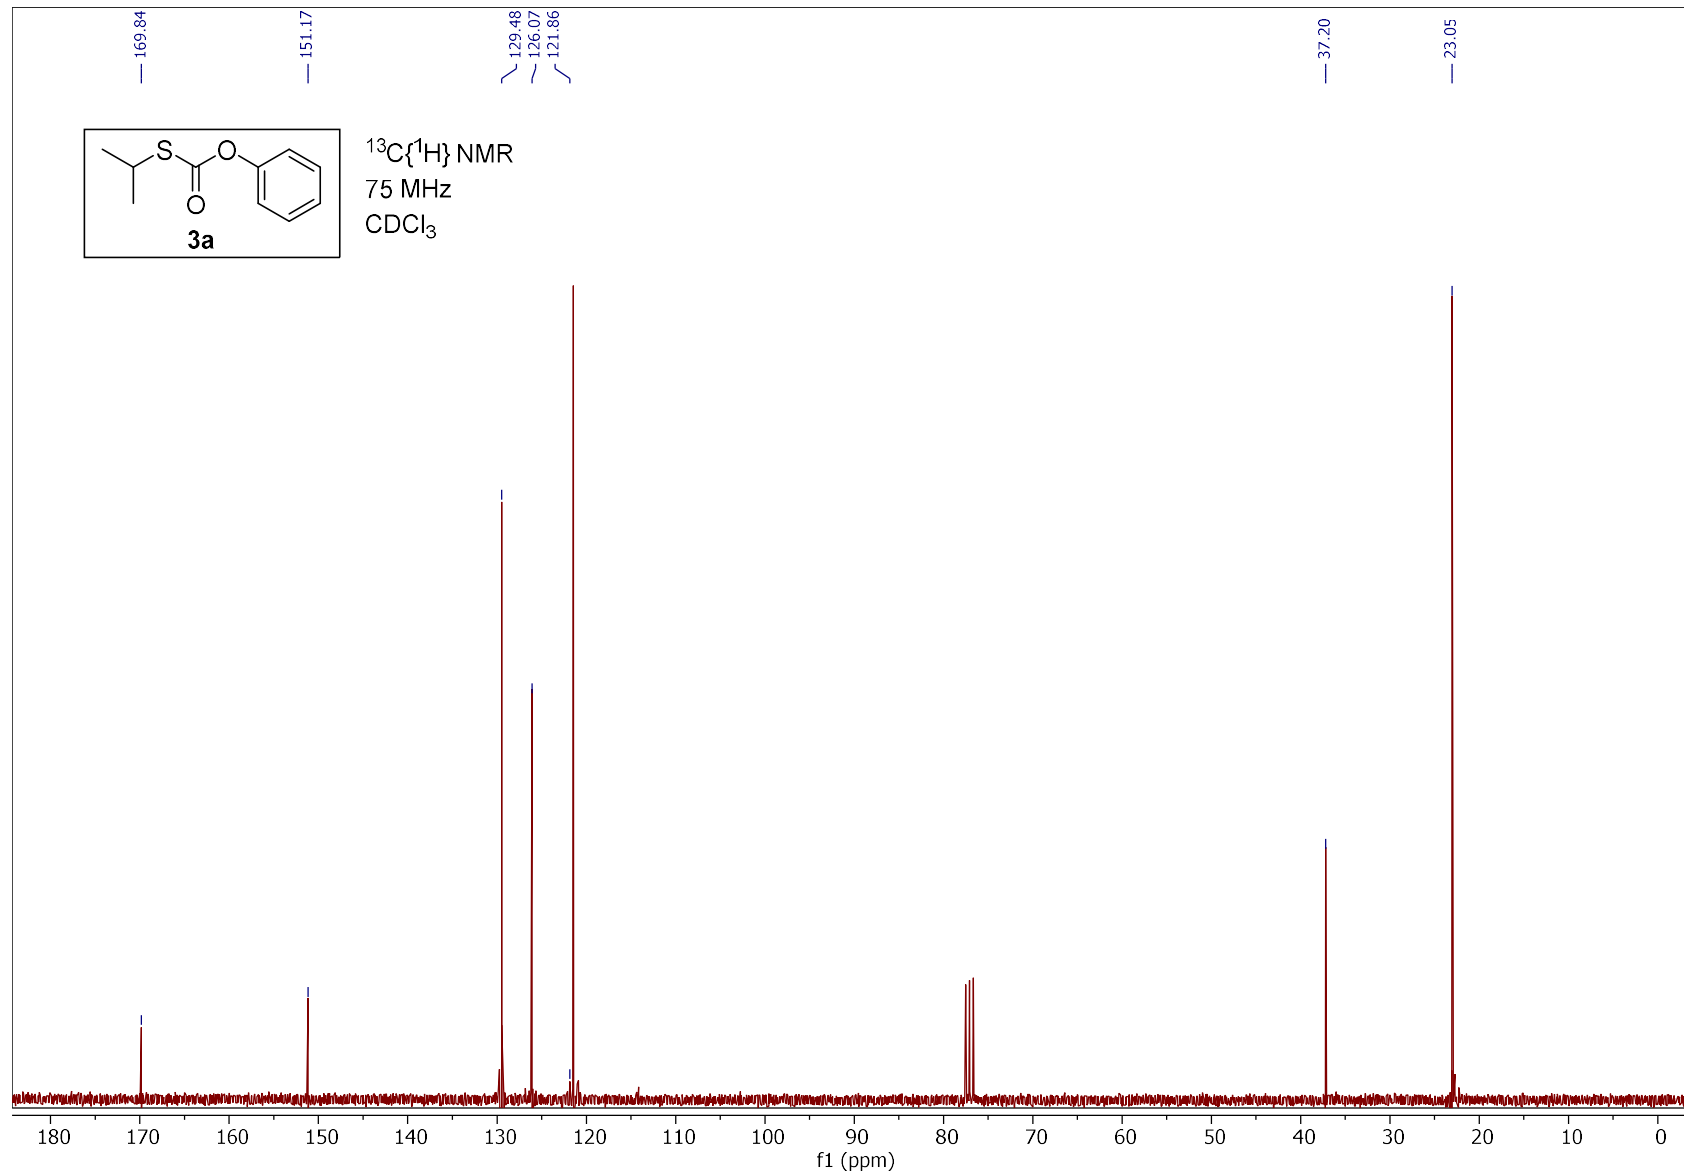

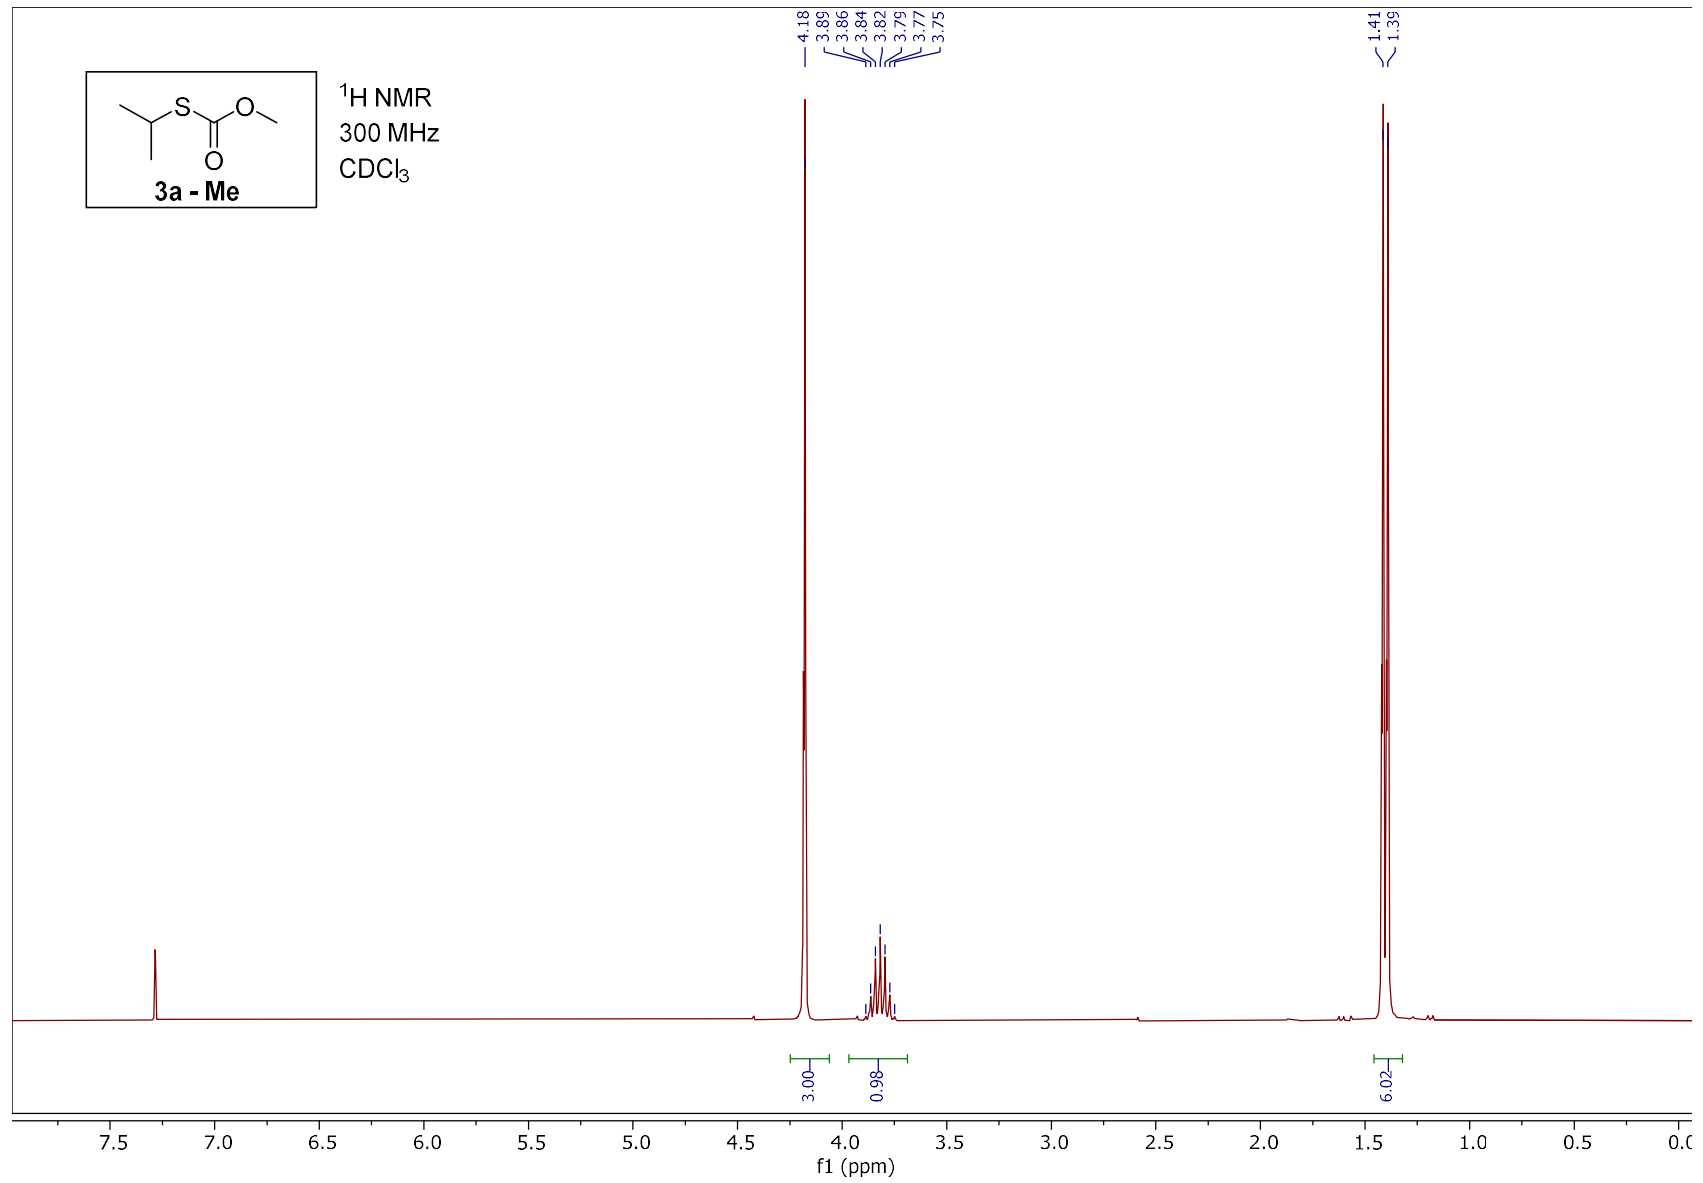

S100

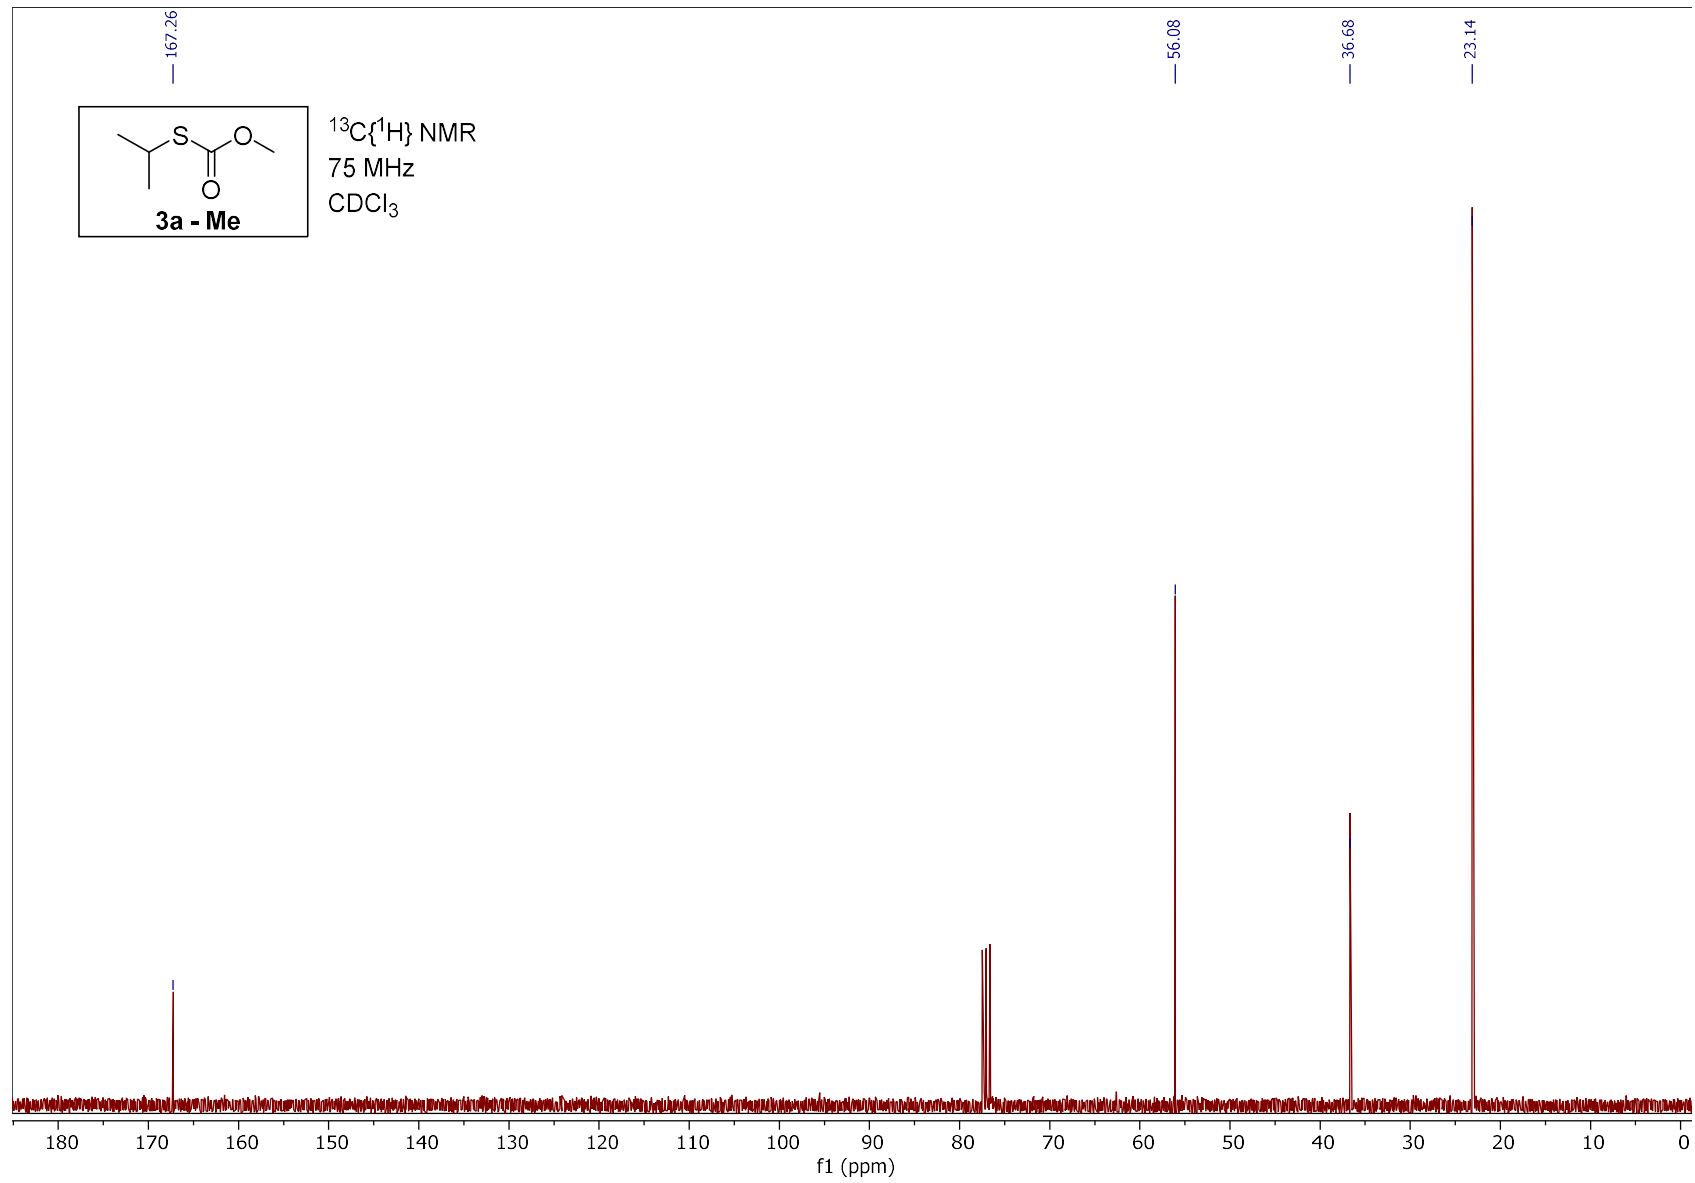

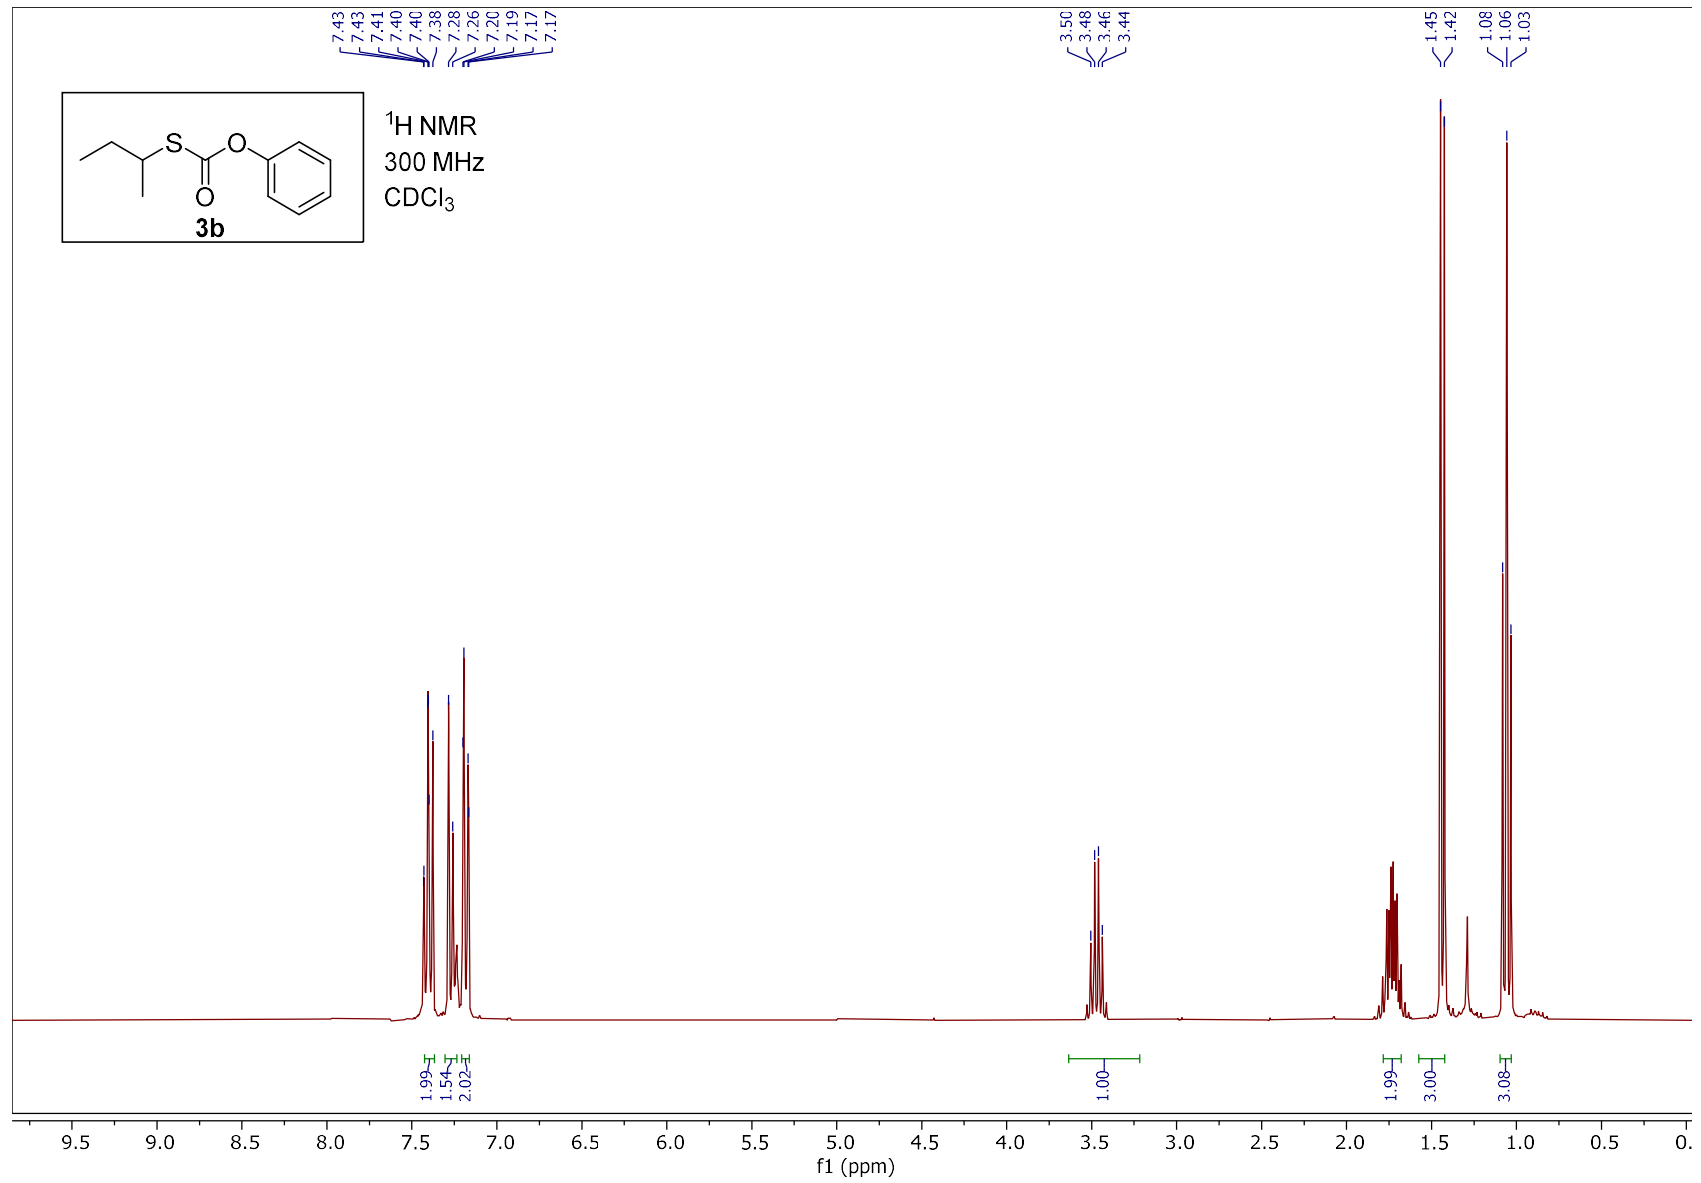

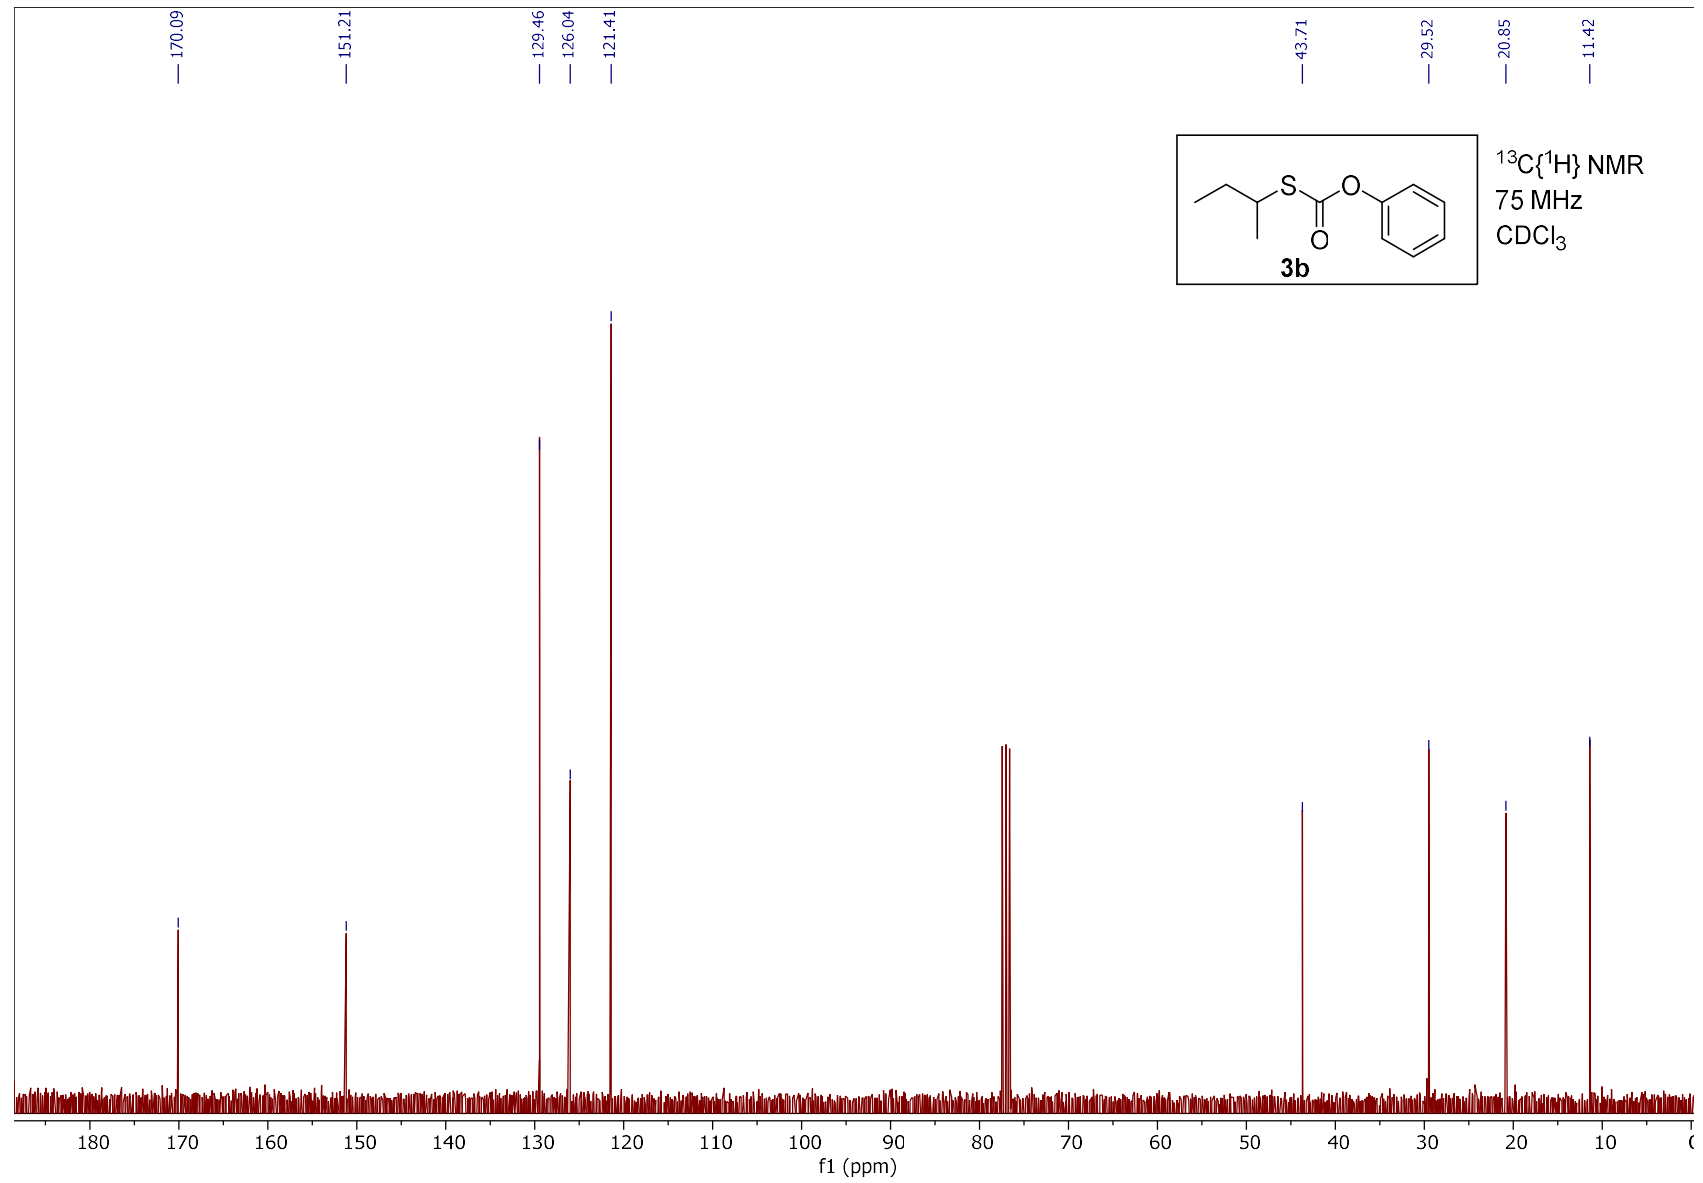

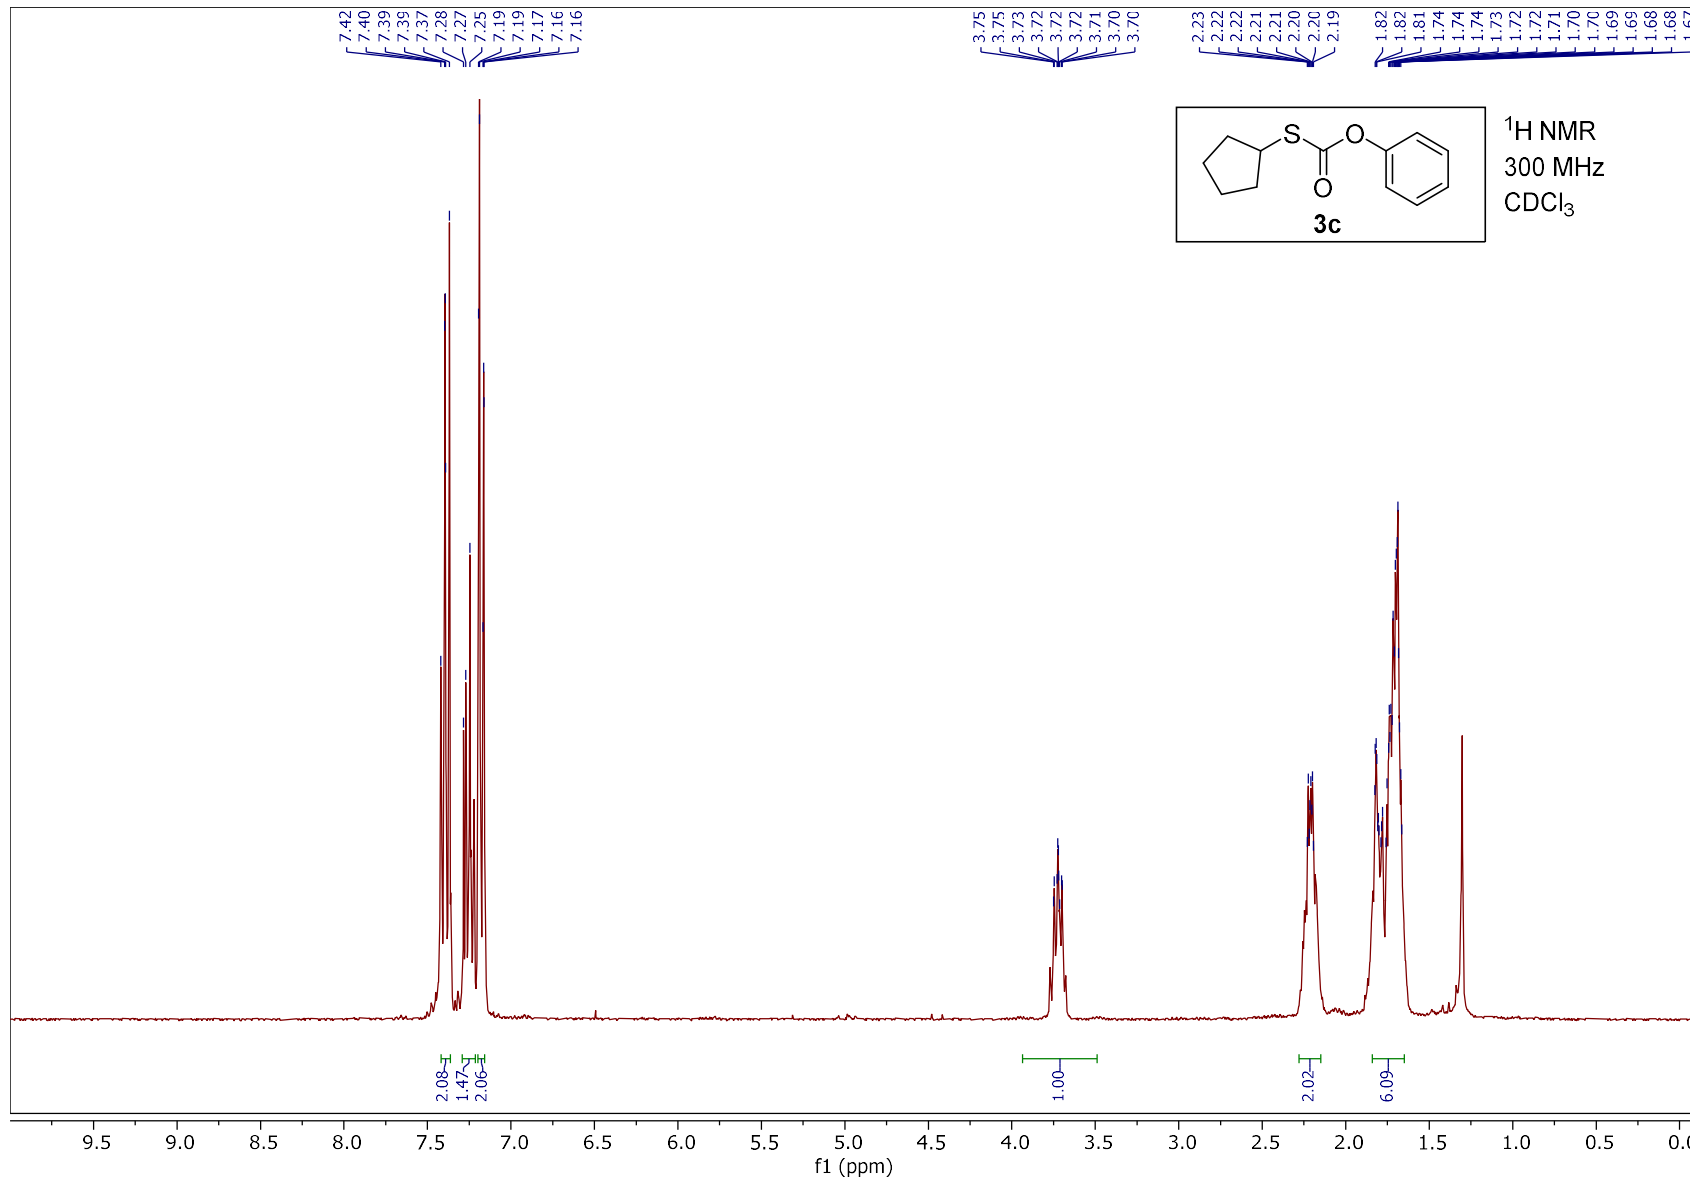



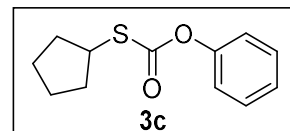

$^{13}\text{C}\{^1\text{H}\}$  NMR  
75 MHz  
 $\text{CDCl}_3$

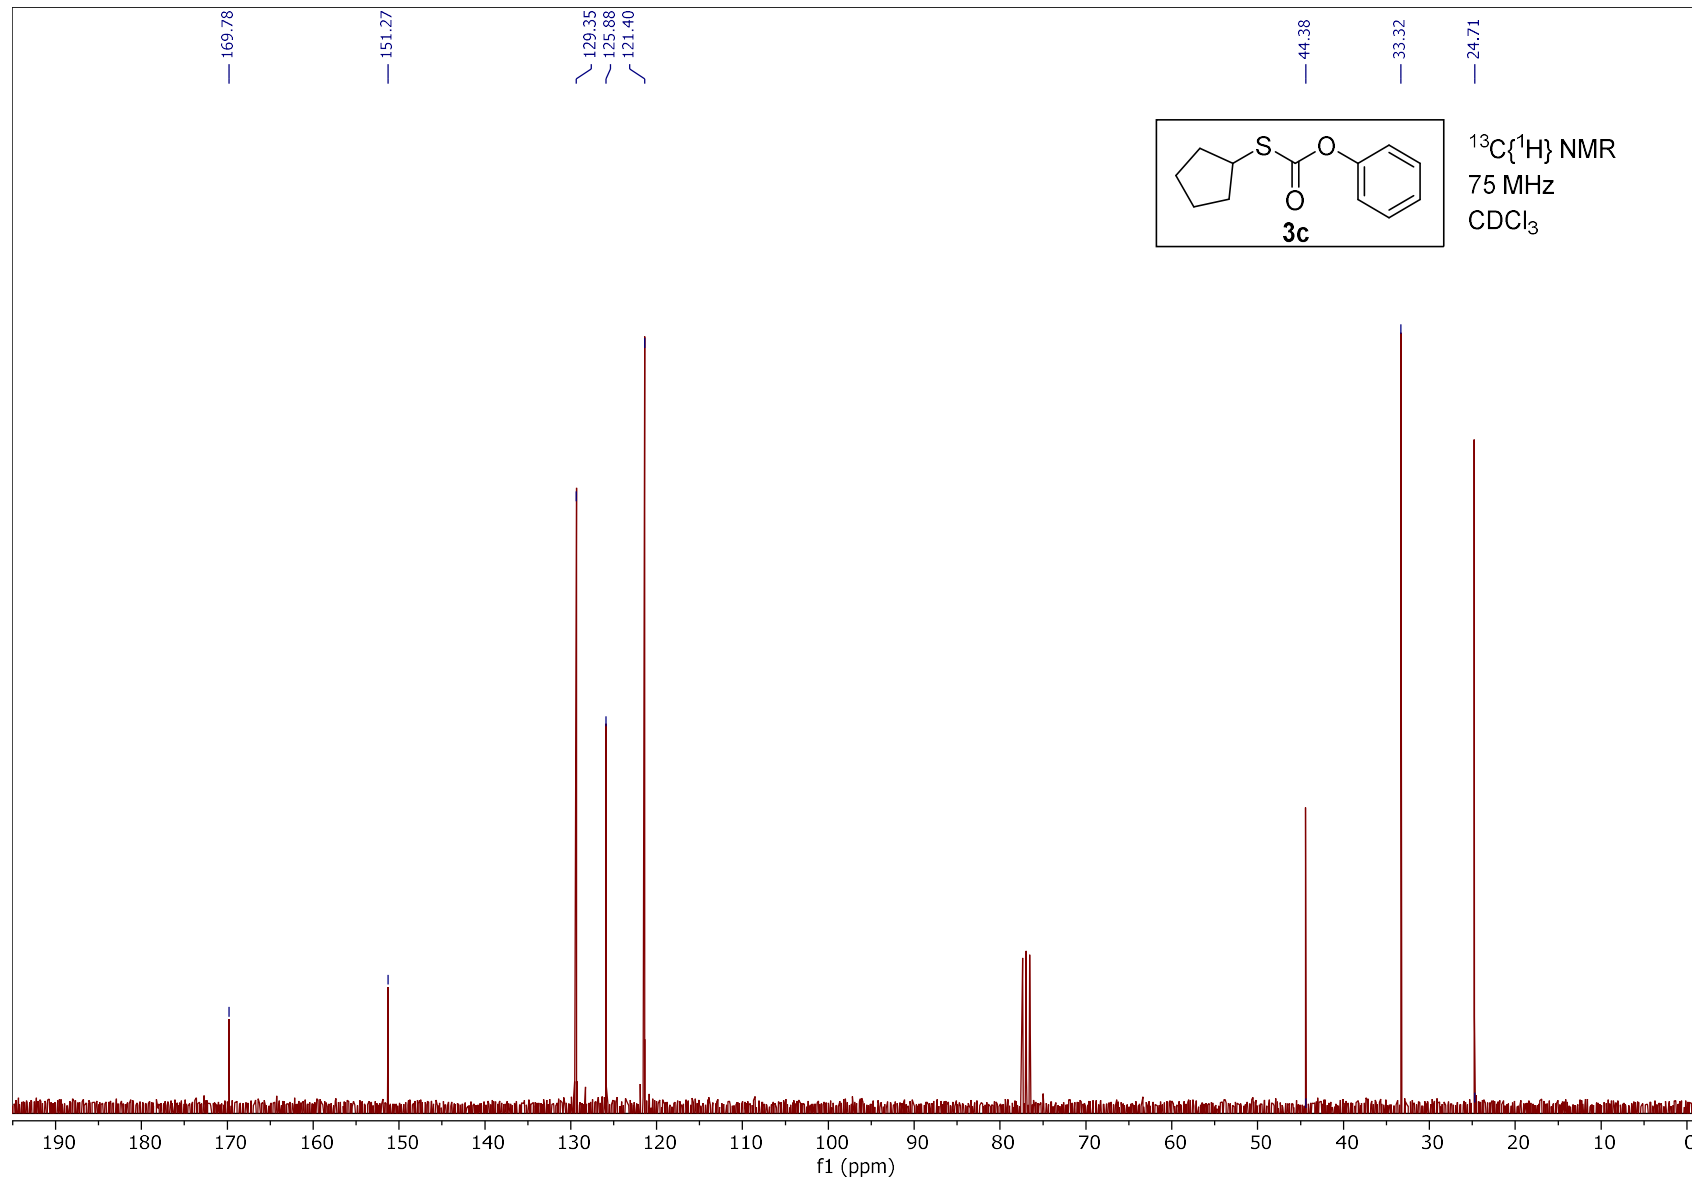

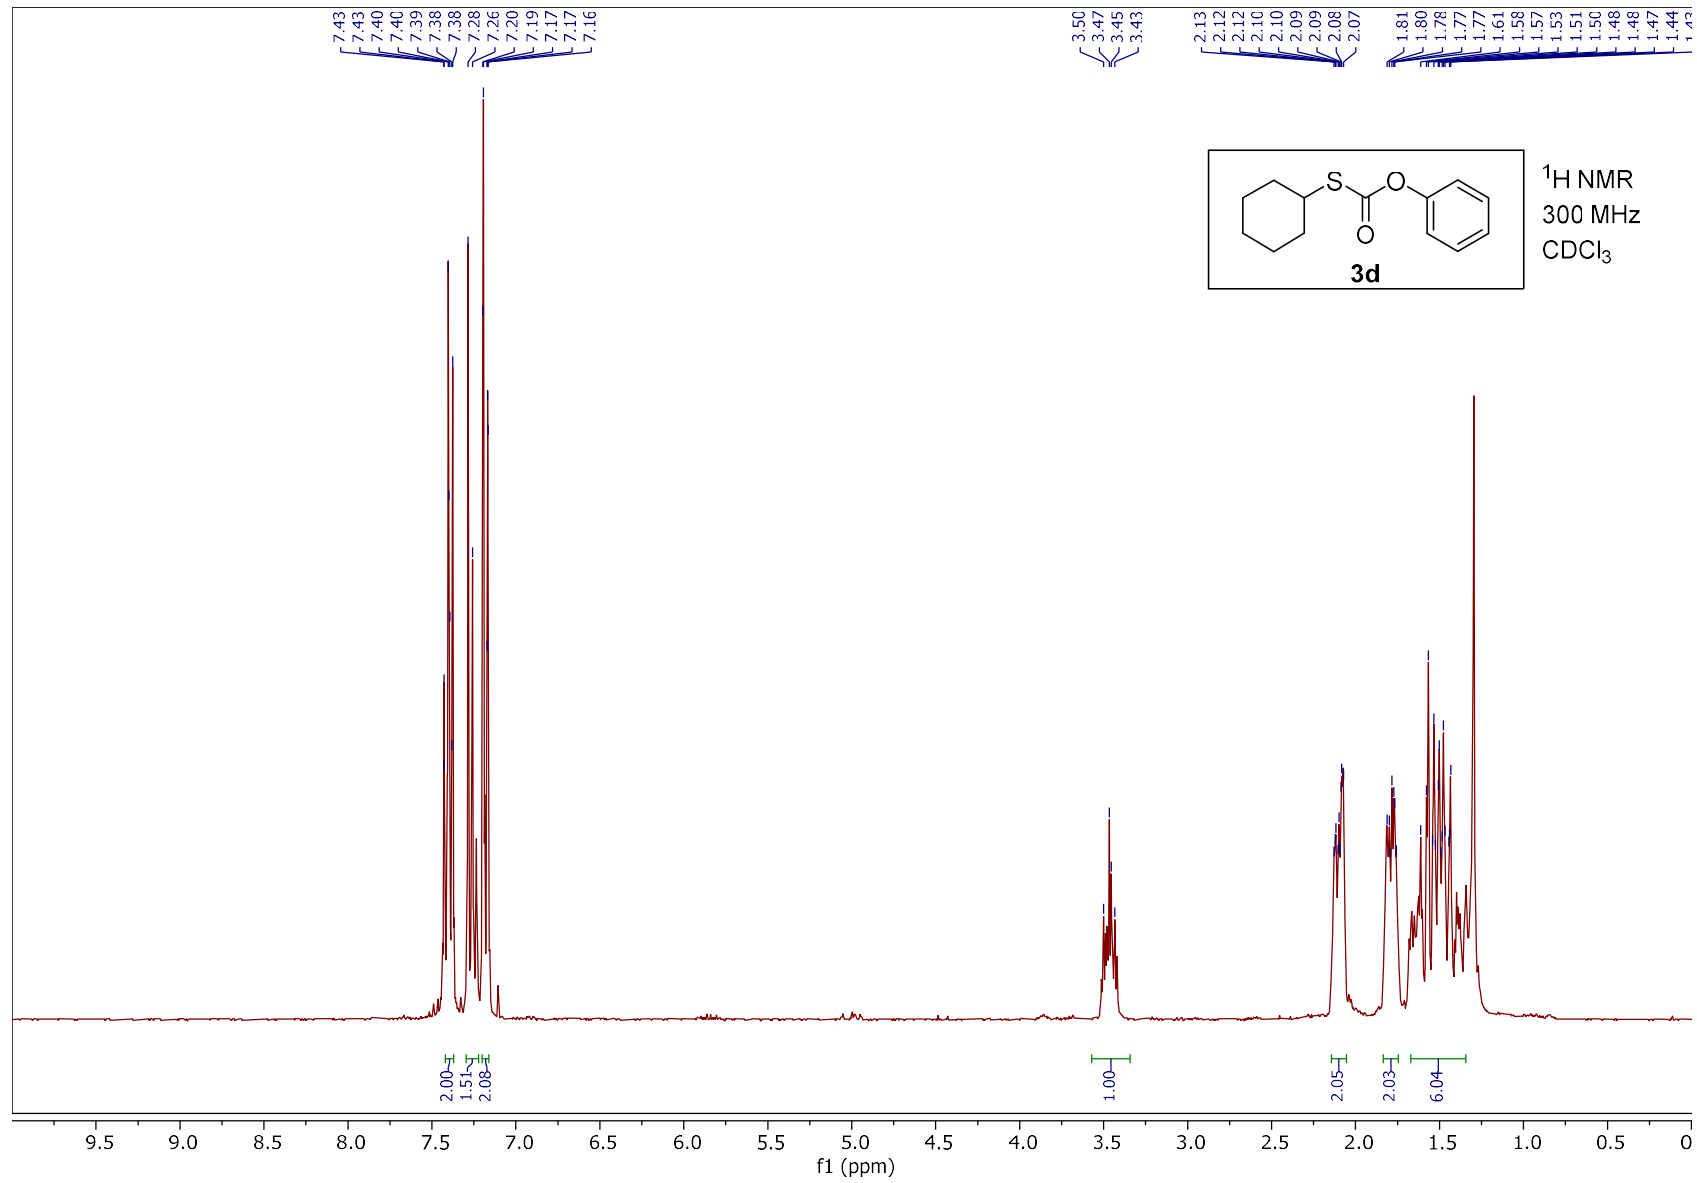

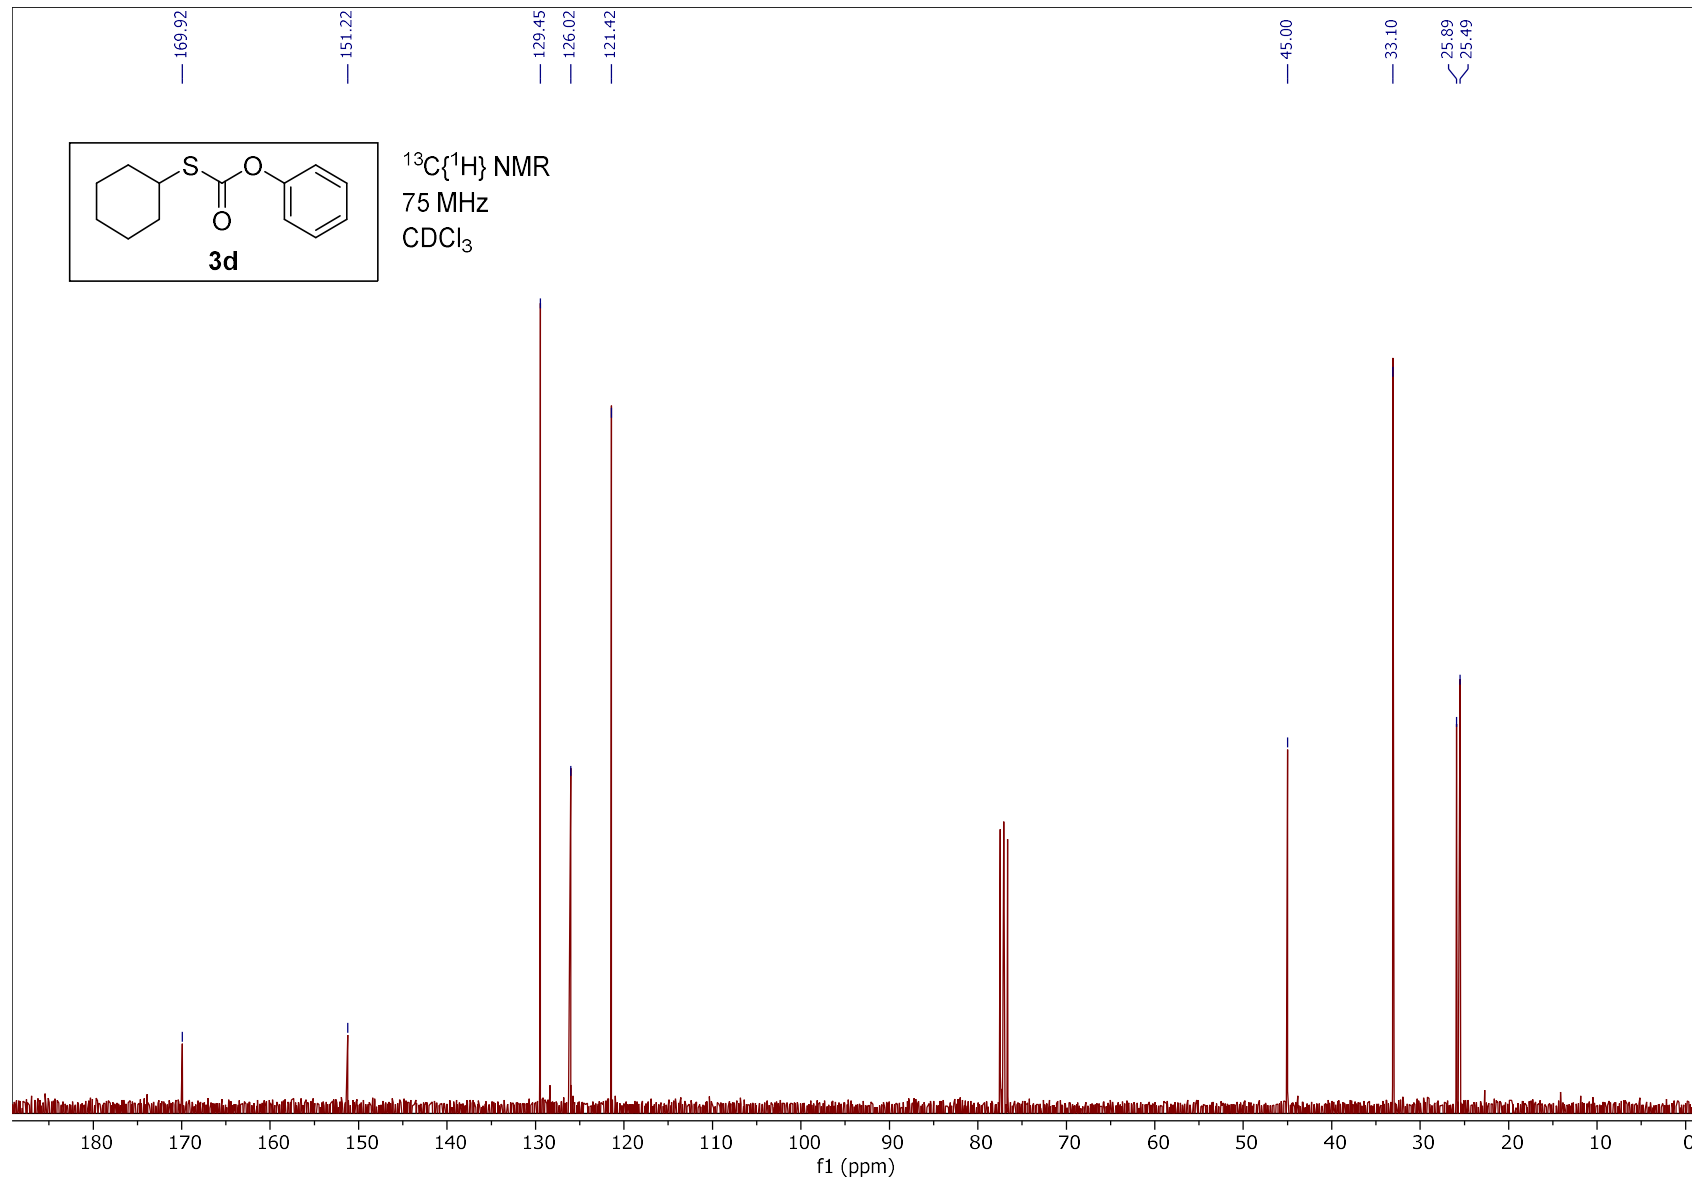

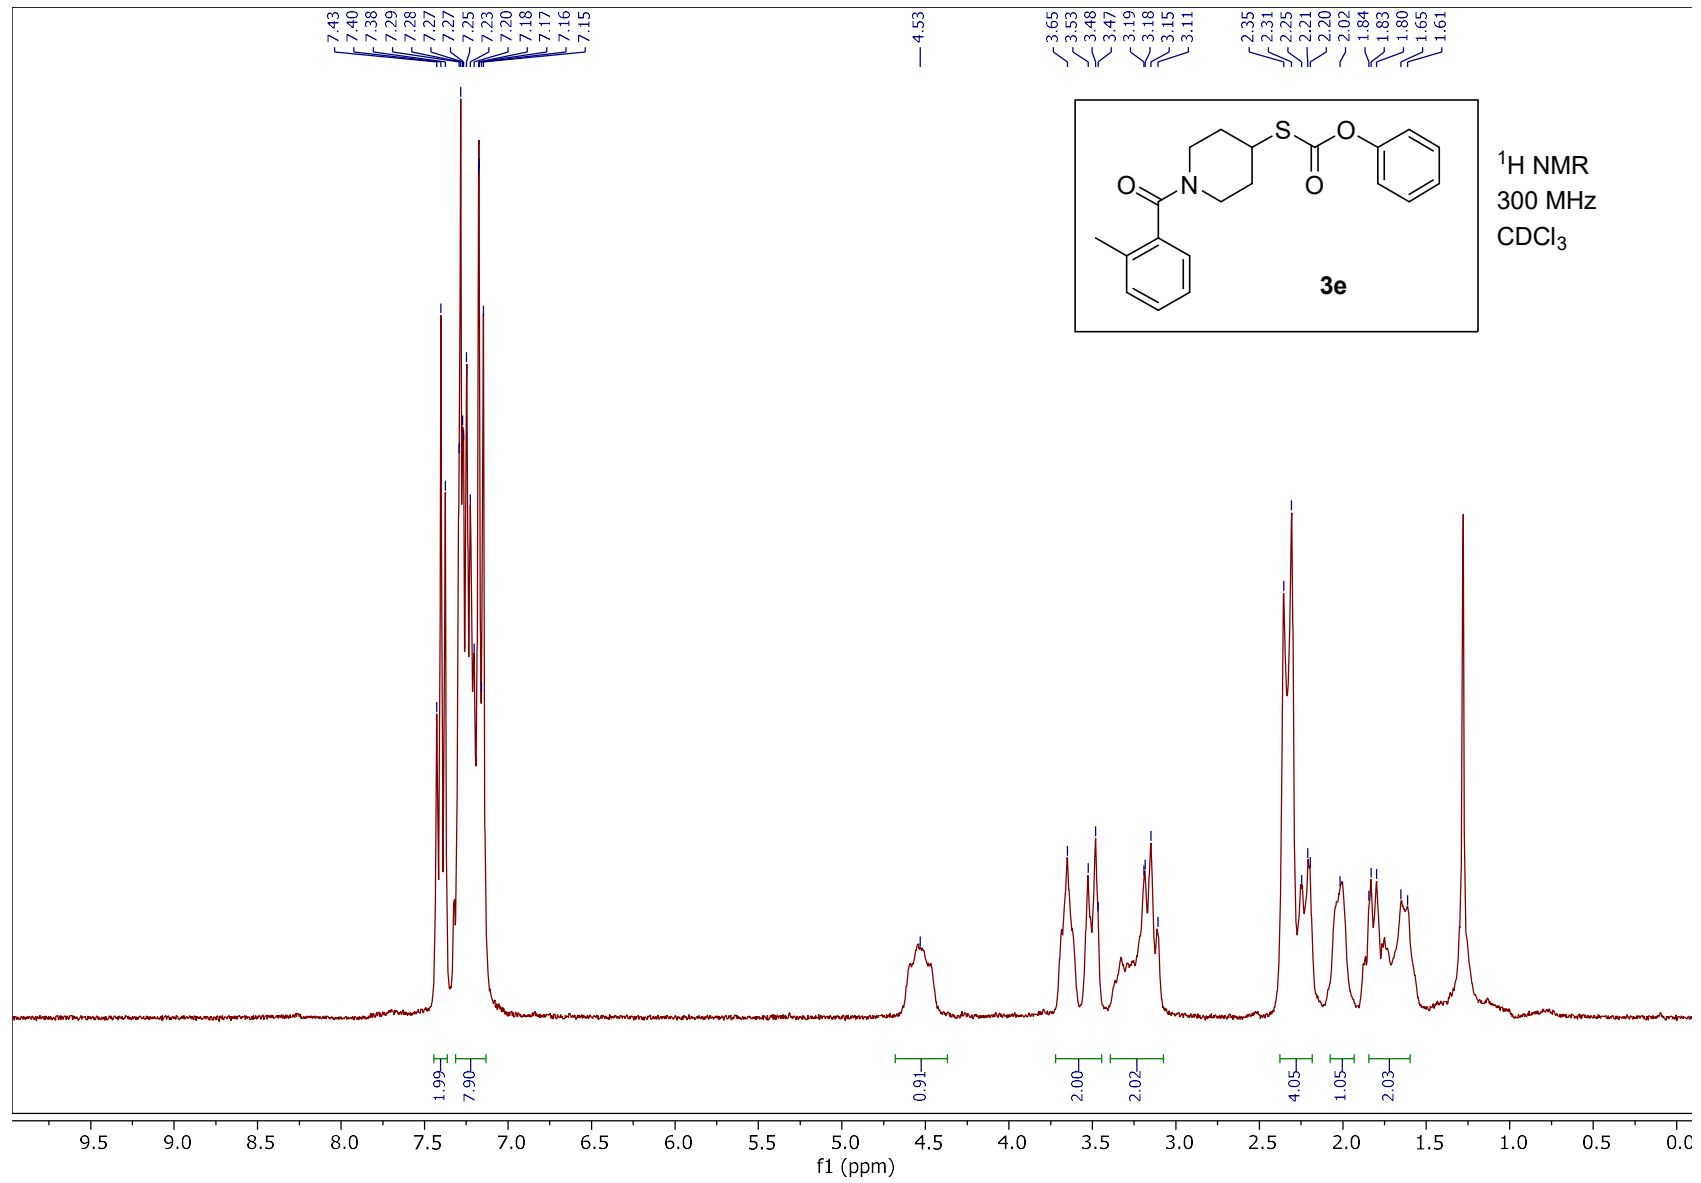

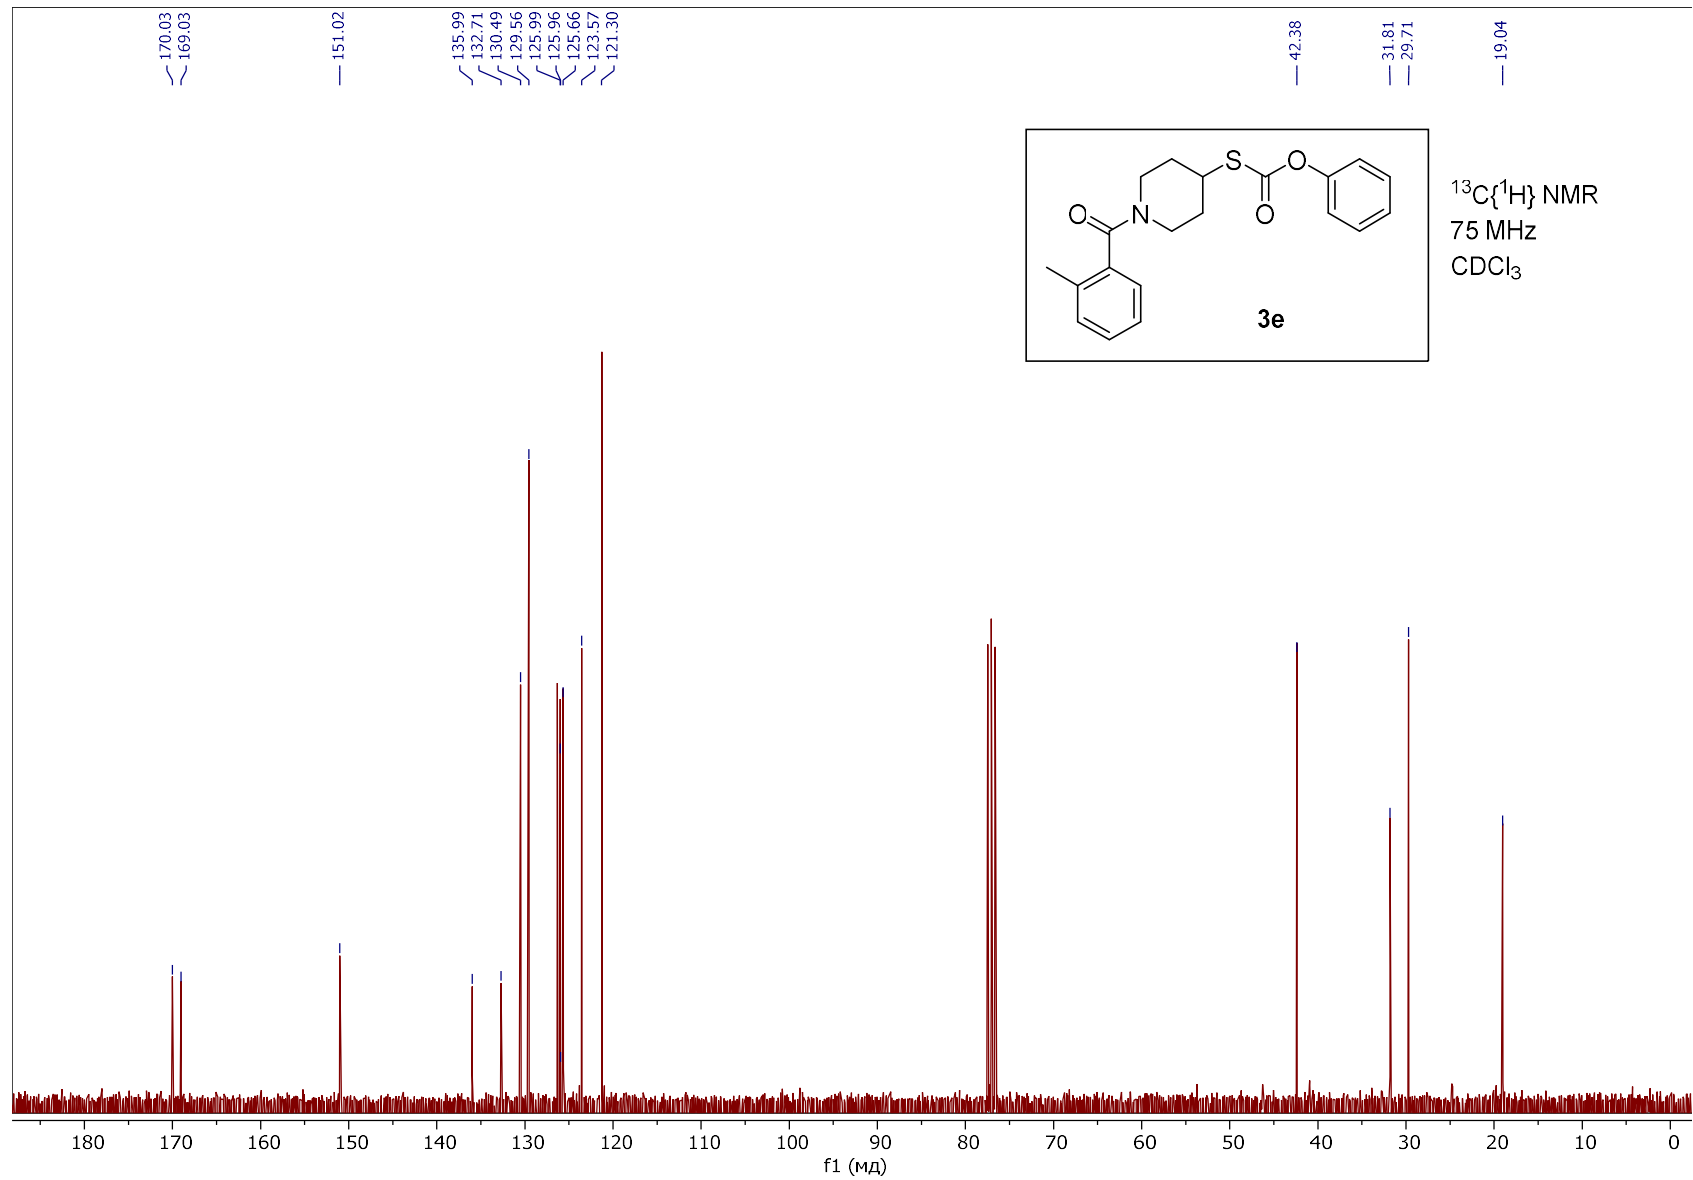

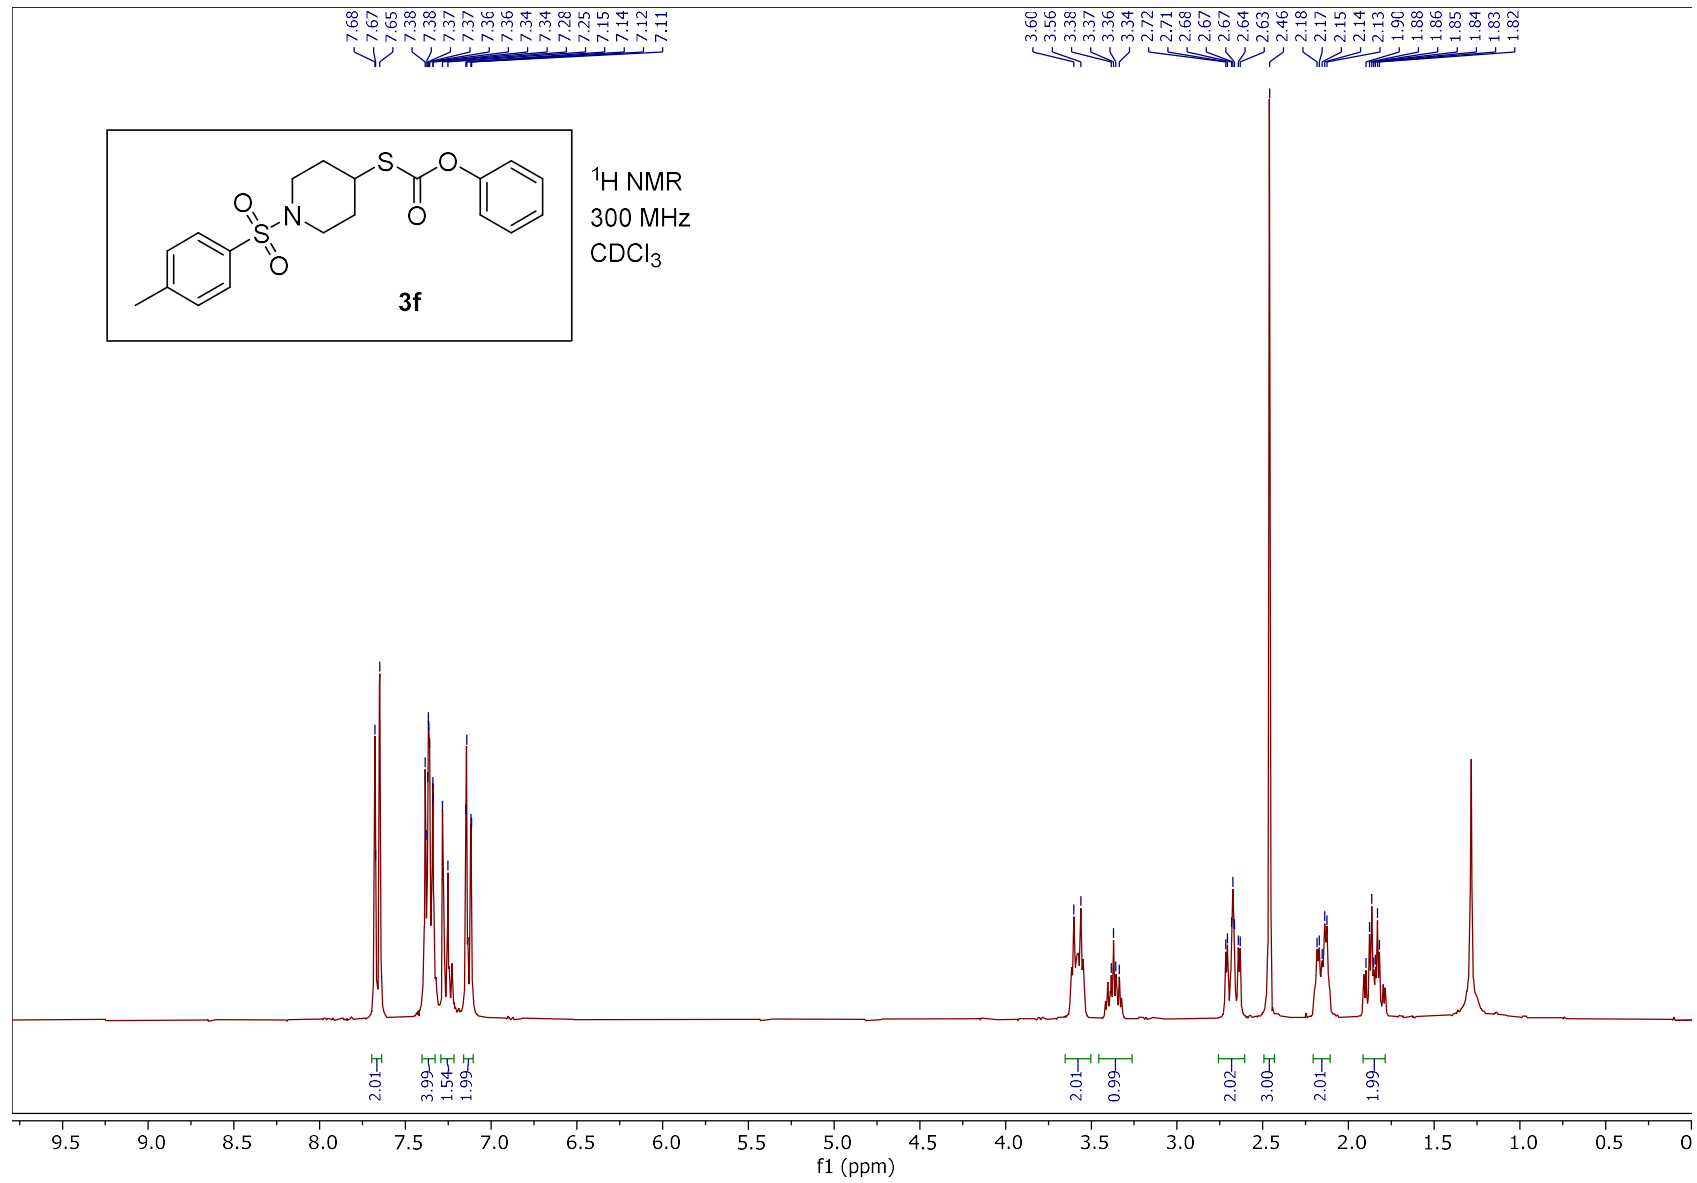

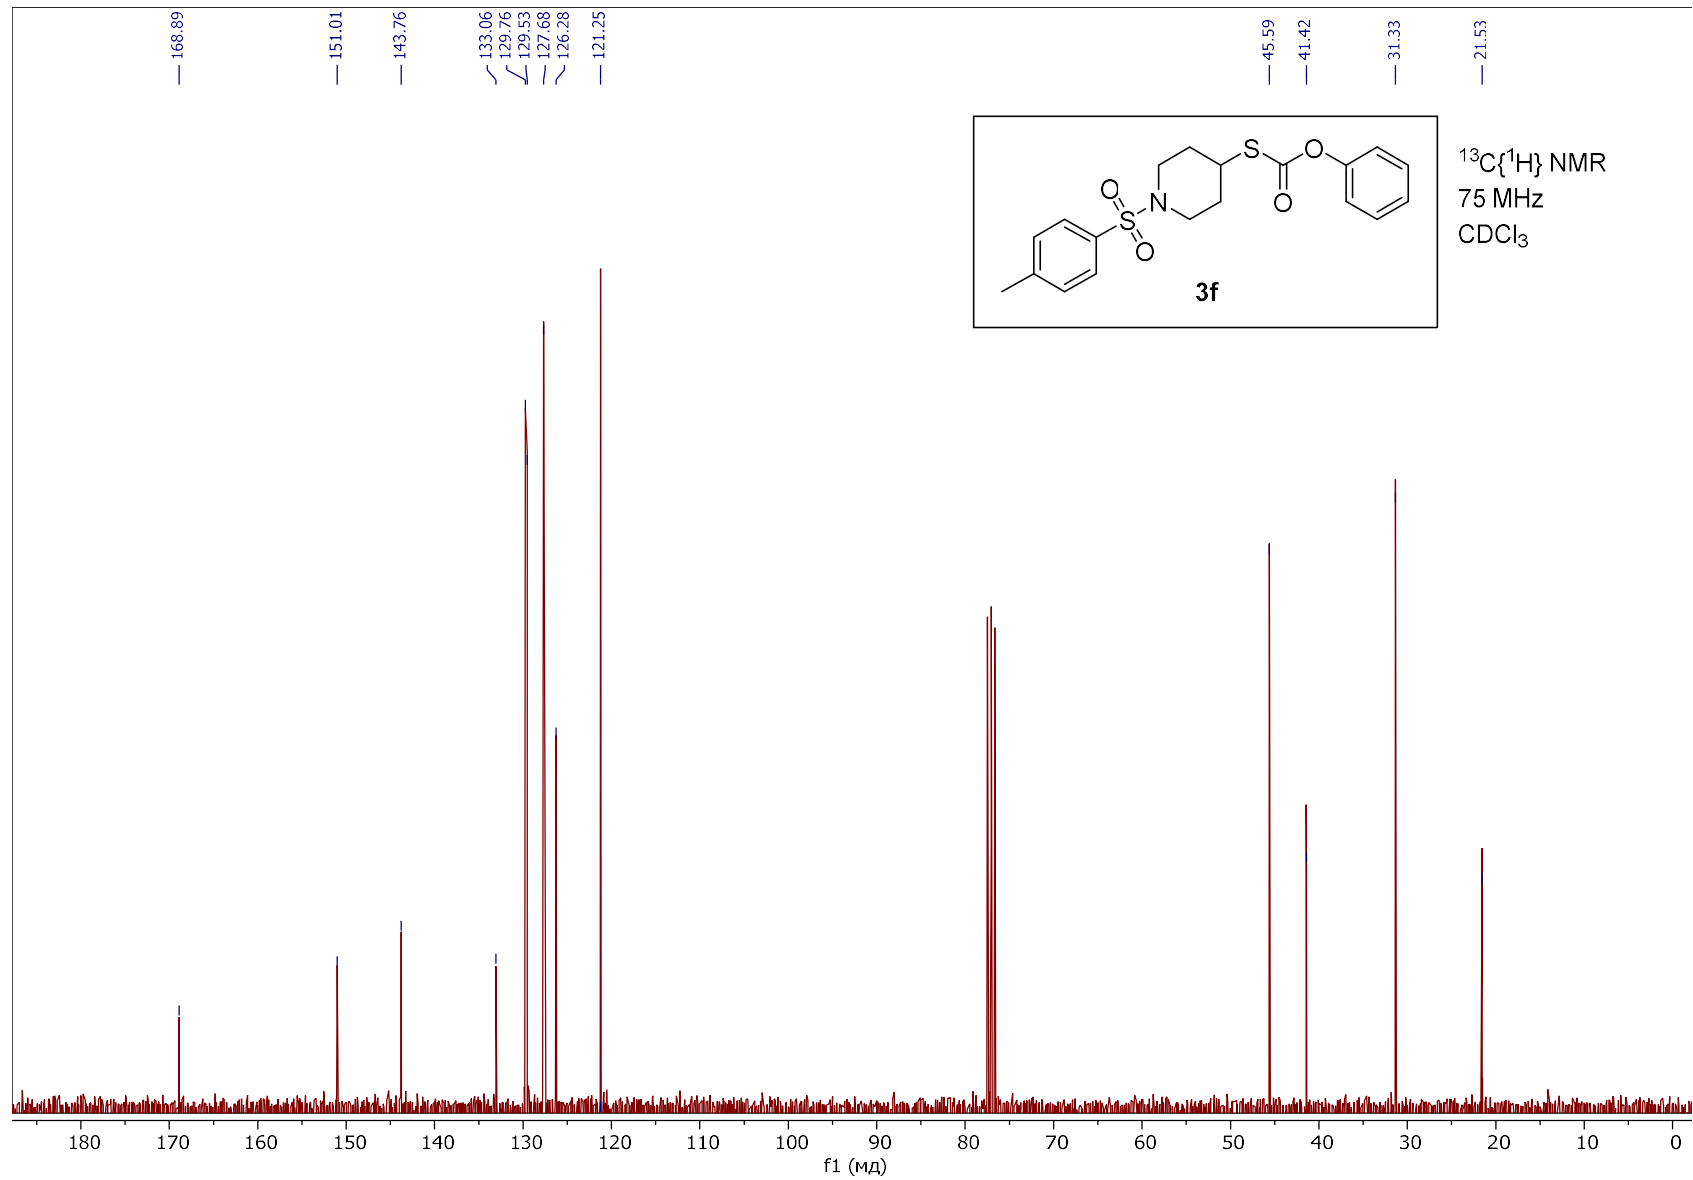

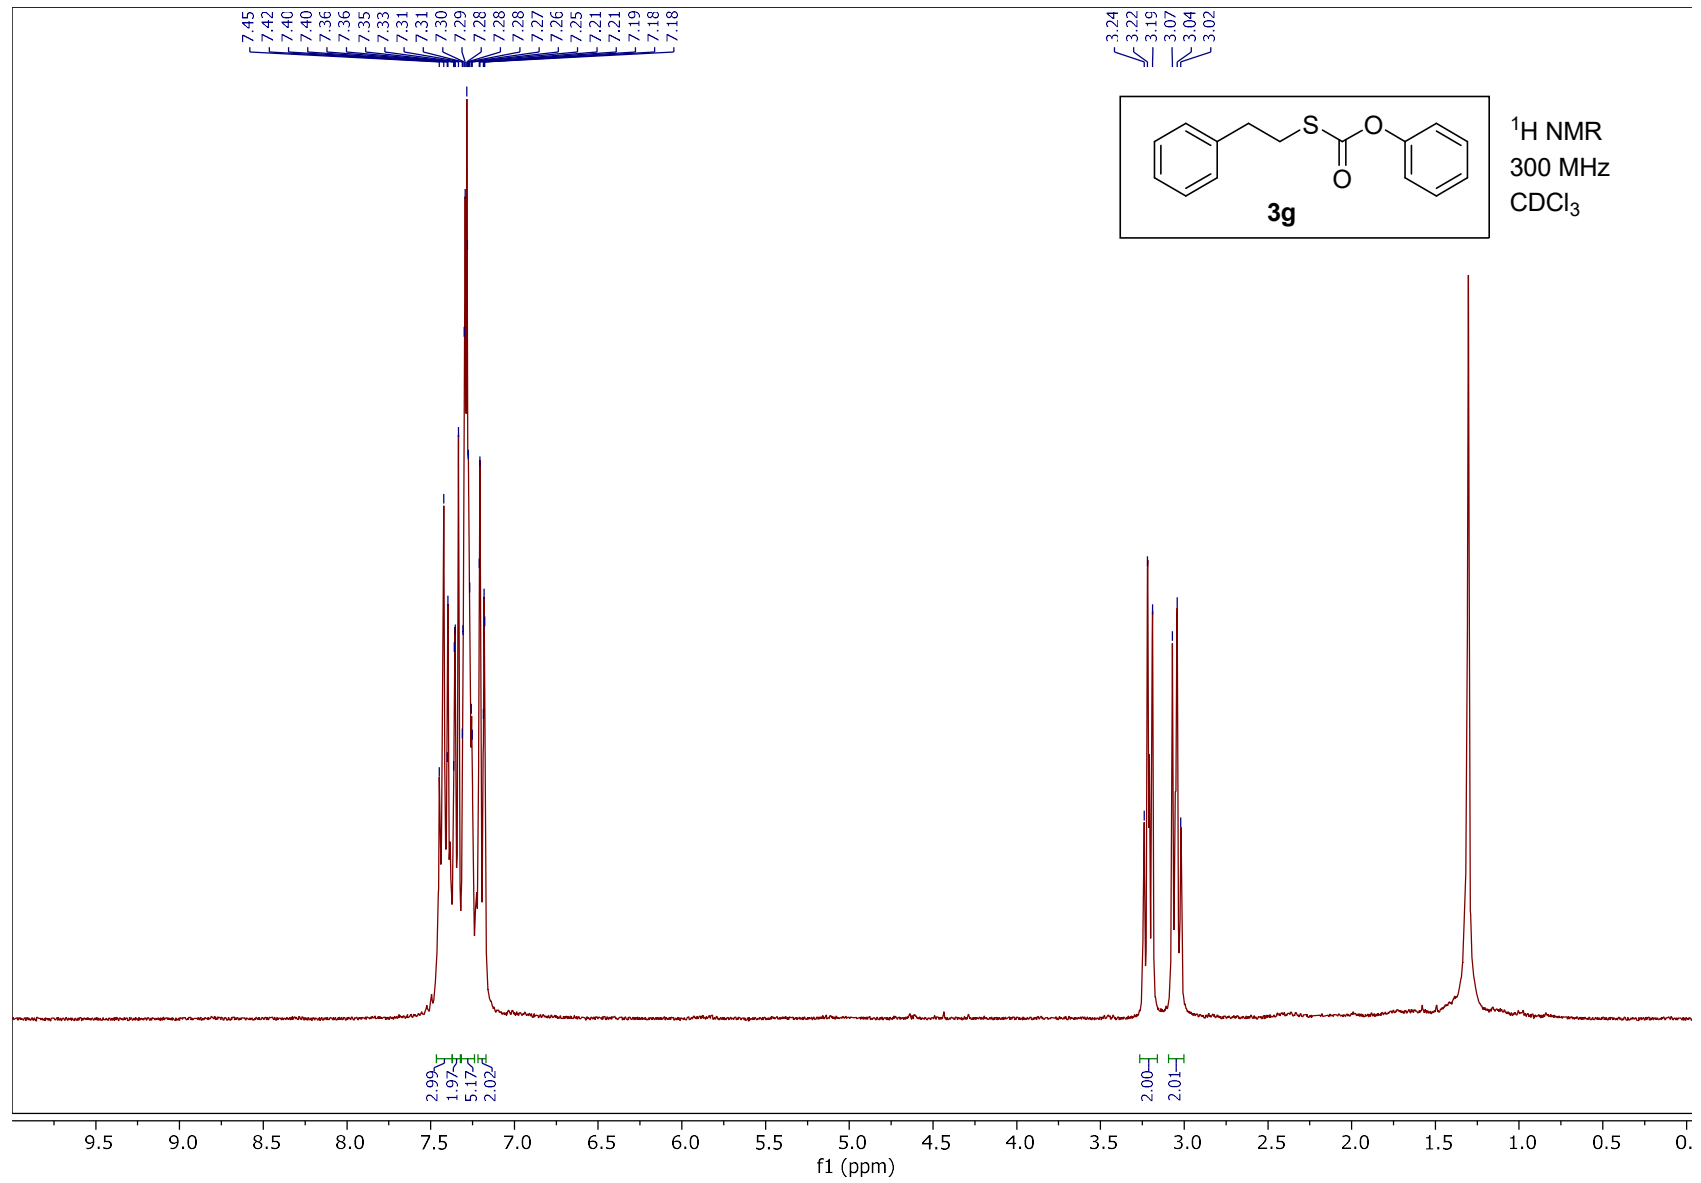



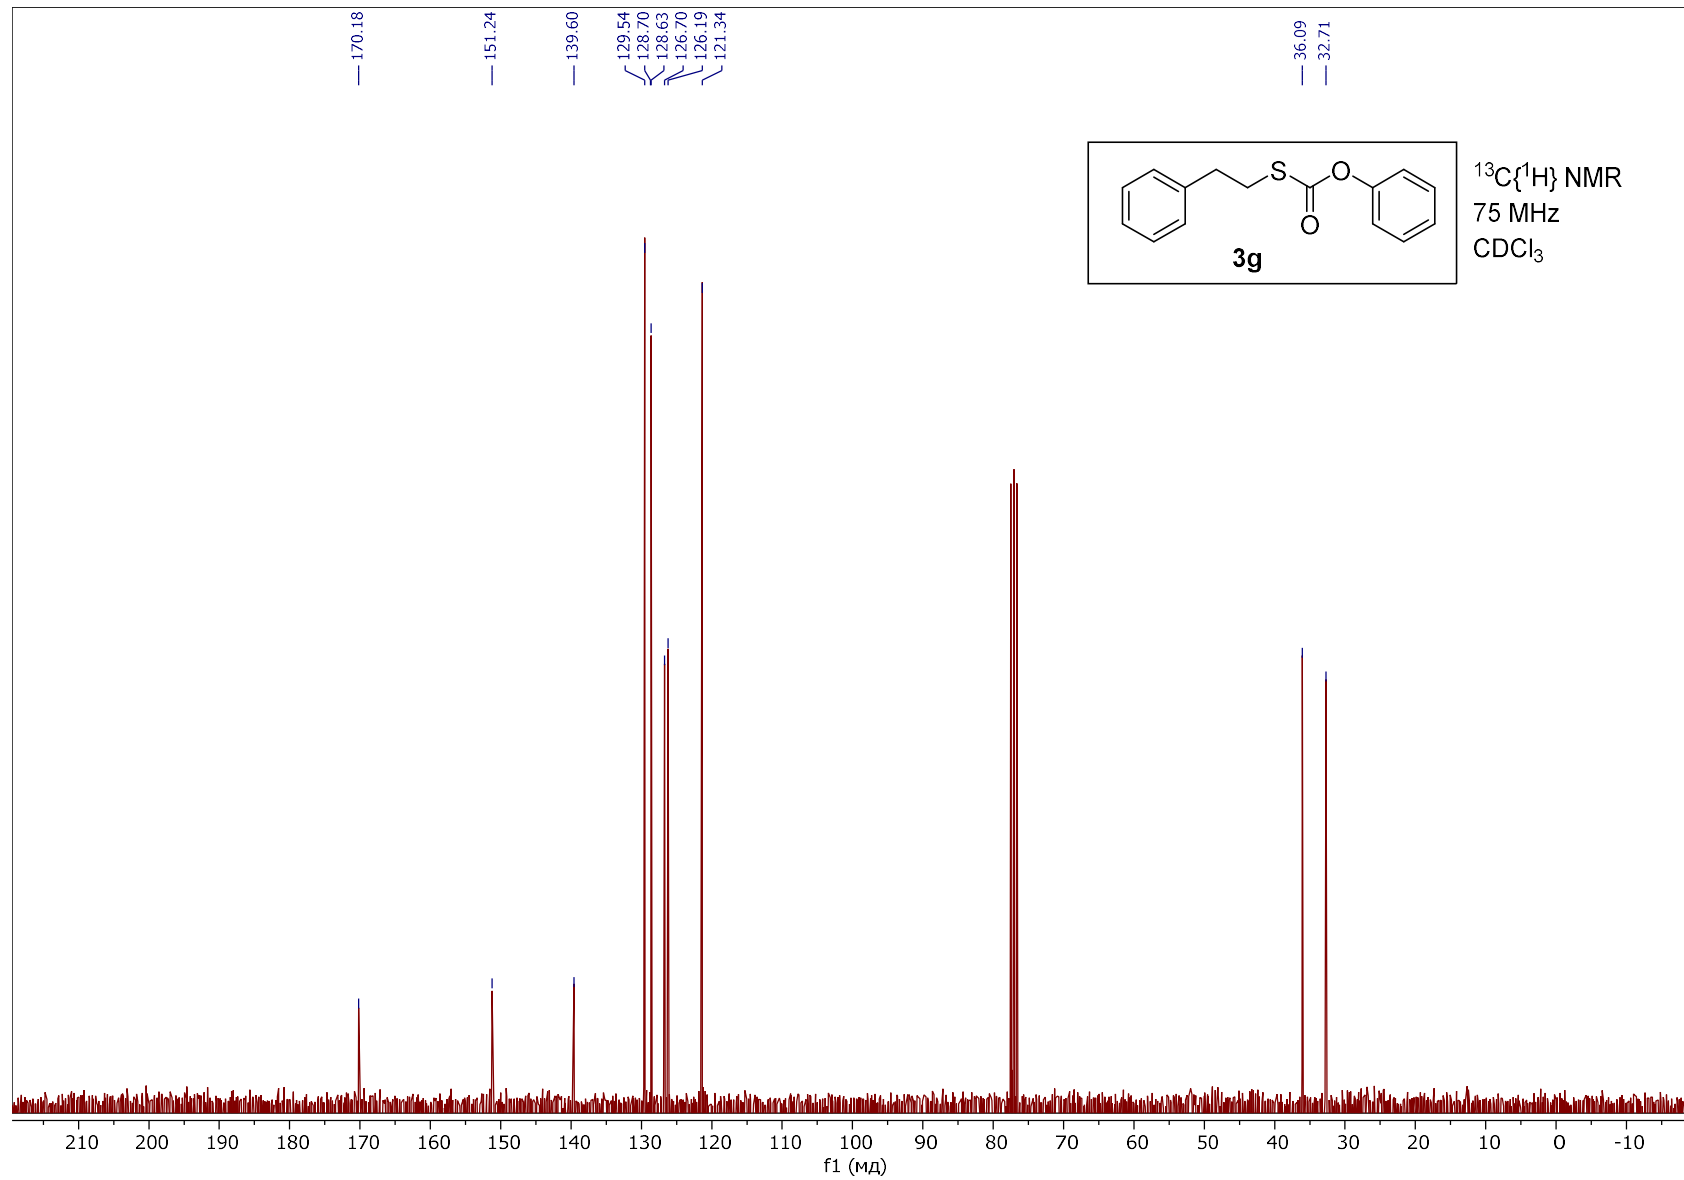

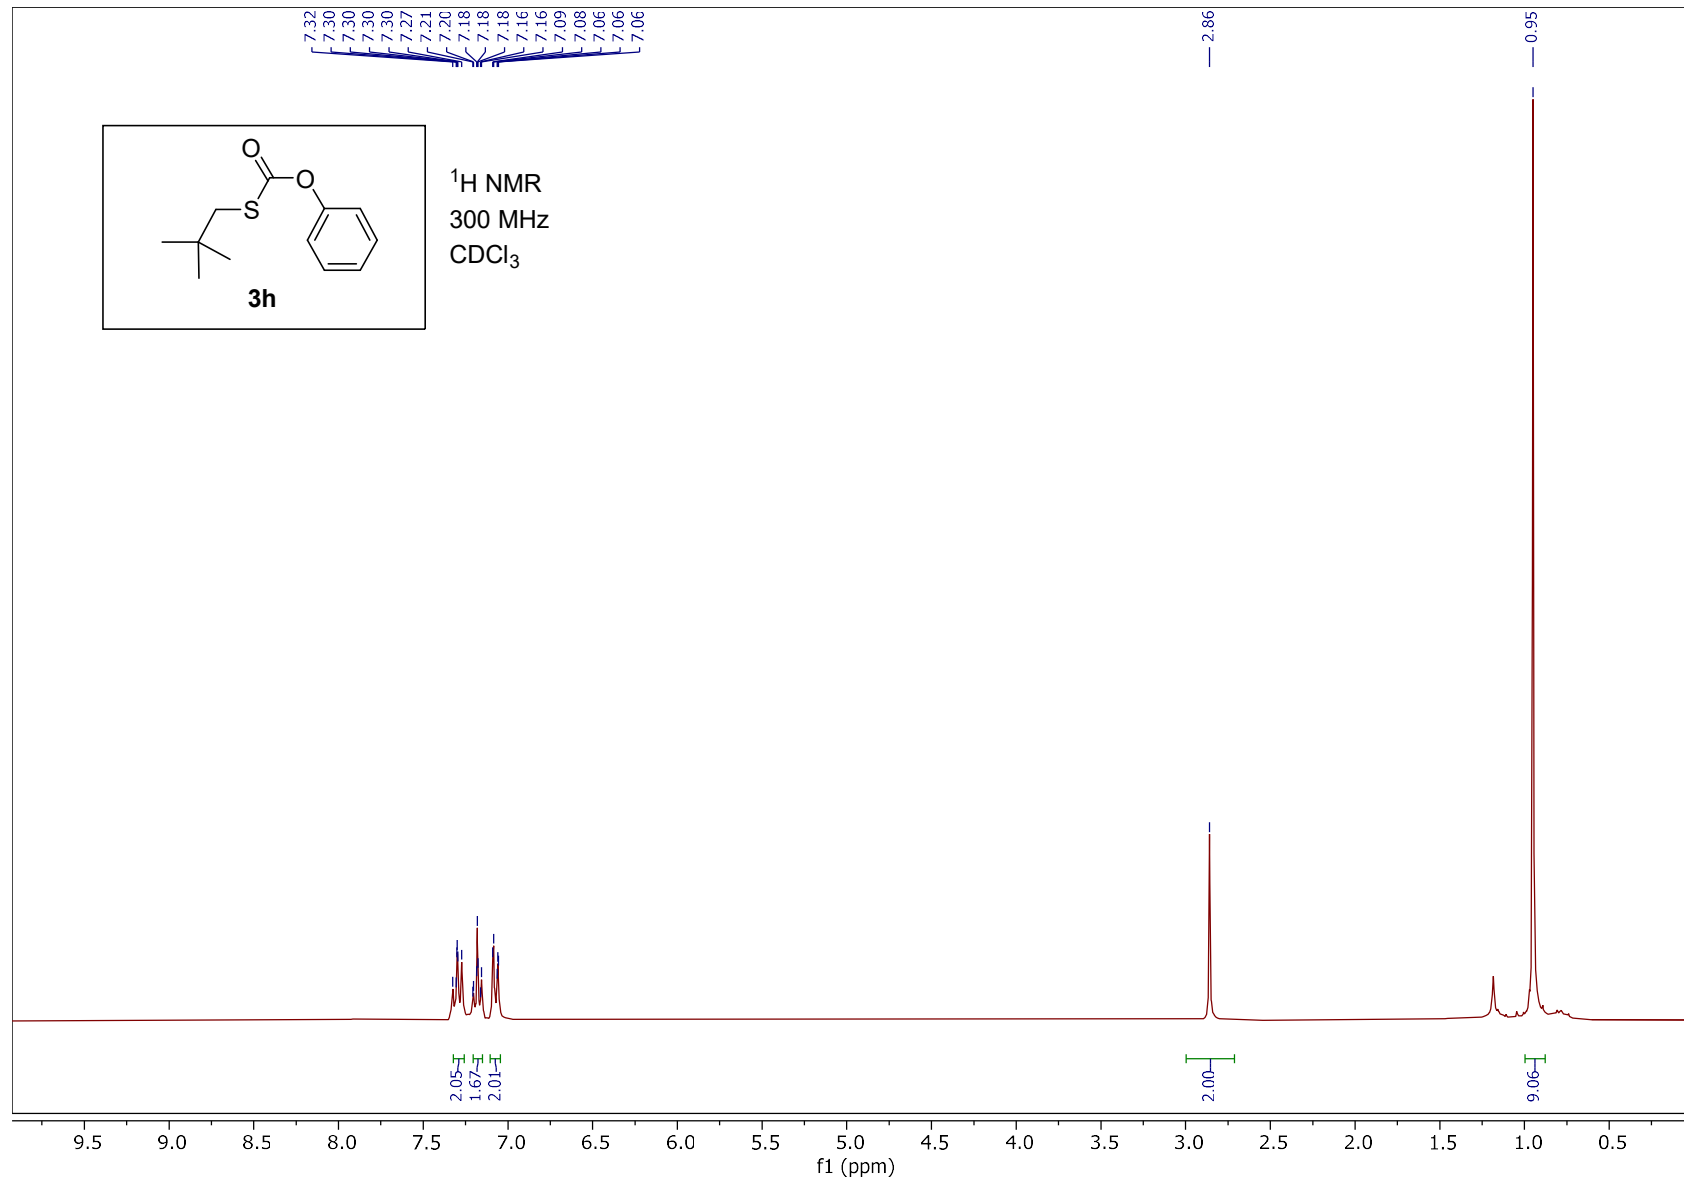

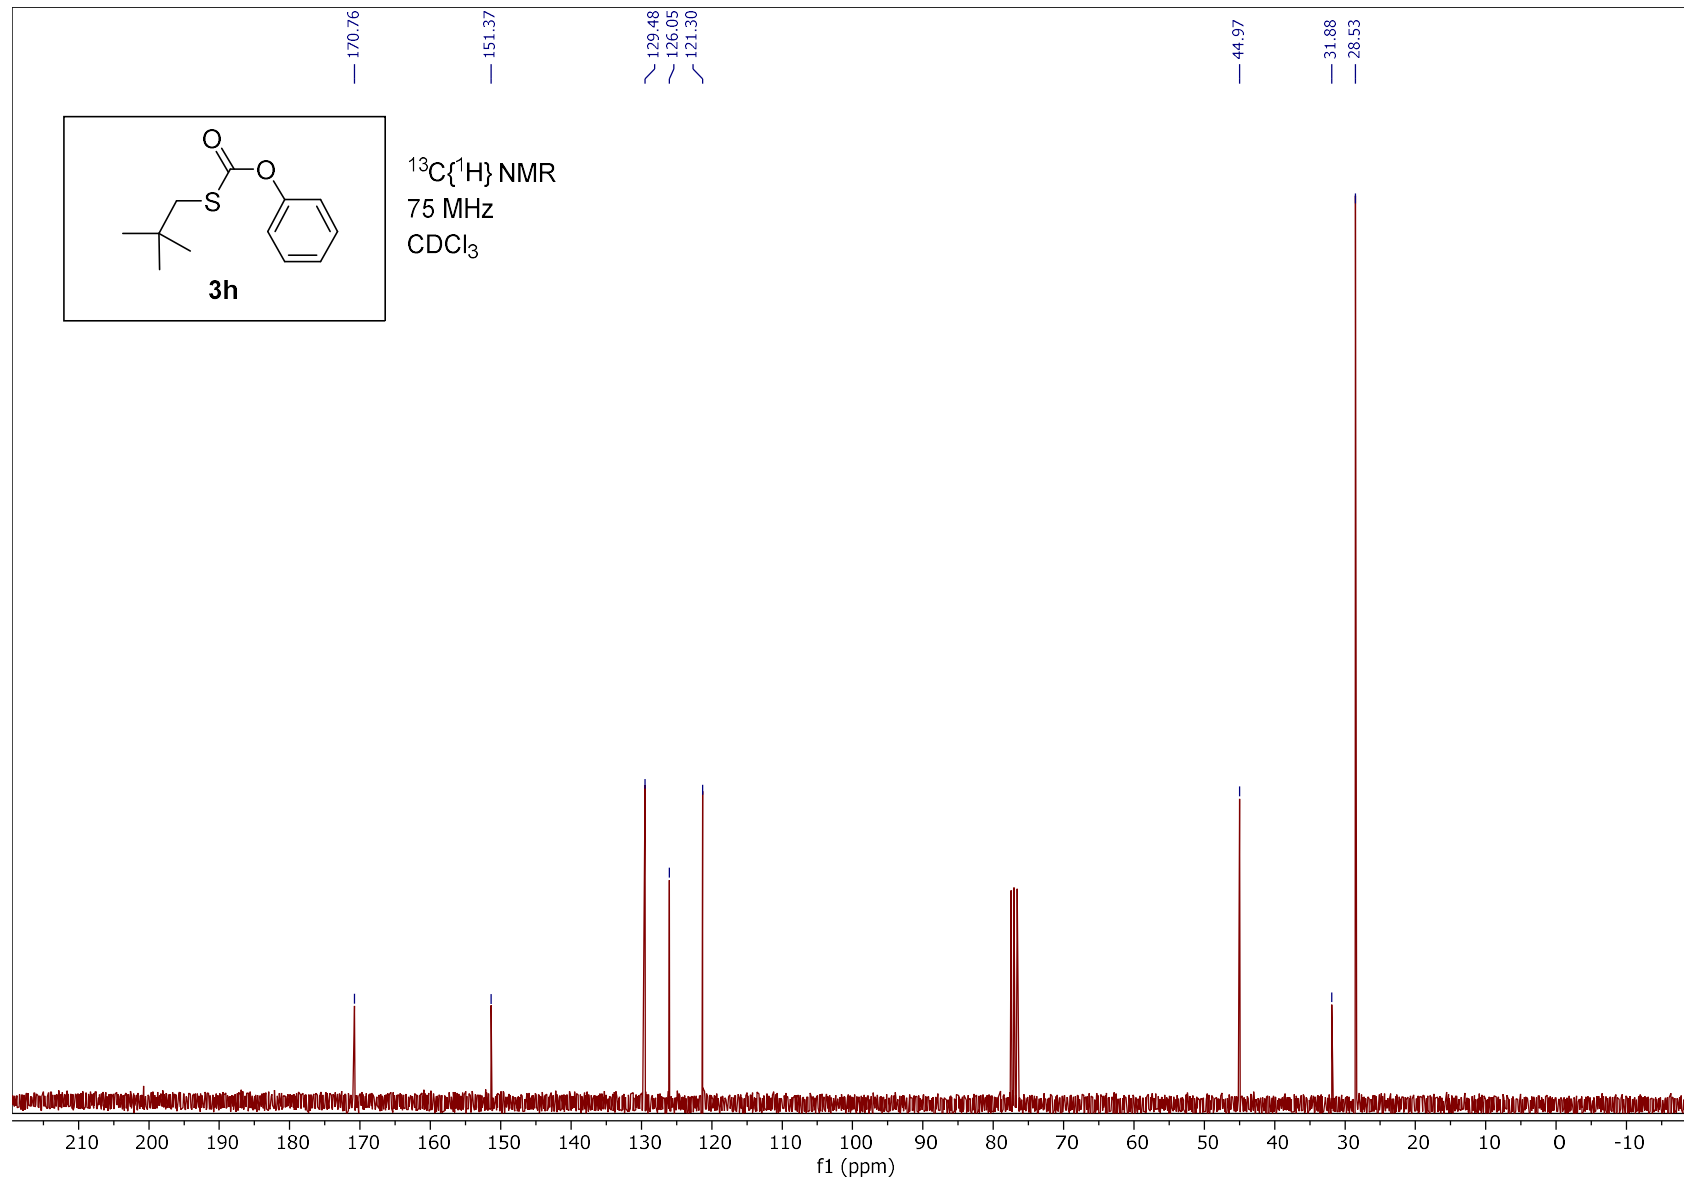

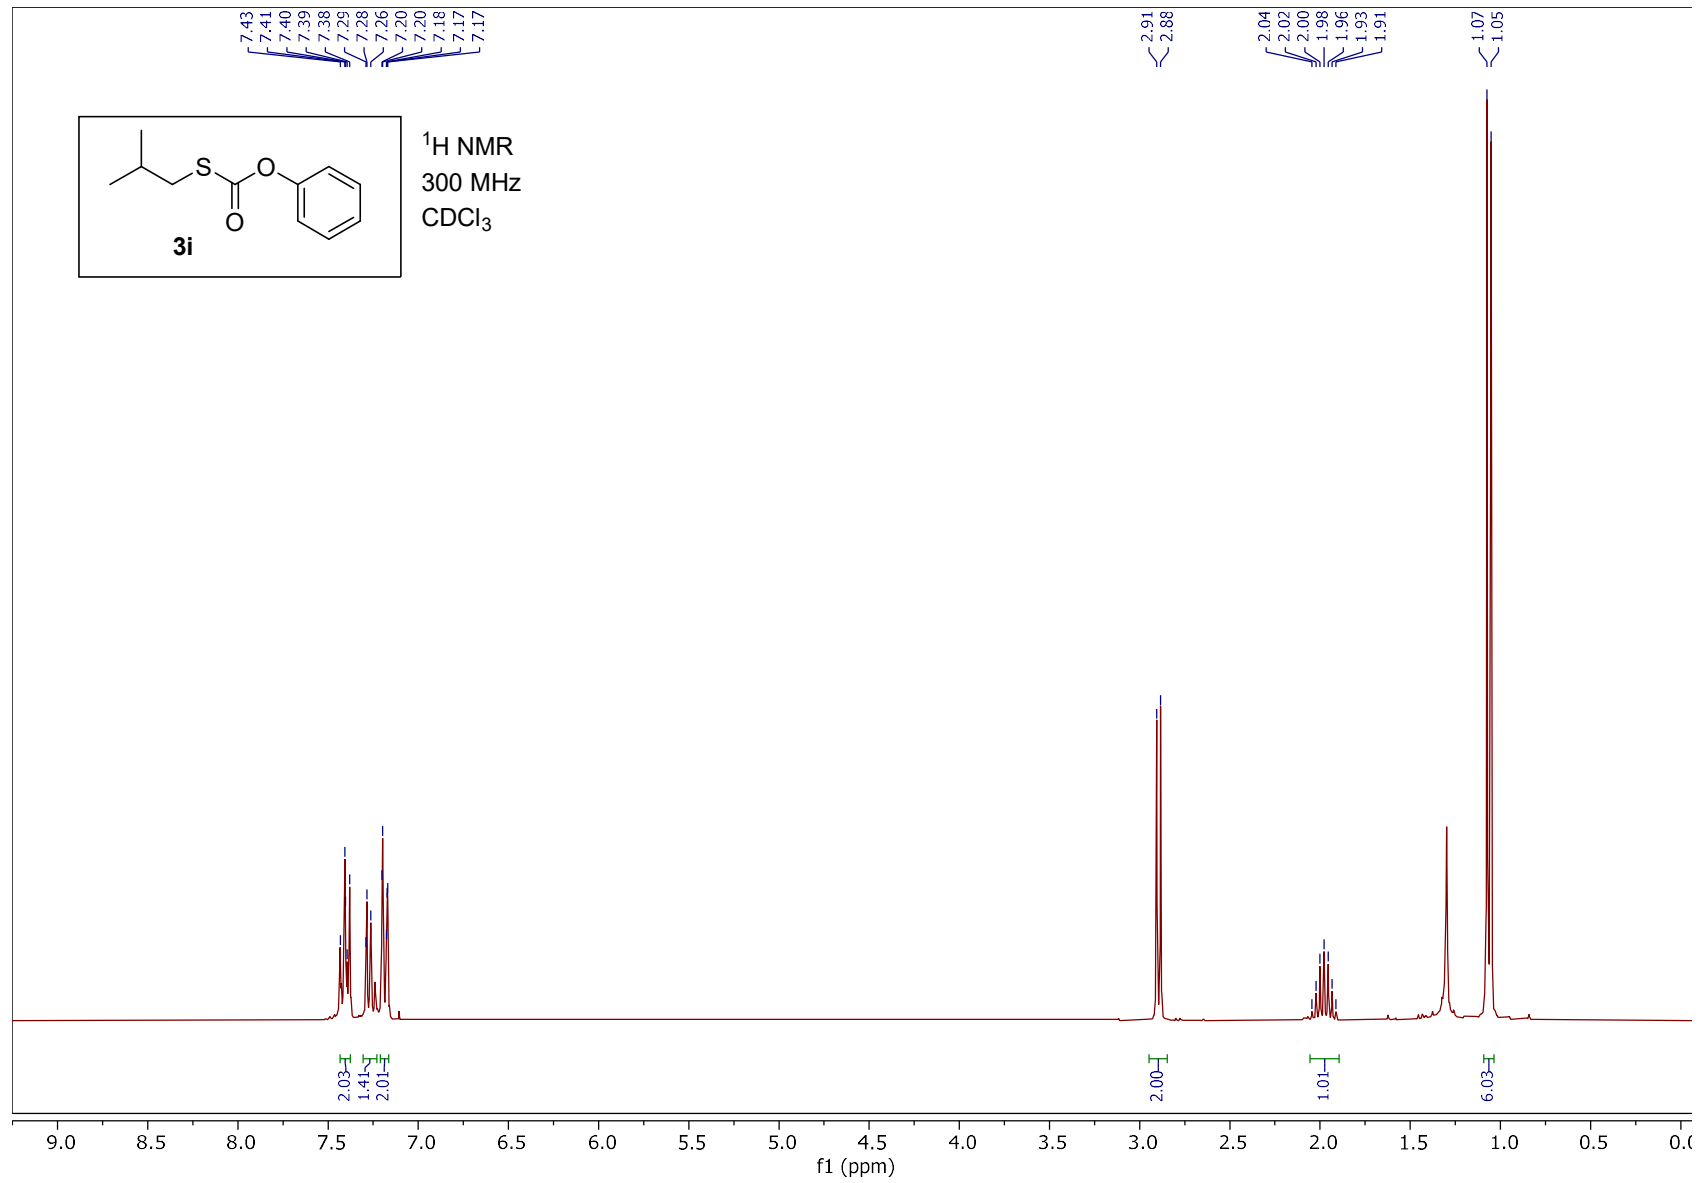

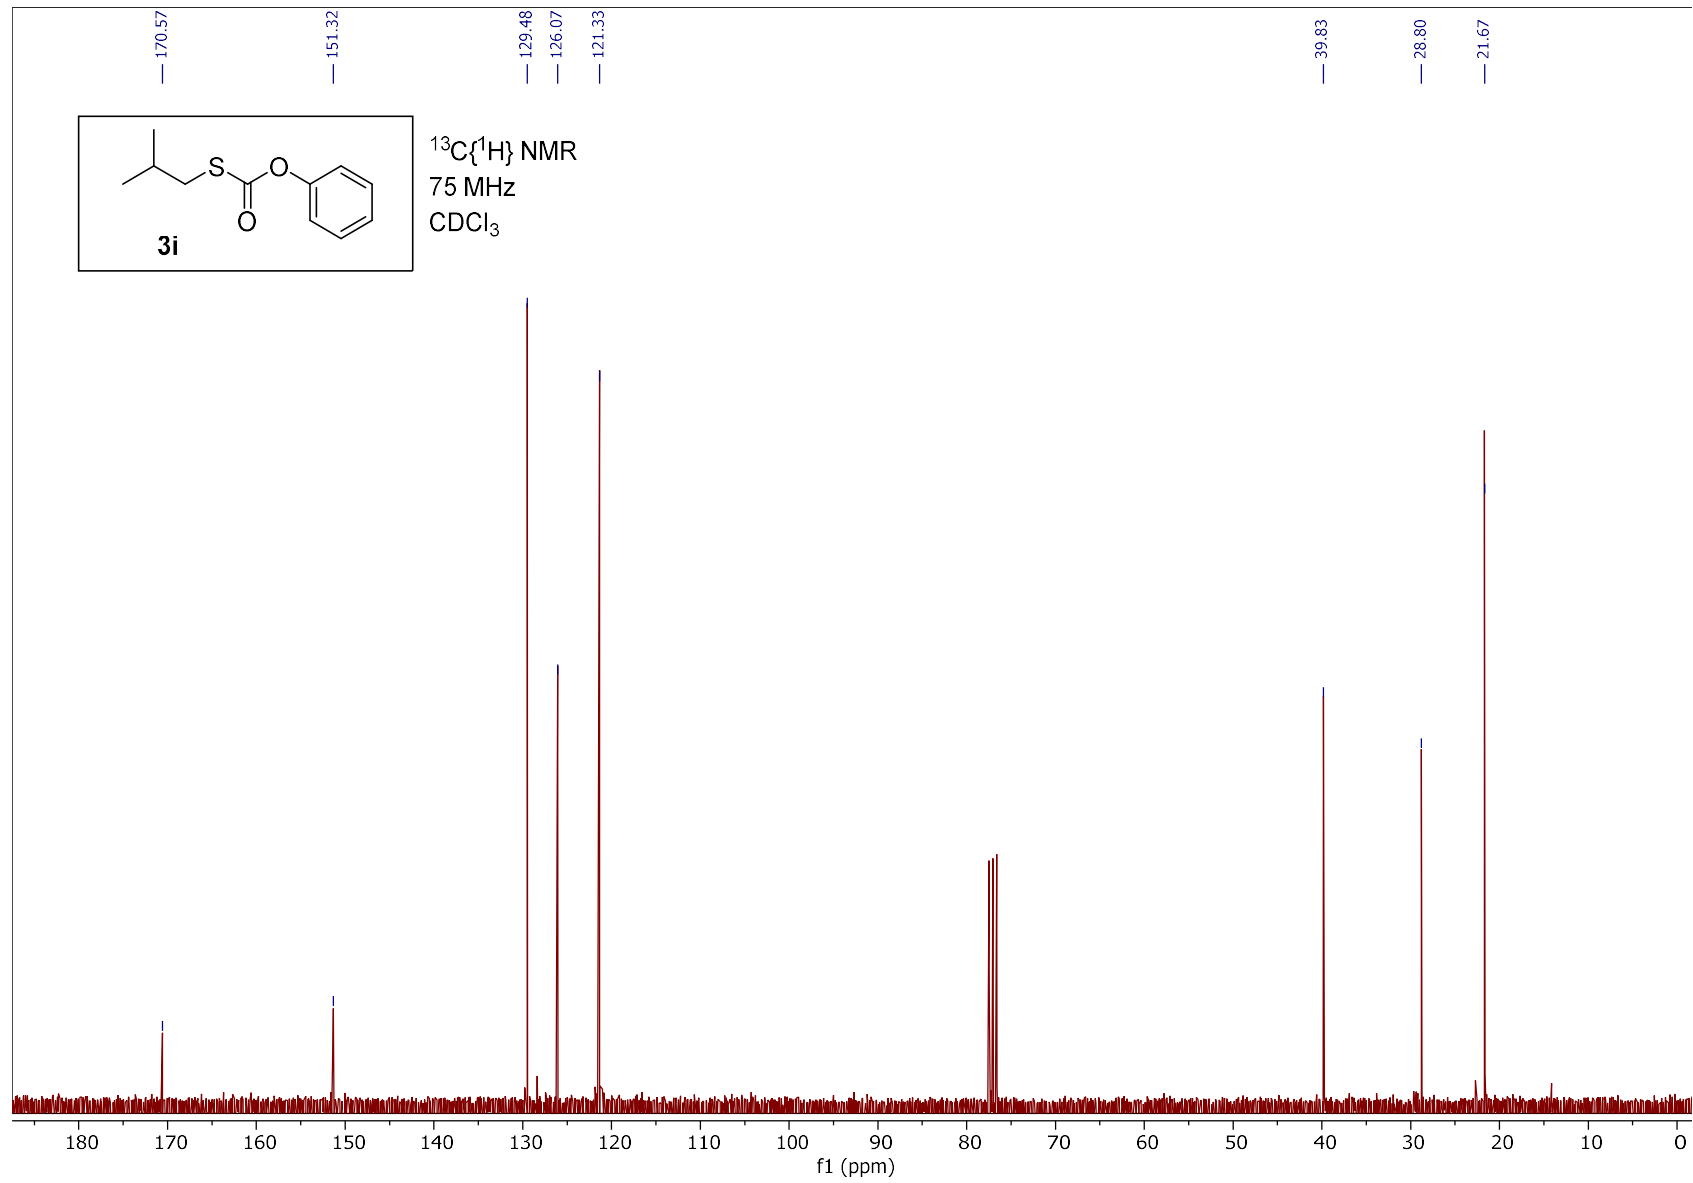

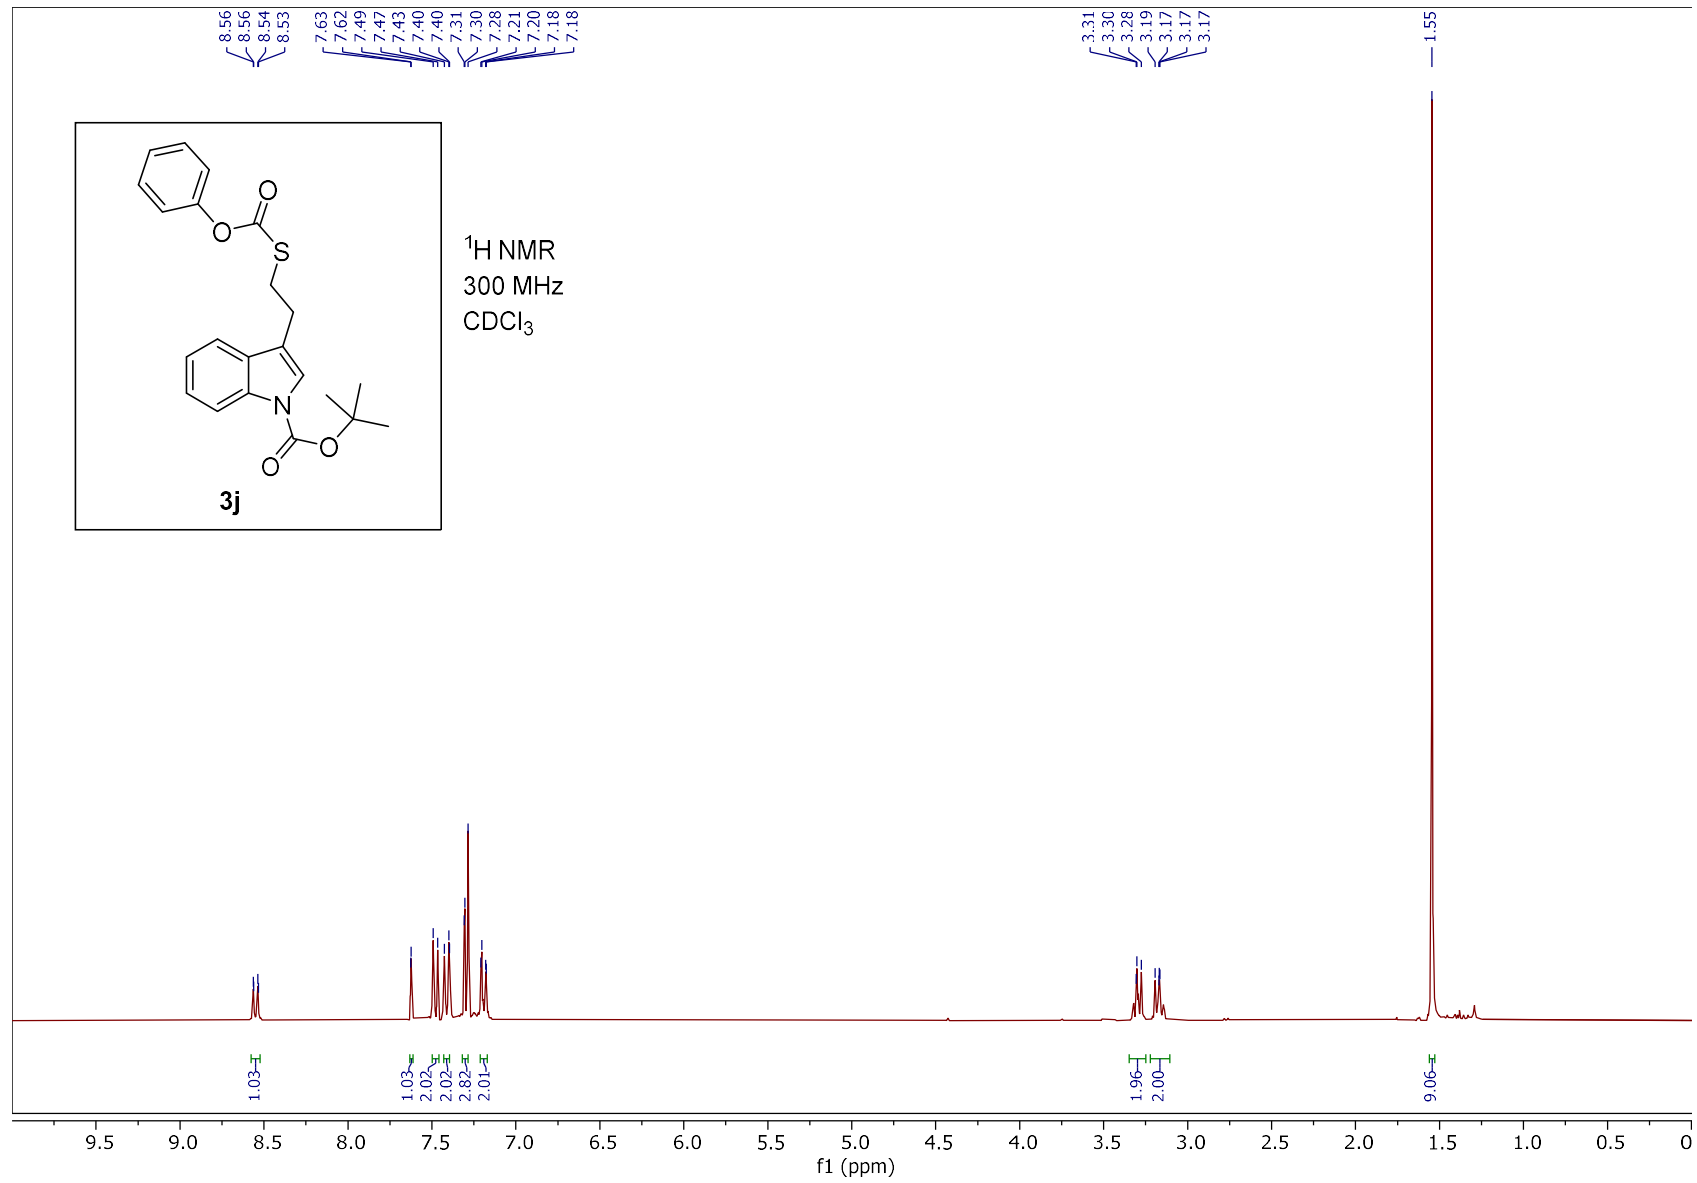

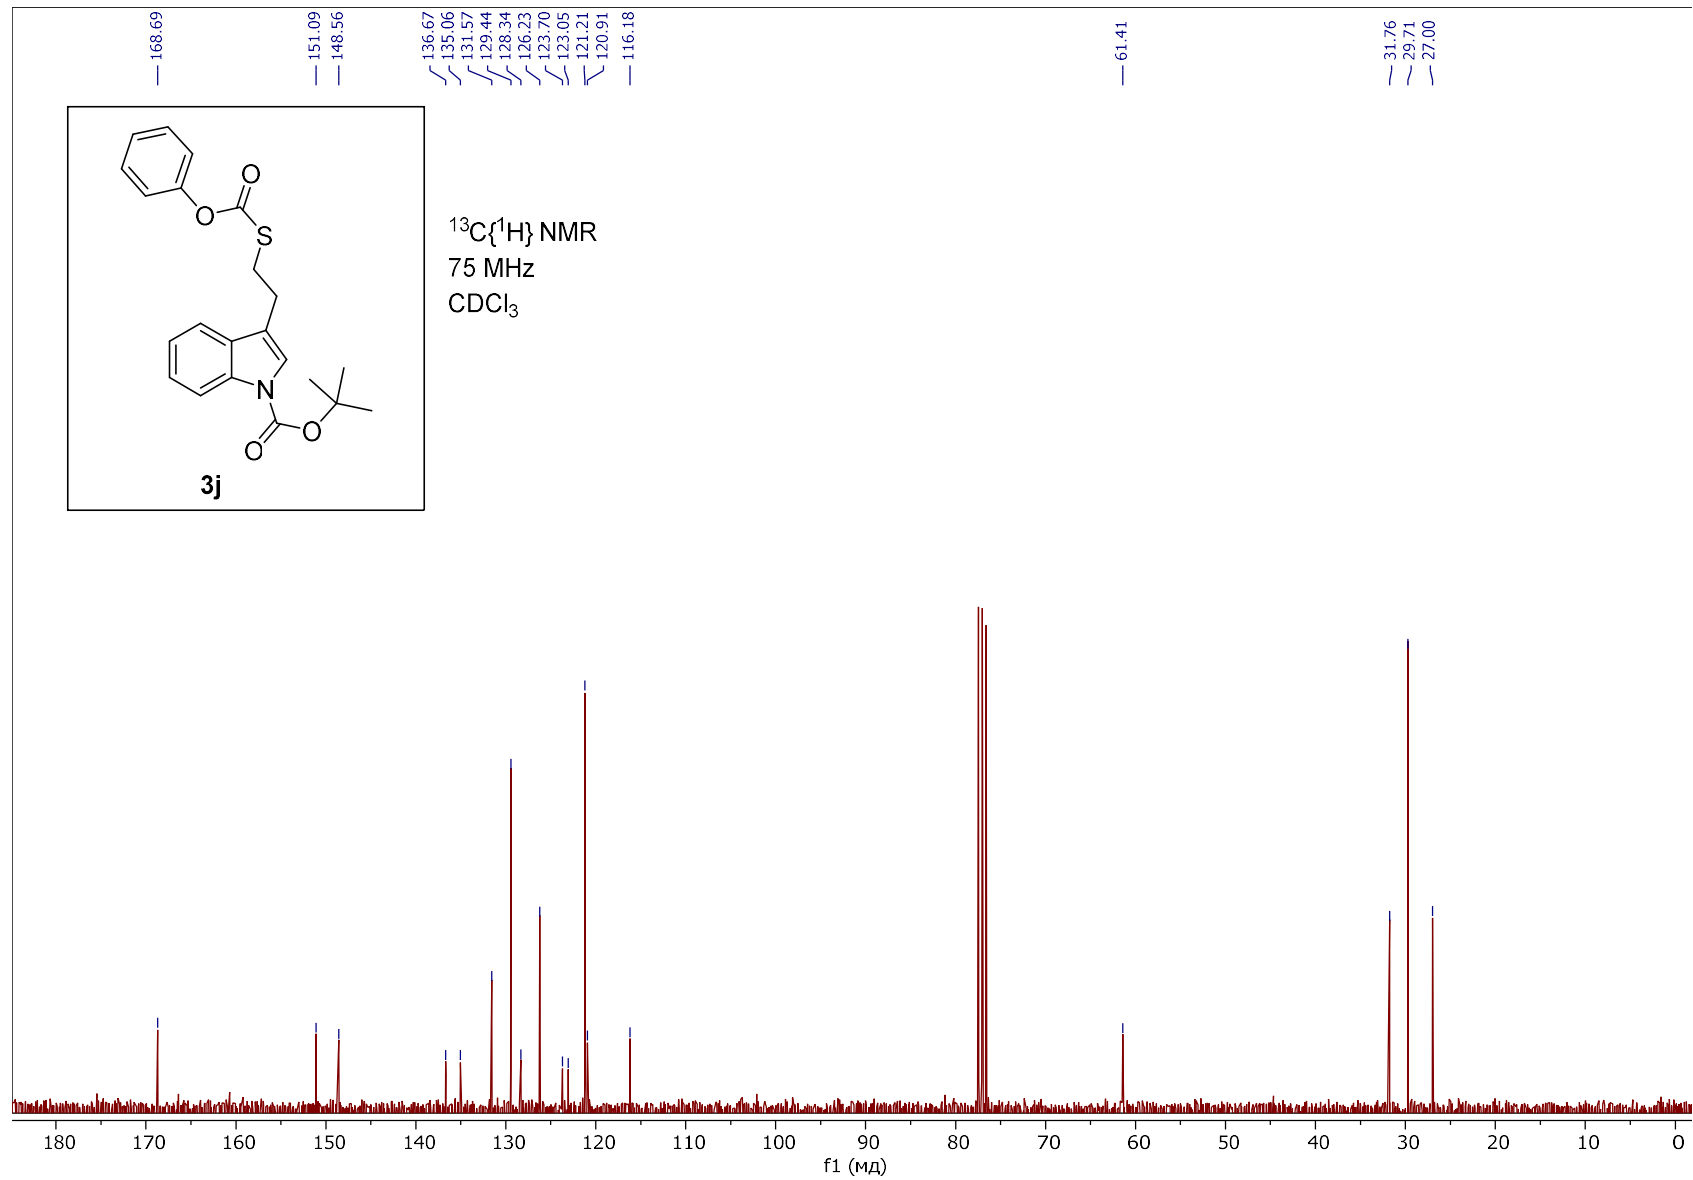

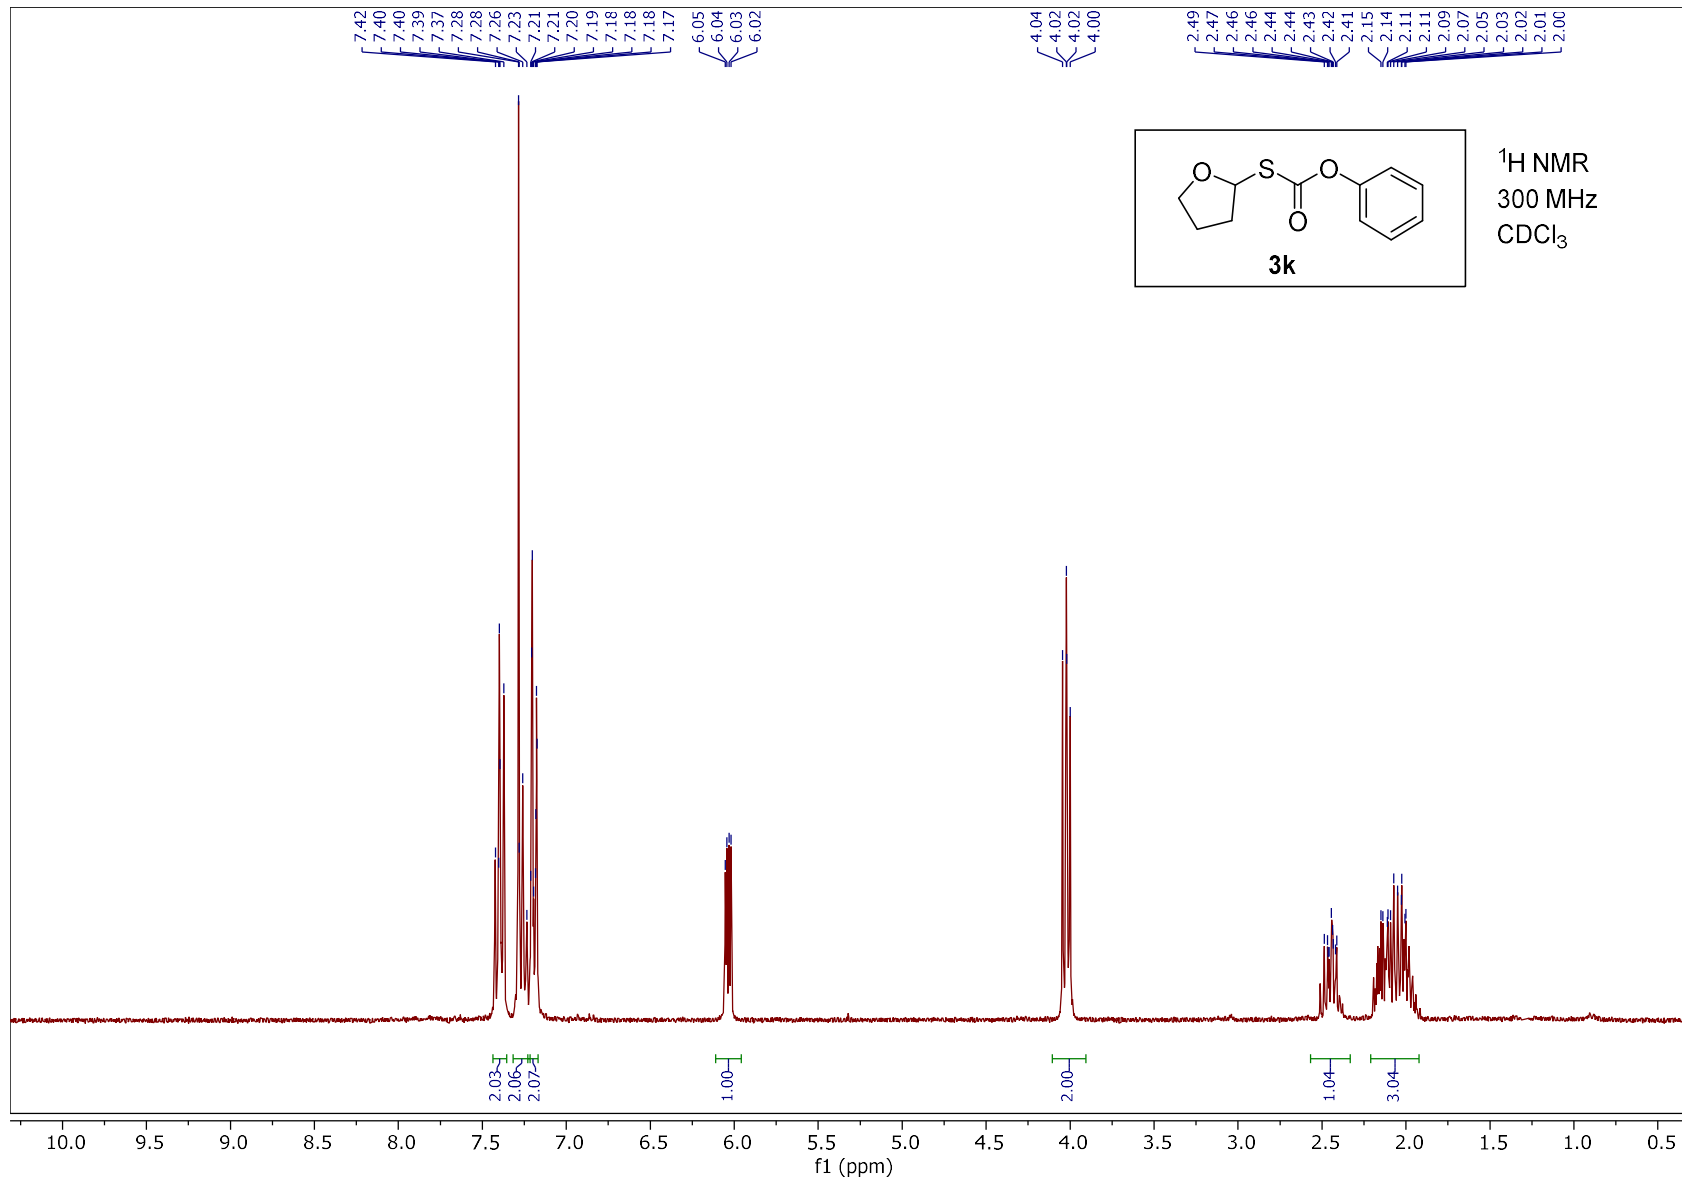



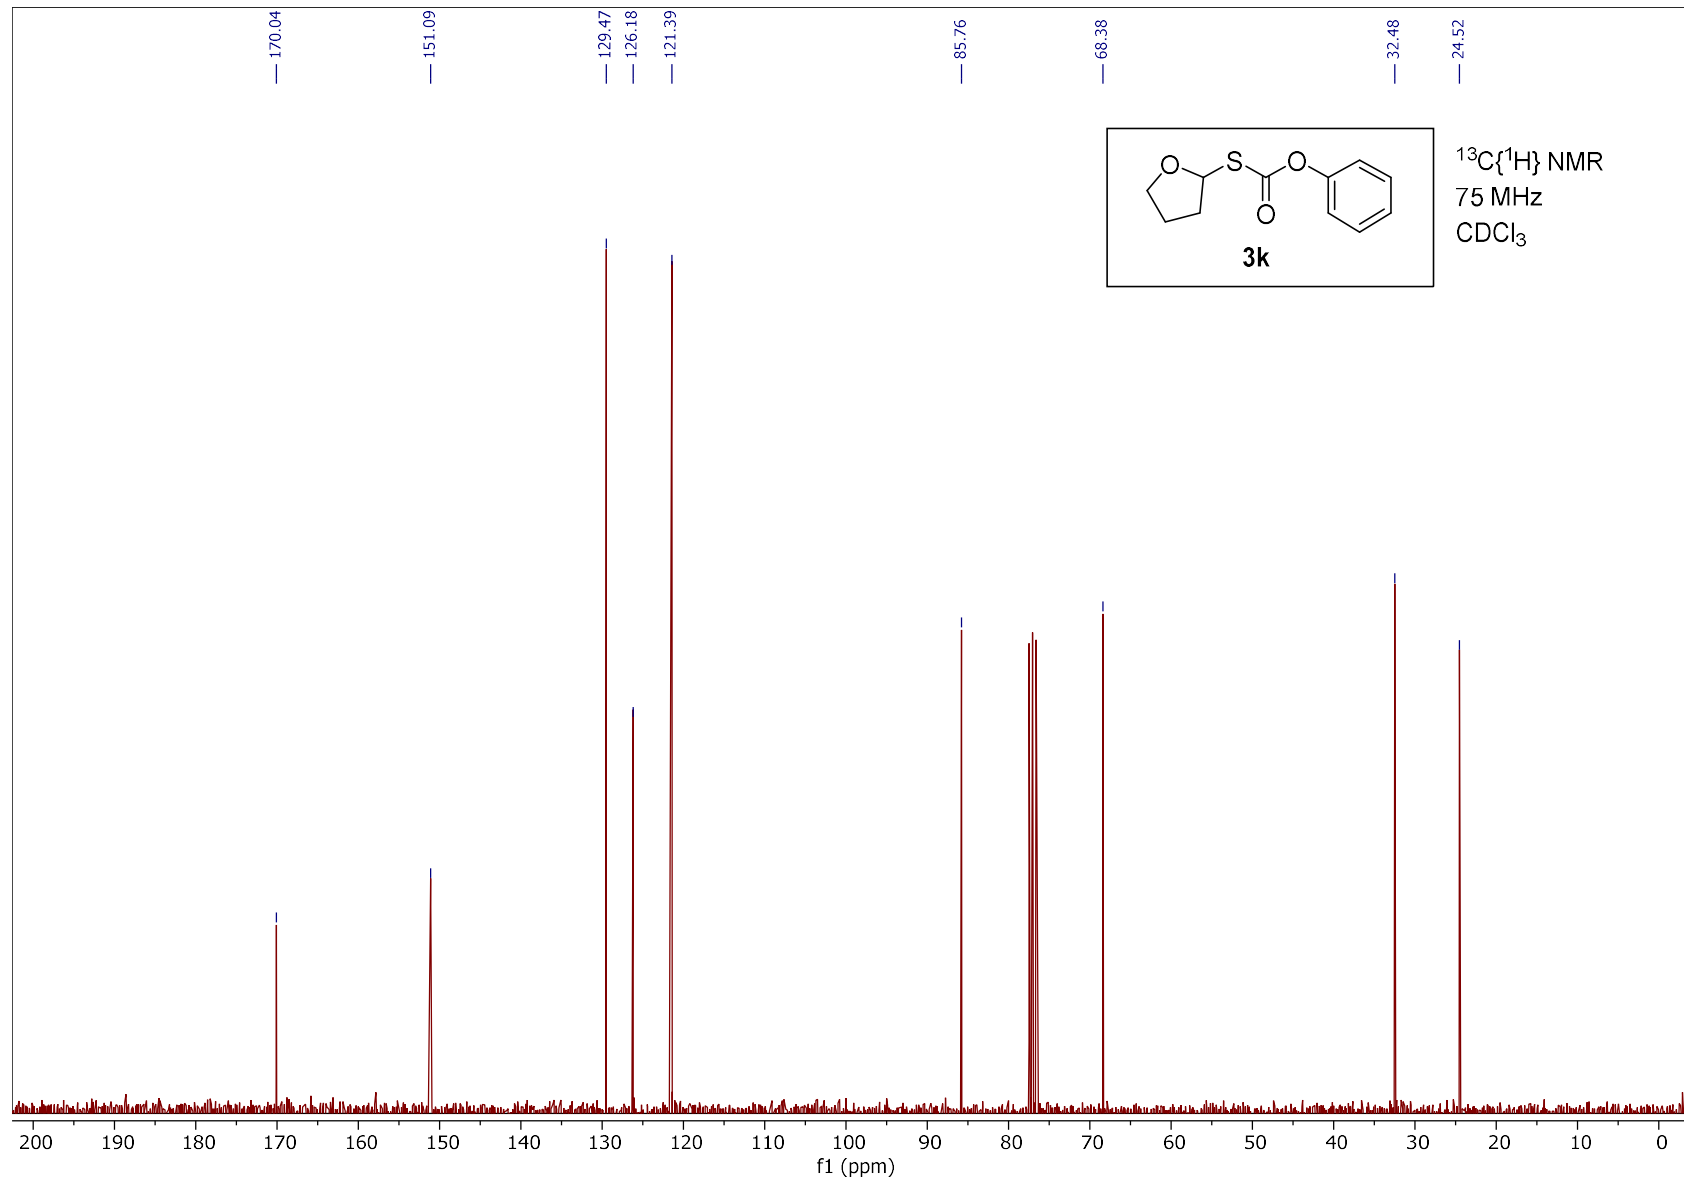

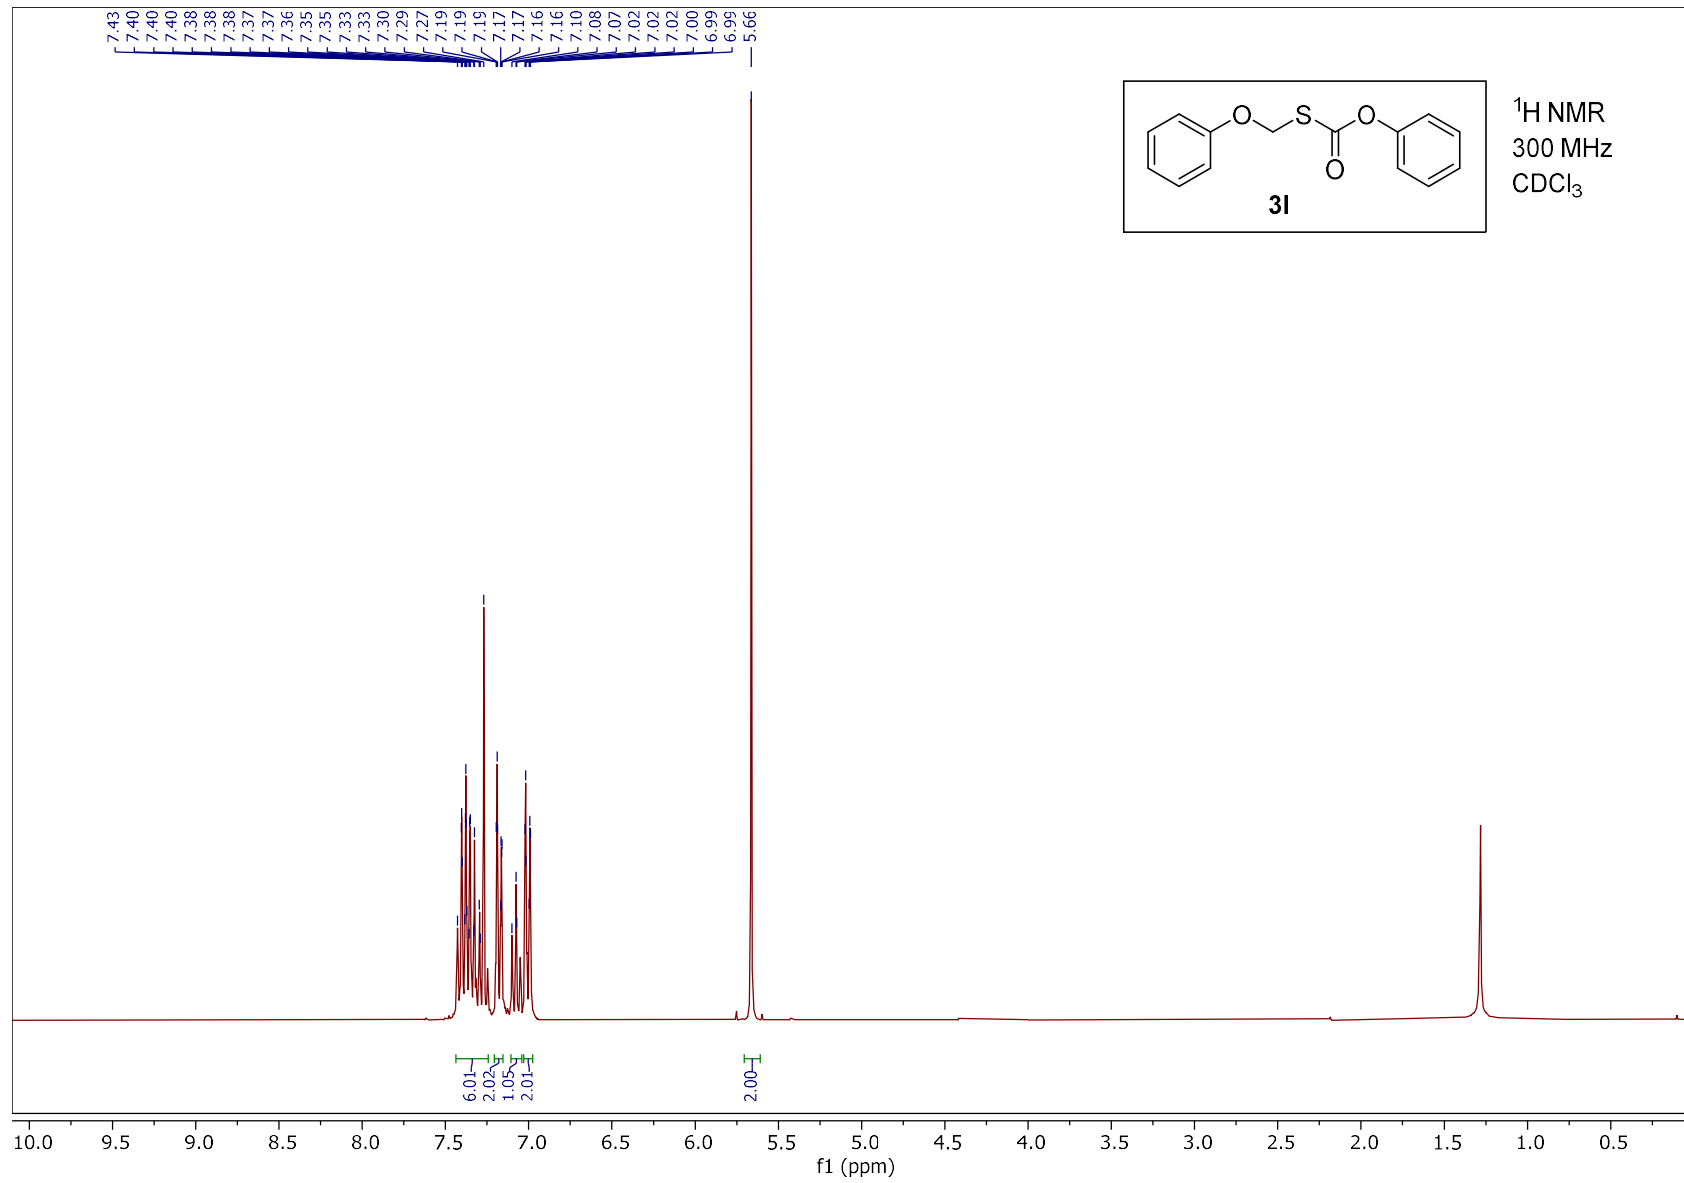

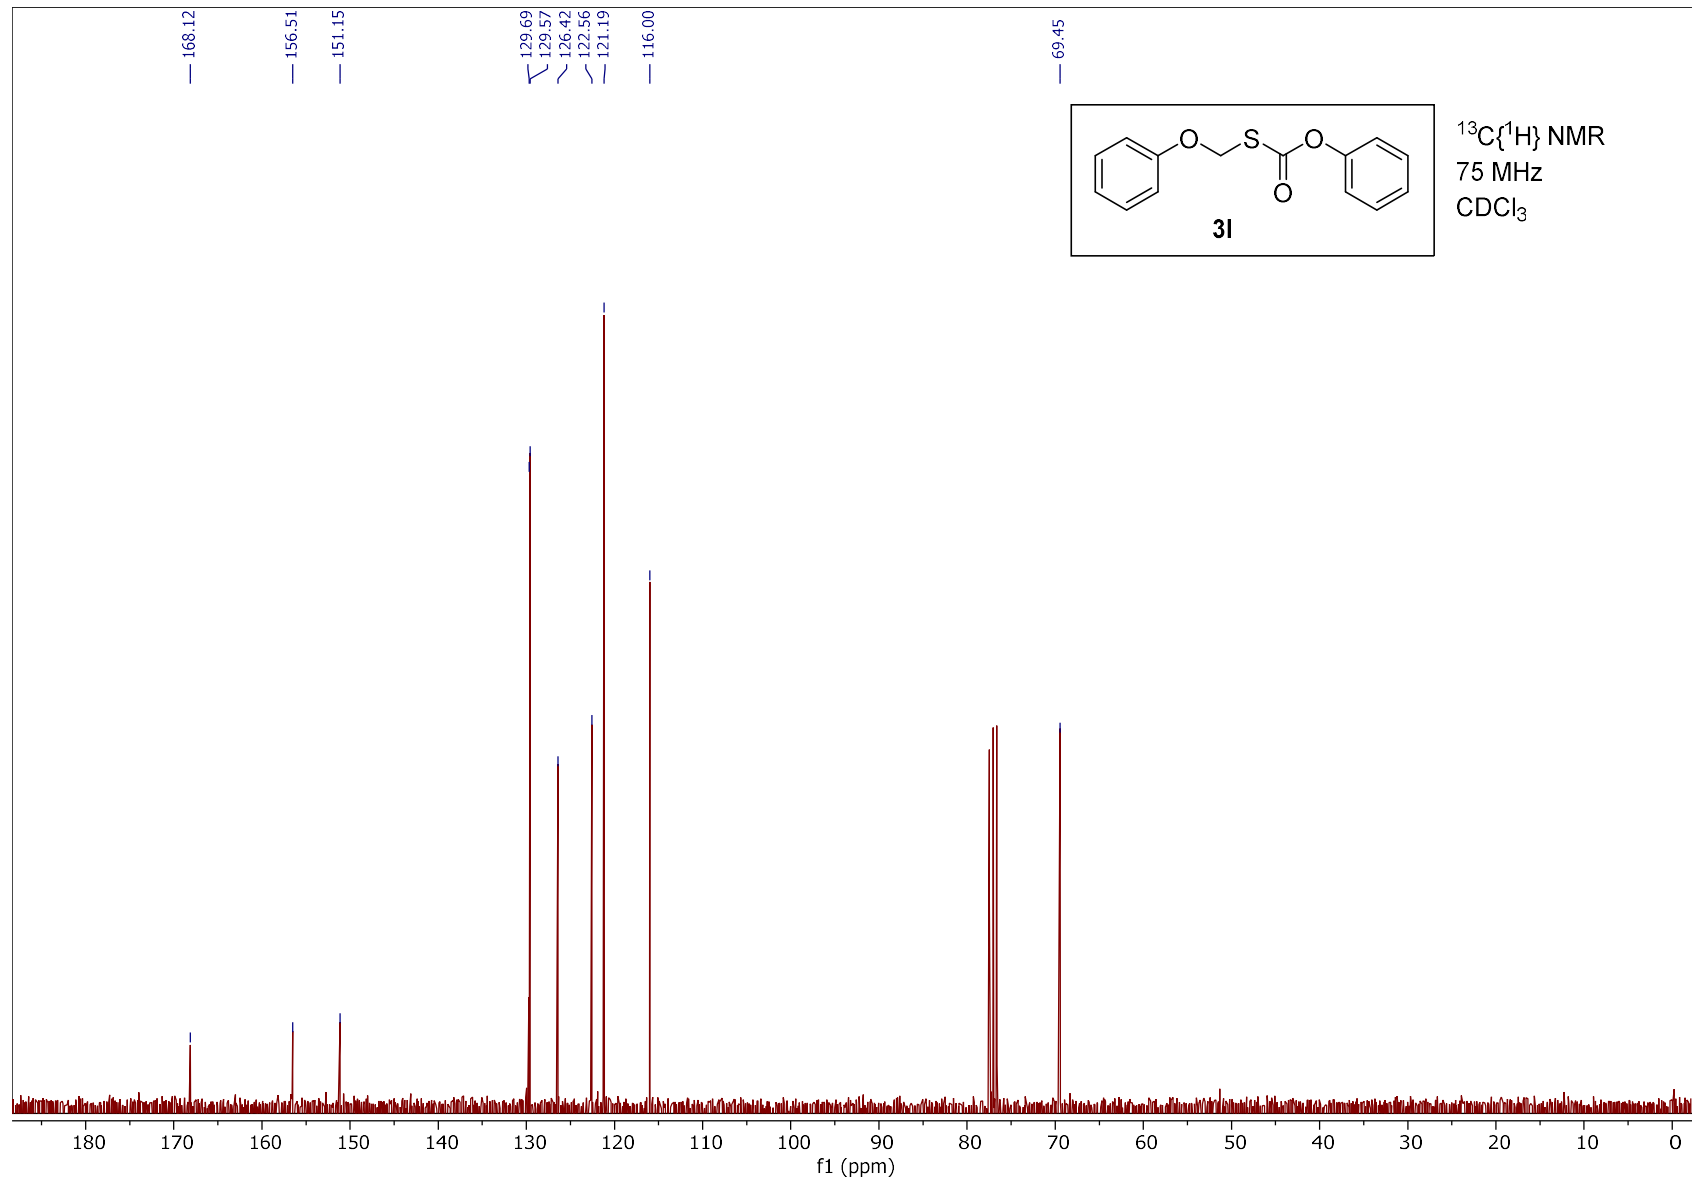

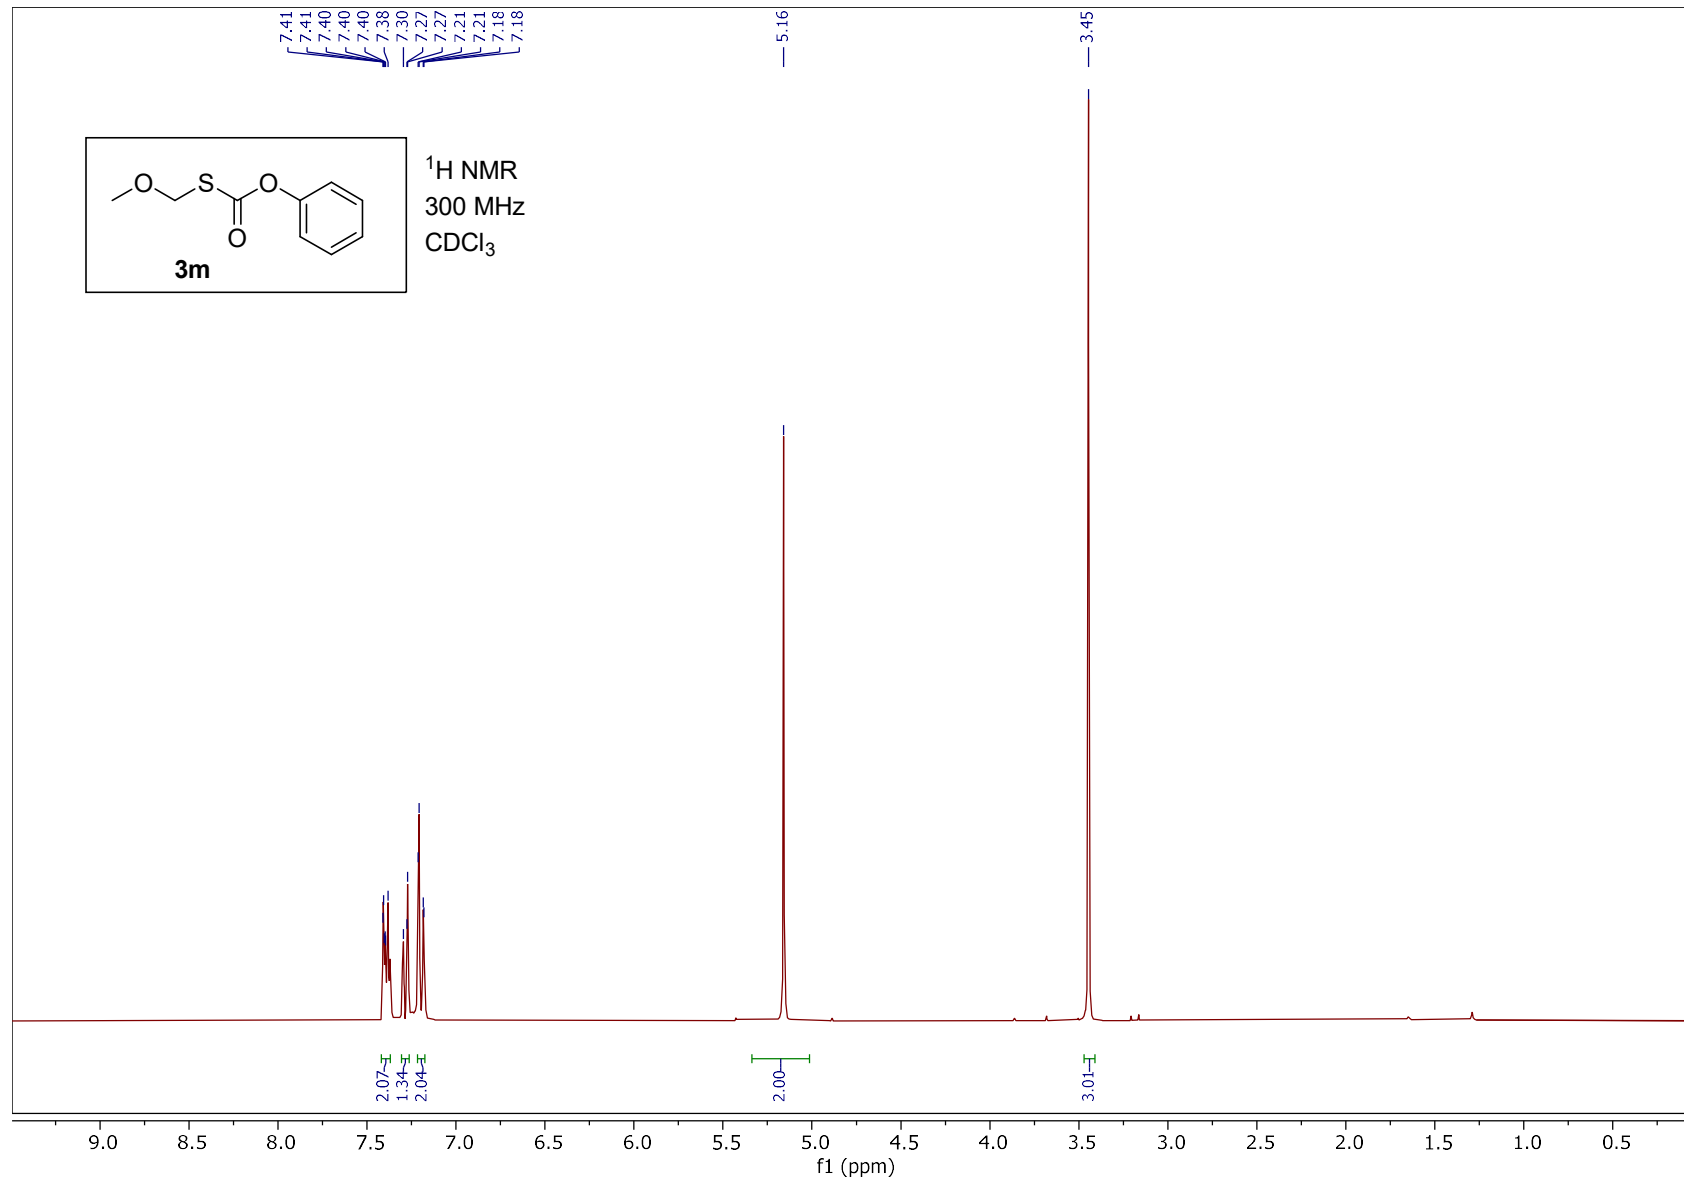

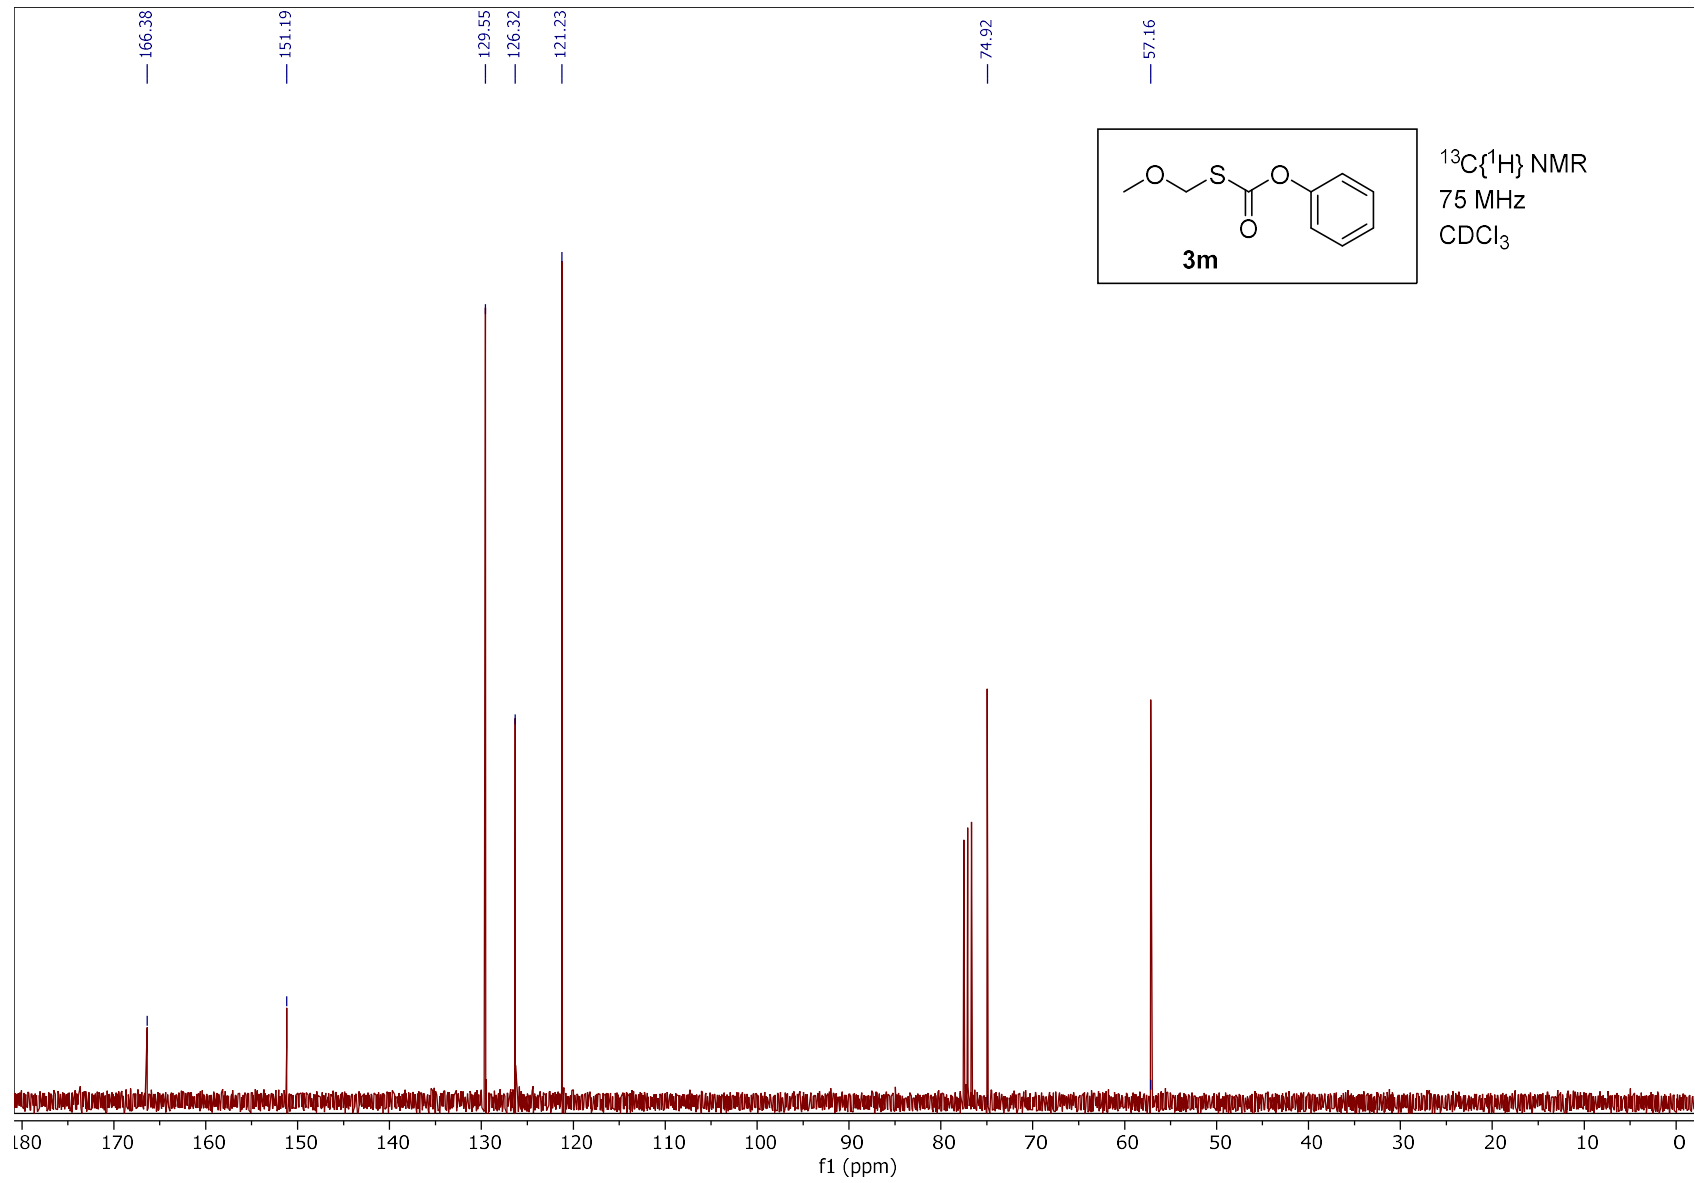

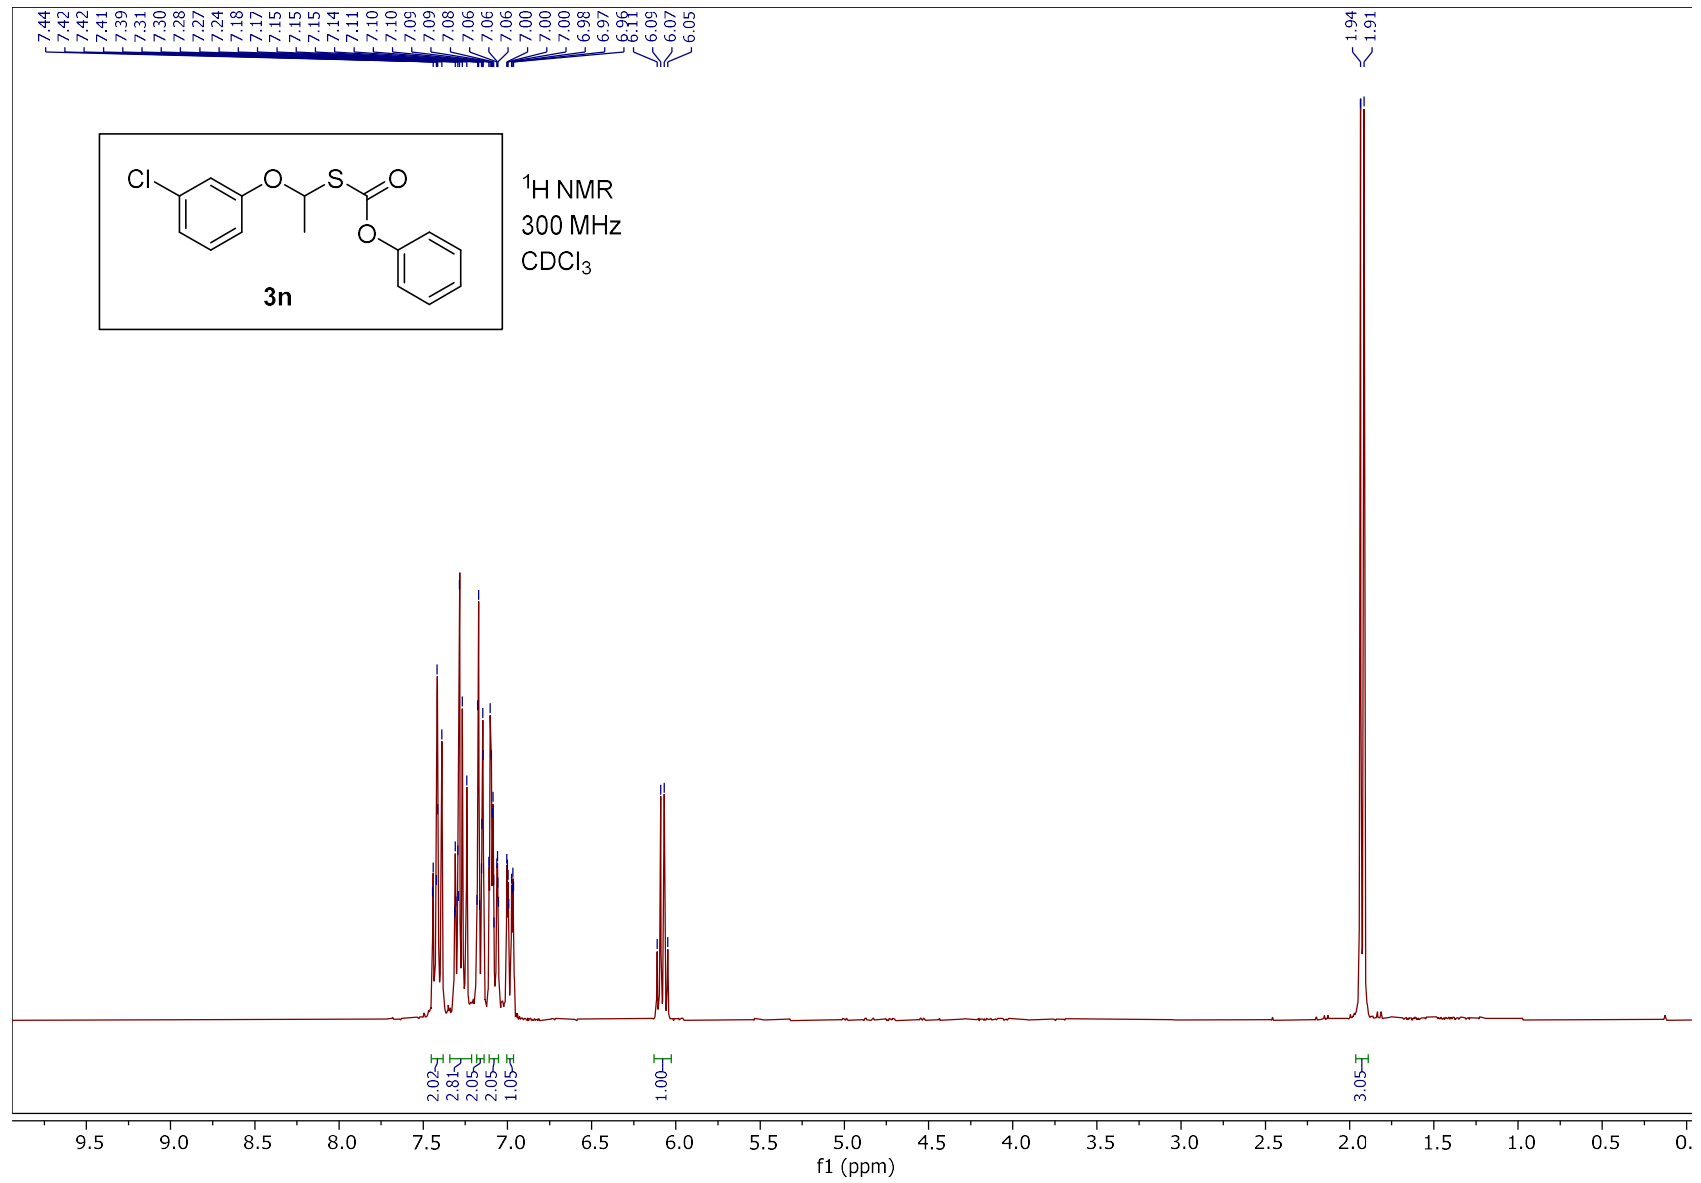

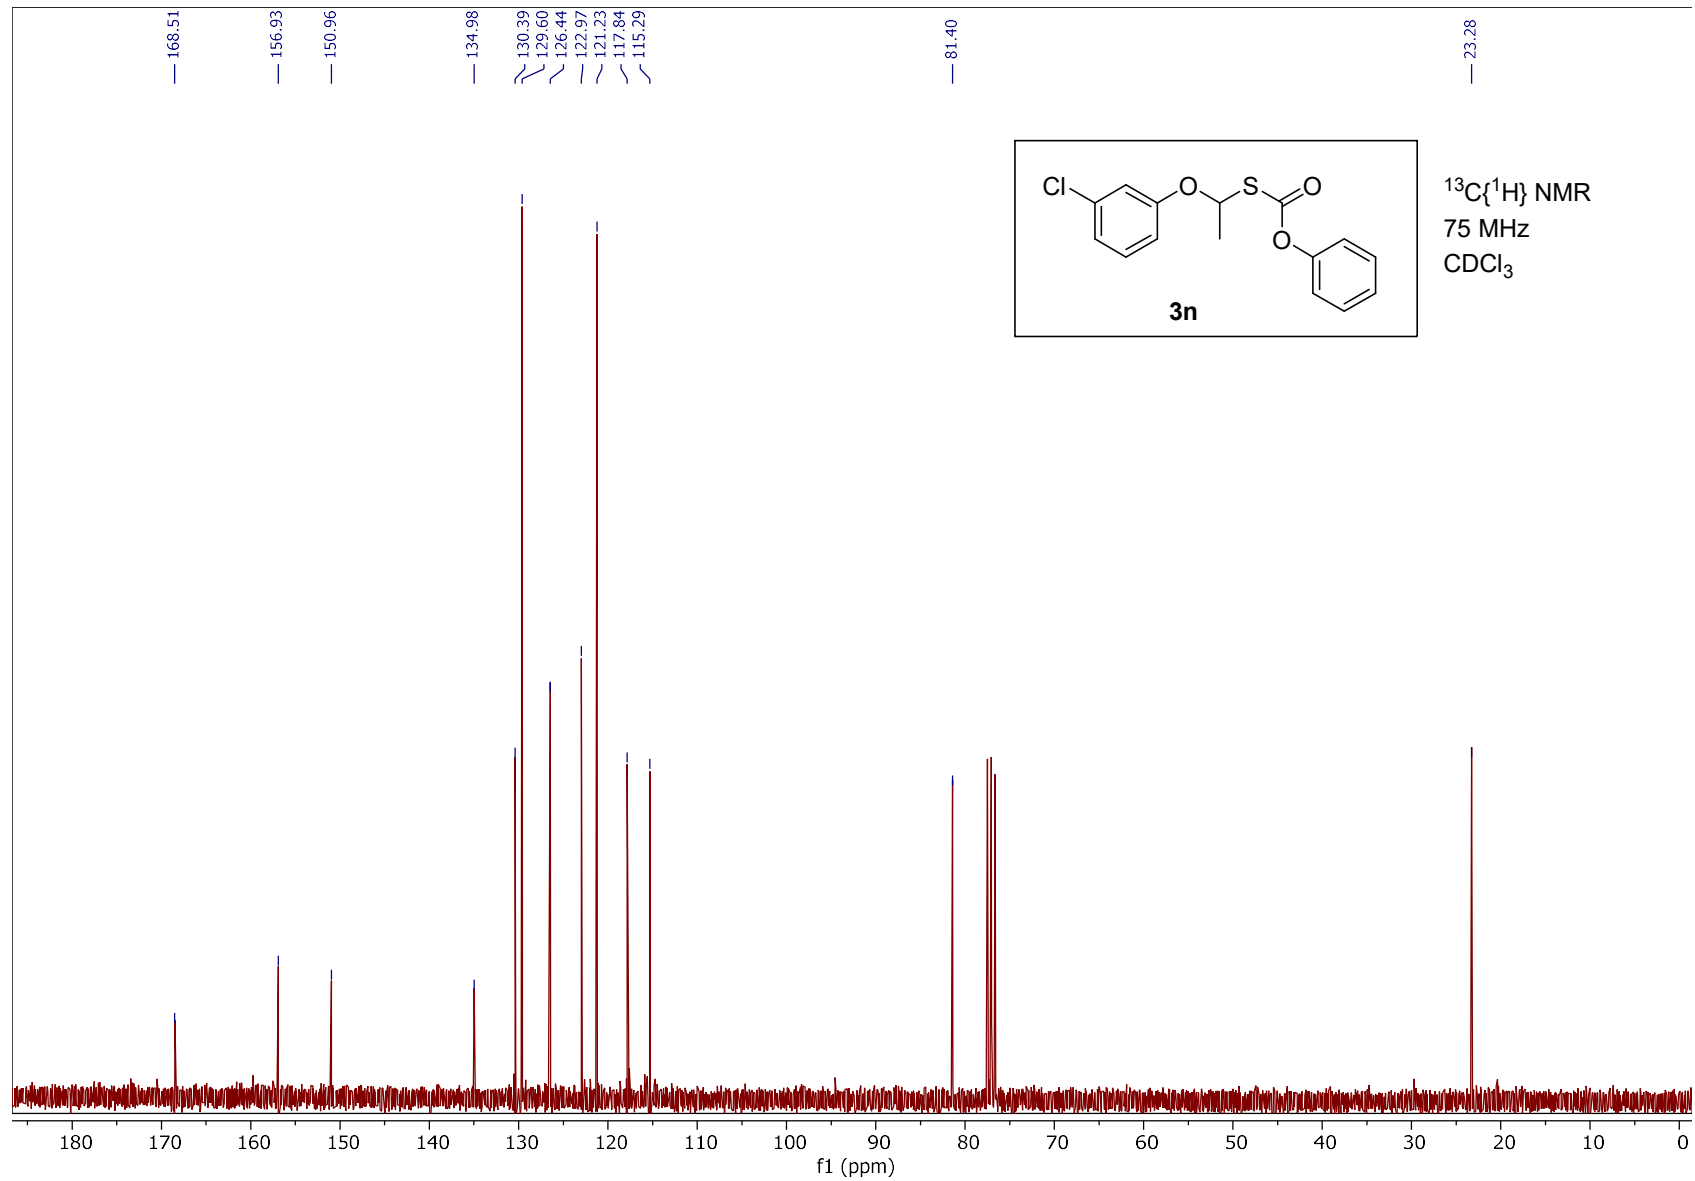

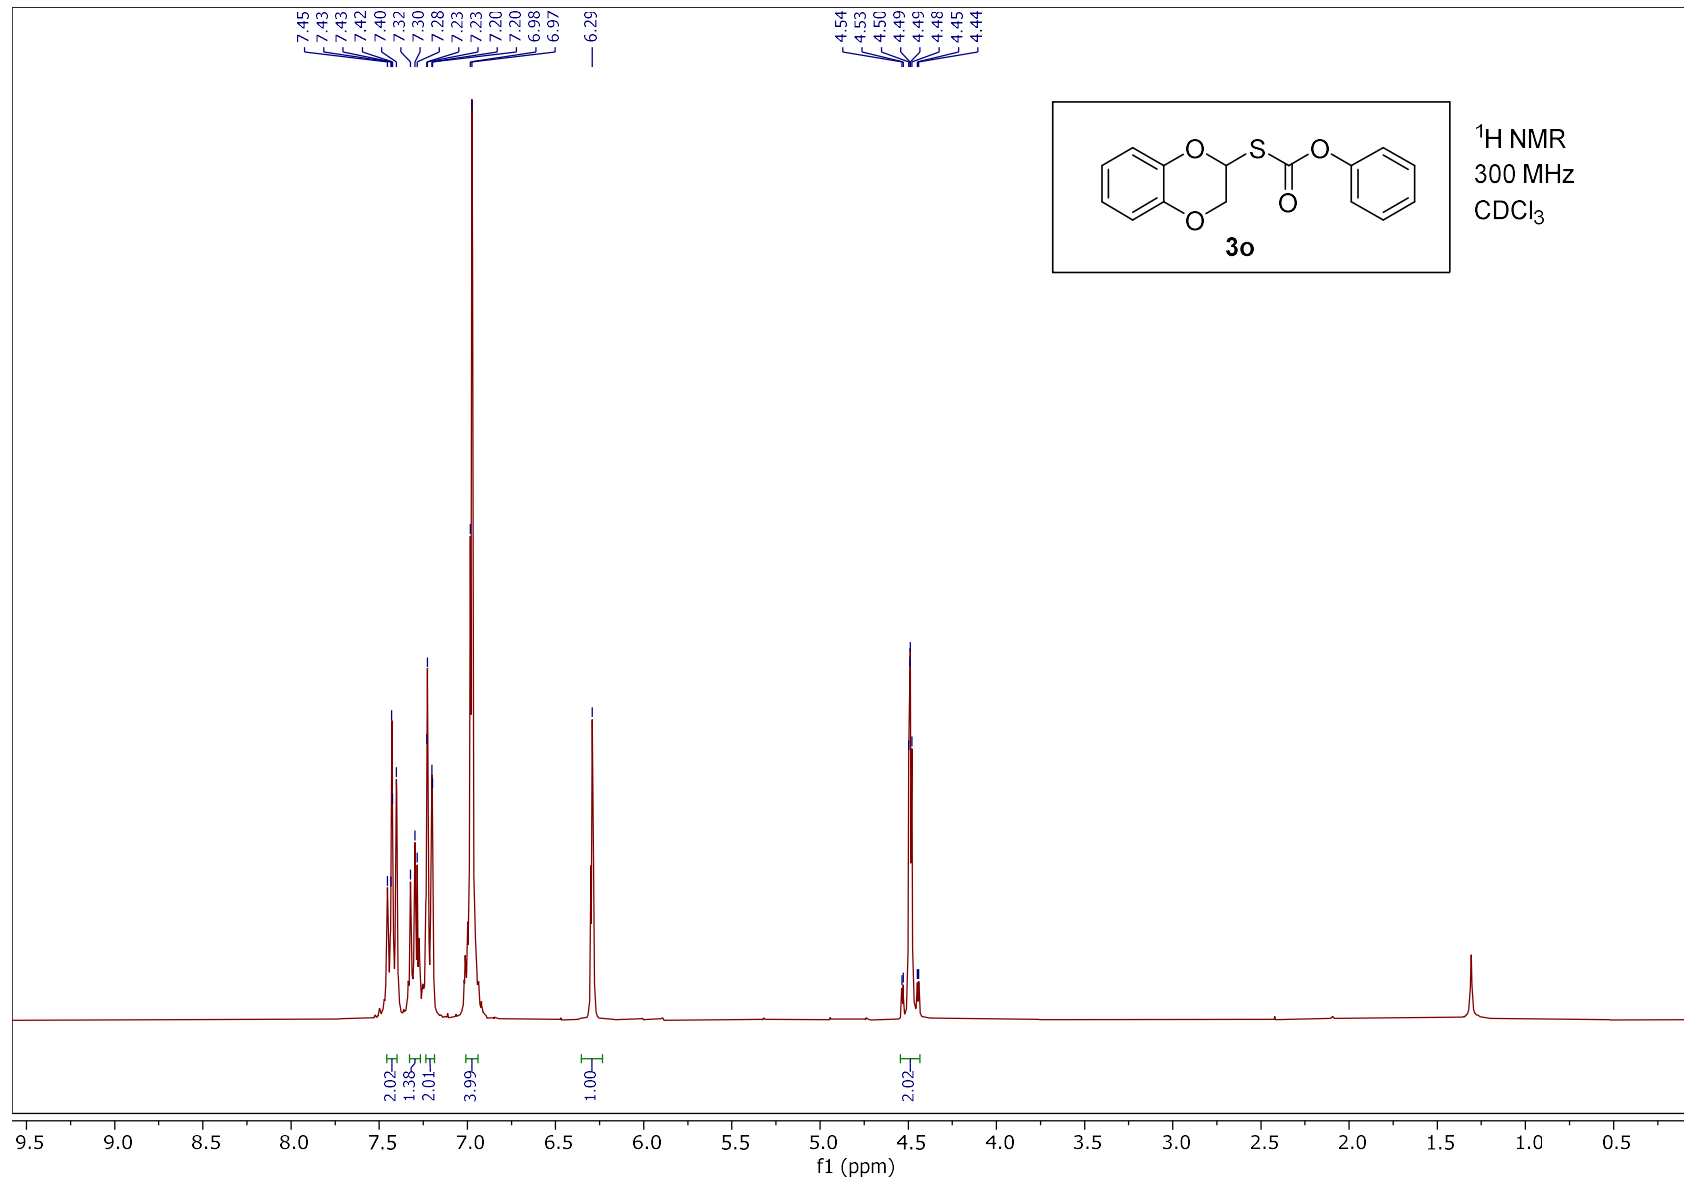



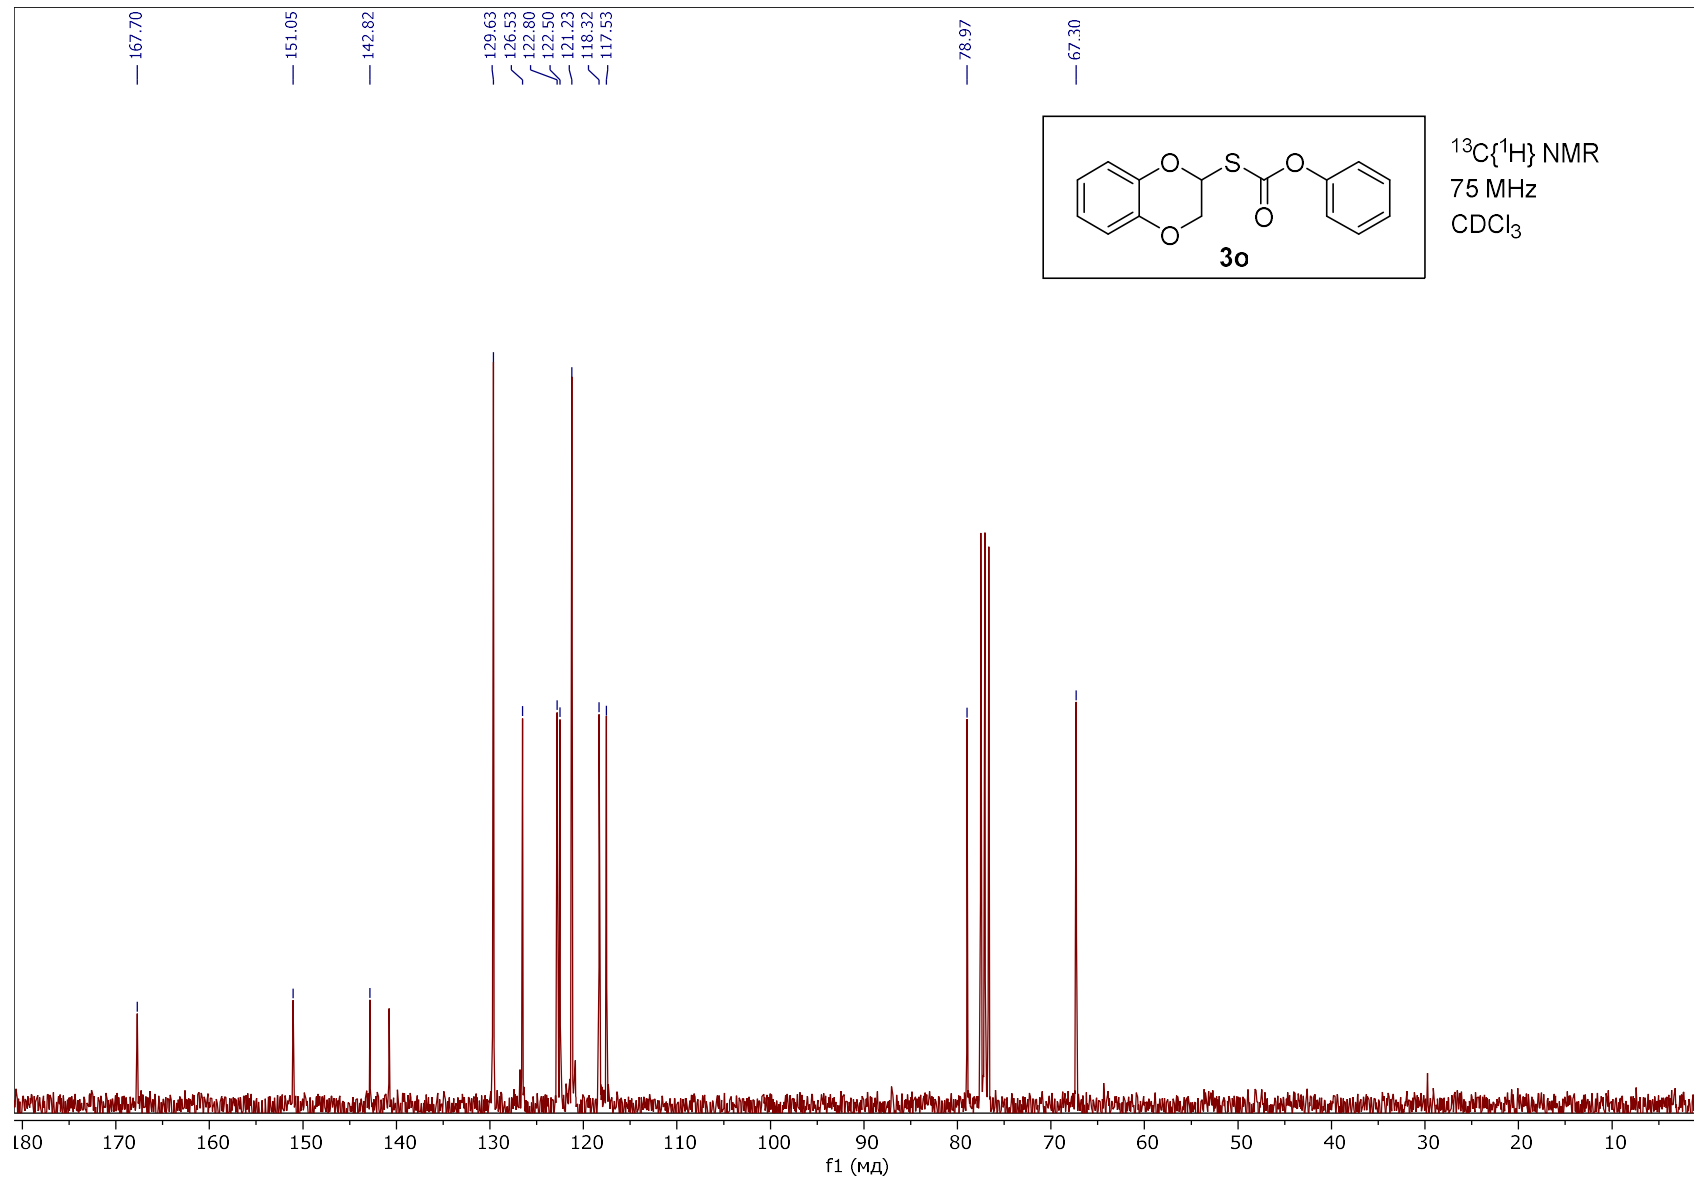

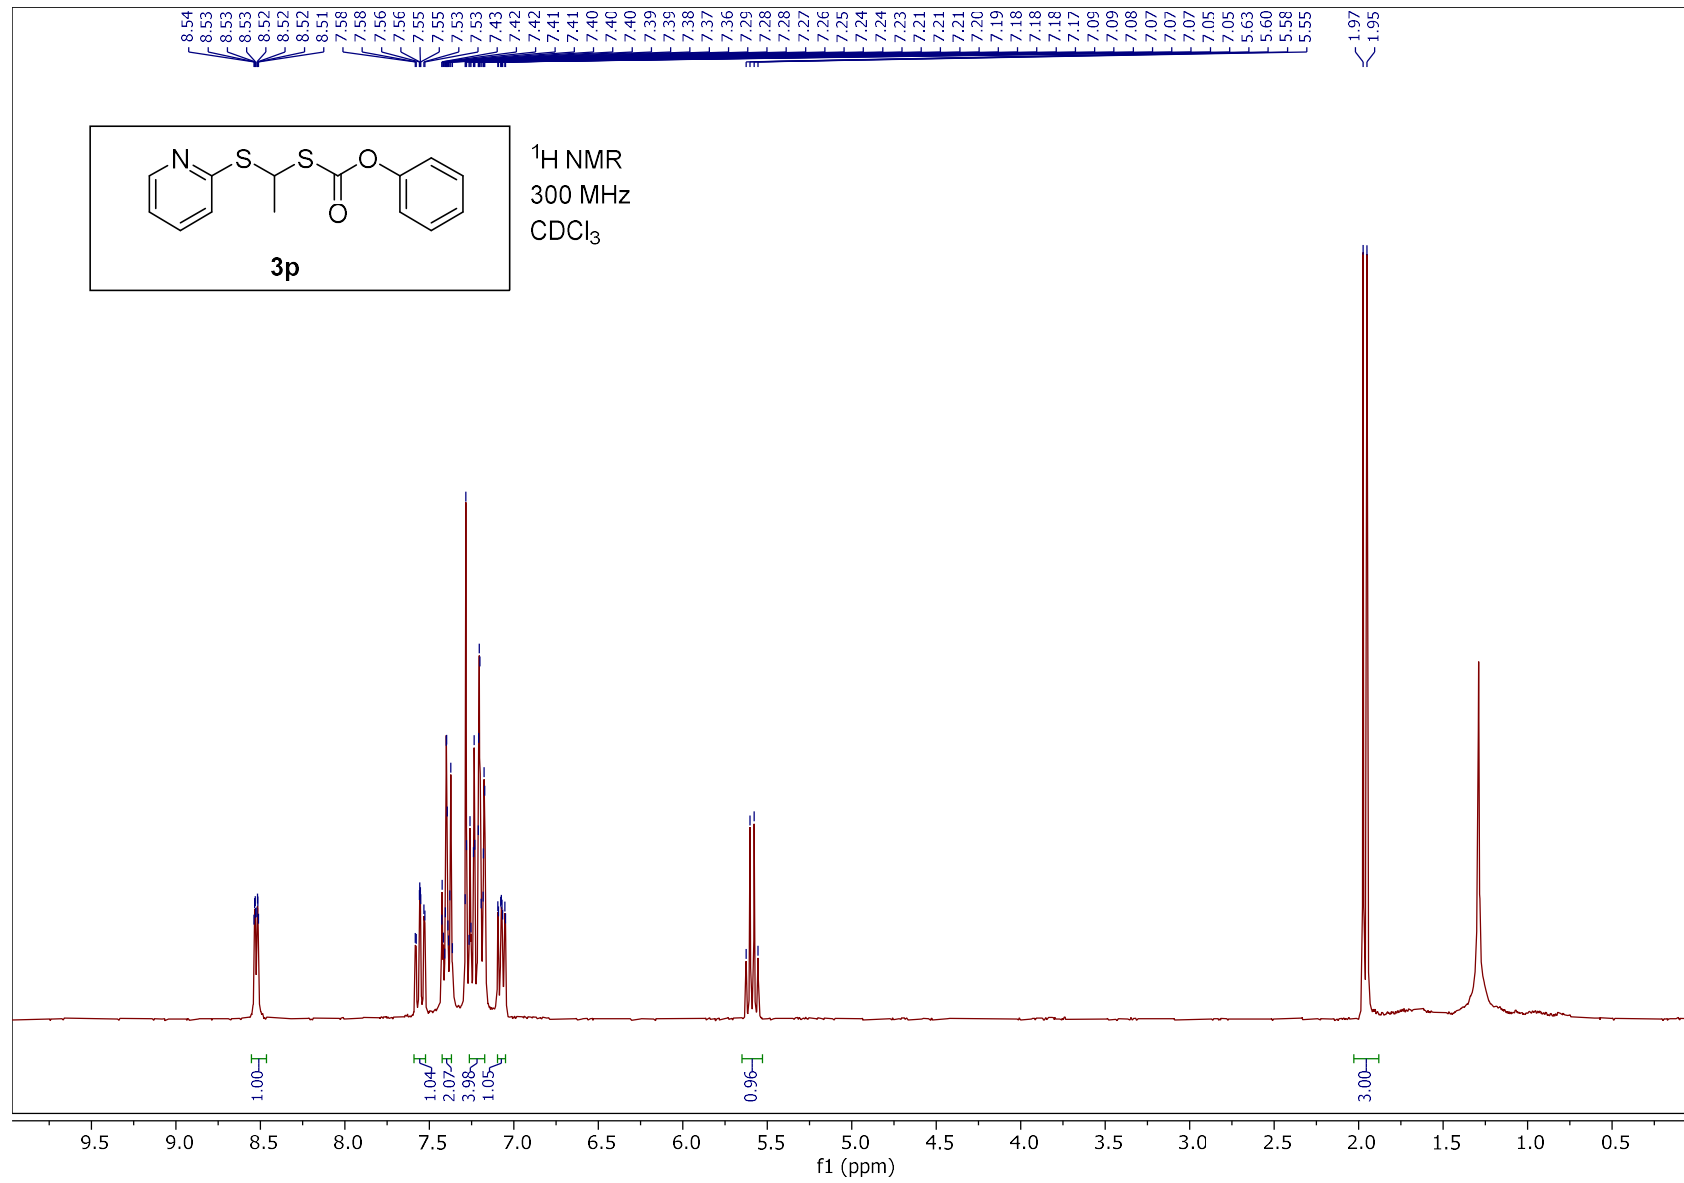

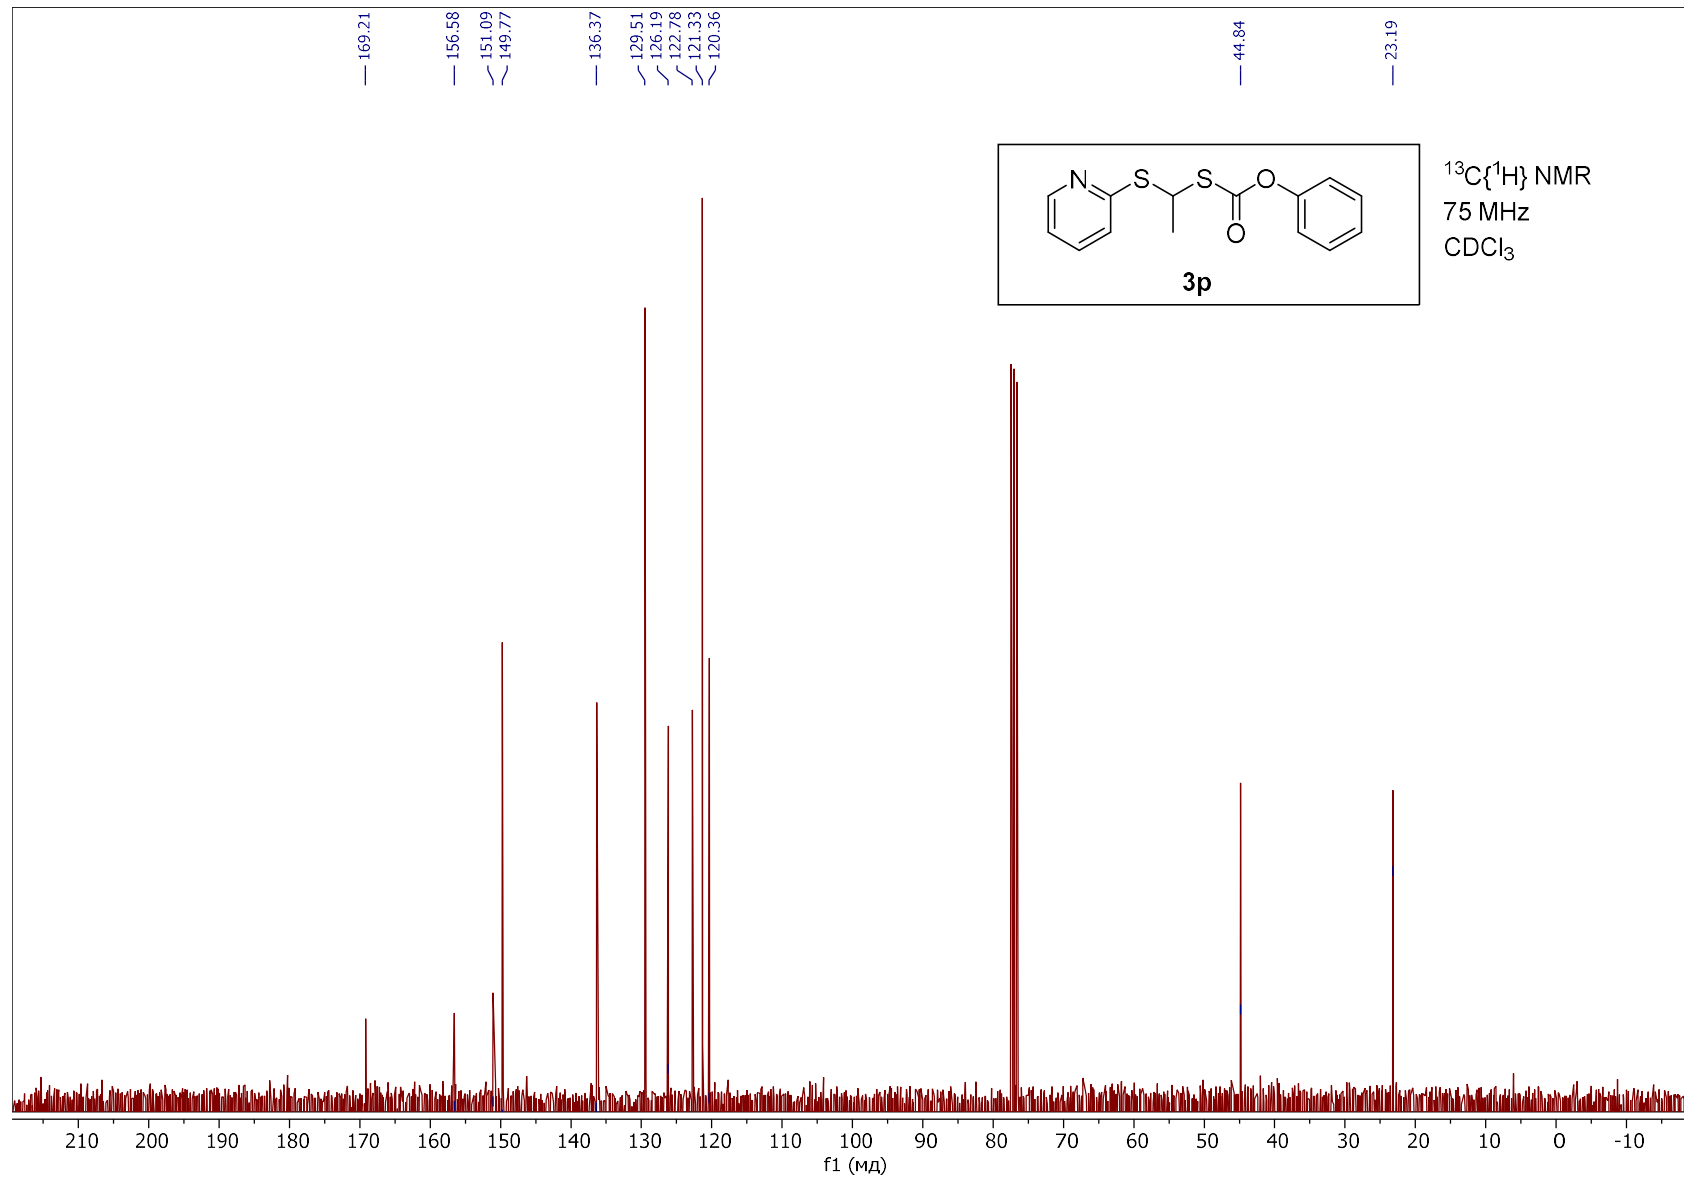

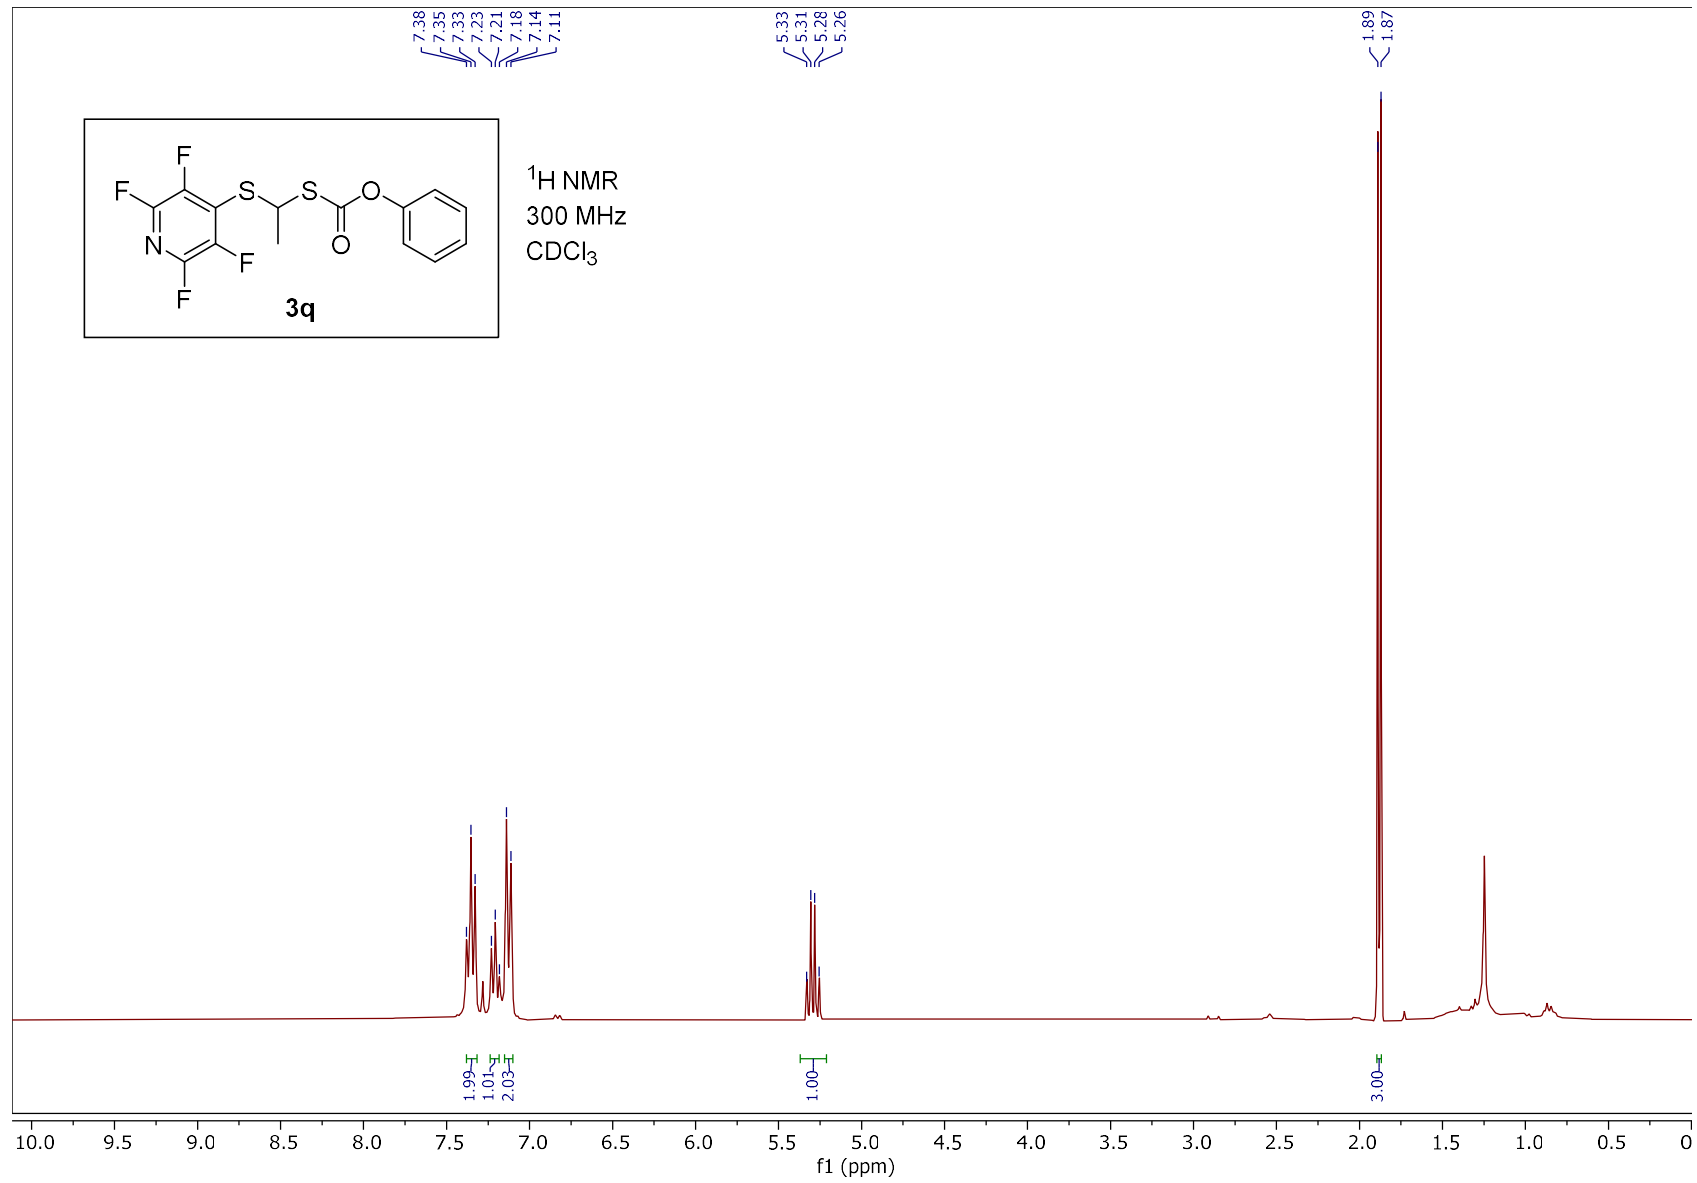

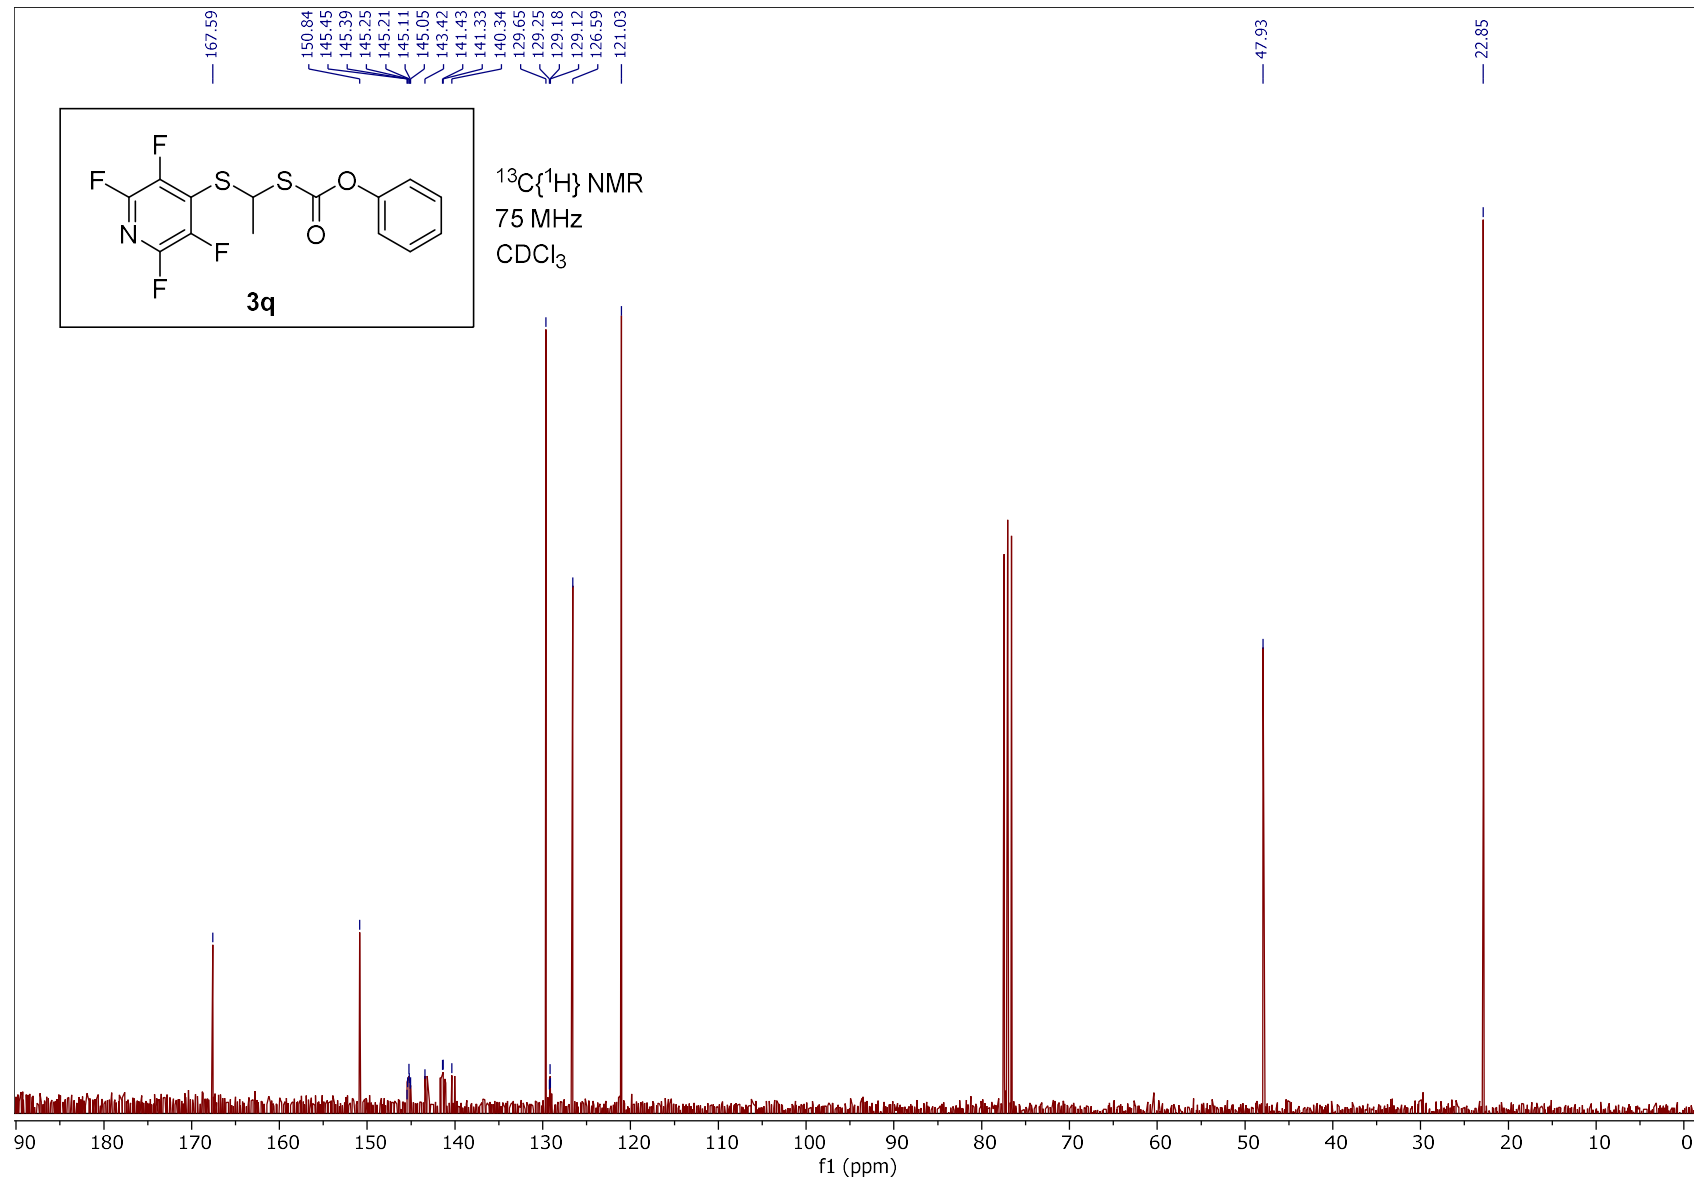

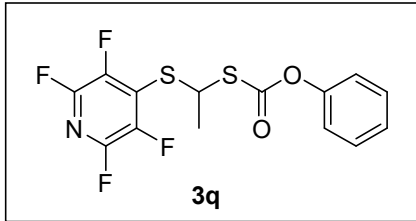

<sup>19</sup>F NMR  
272 MHz  
CDCl<sub>3</sub>

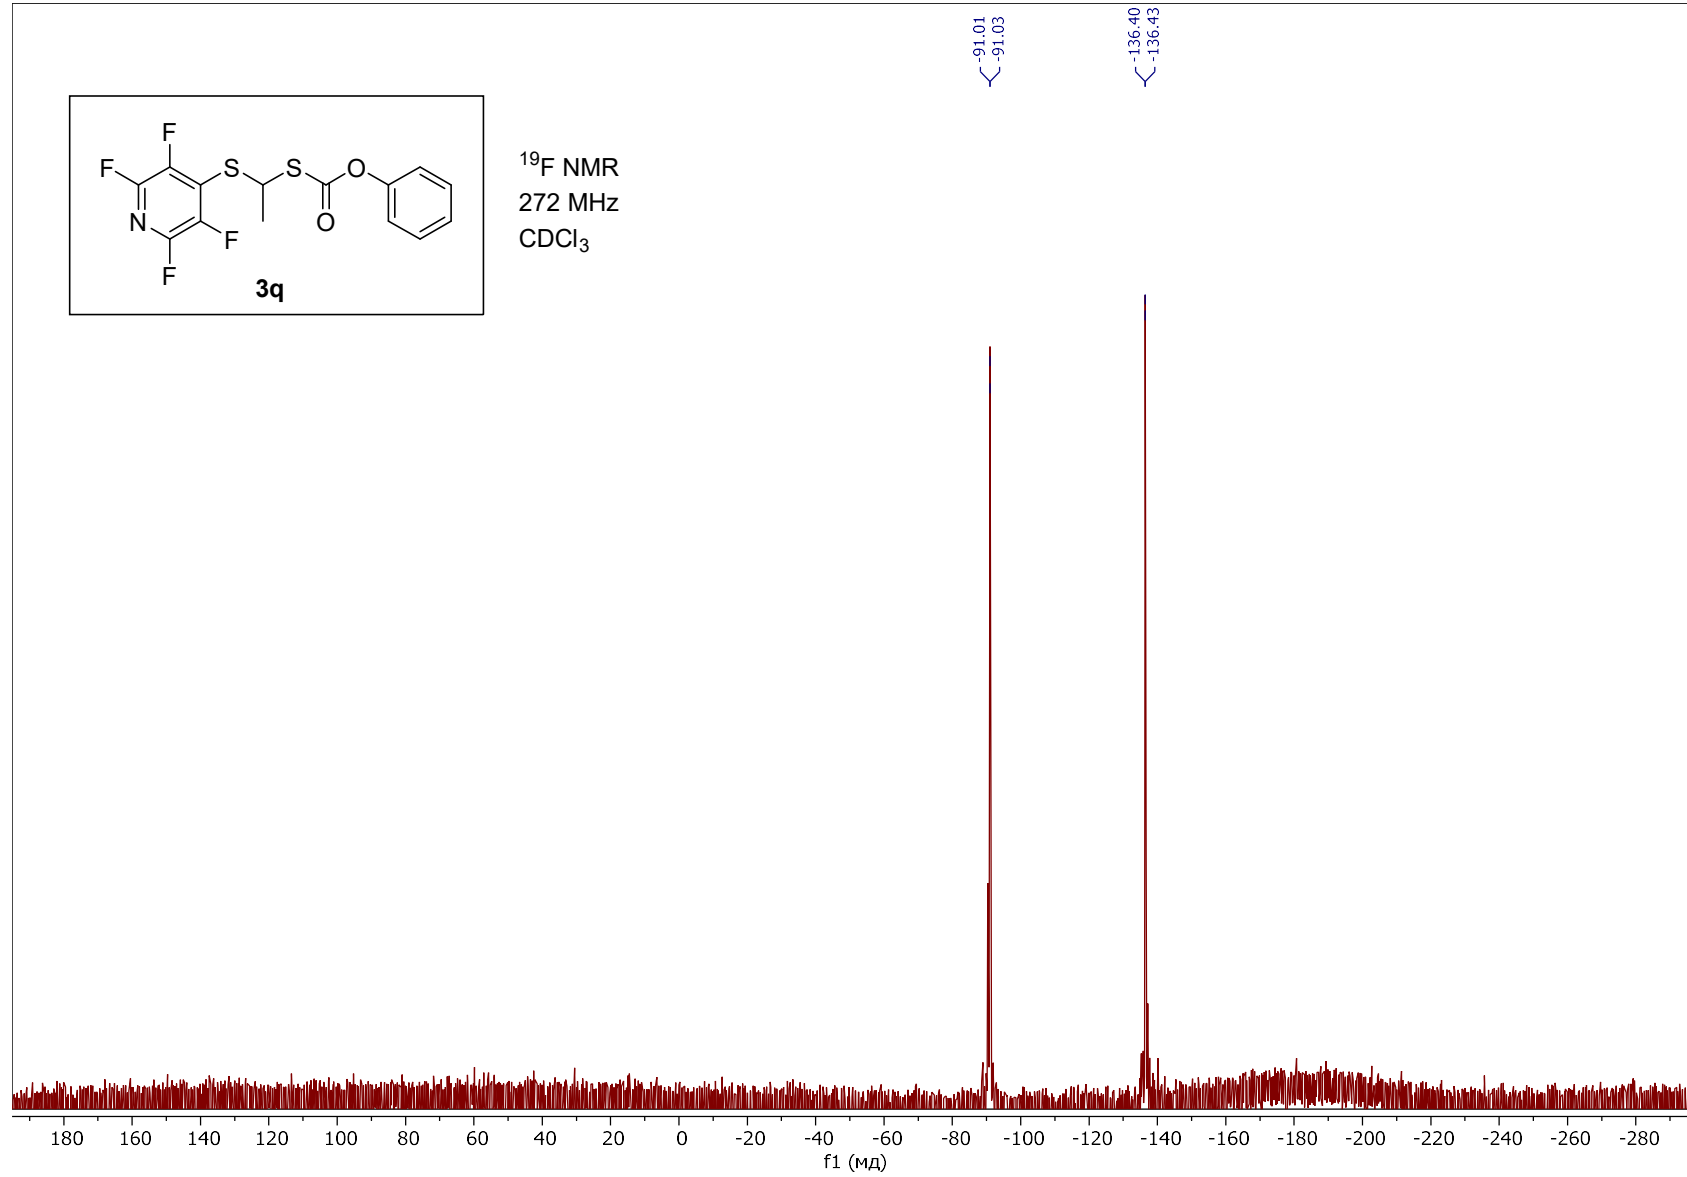

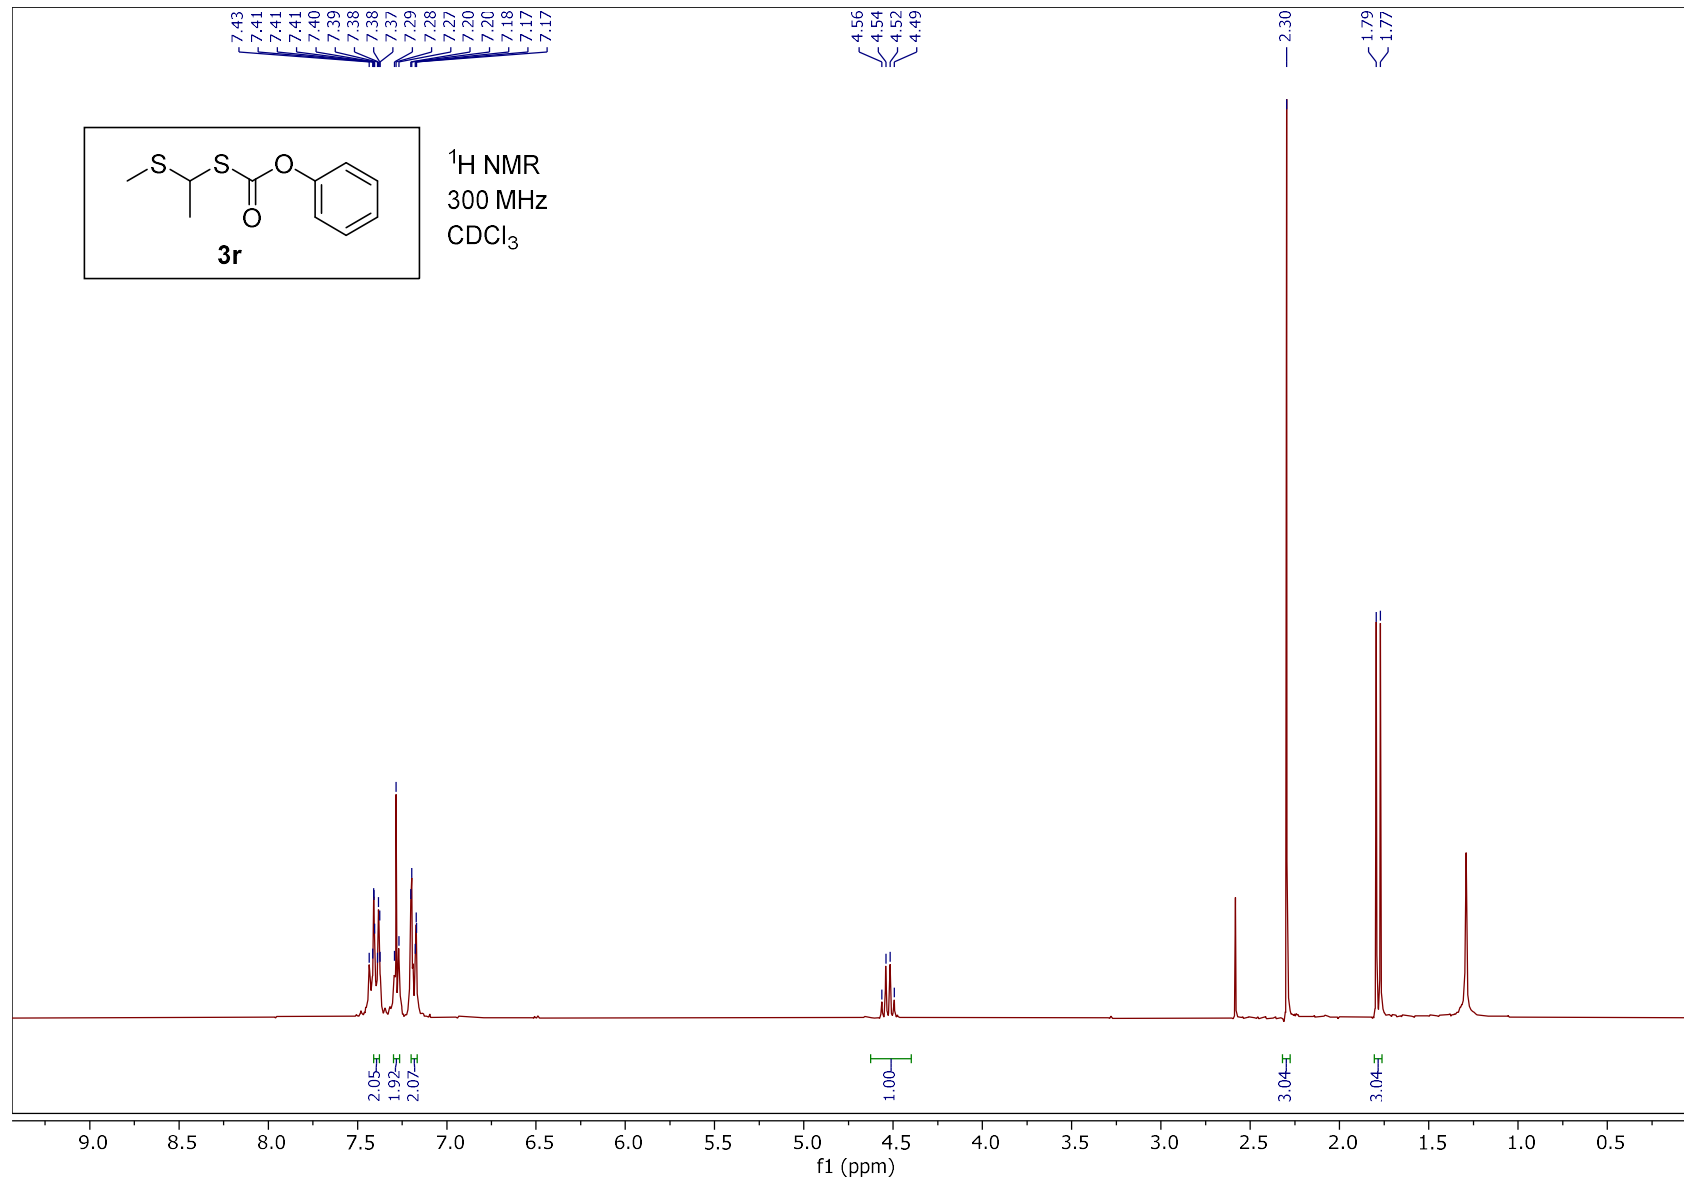

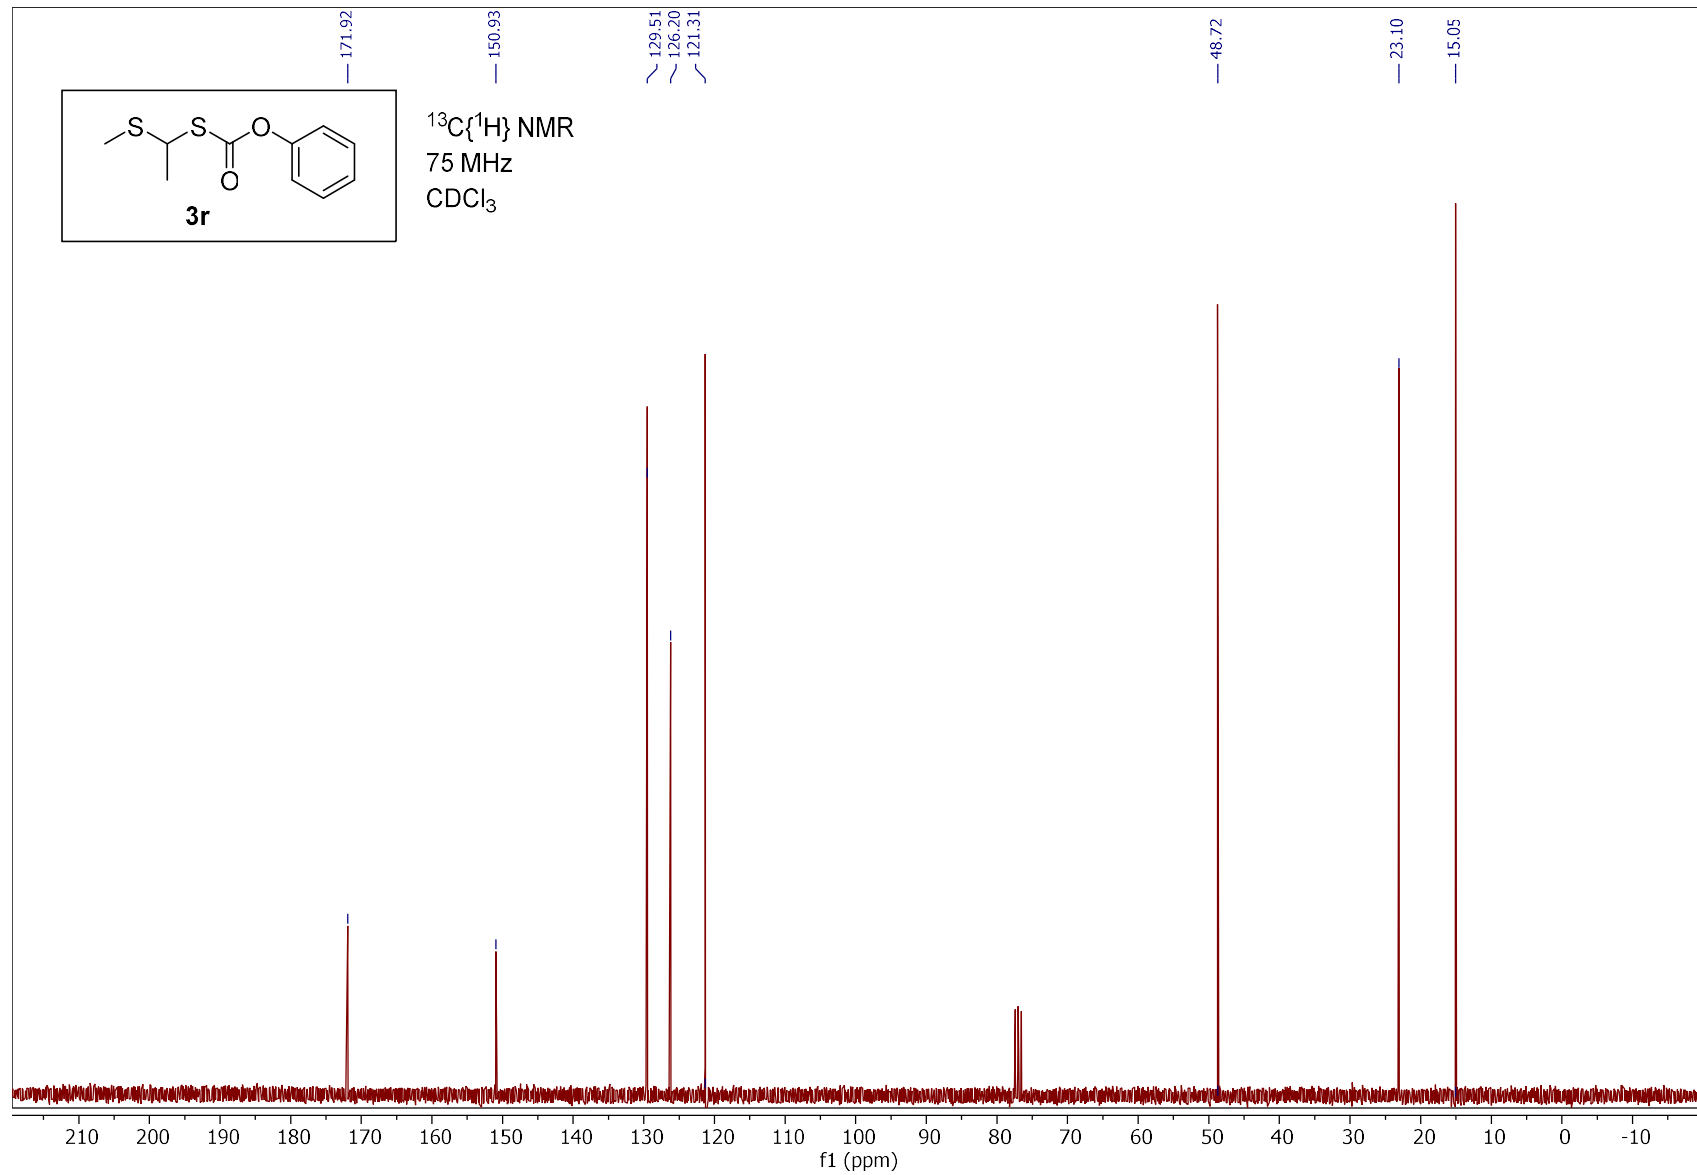



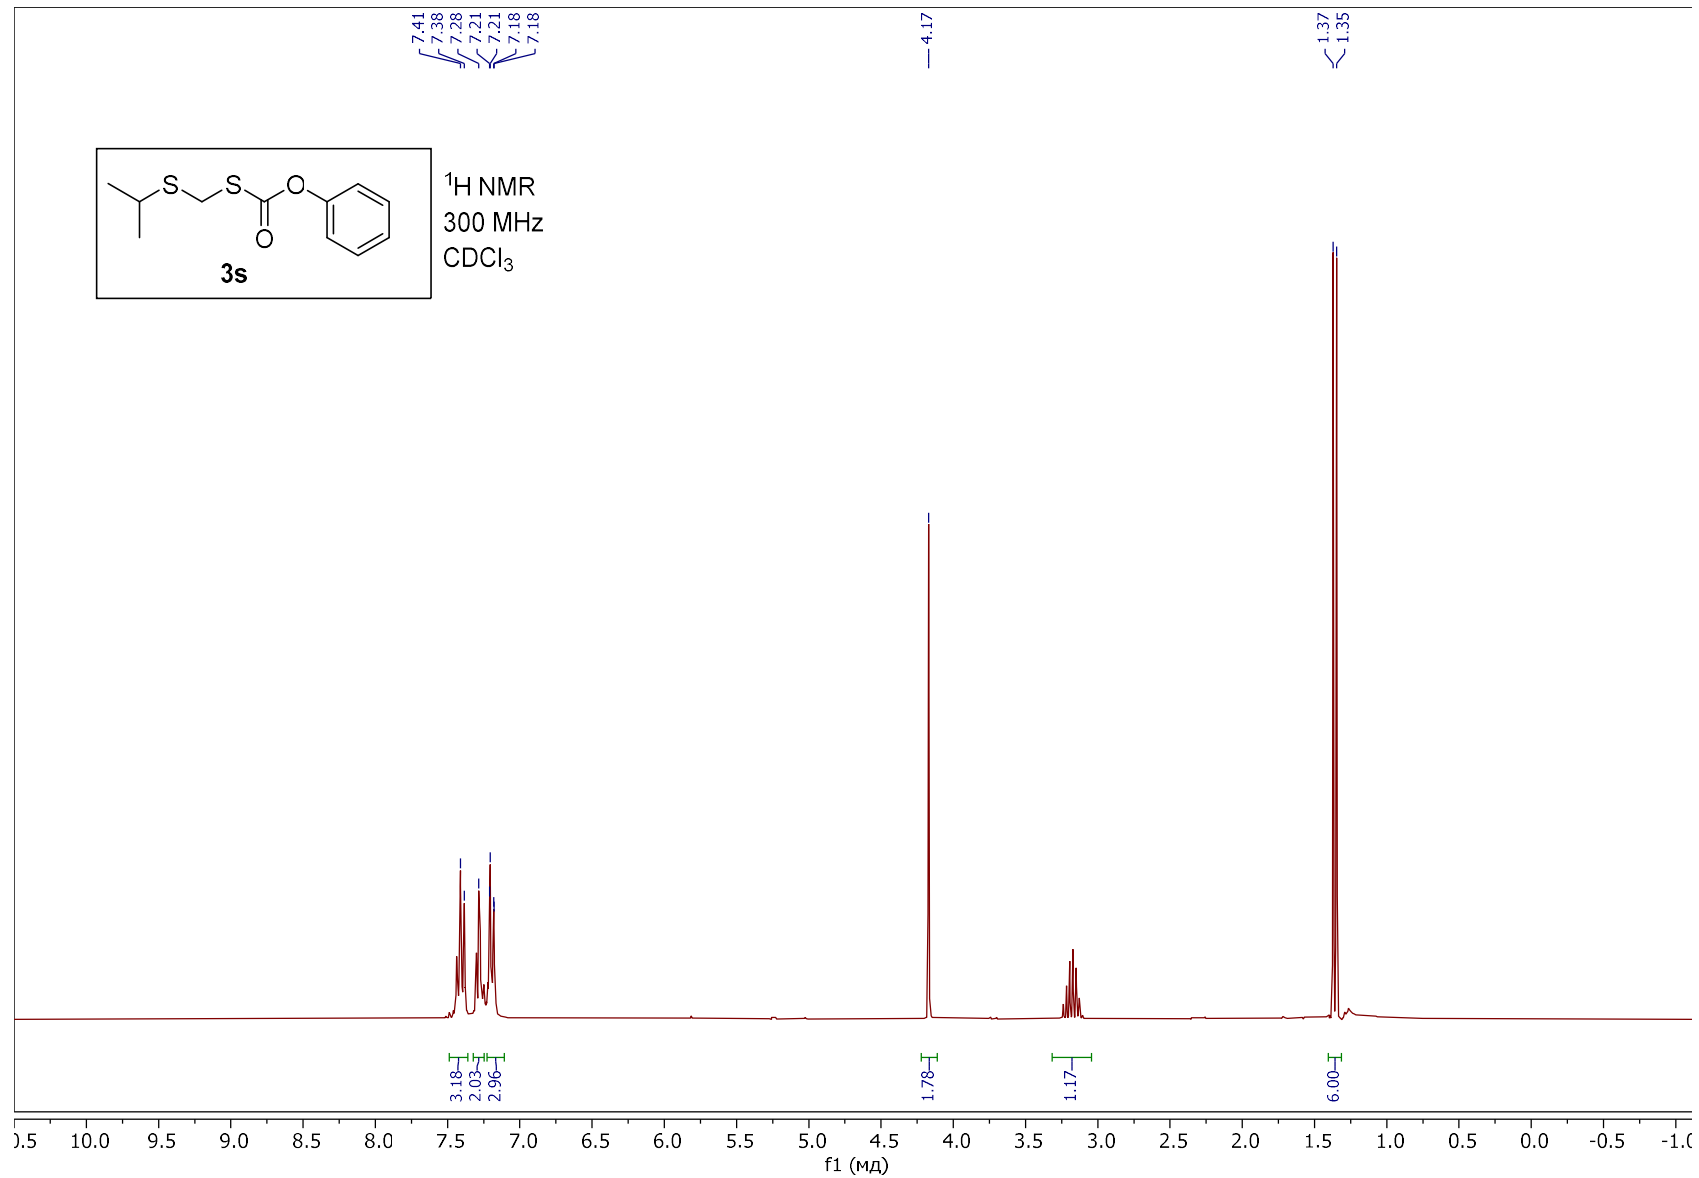

S137

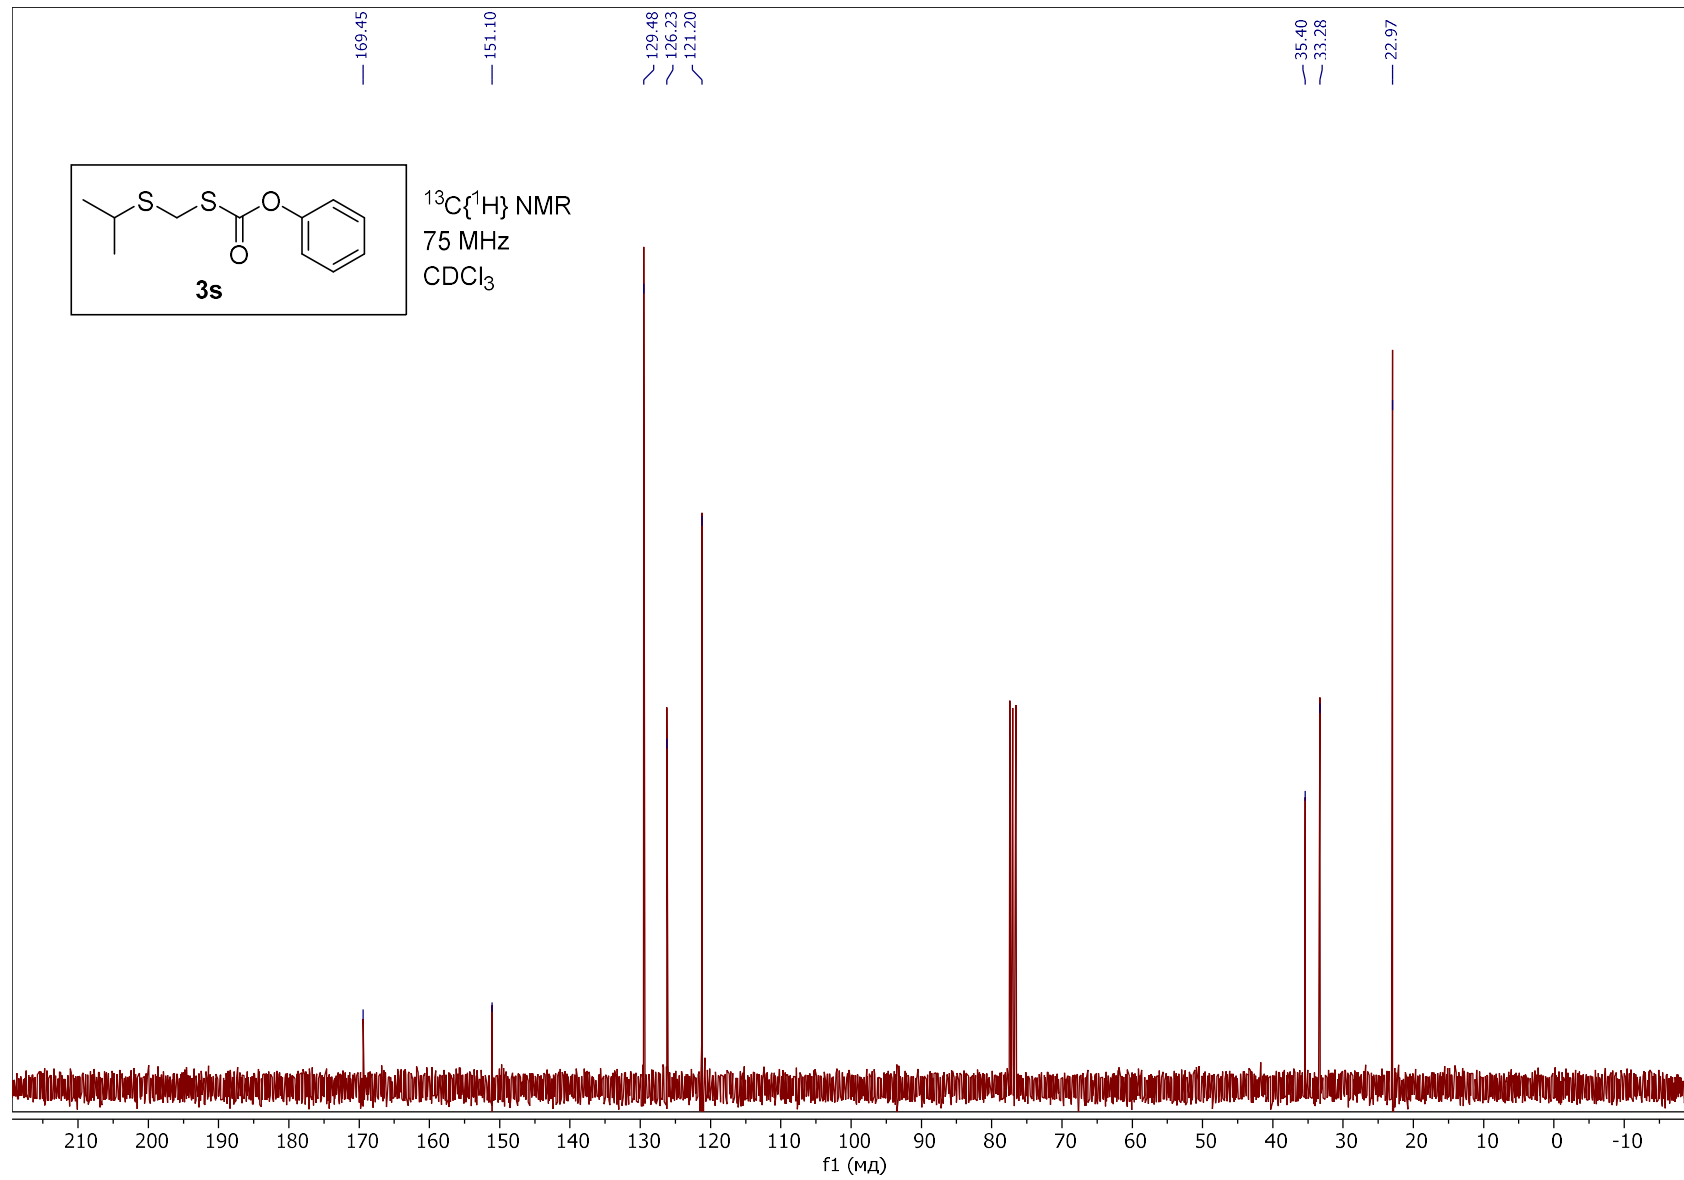

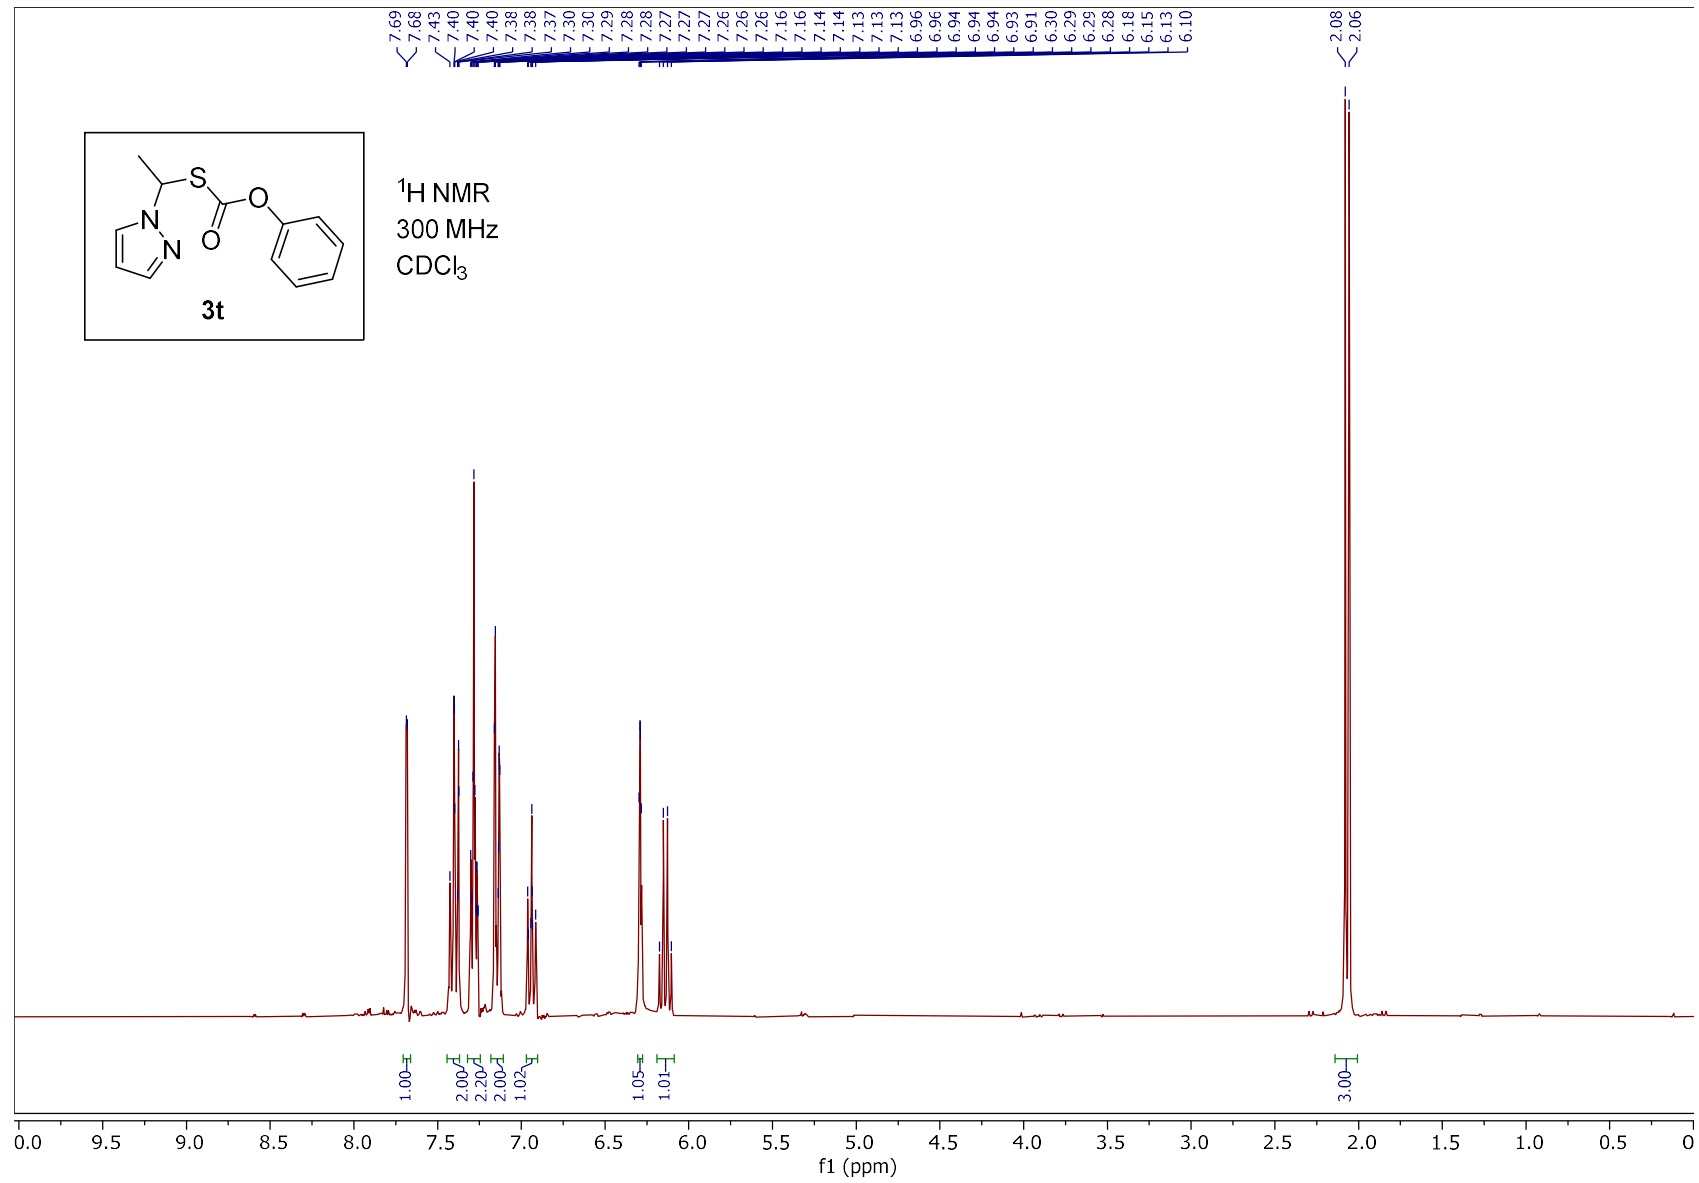

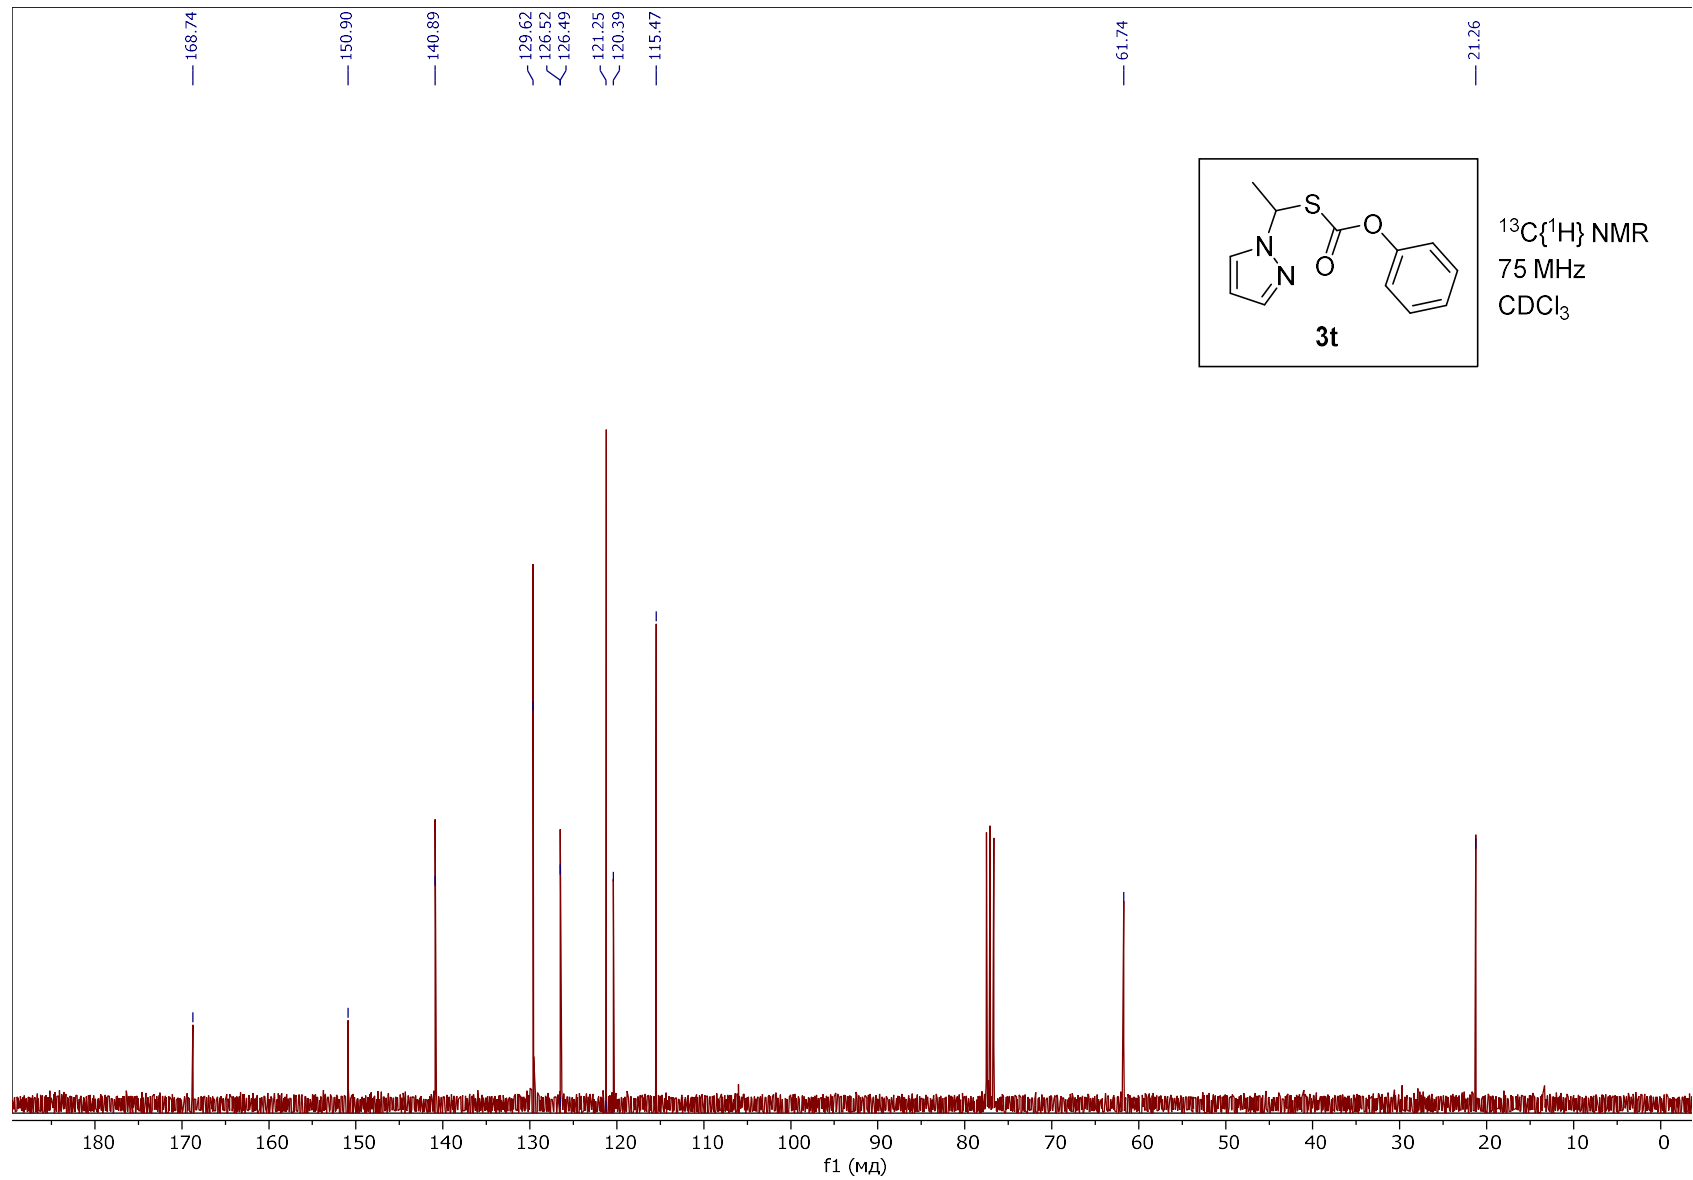

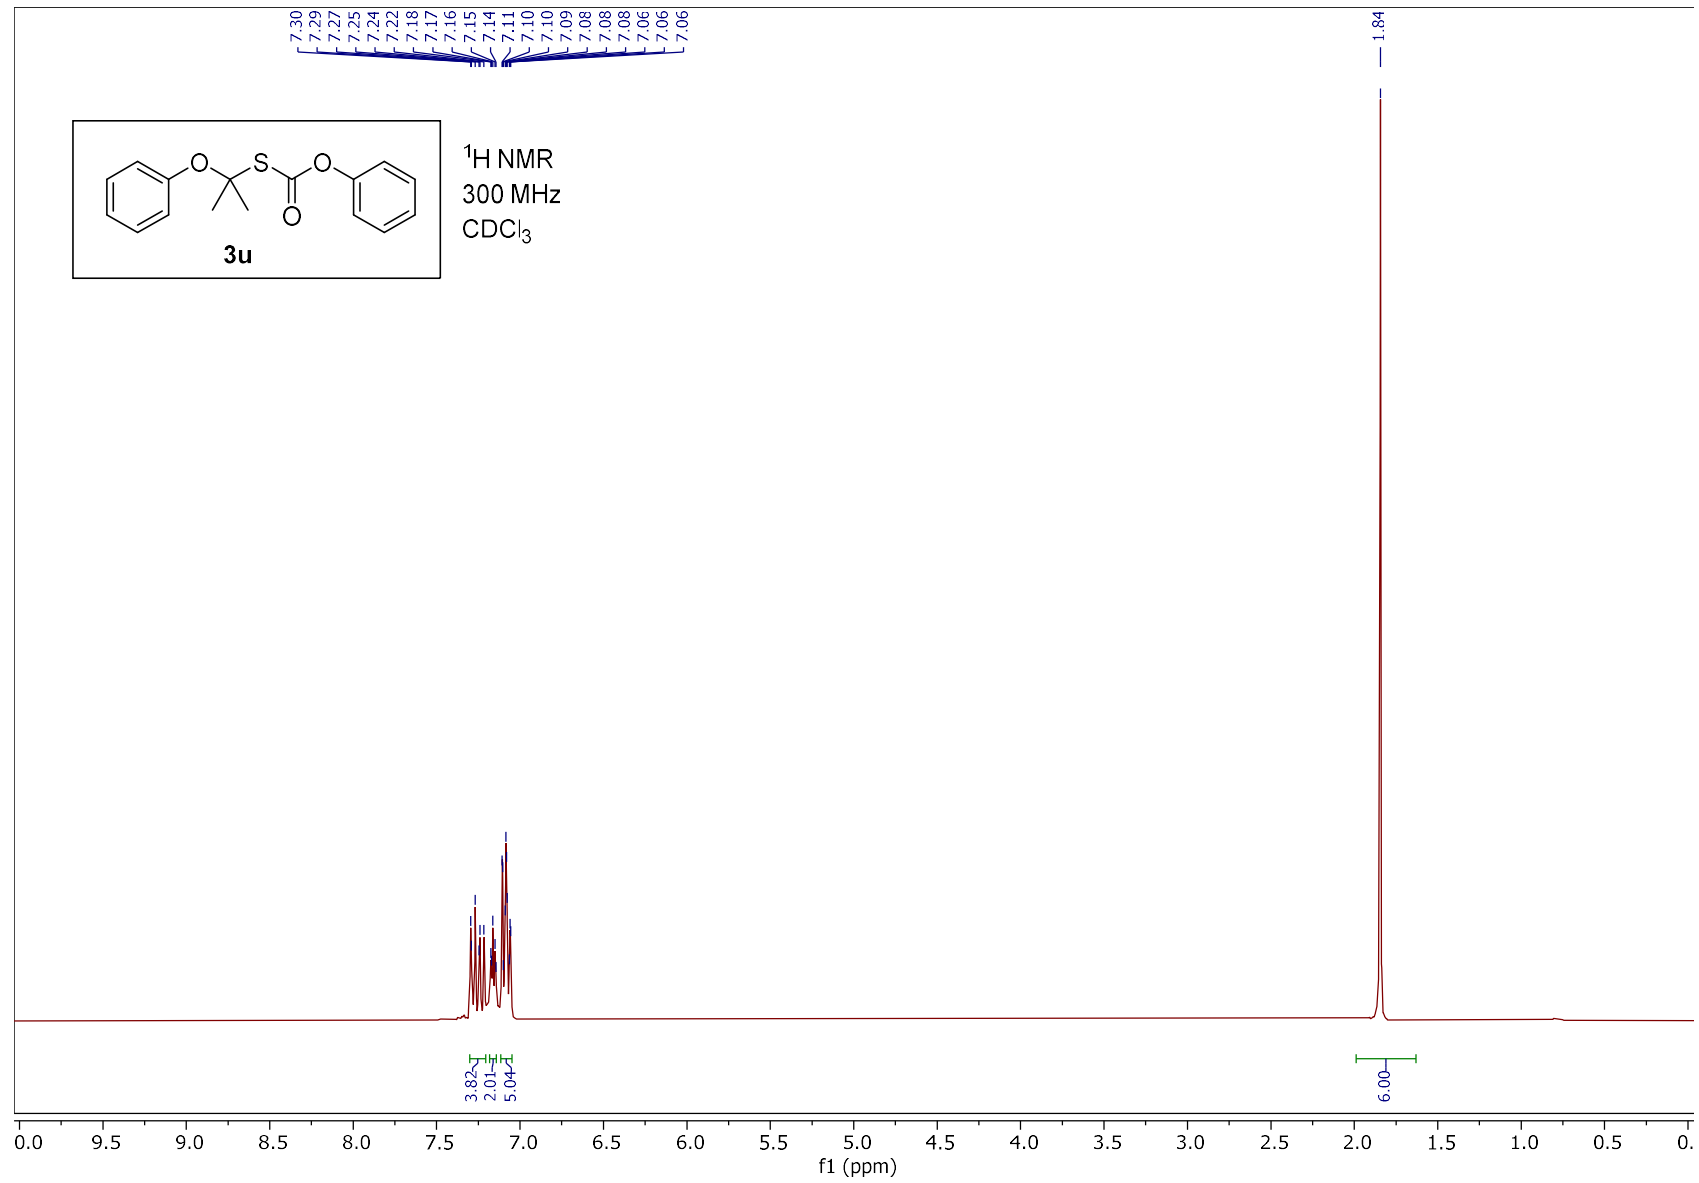

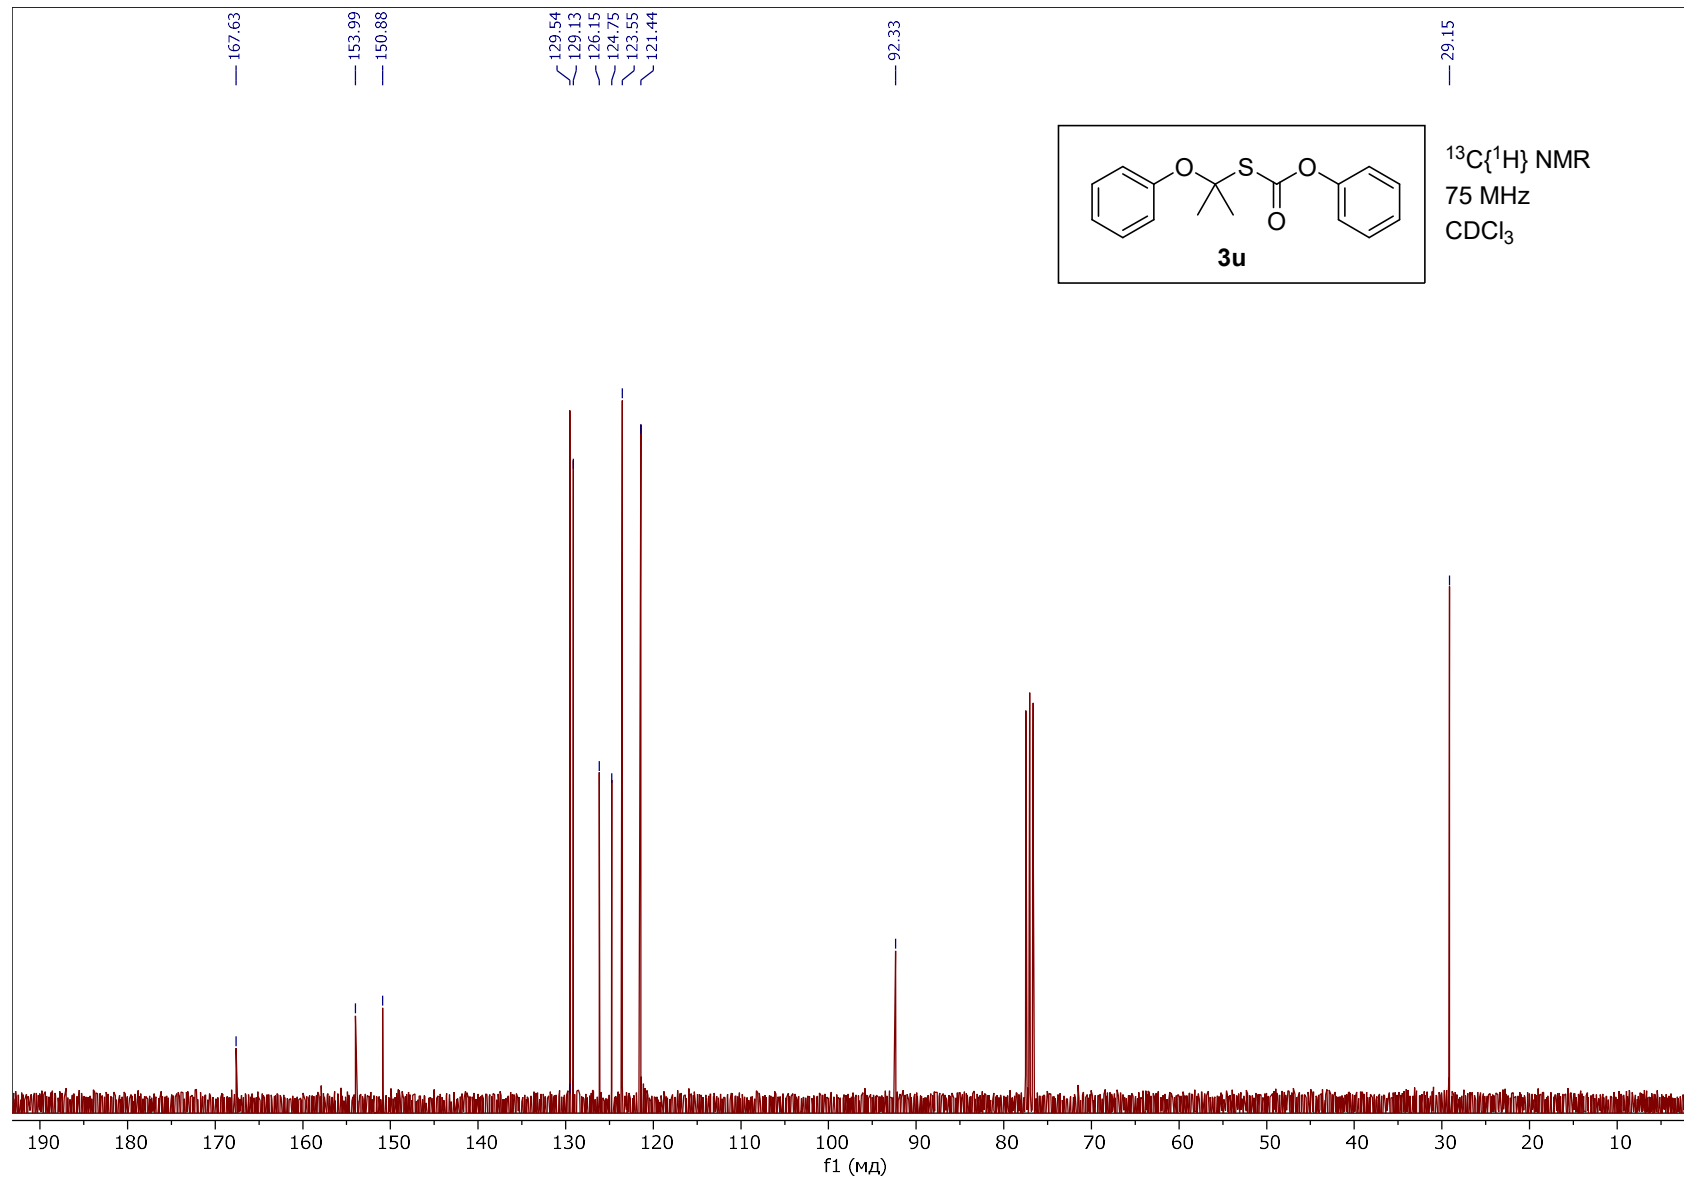

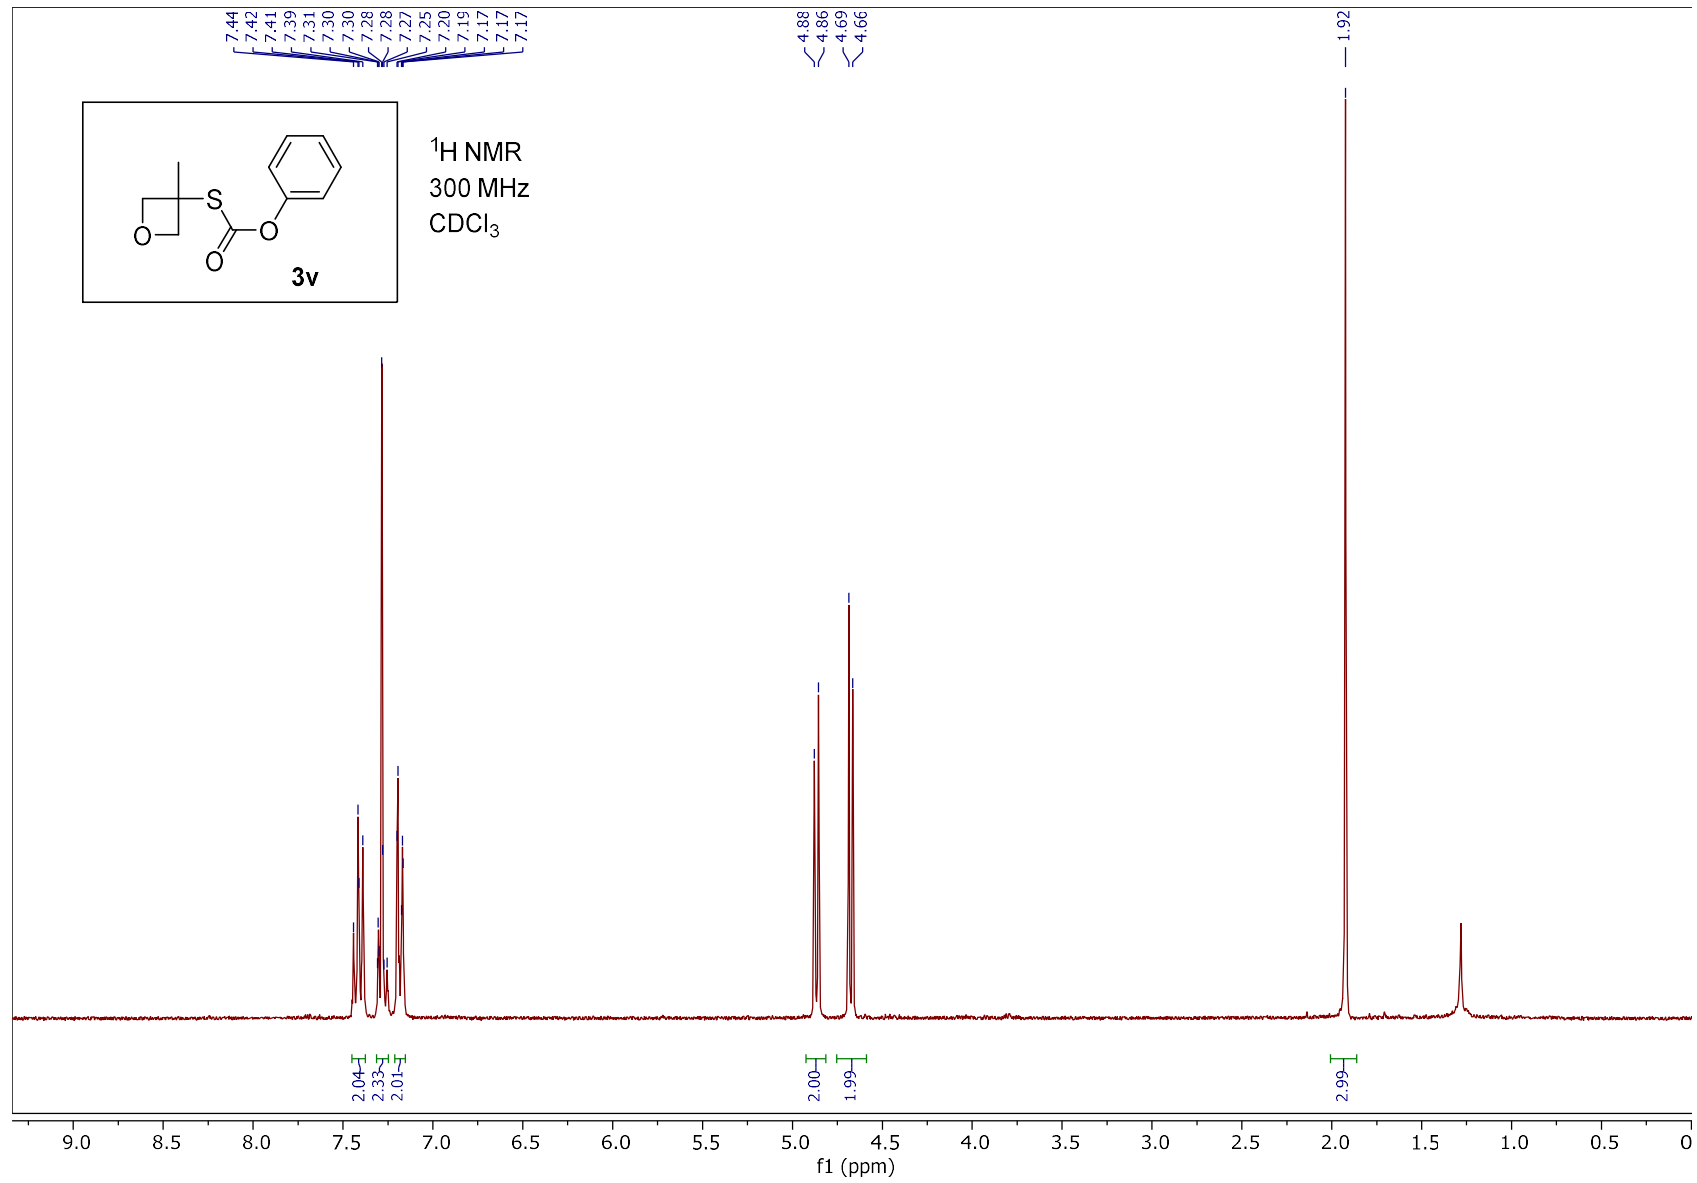

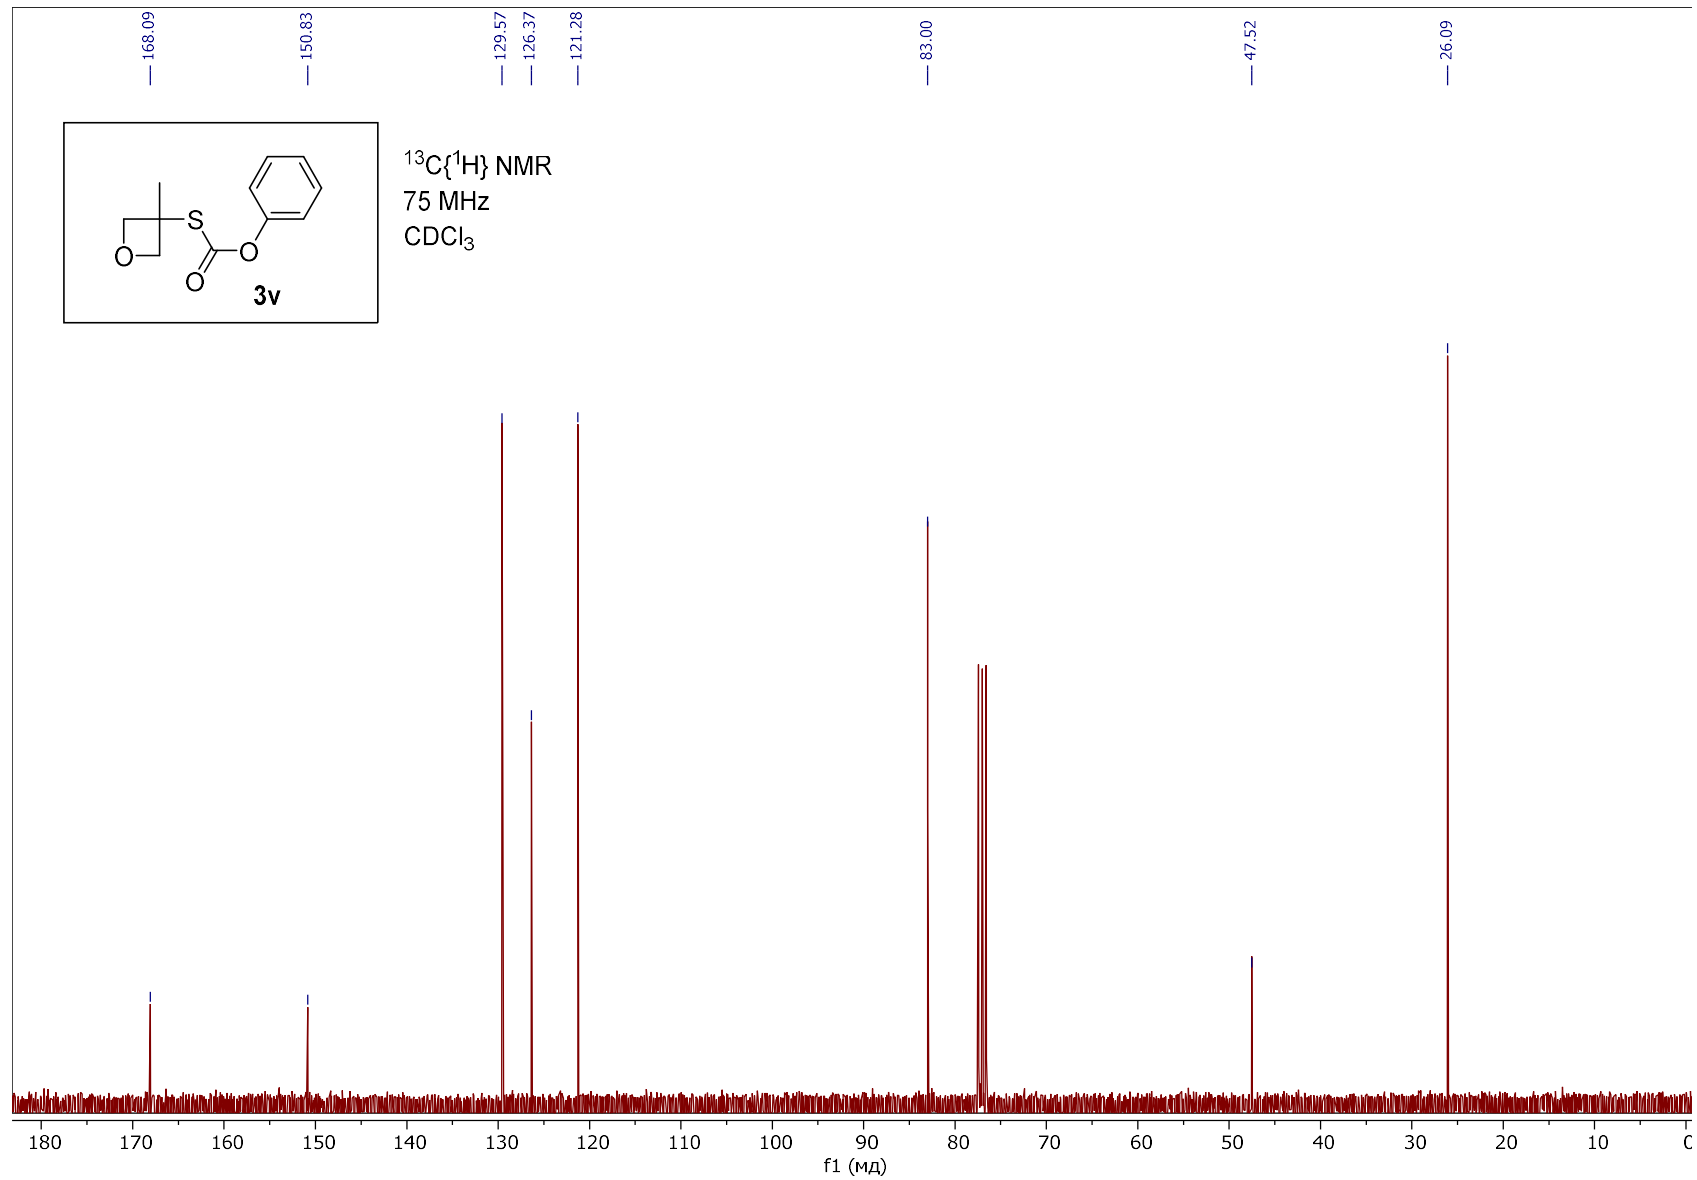



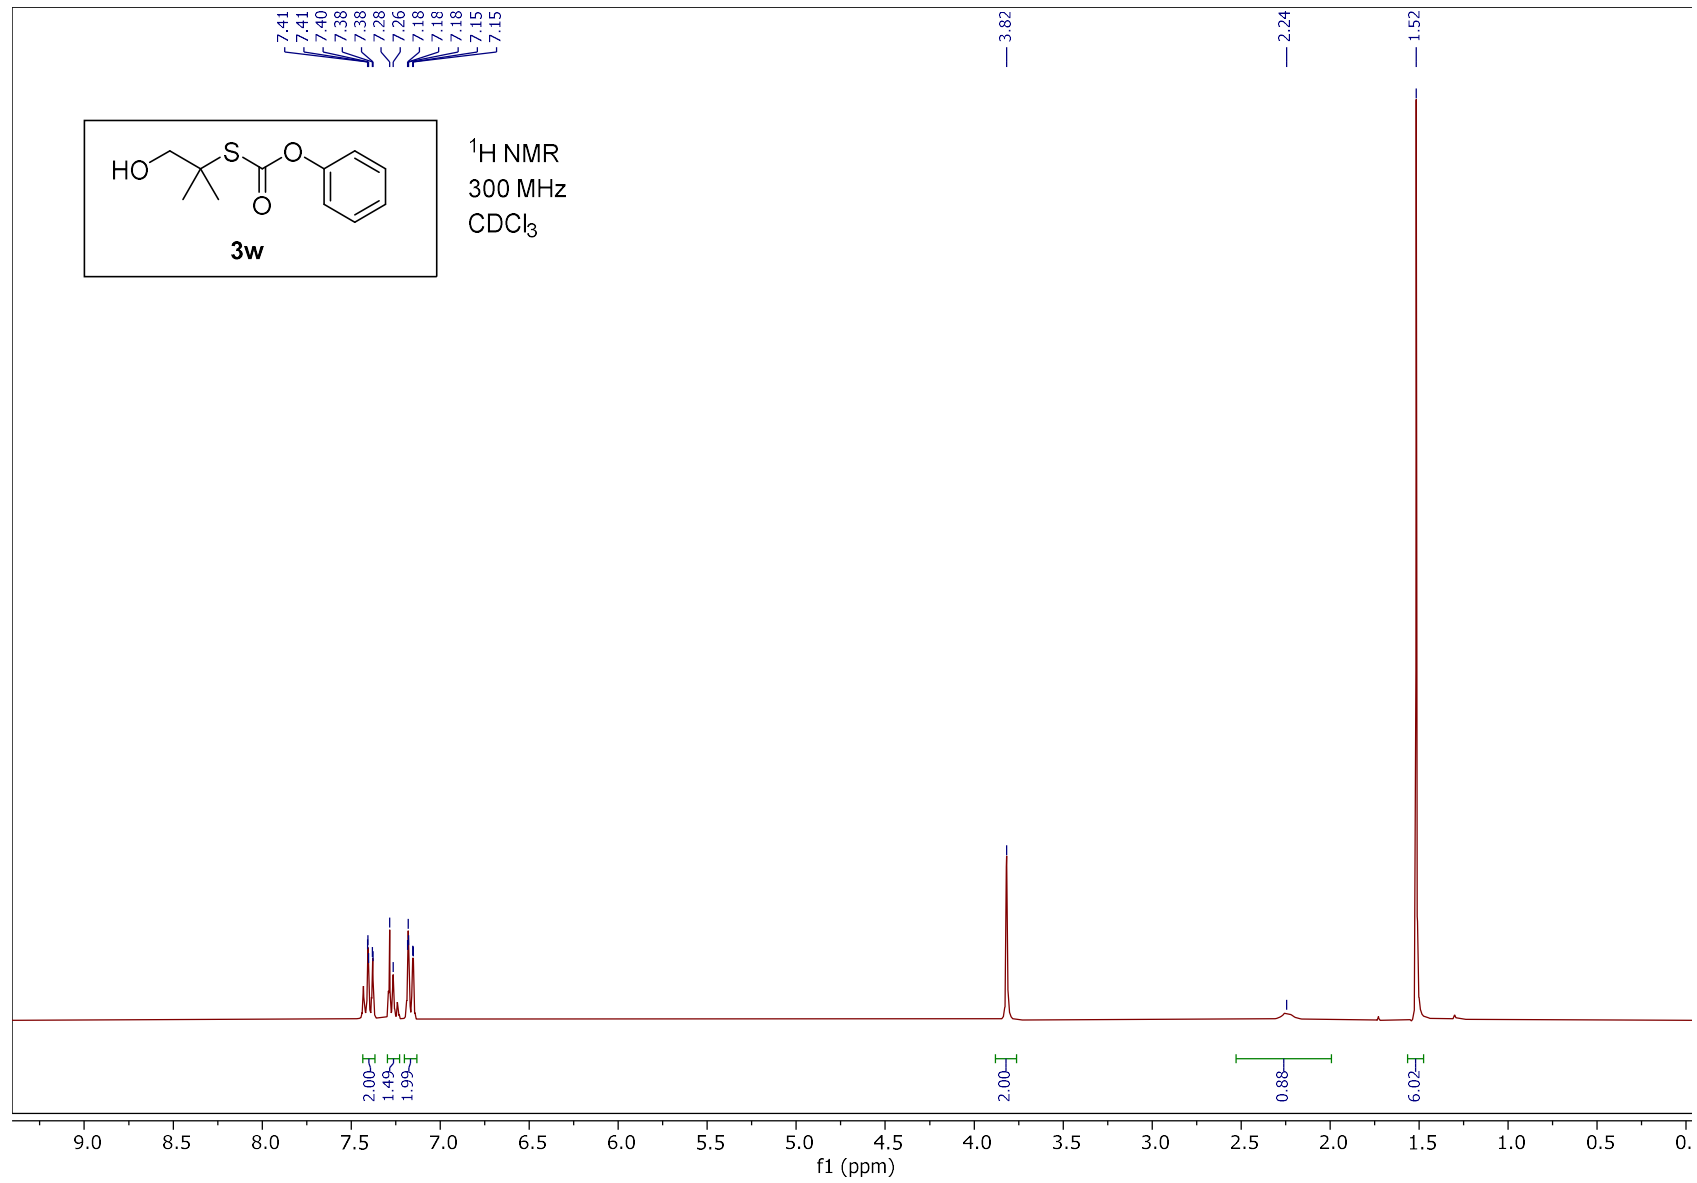

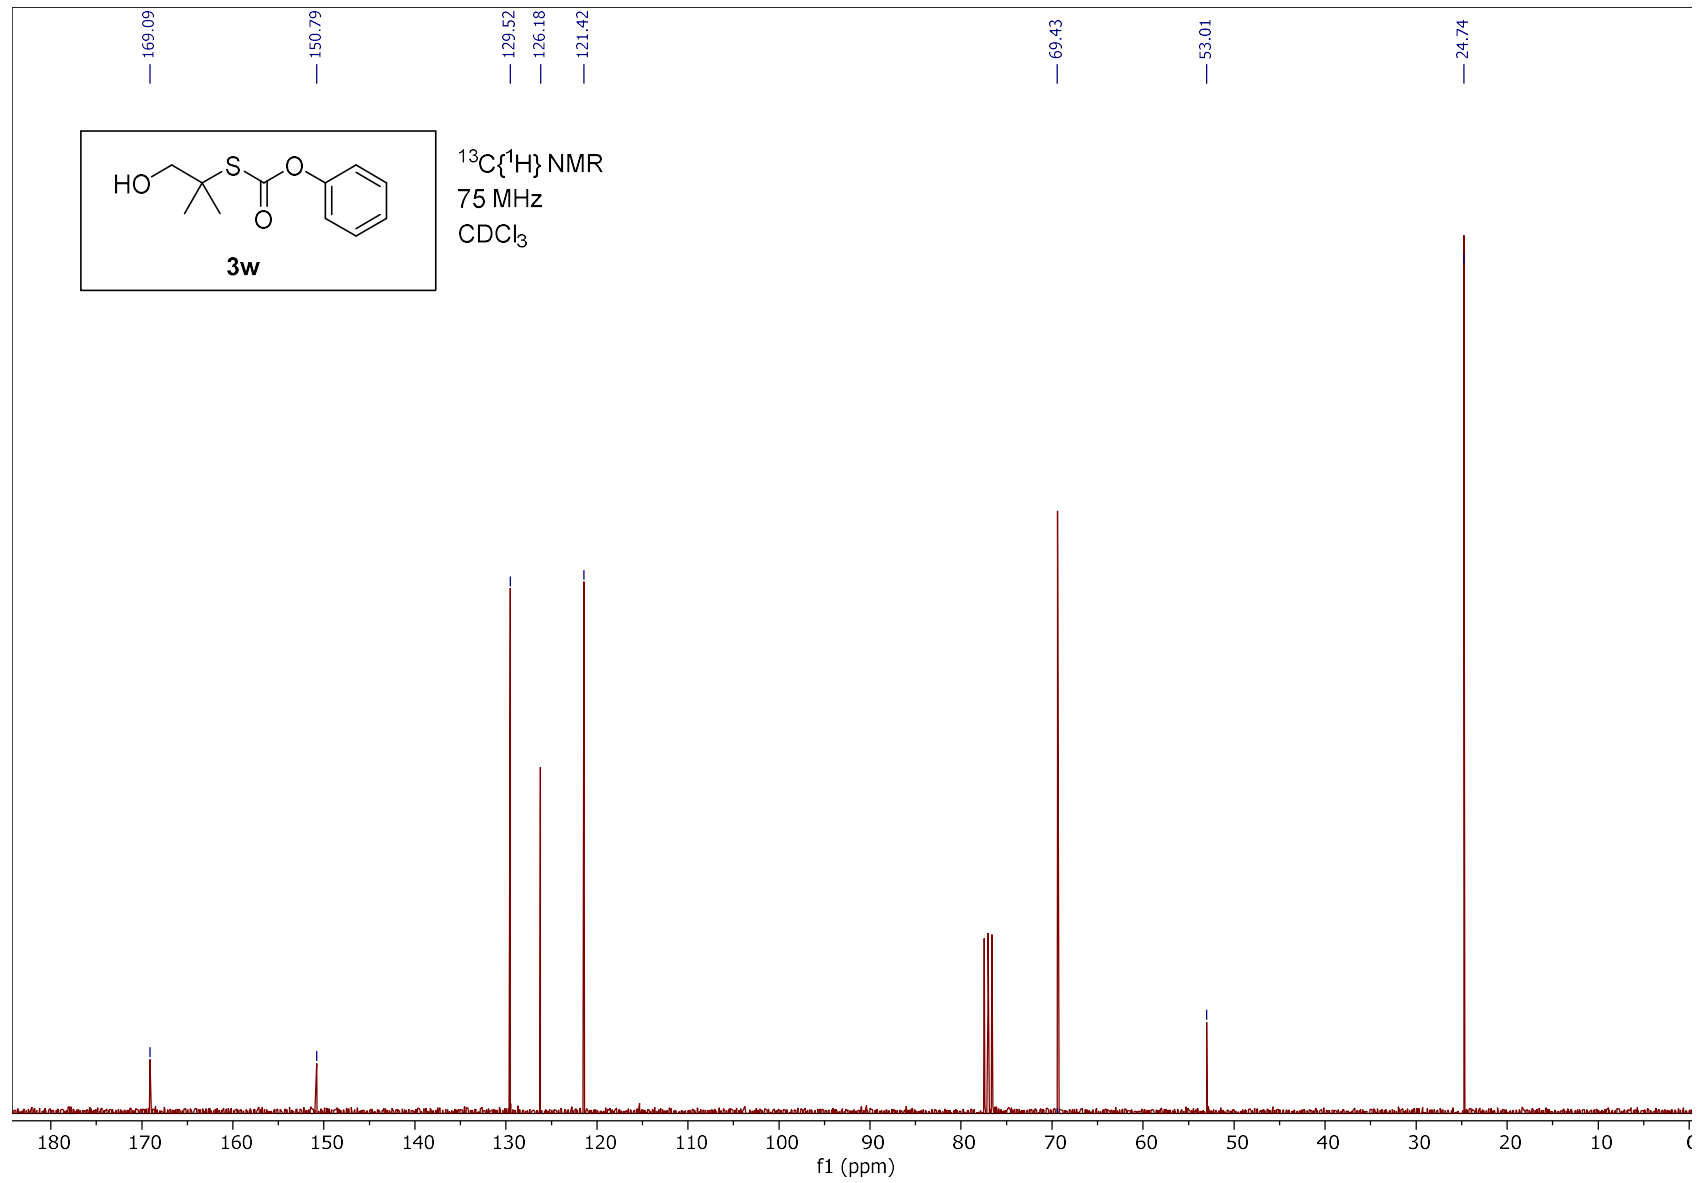

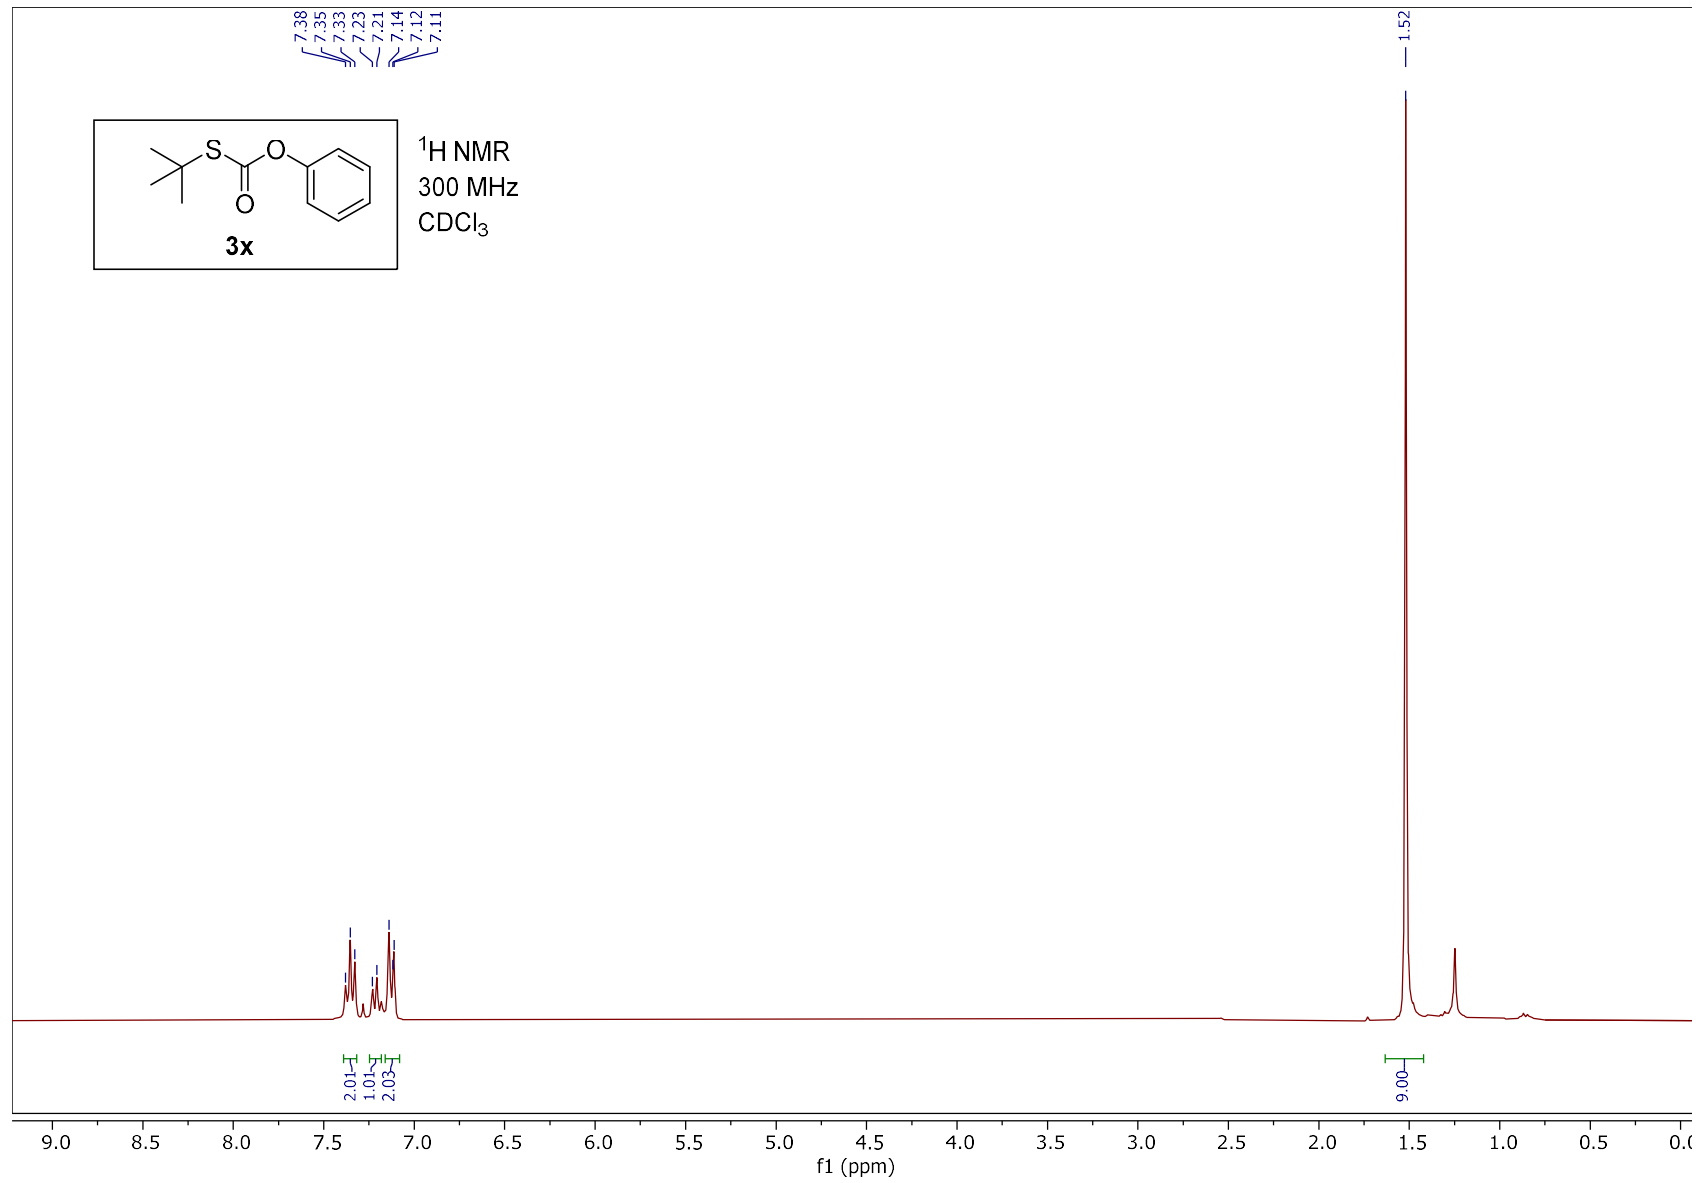

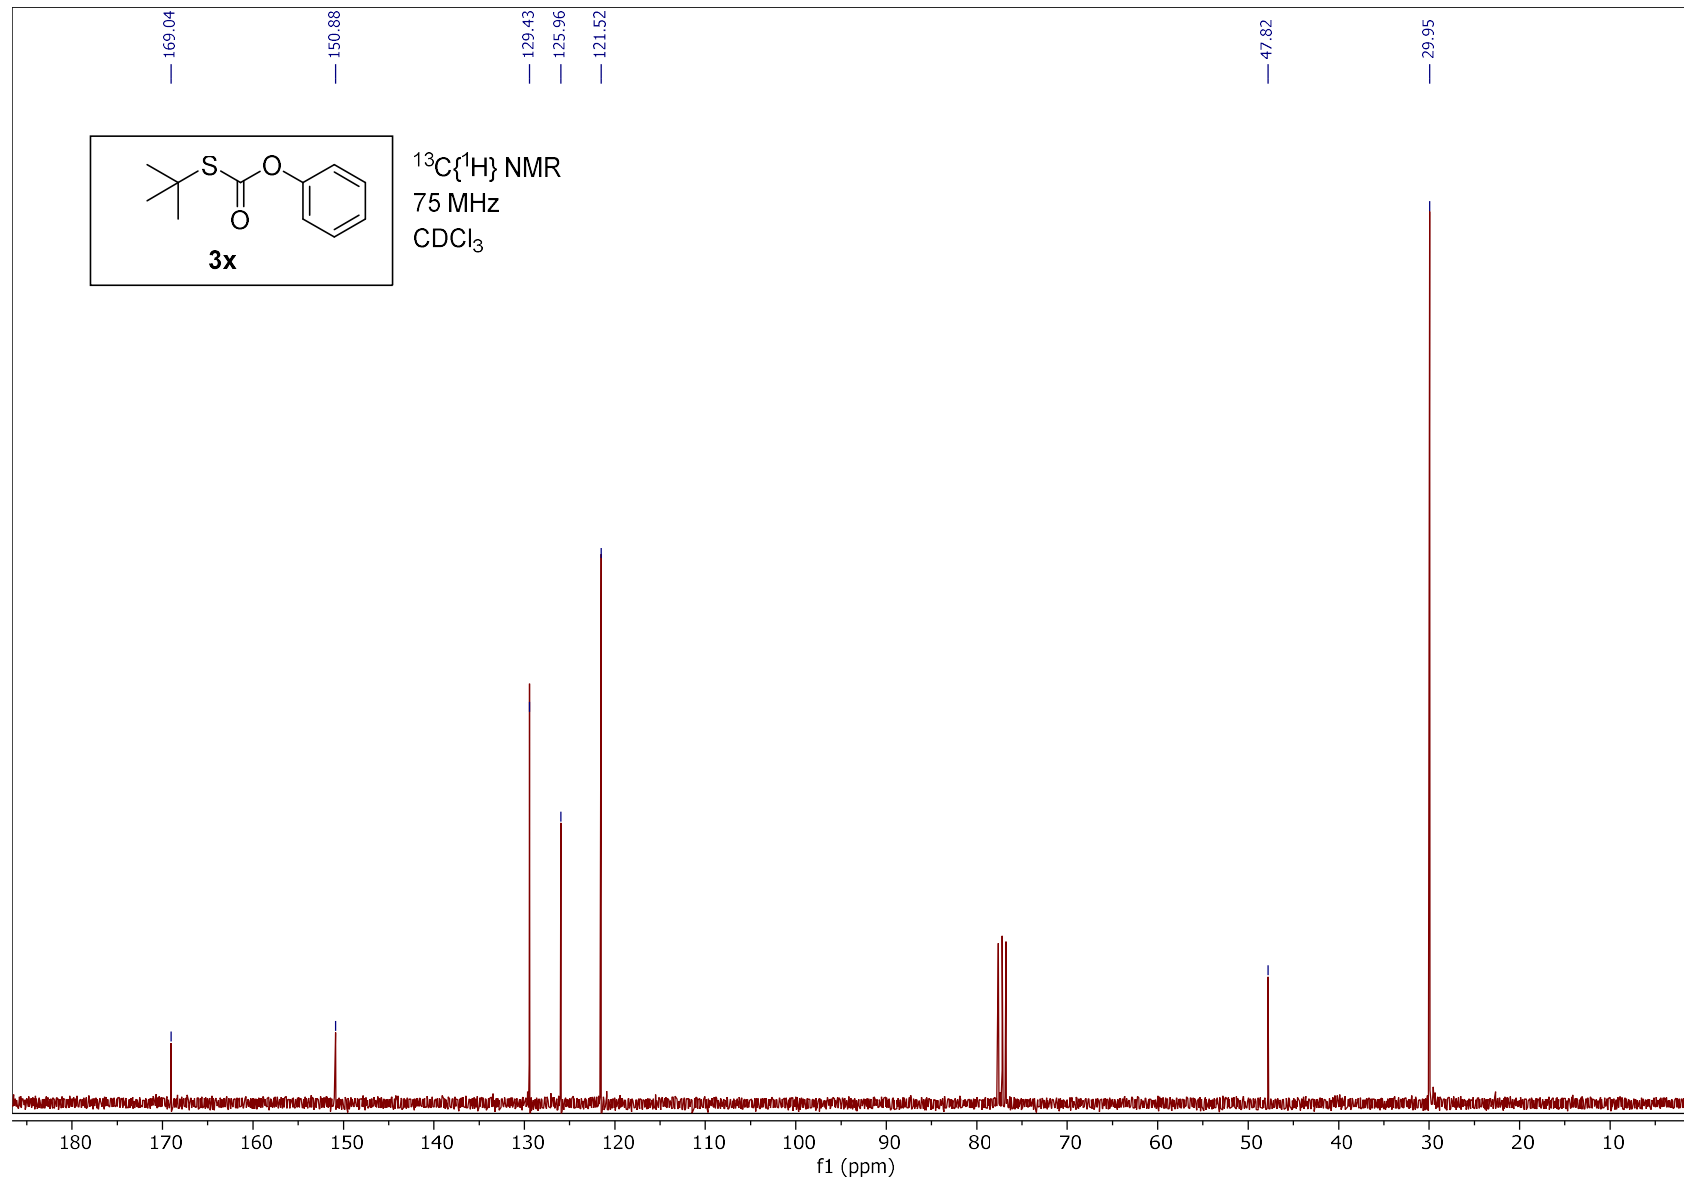

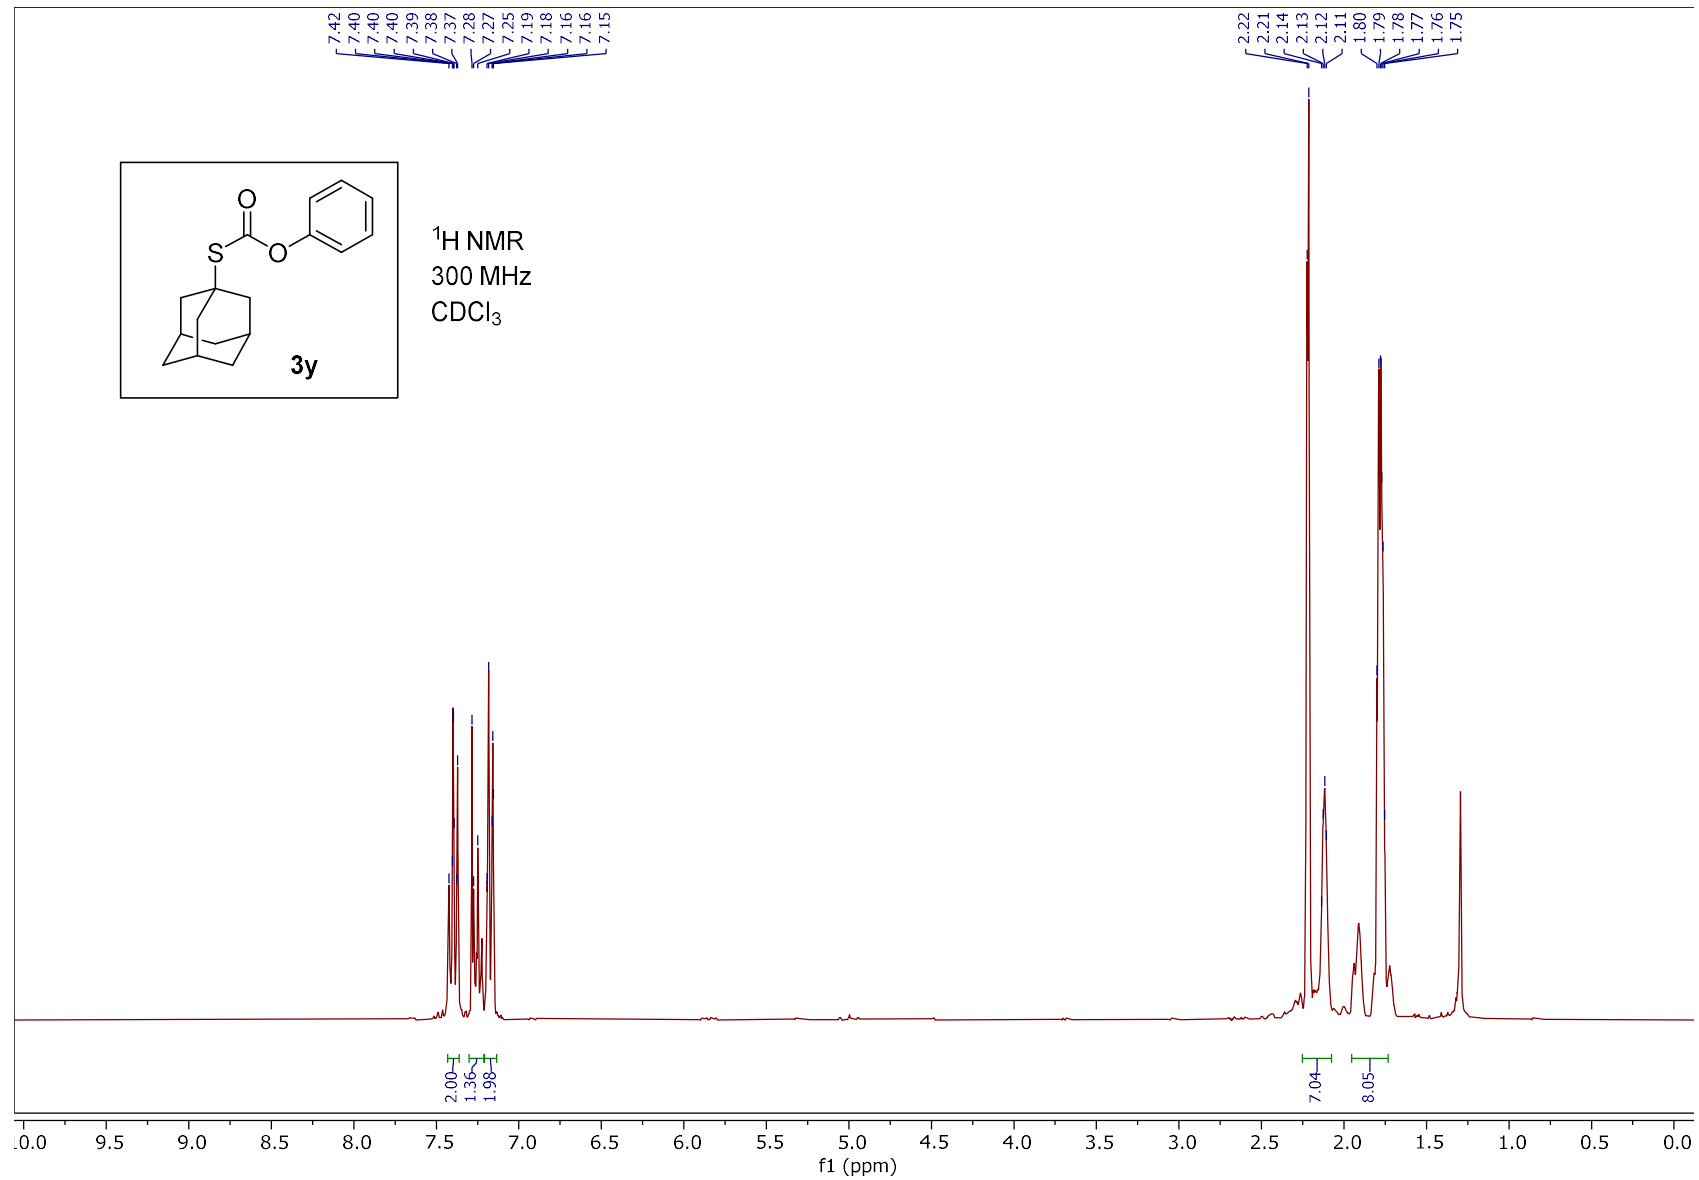

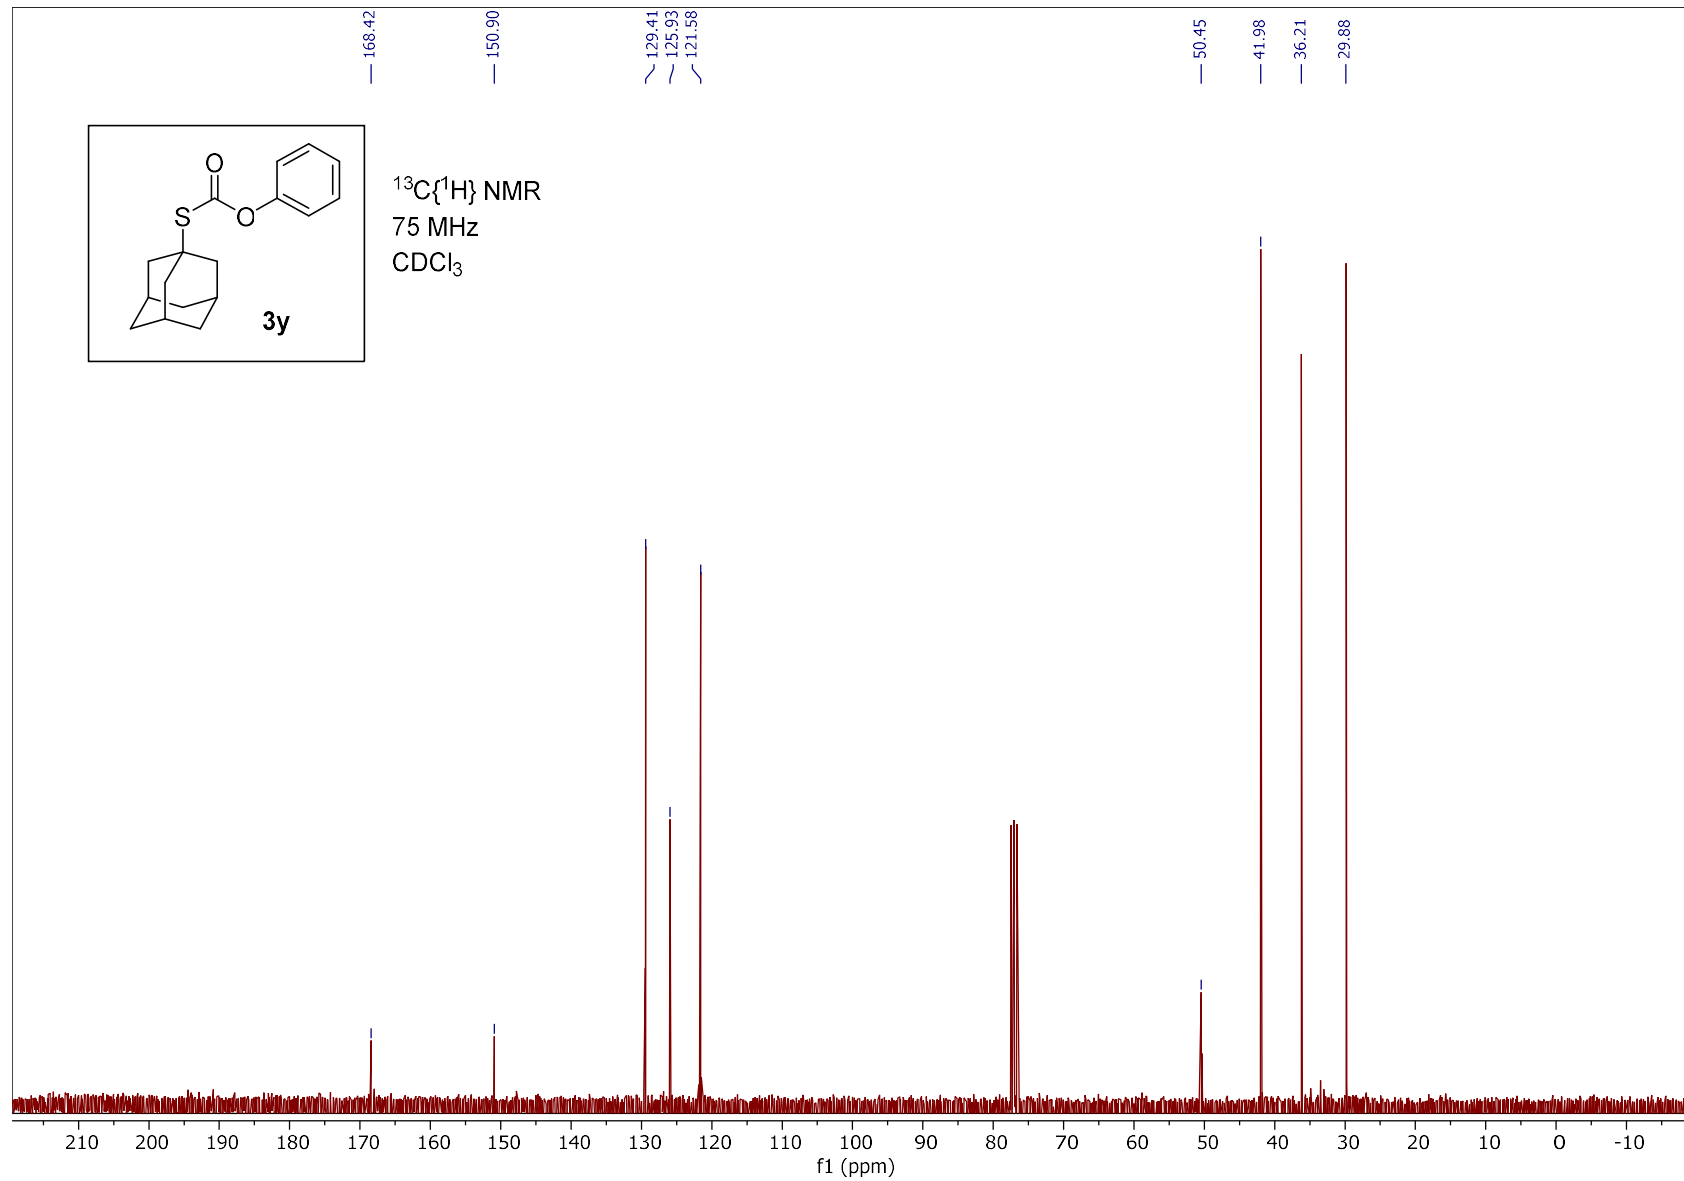

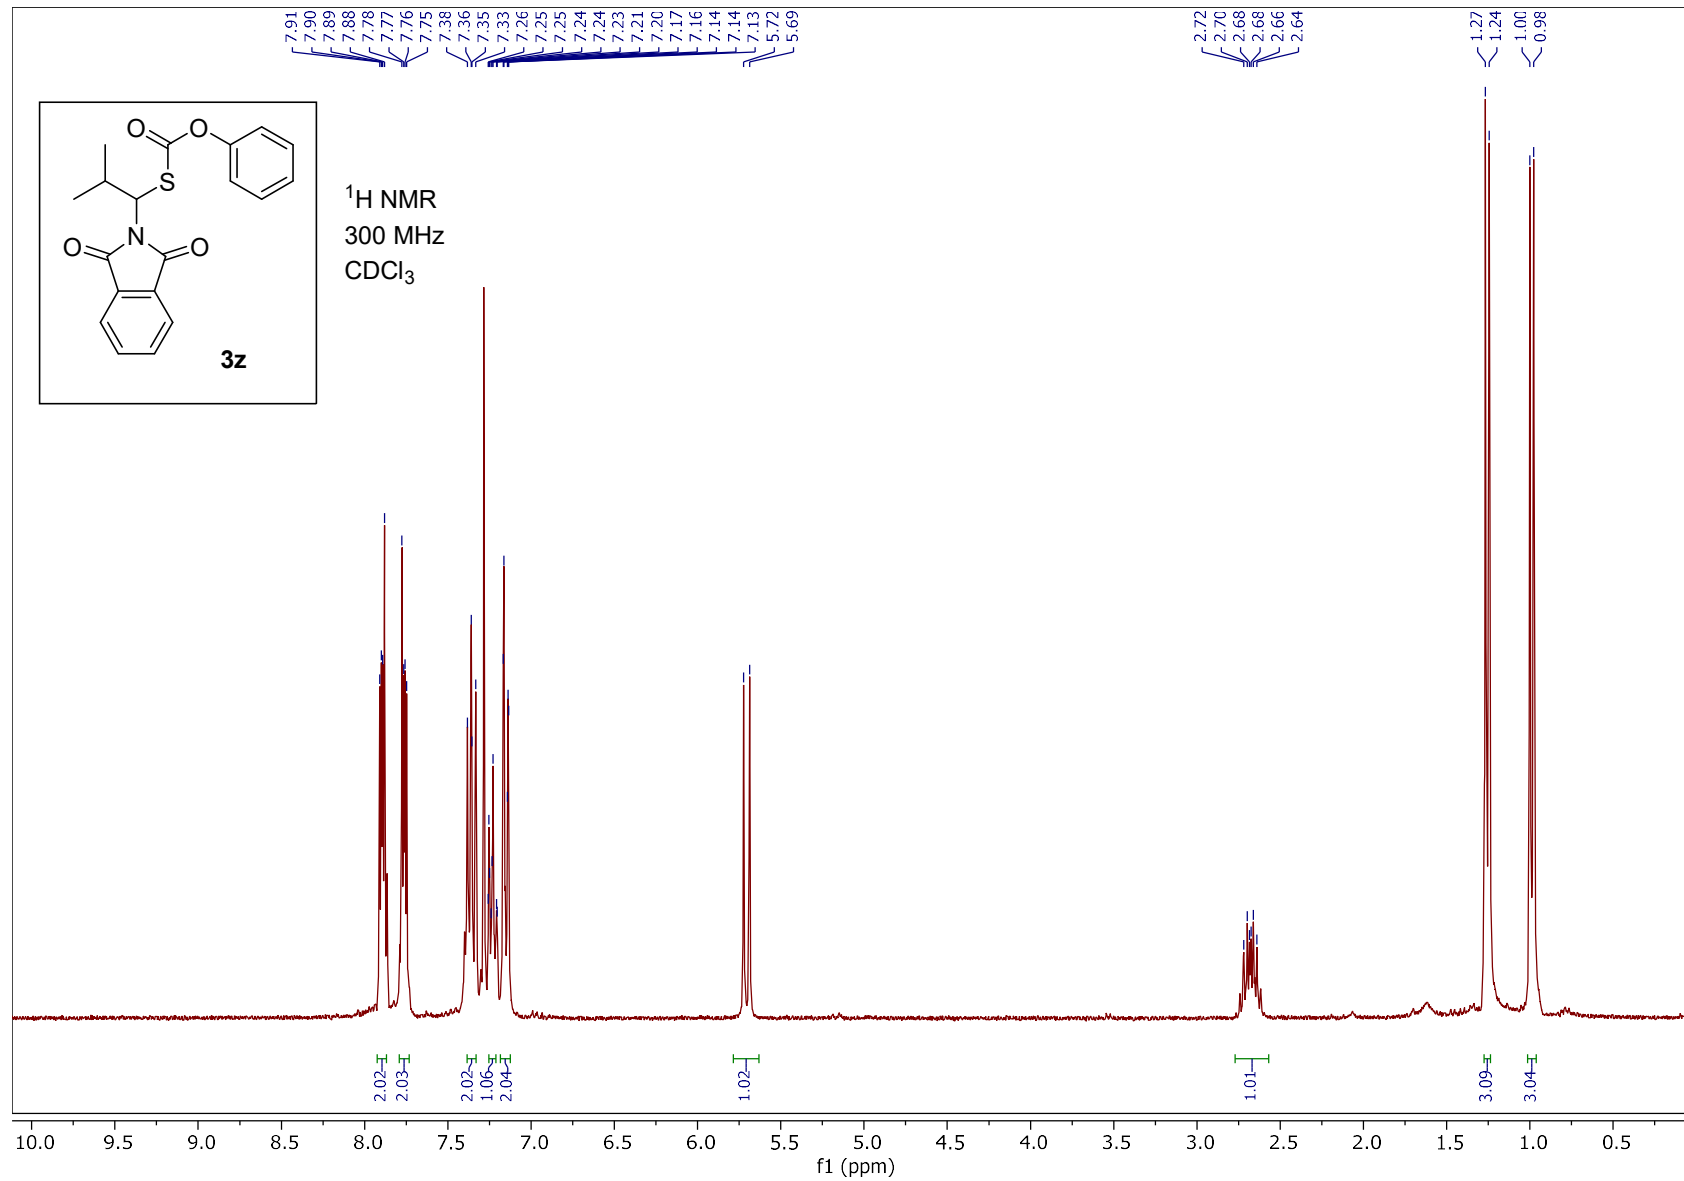

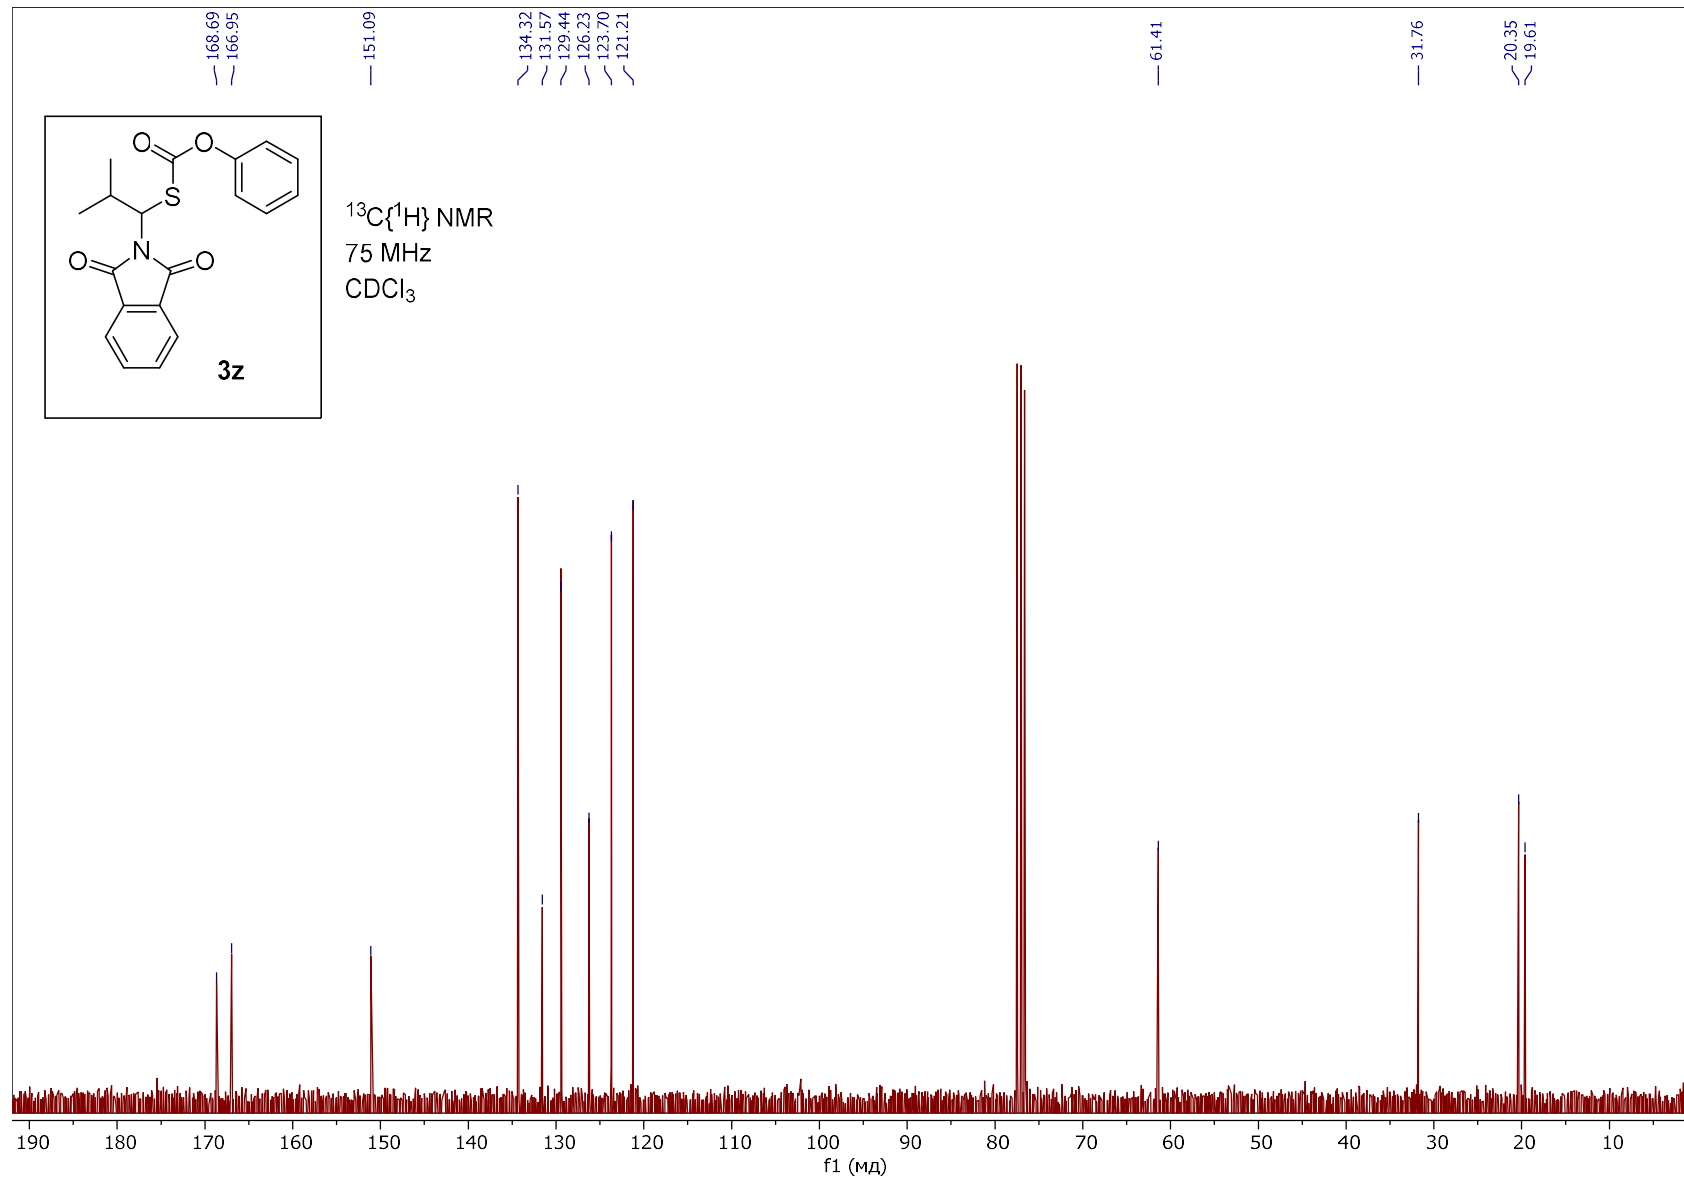



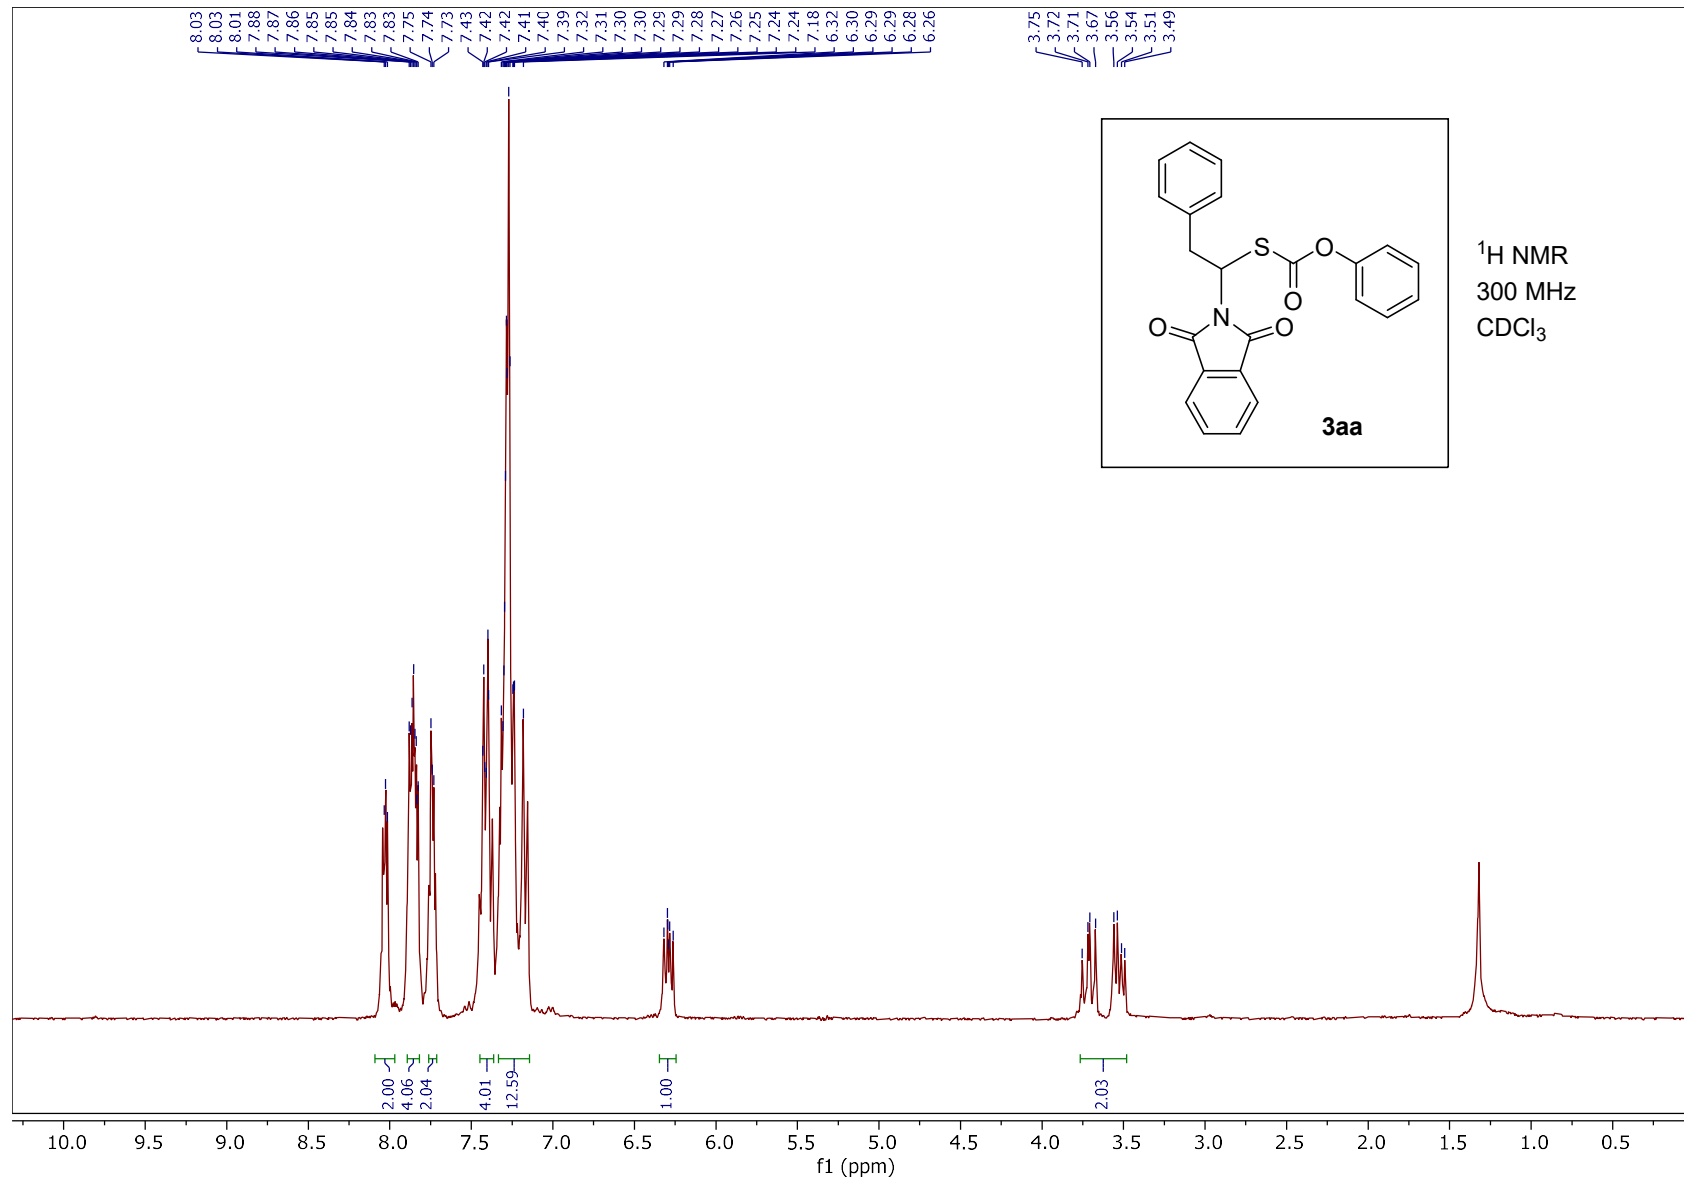

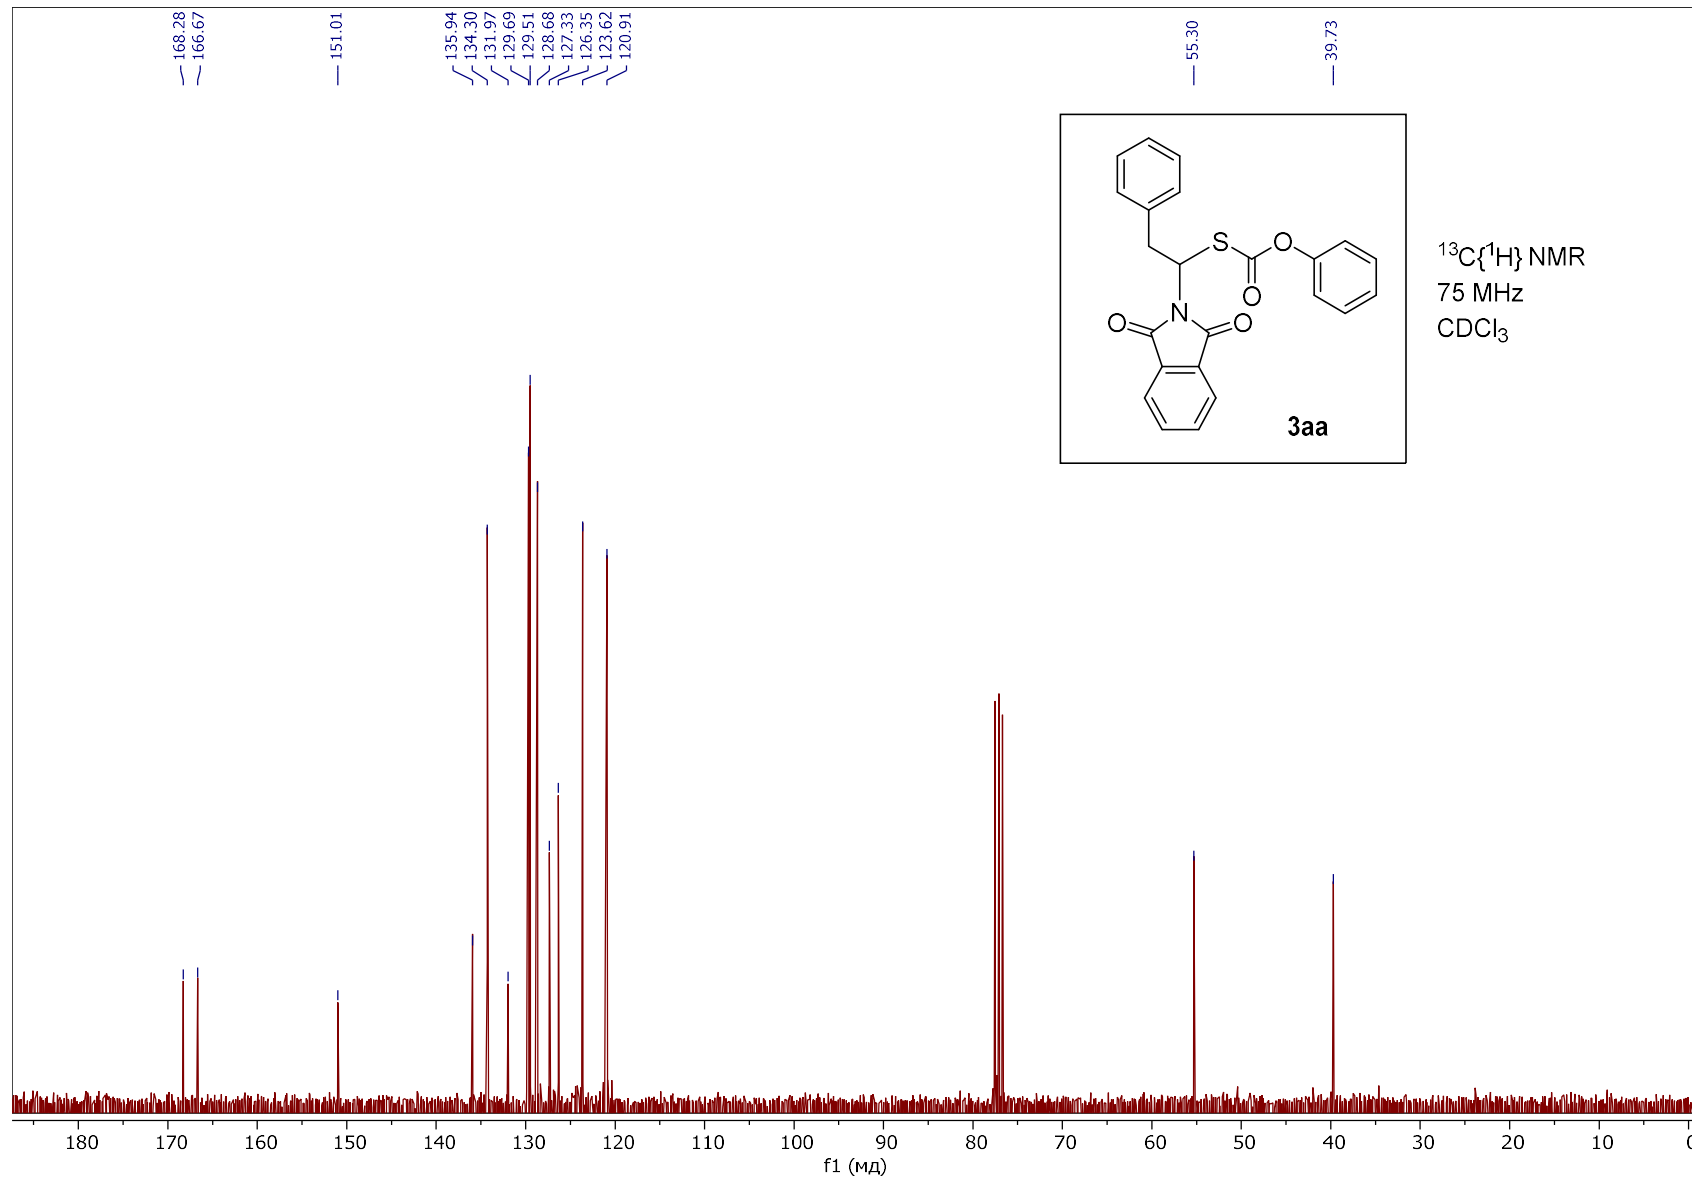

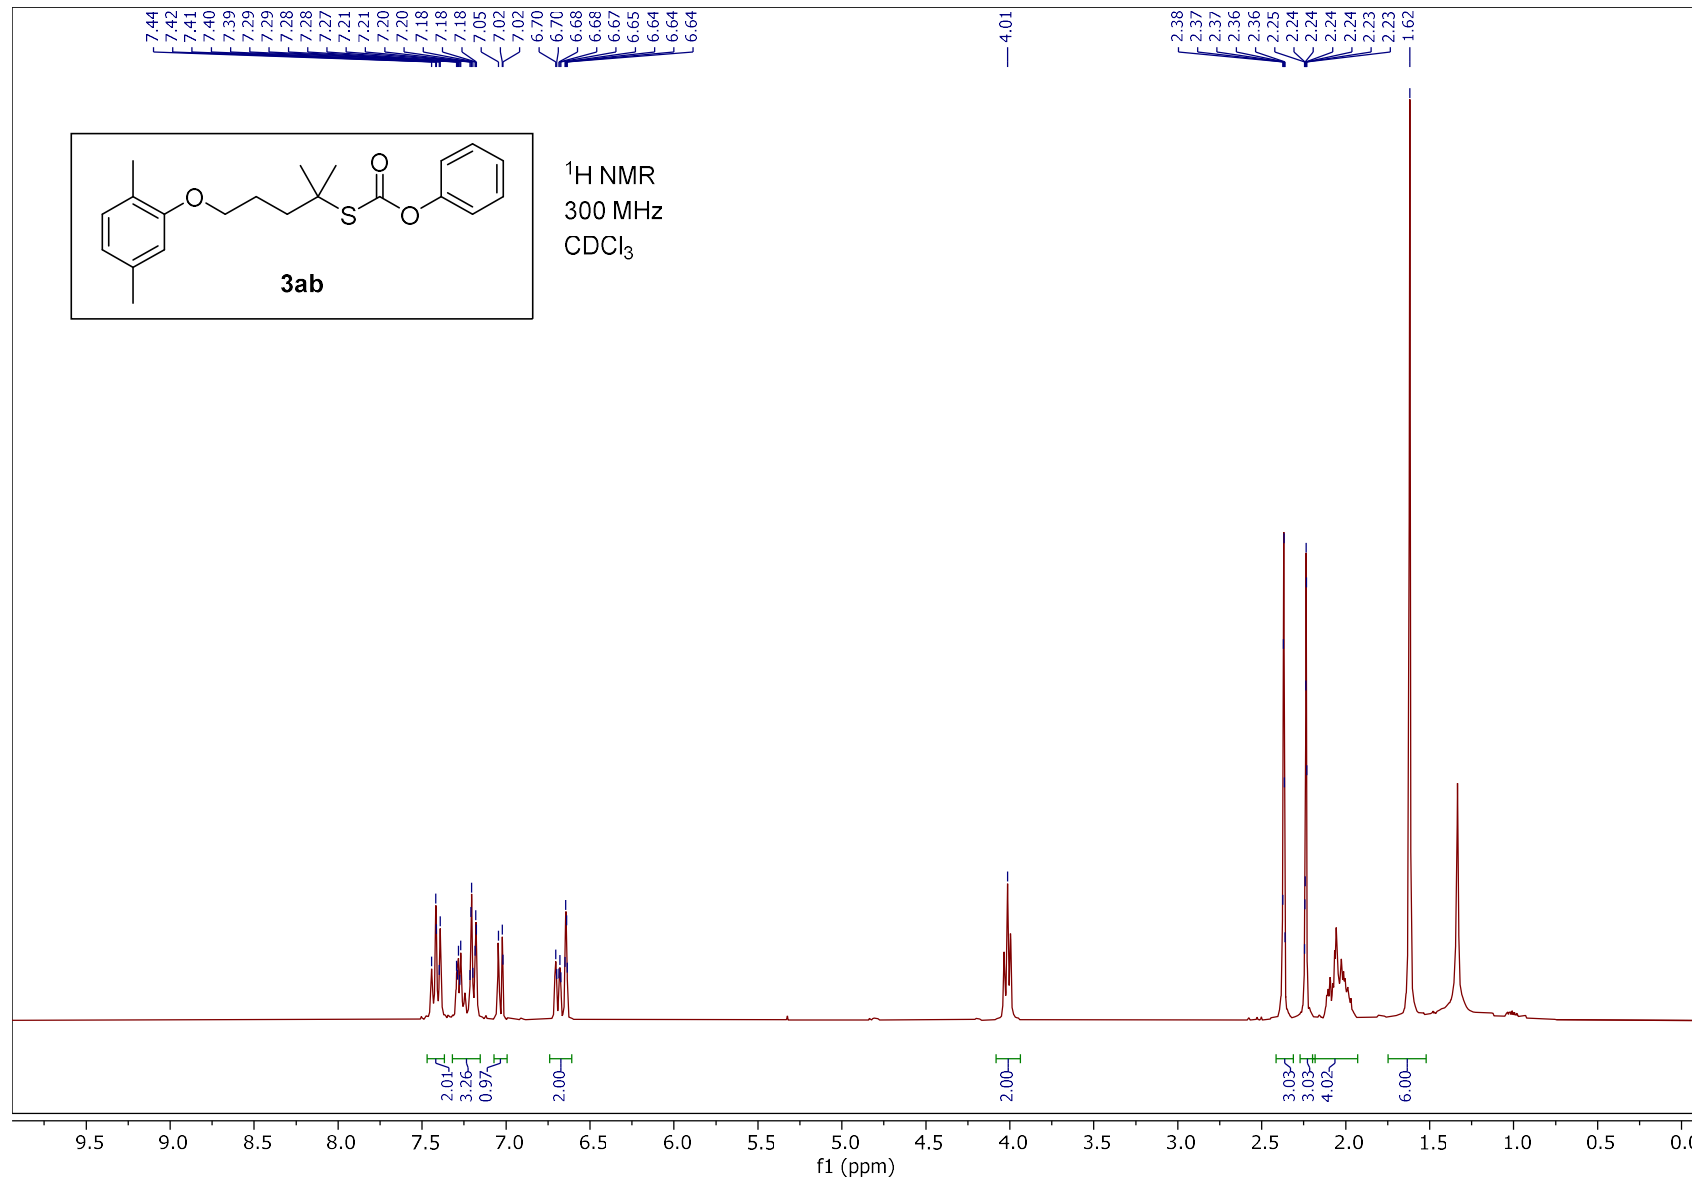

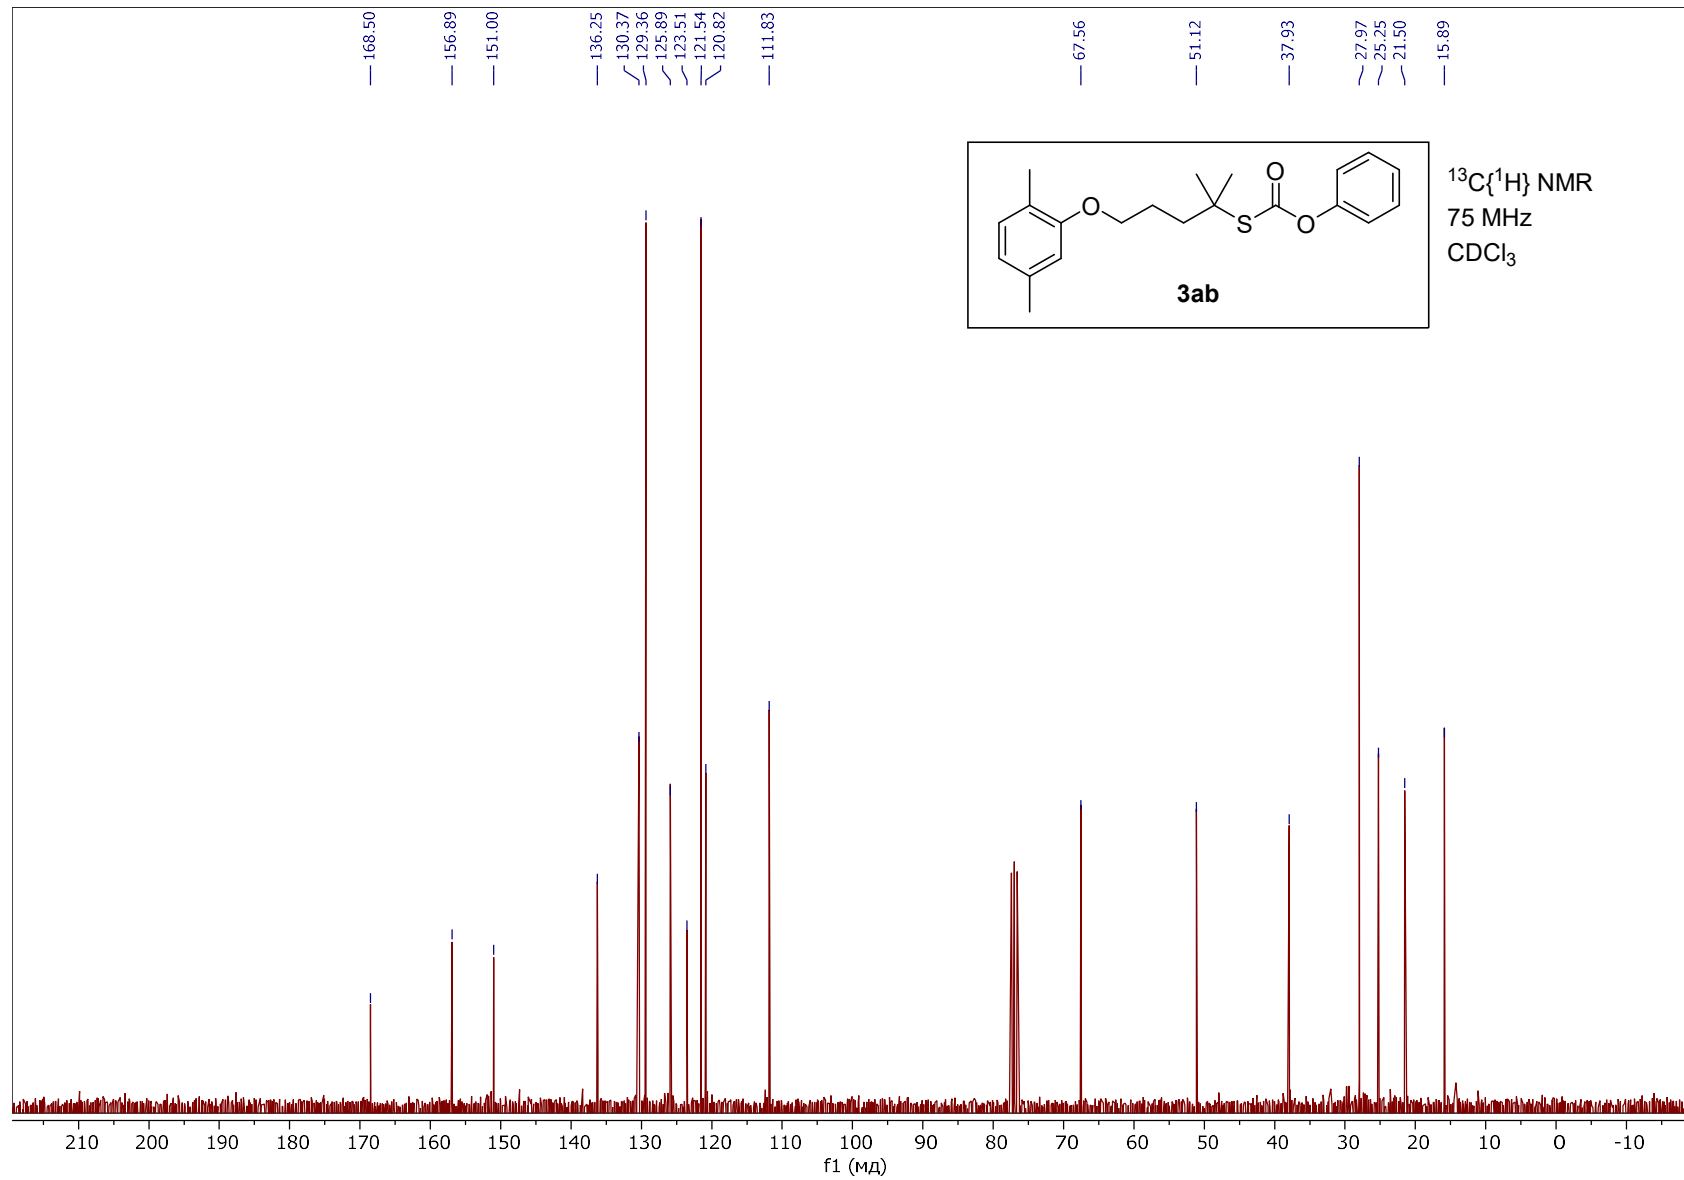

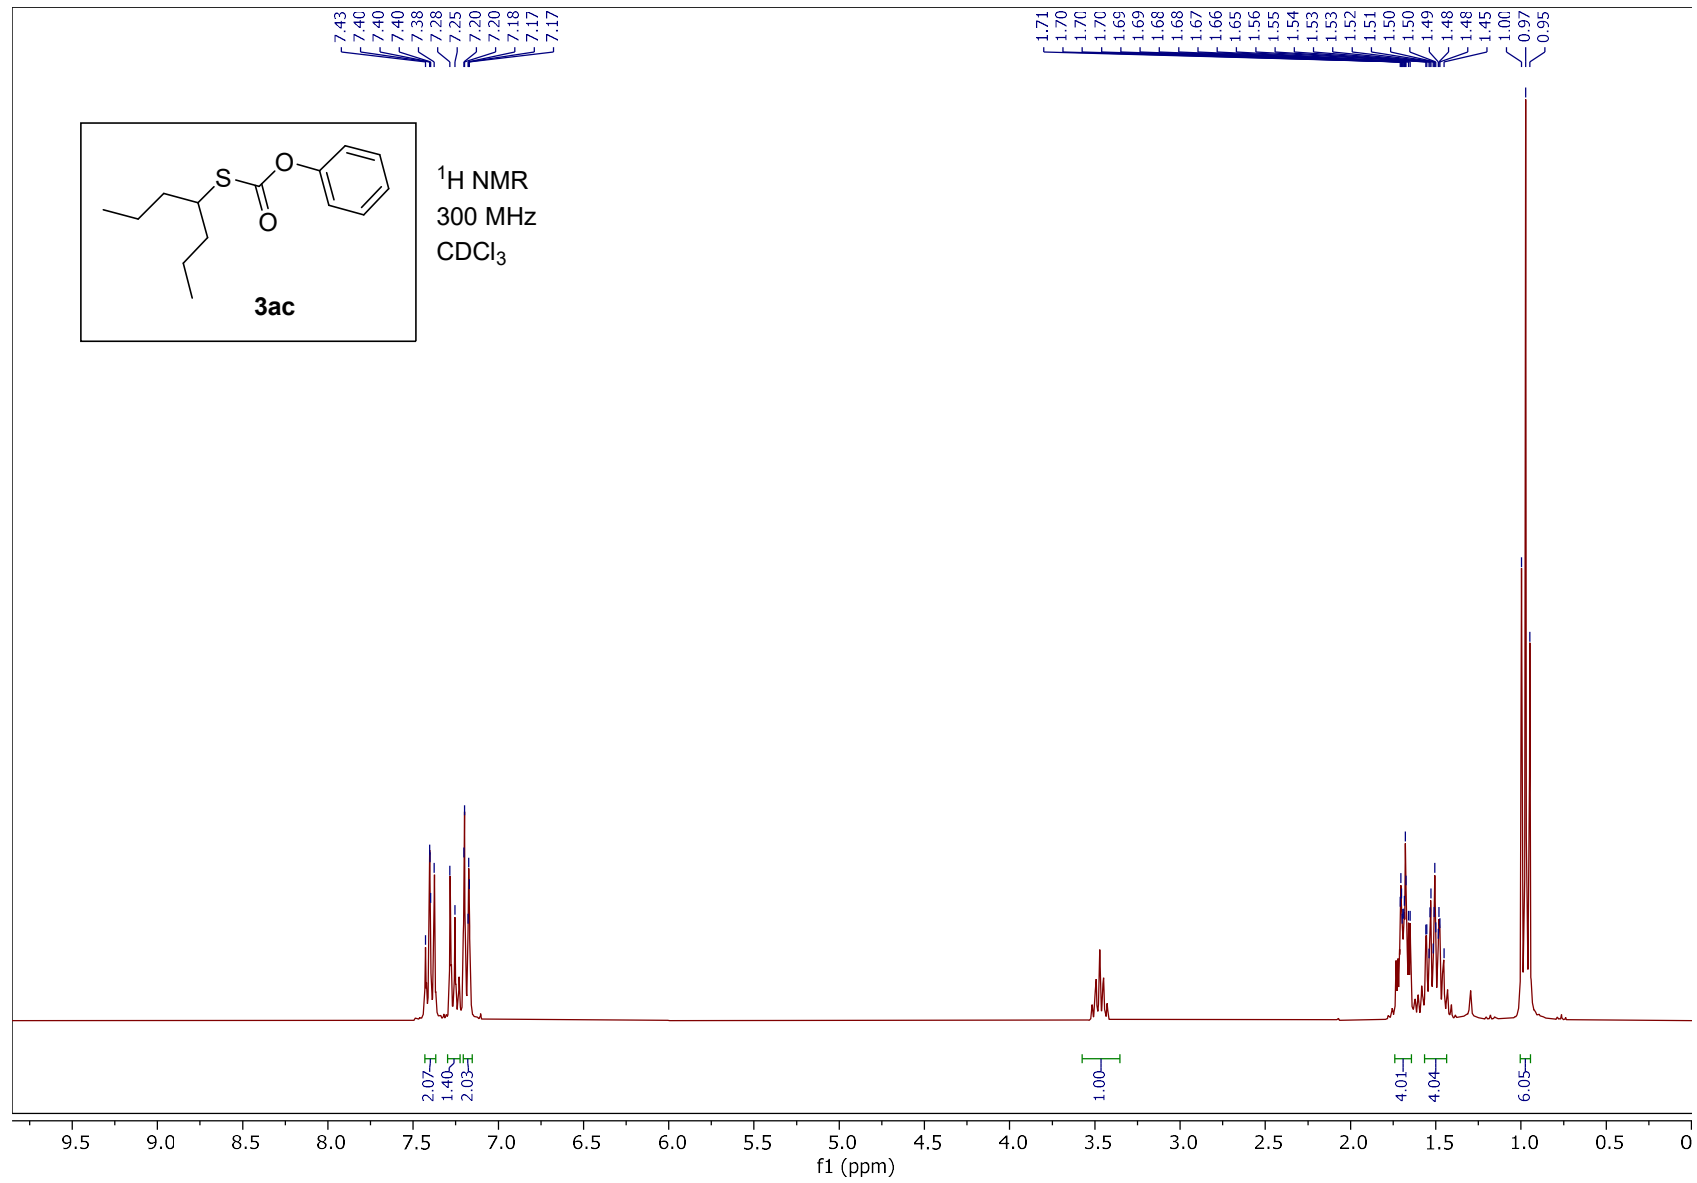

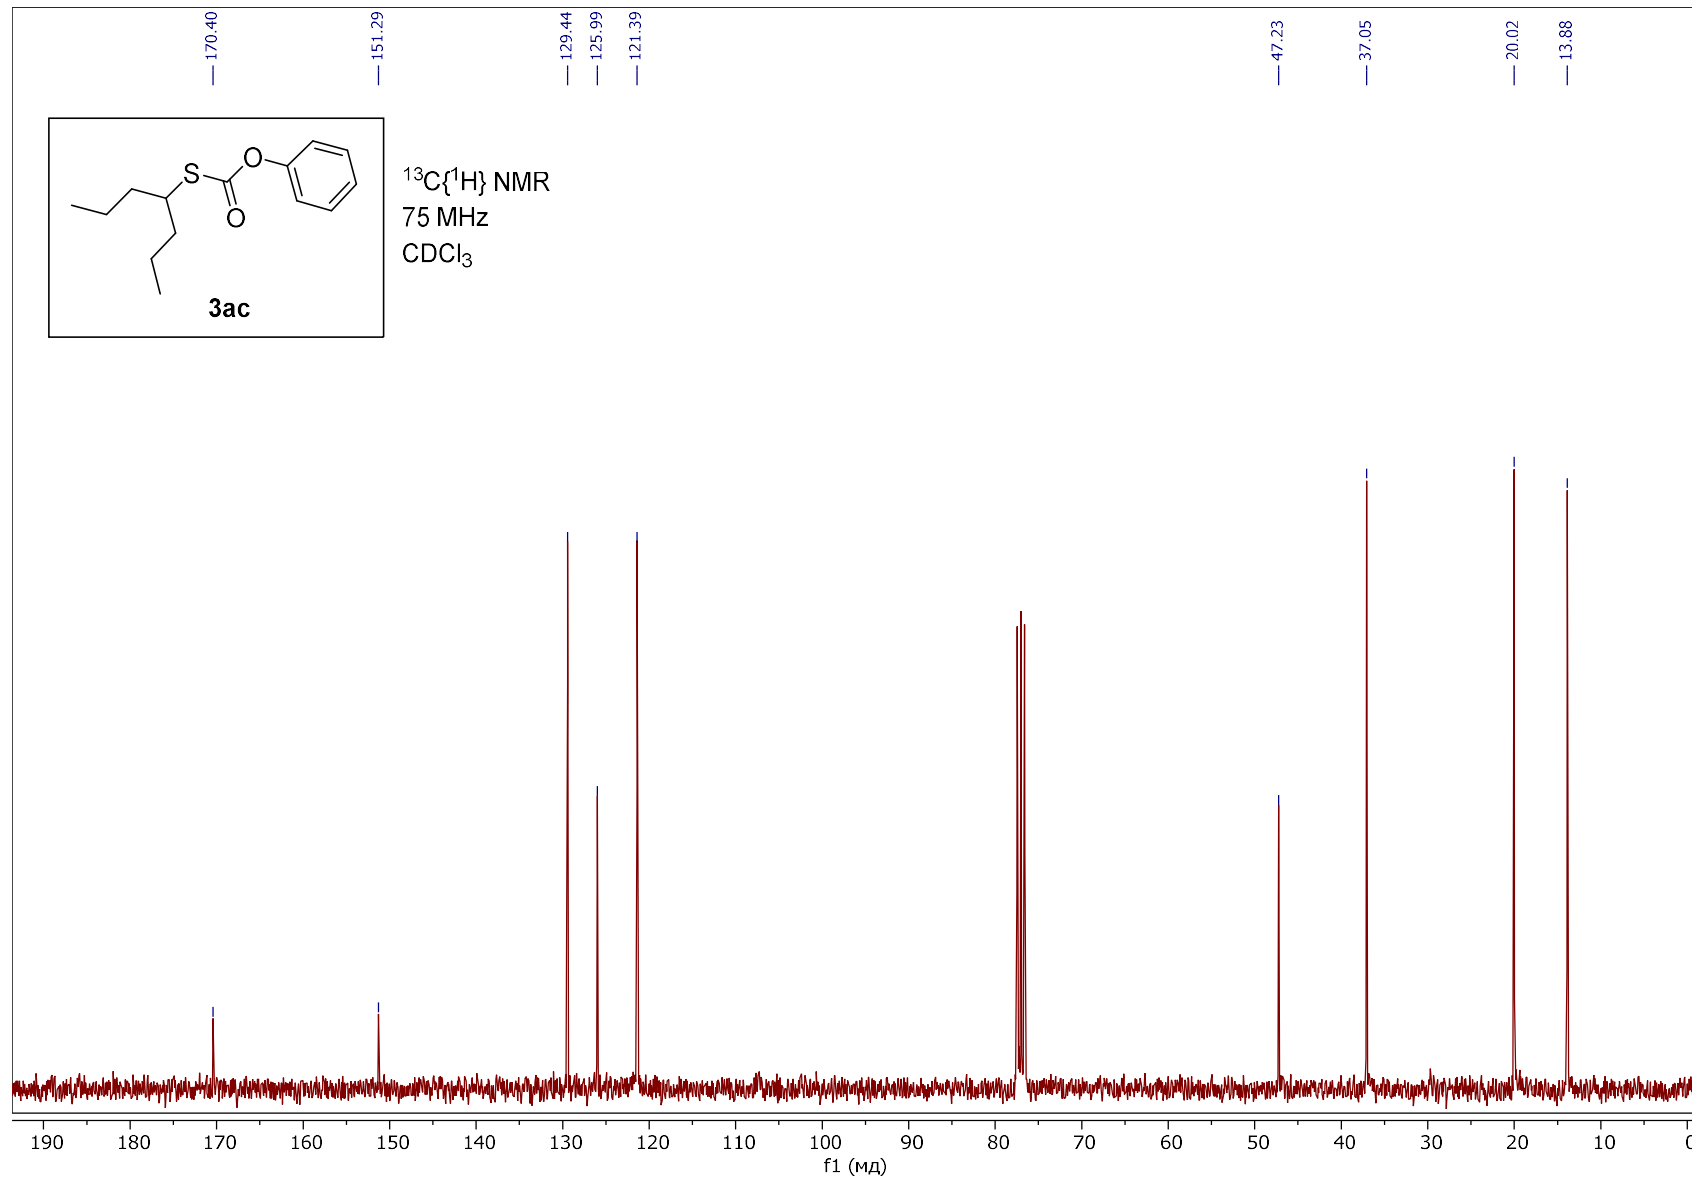

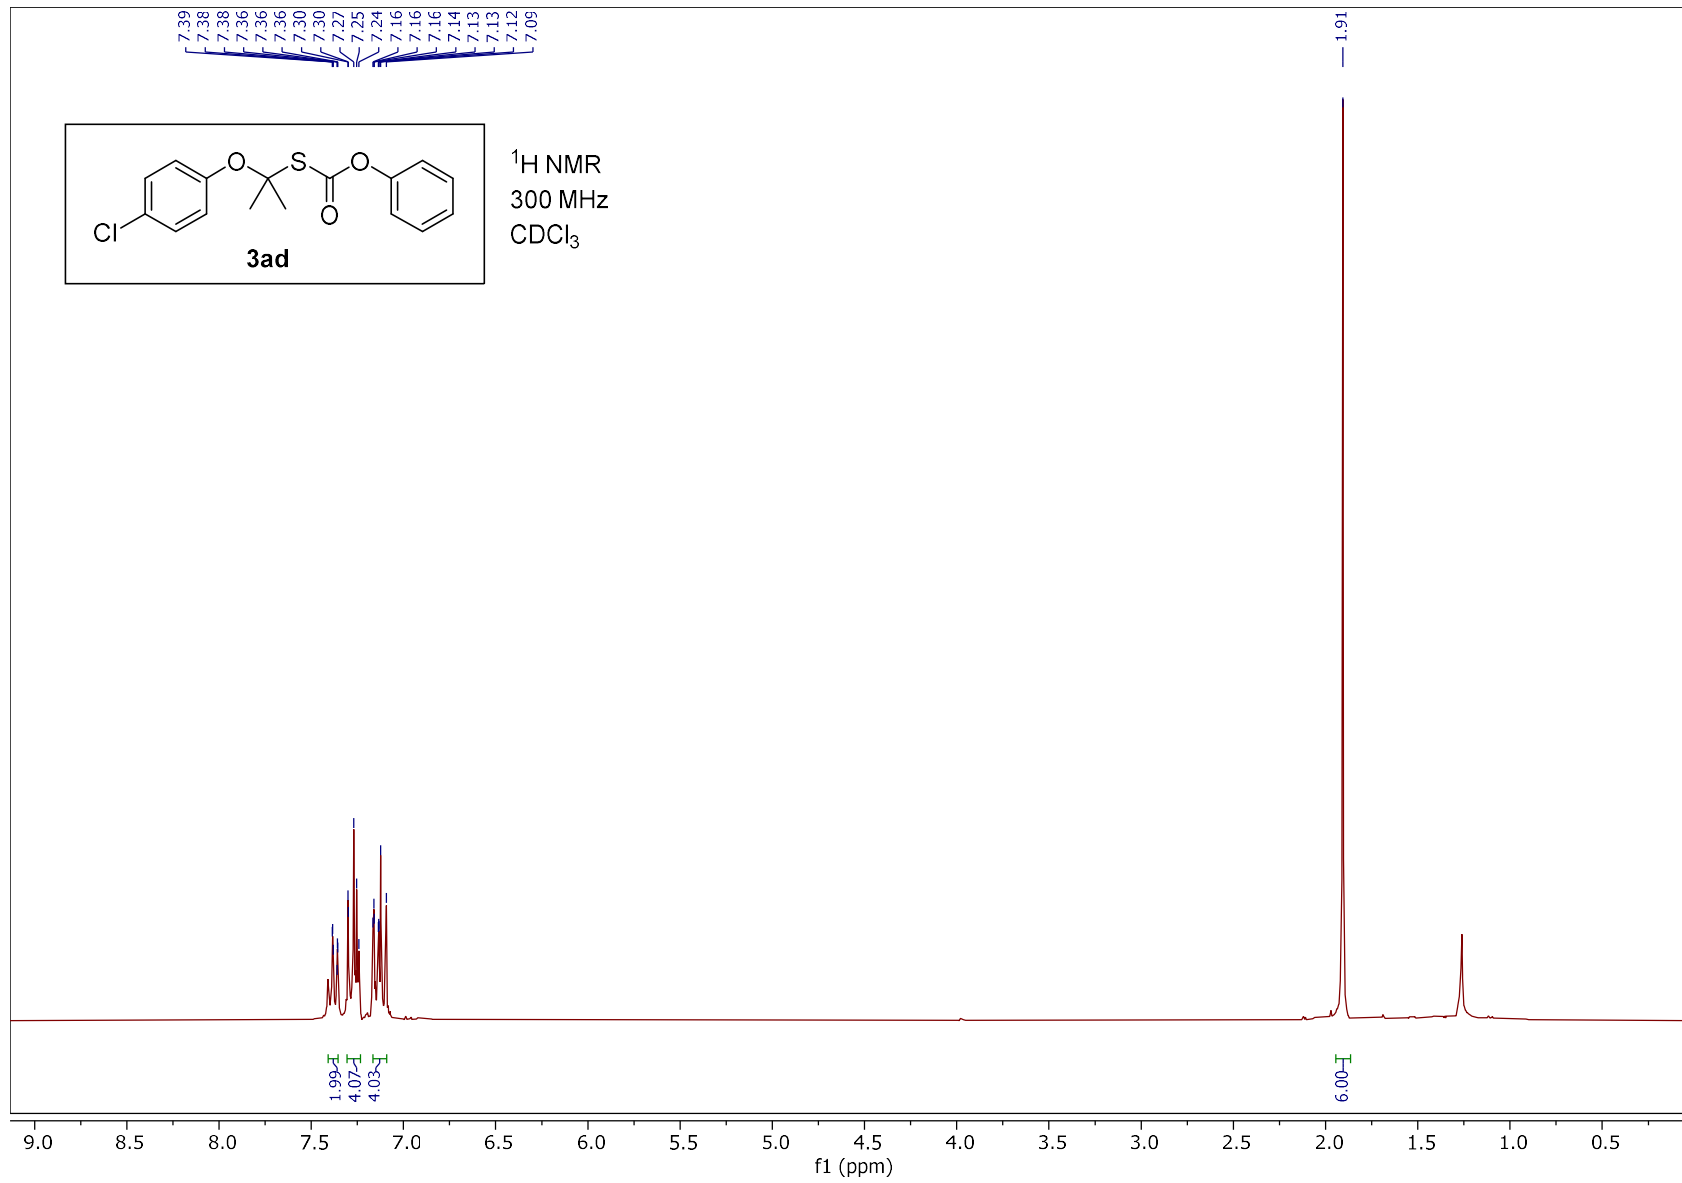

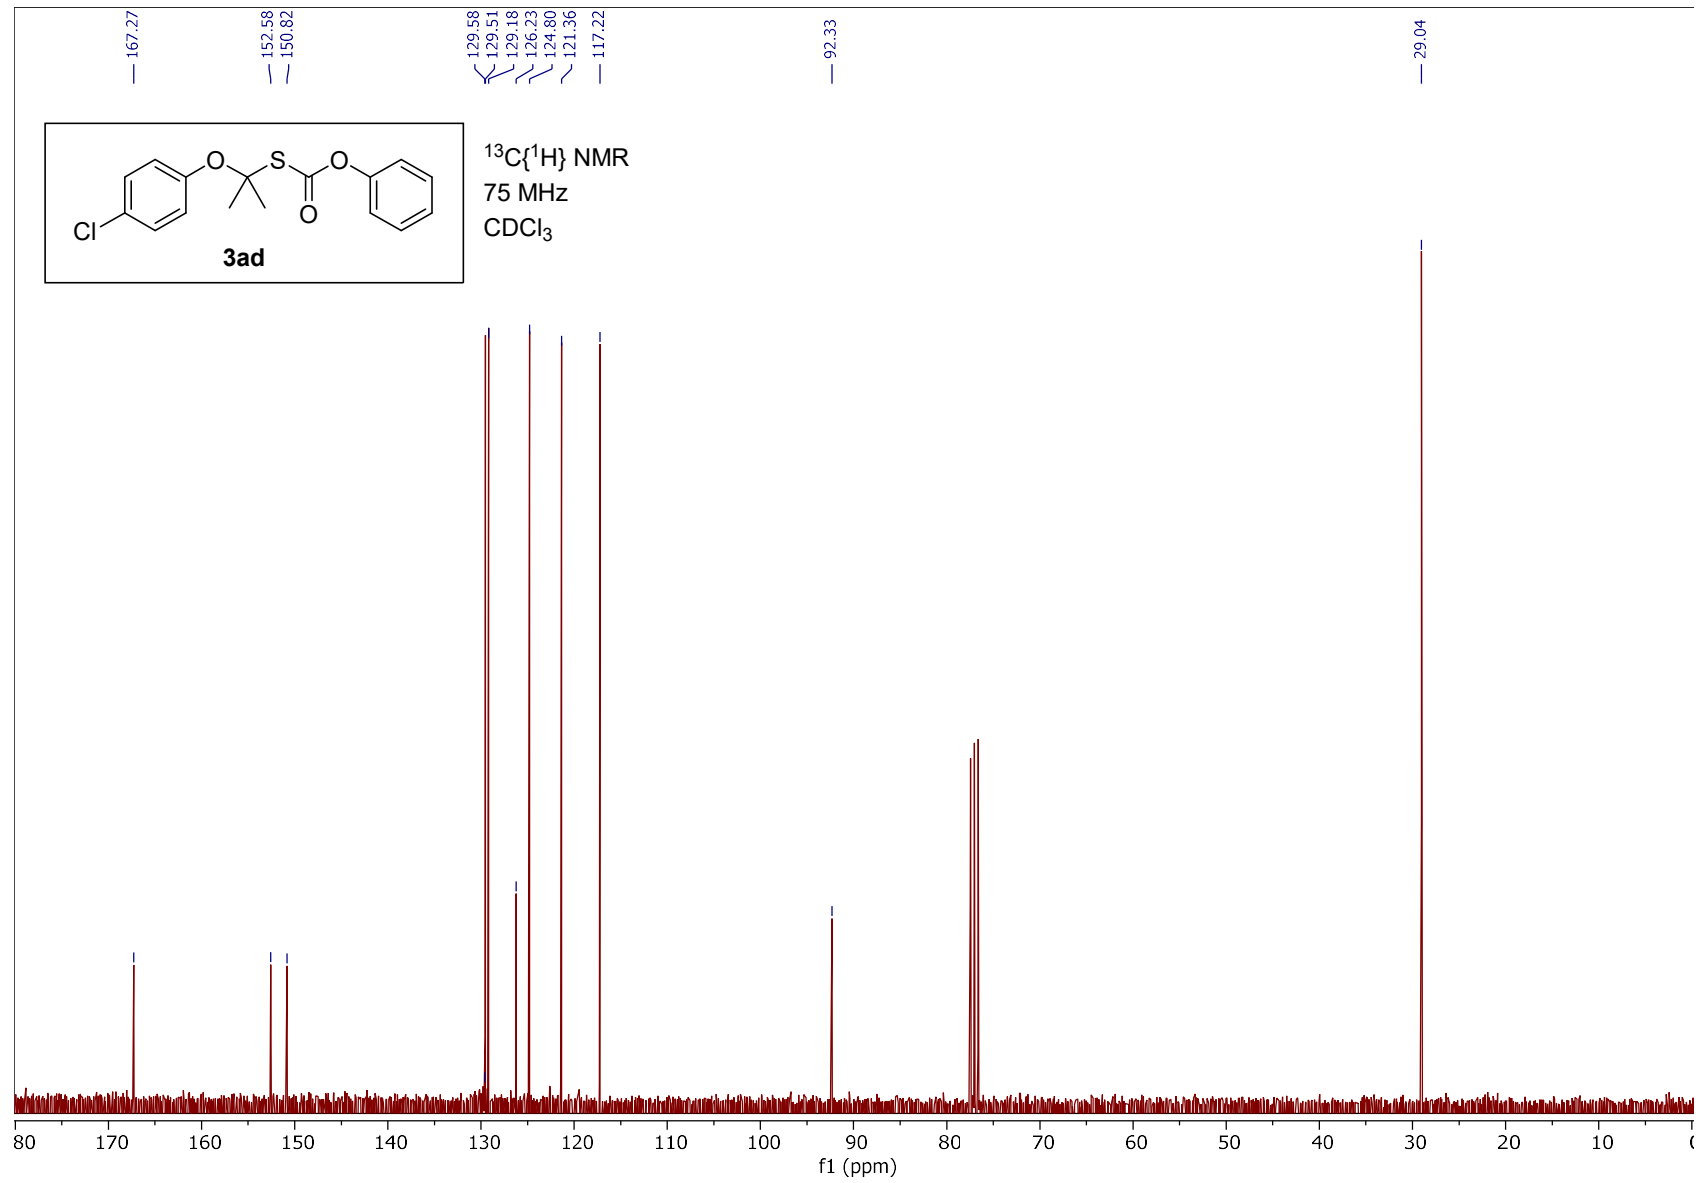



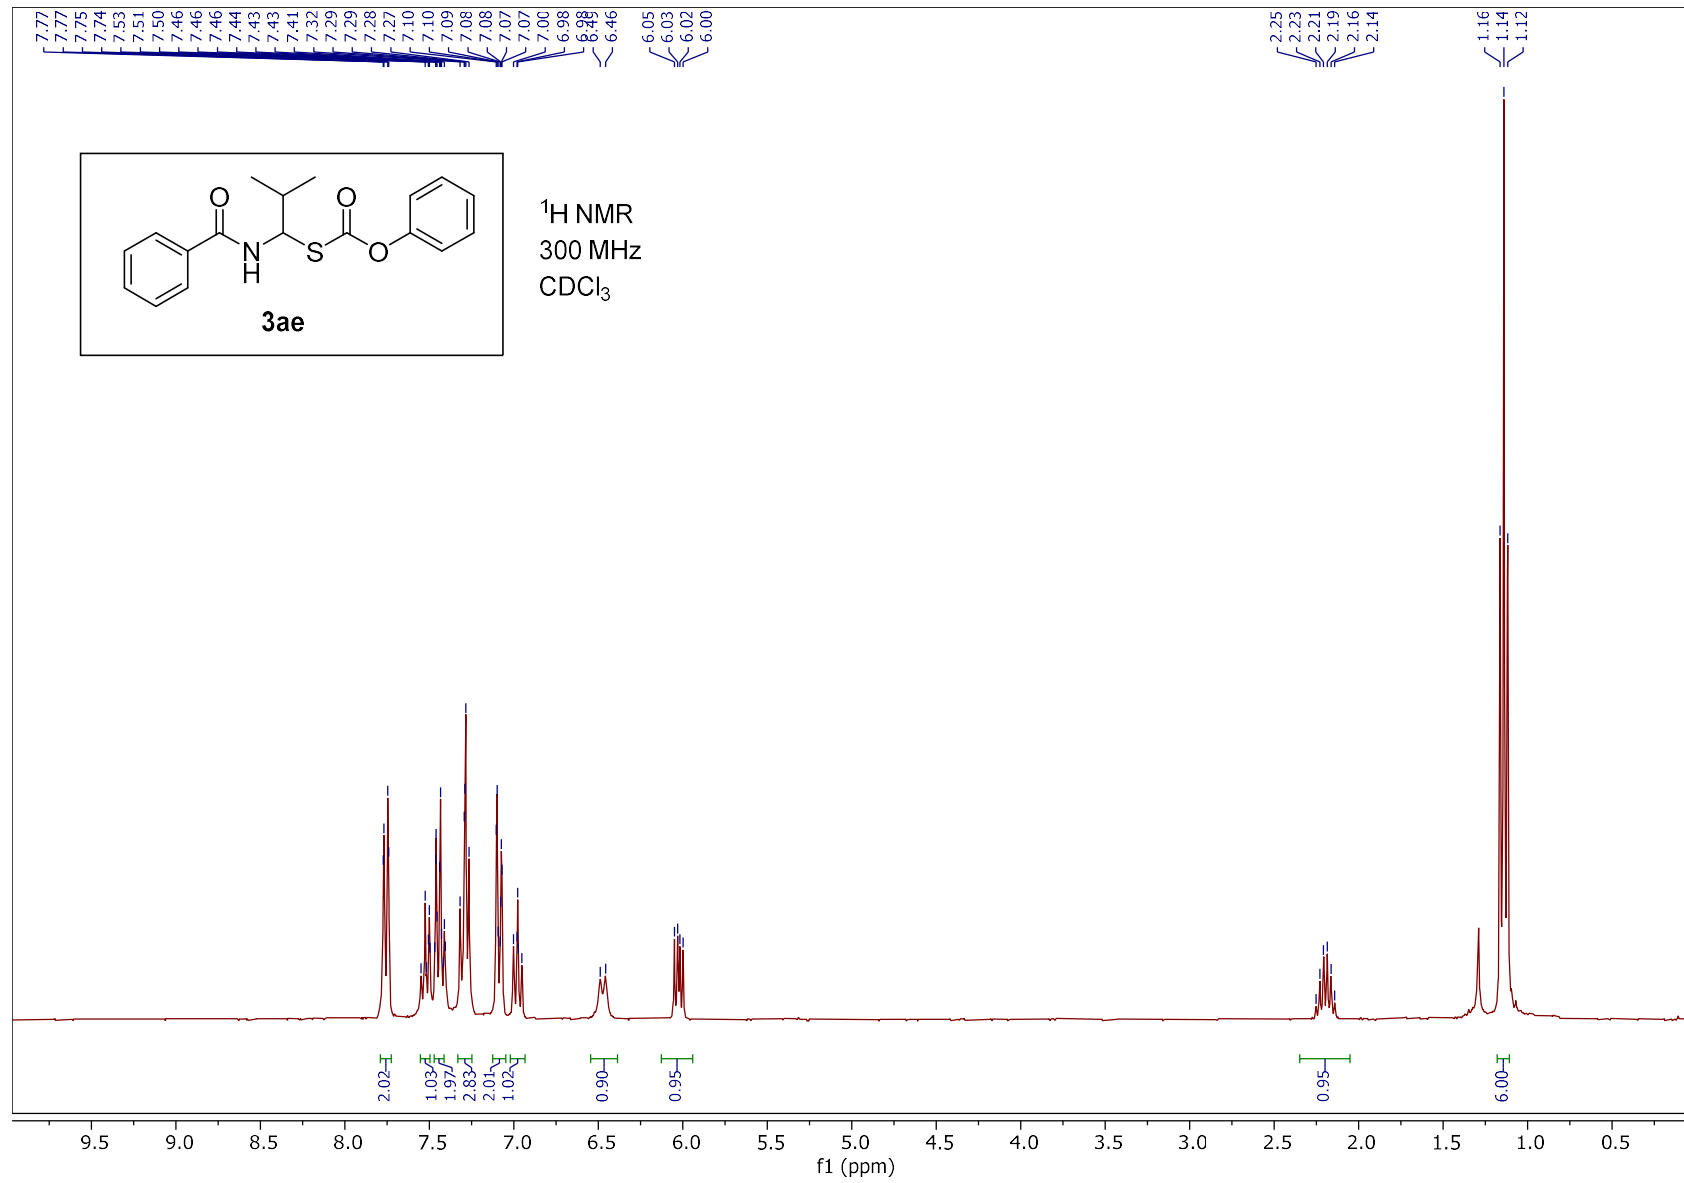

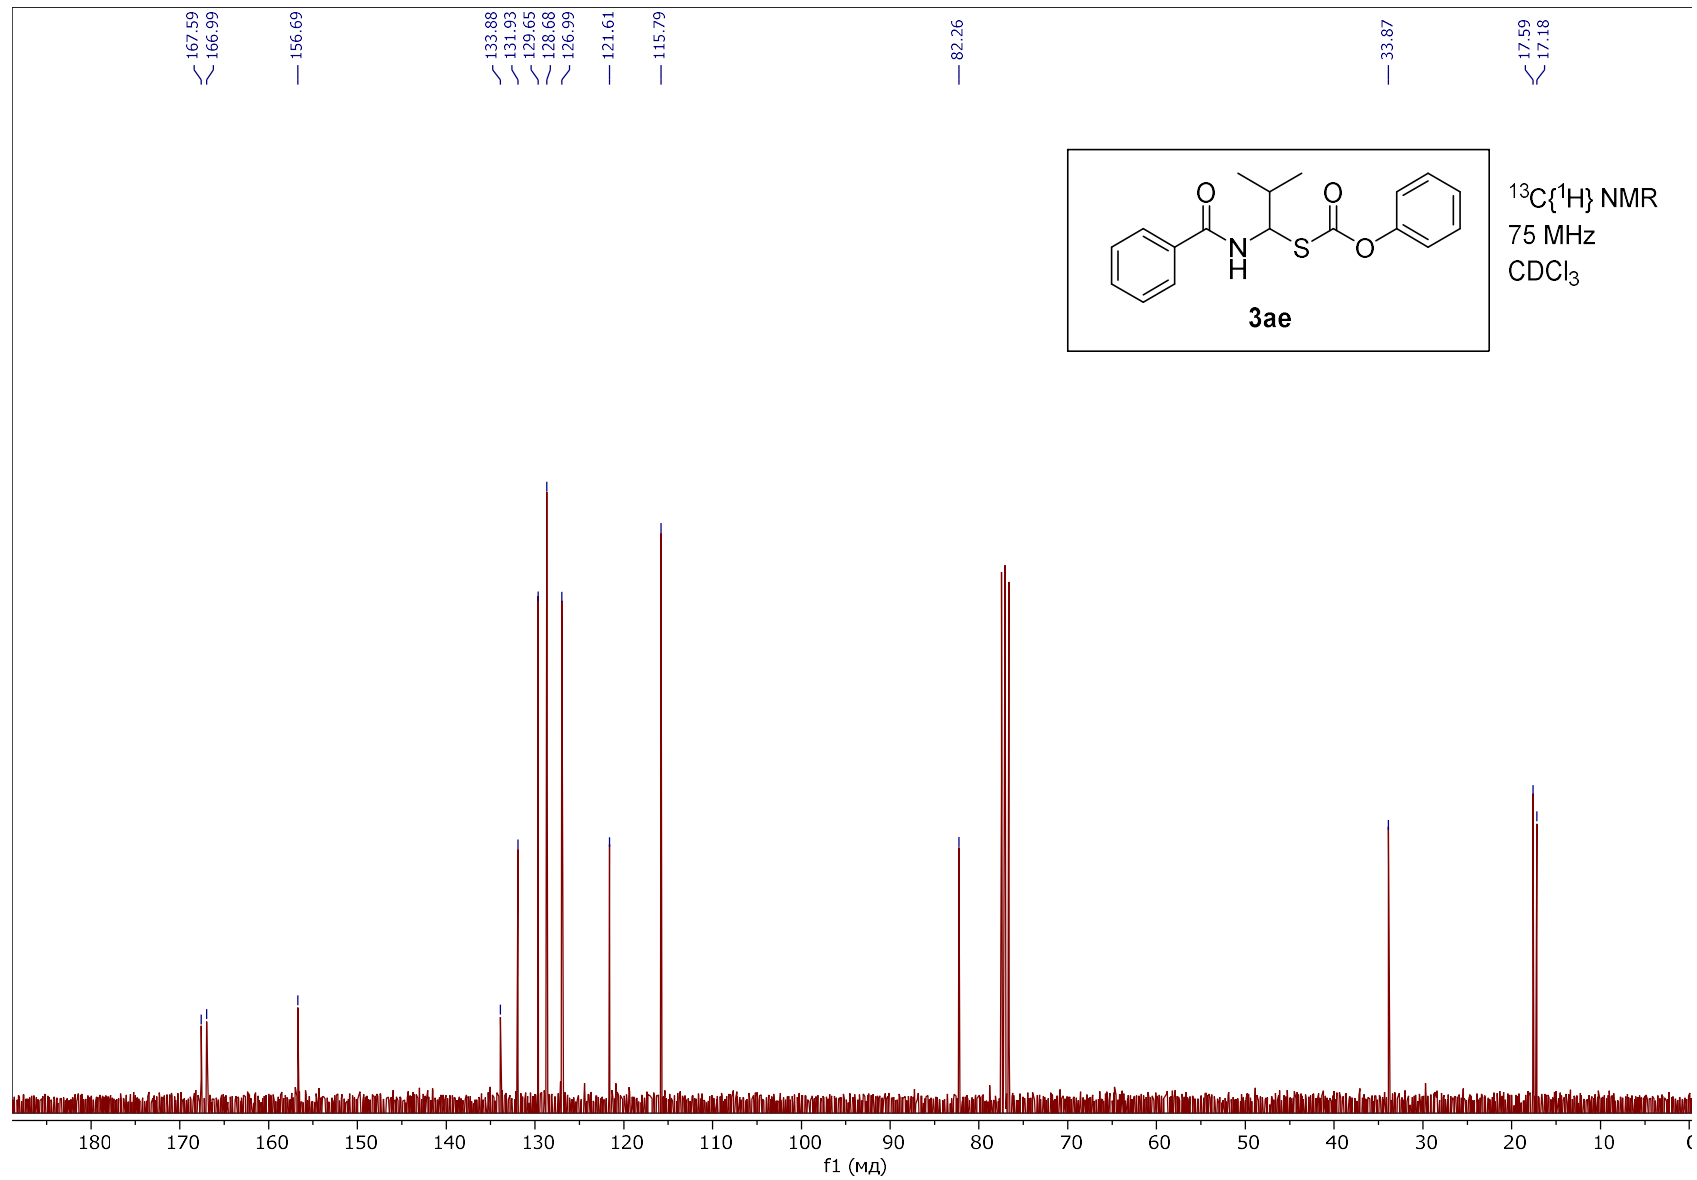

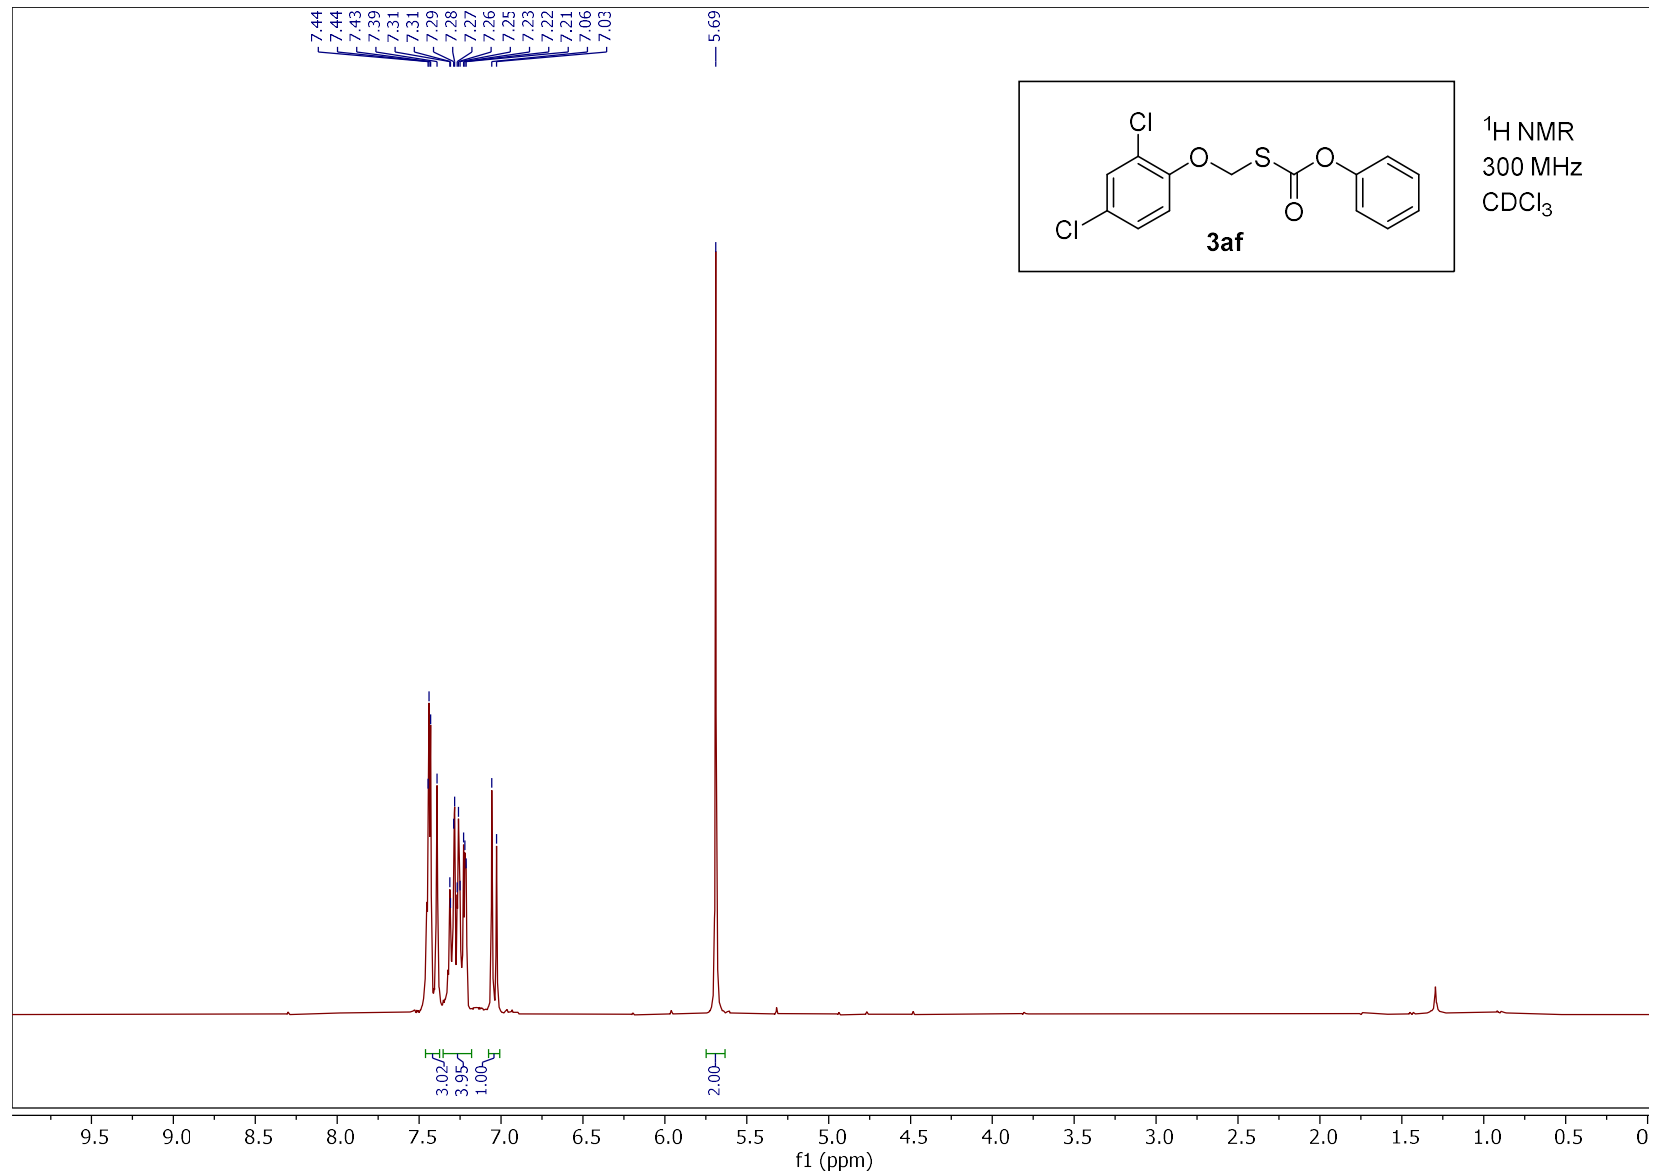

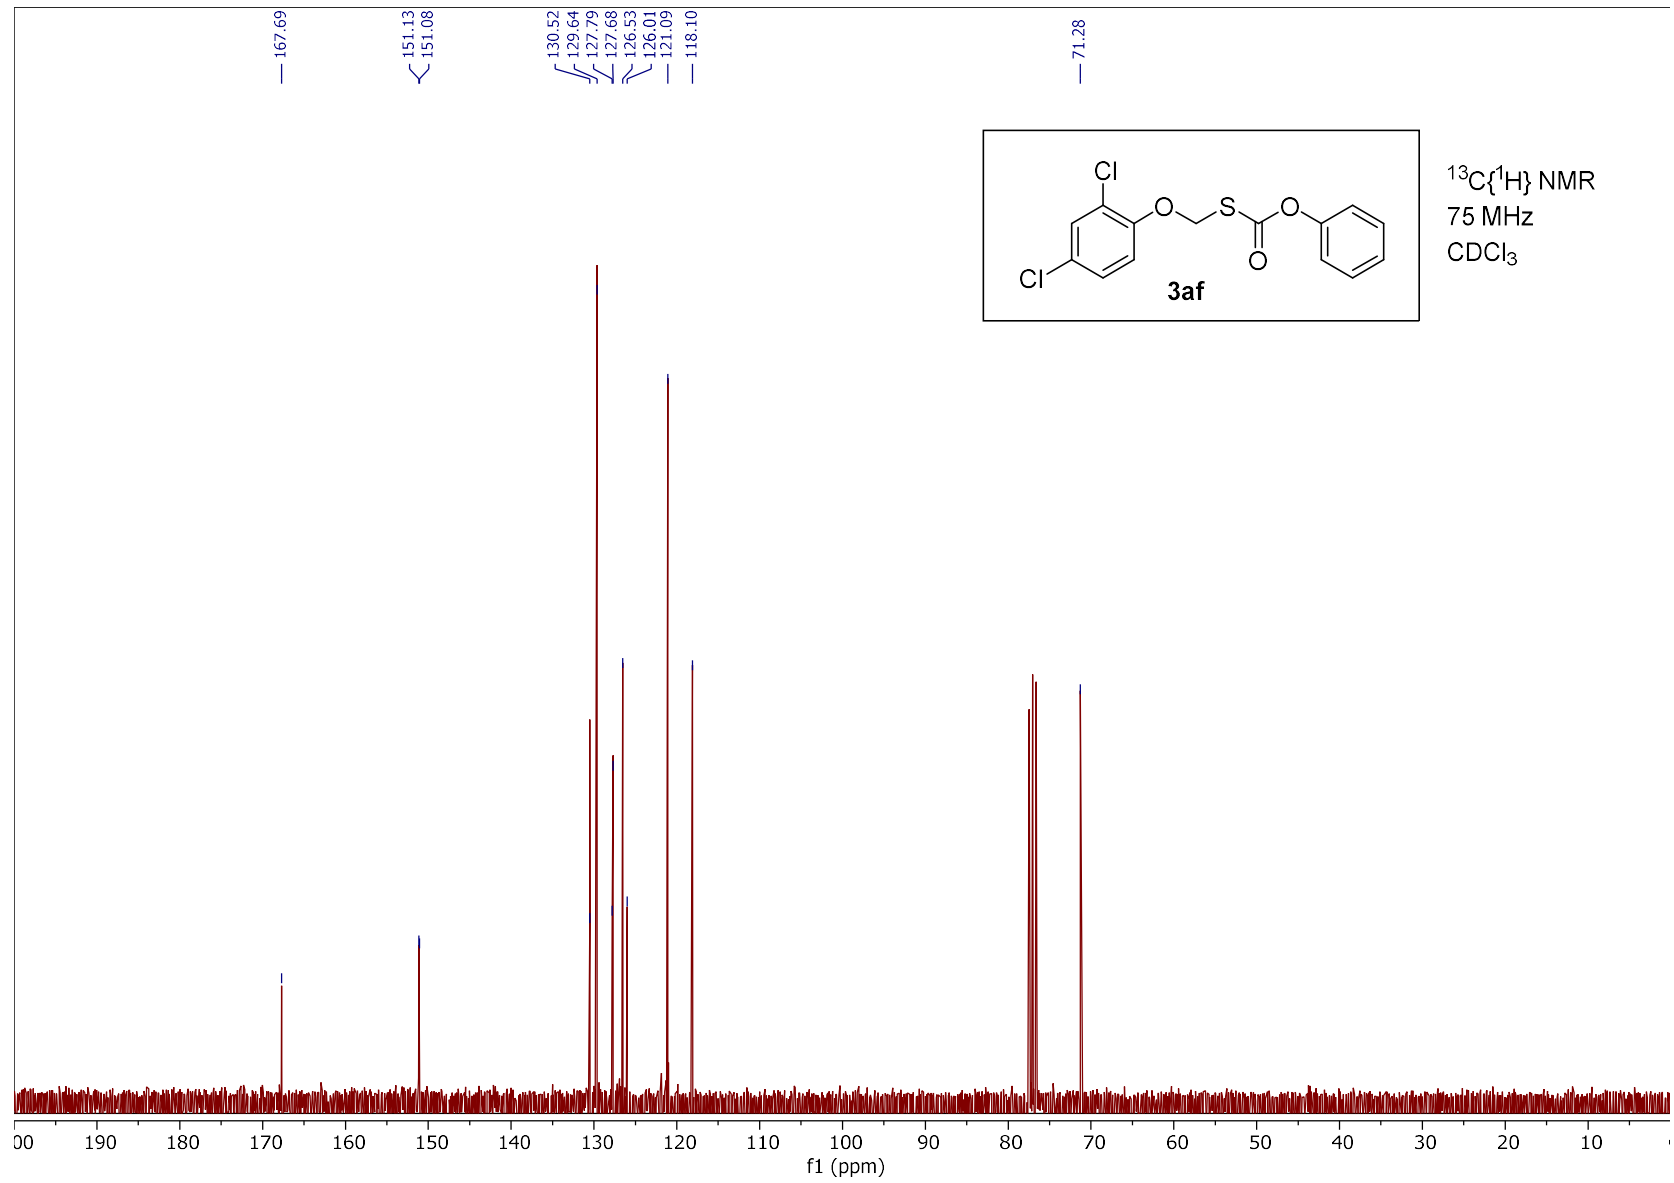

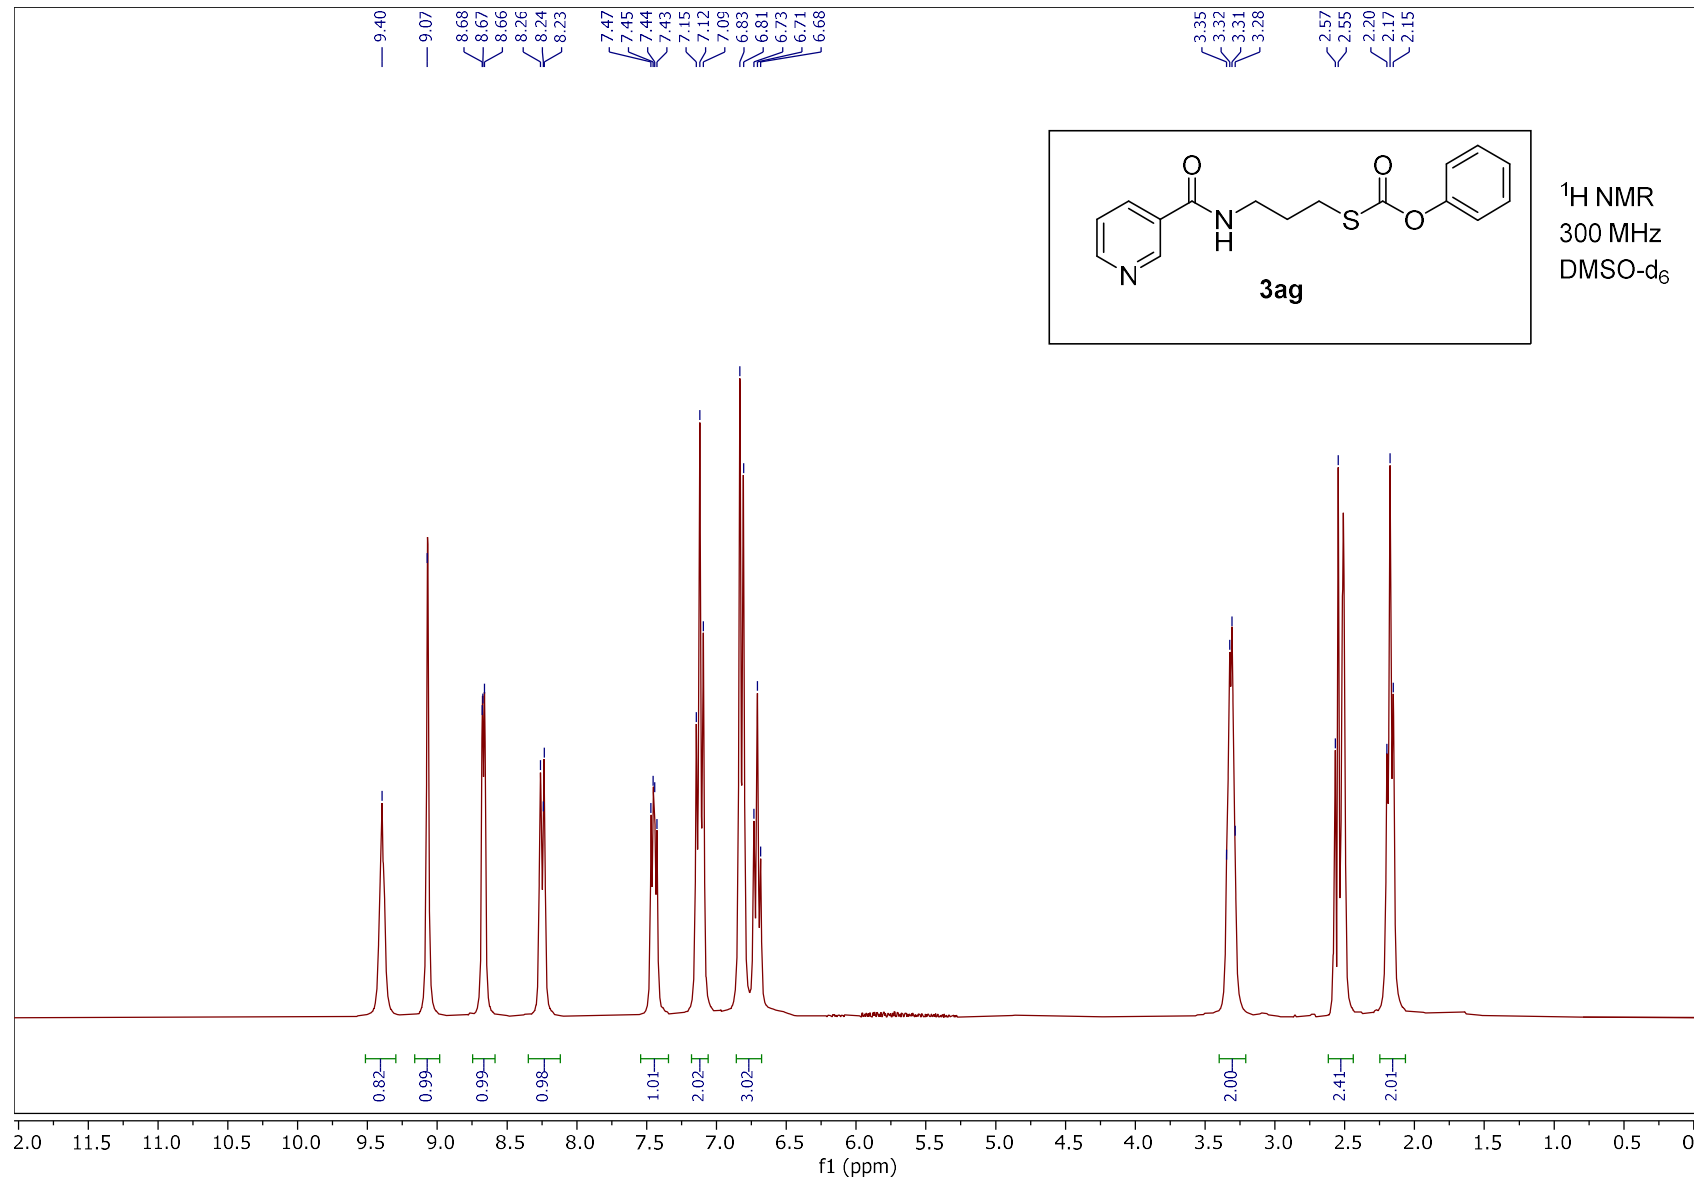

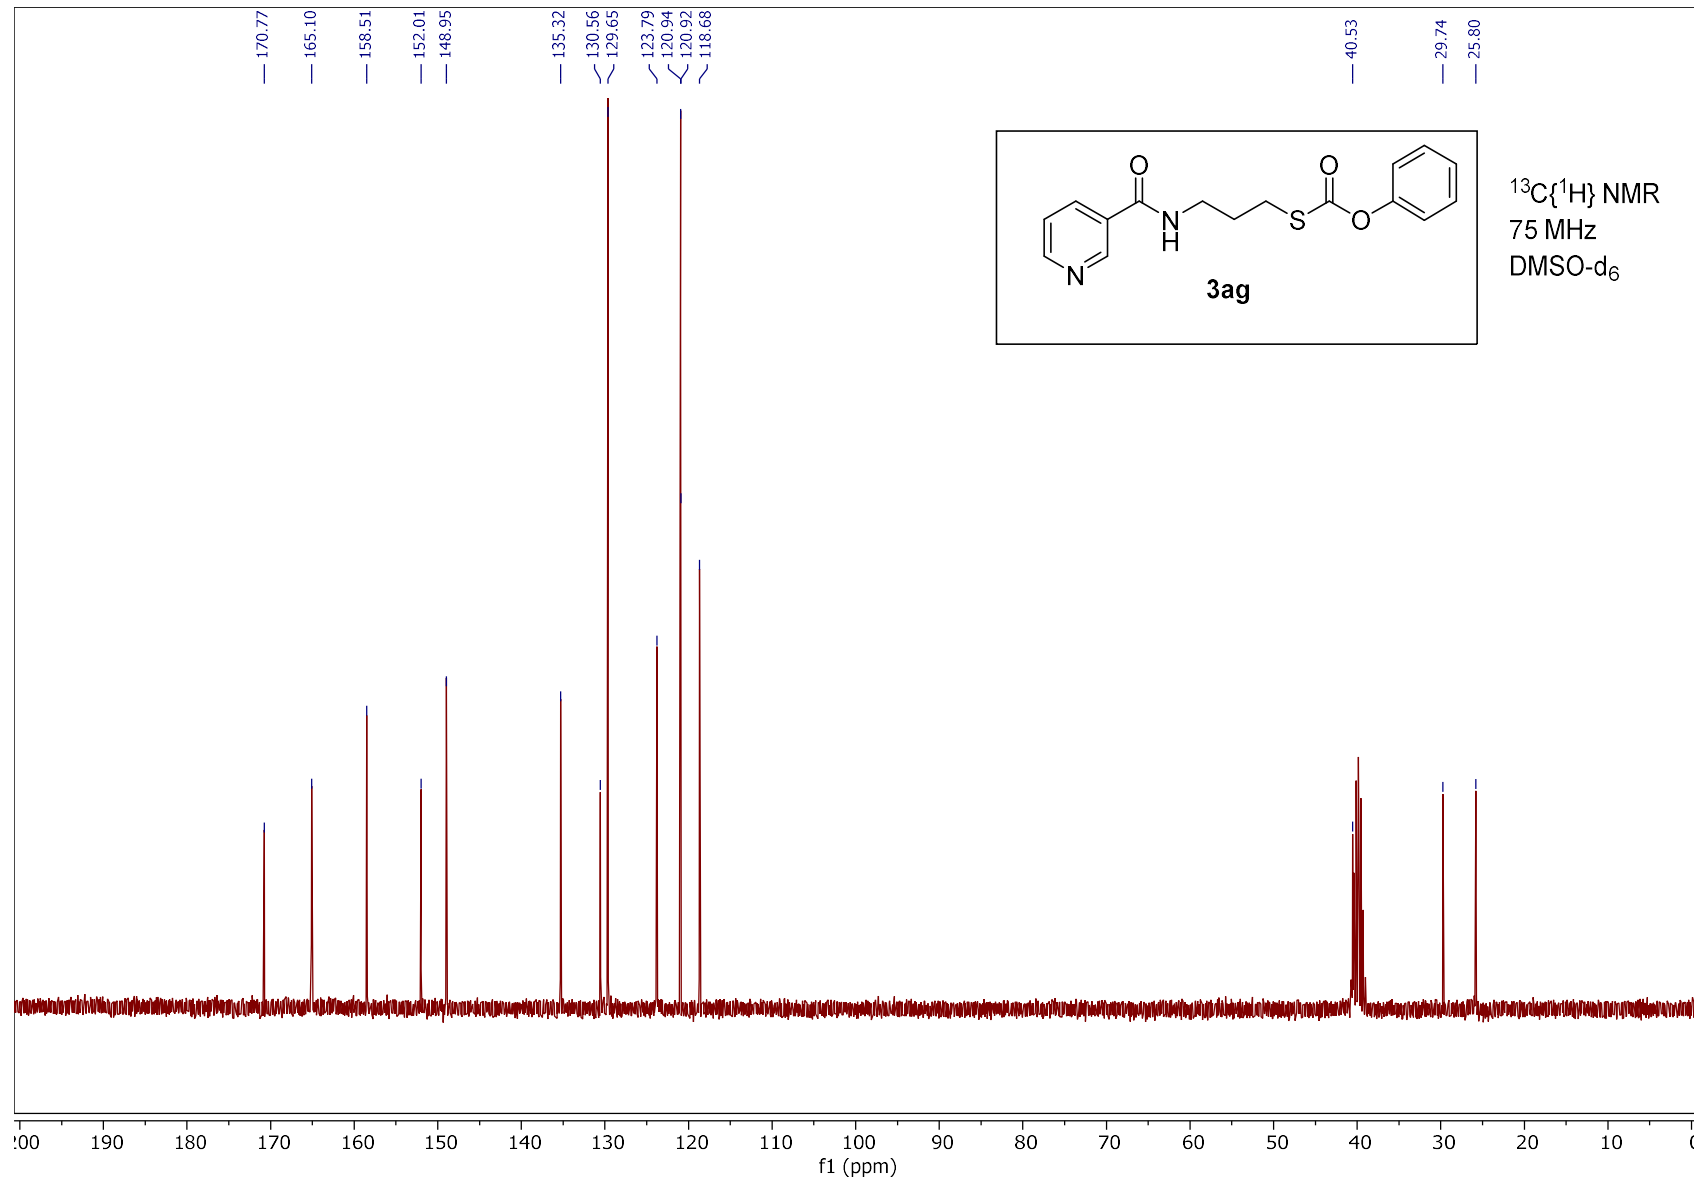

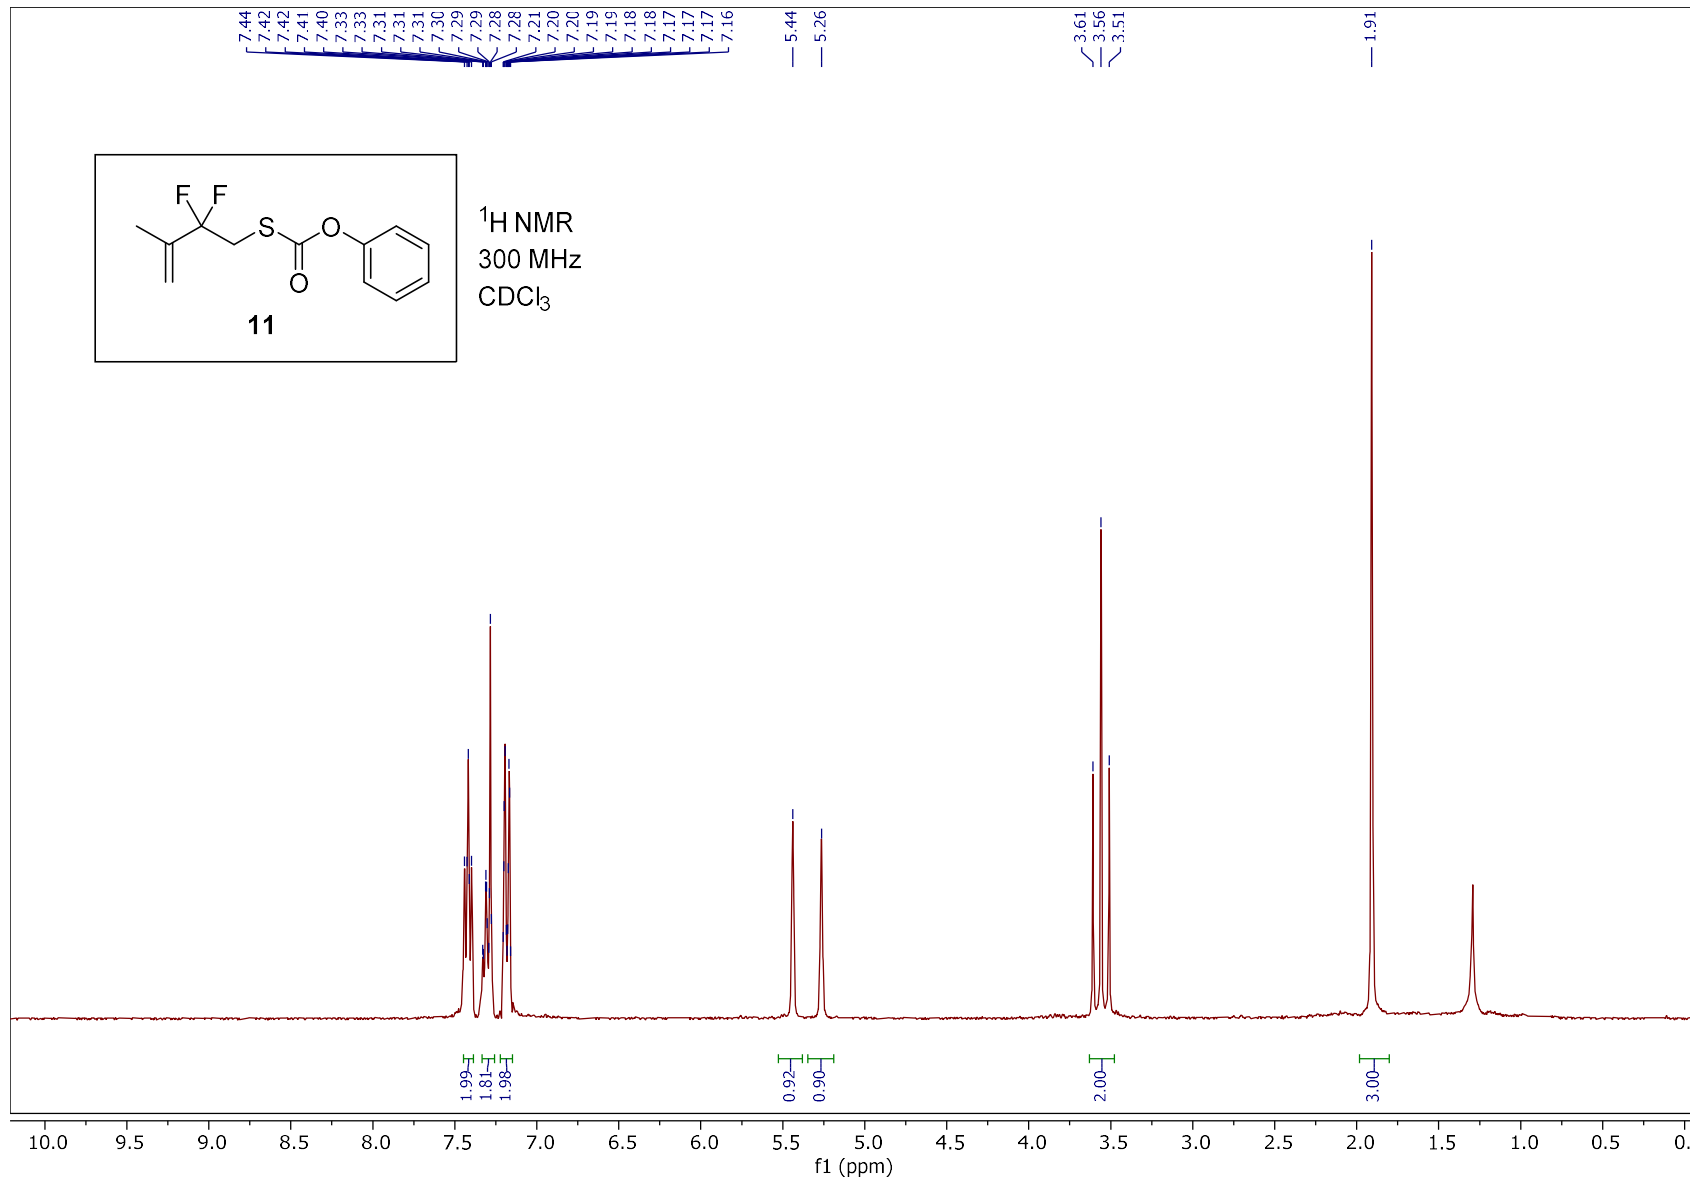

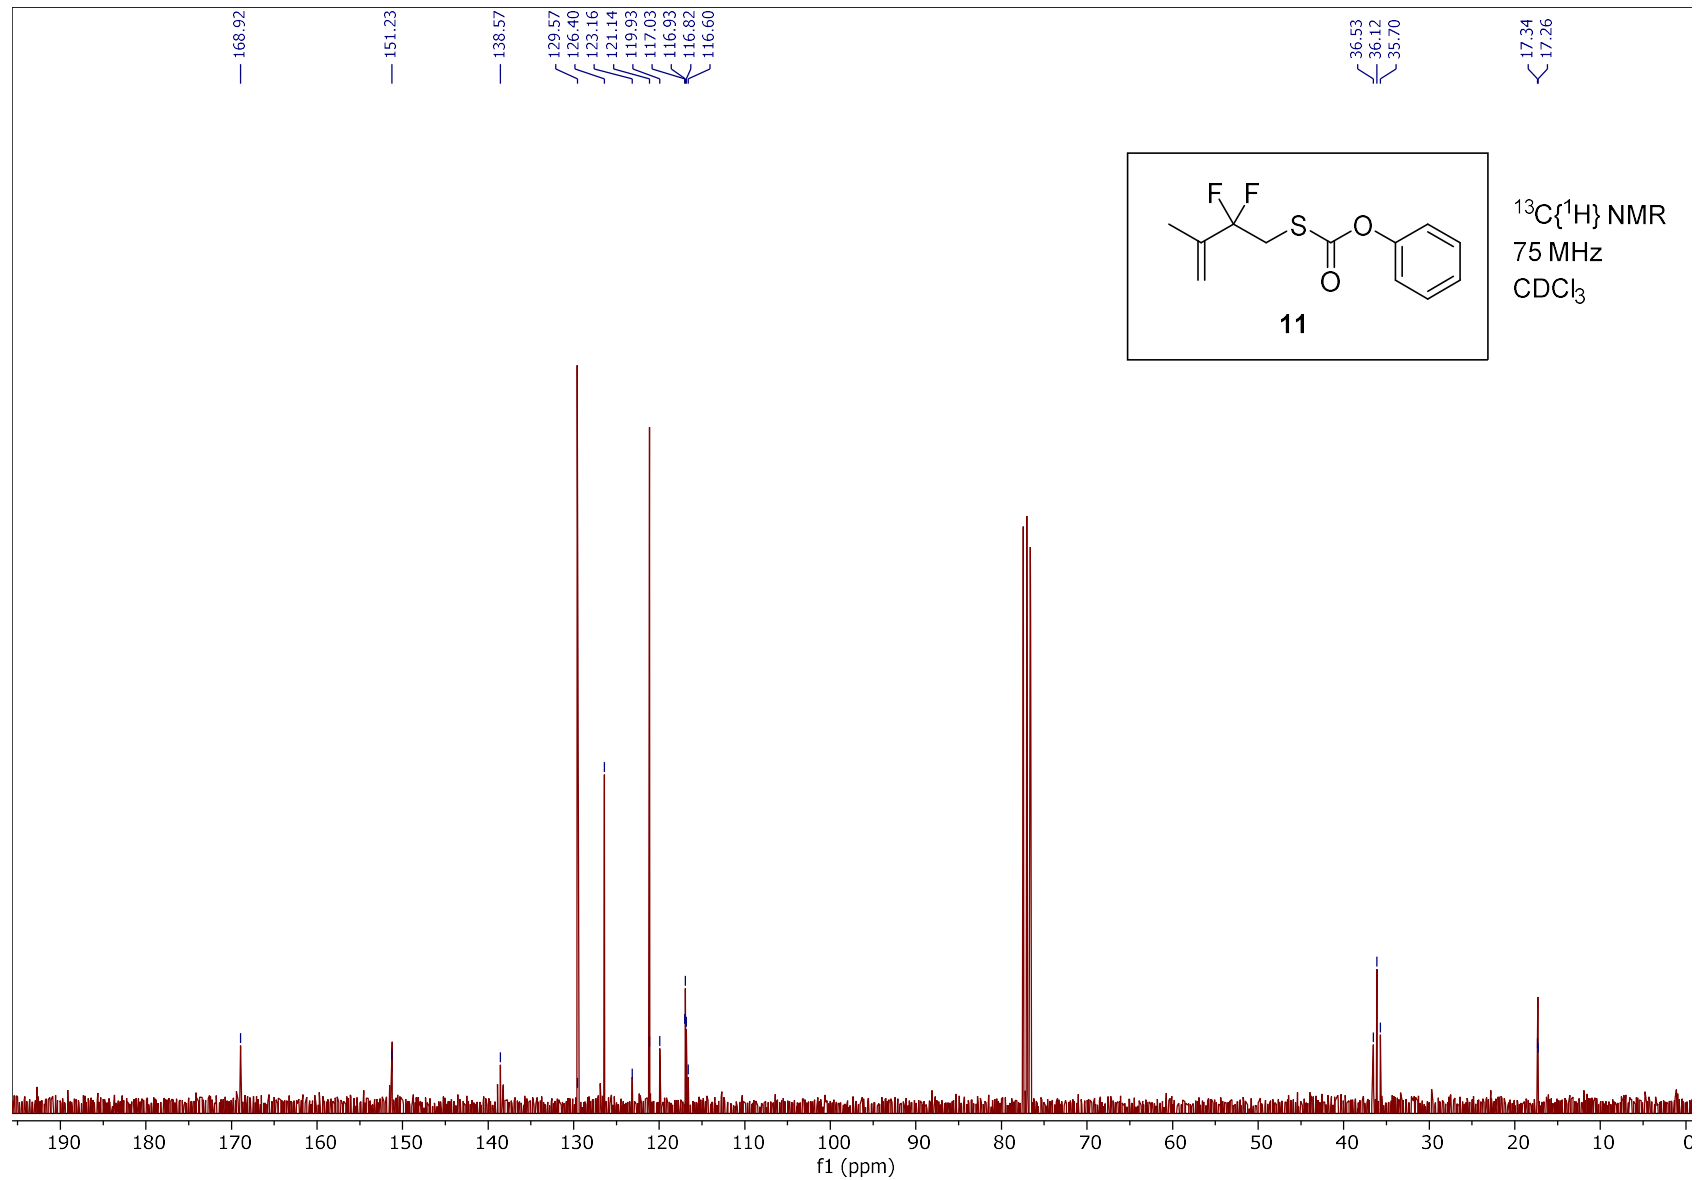



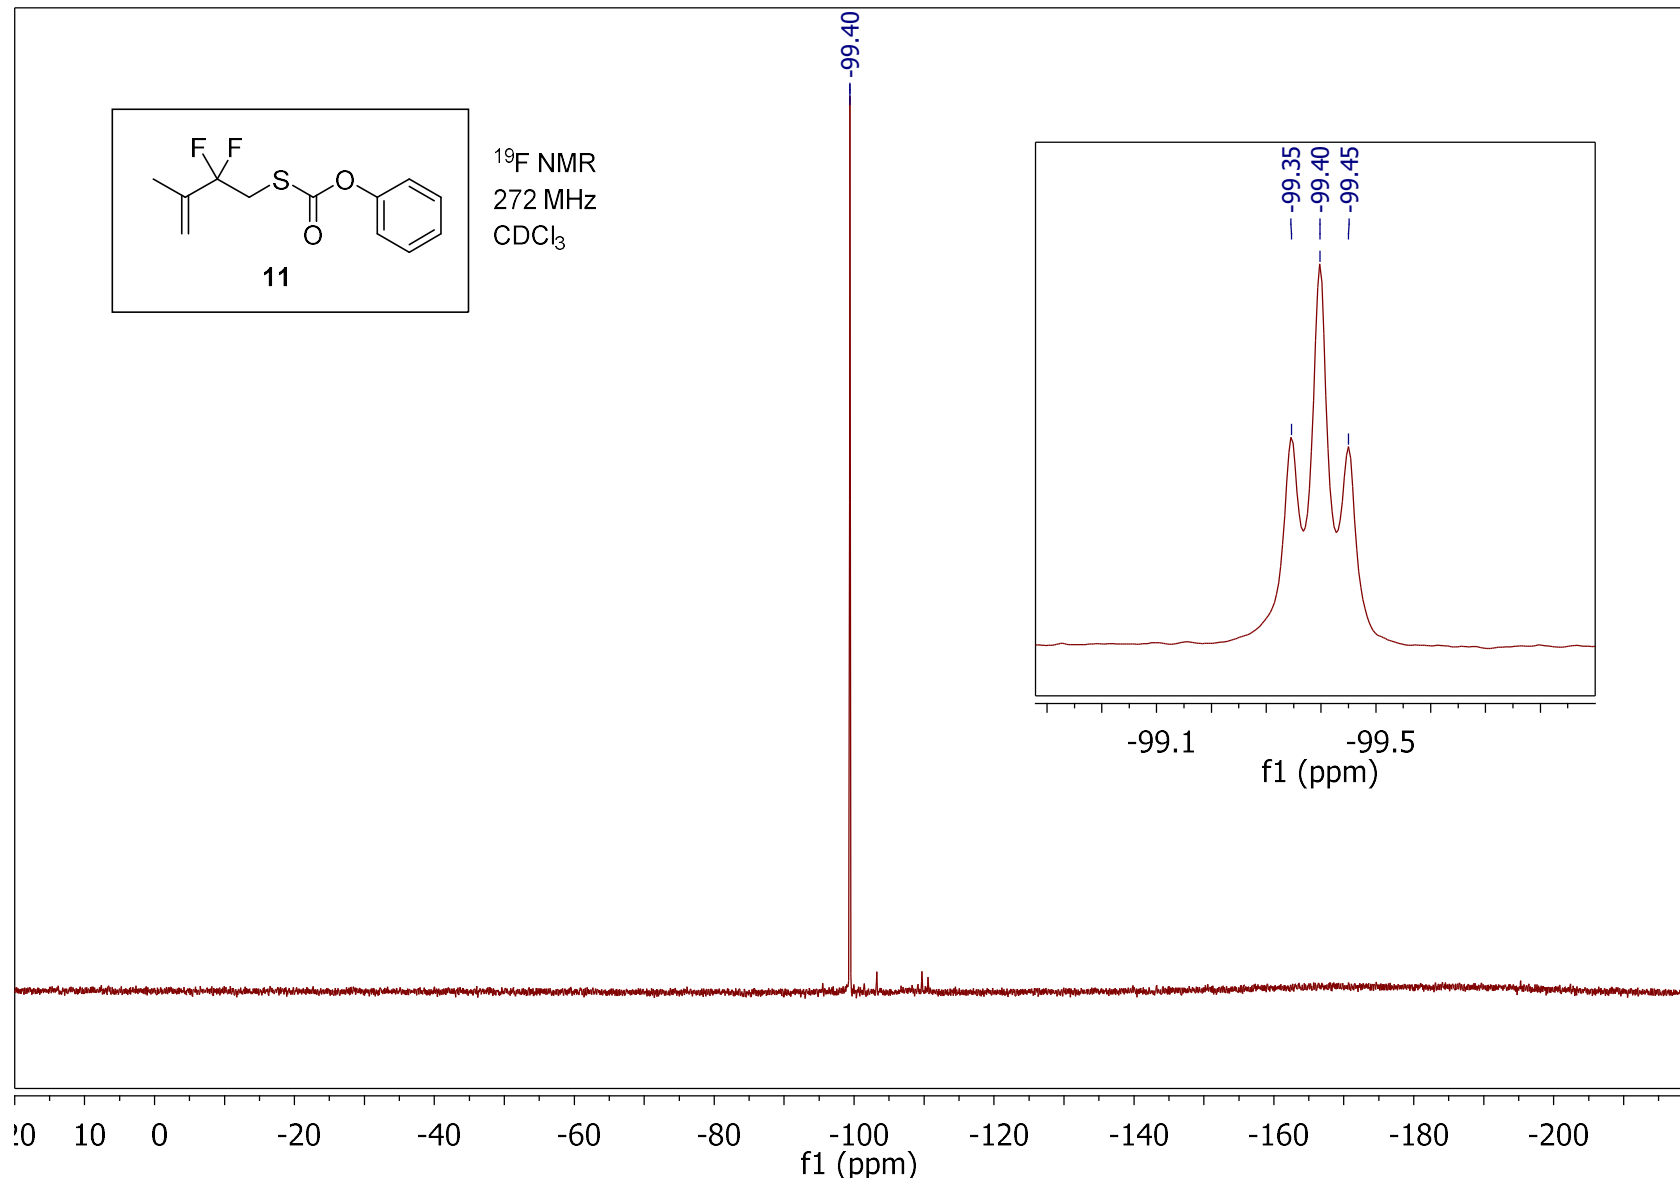

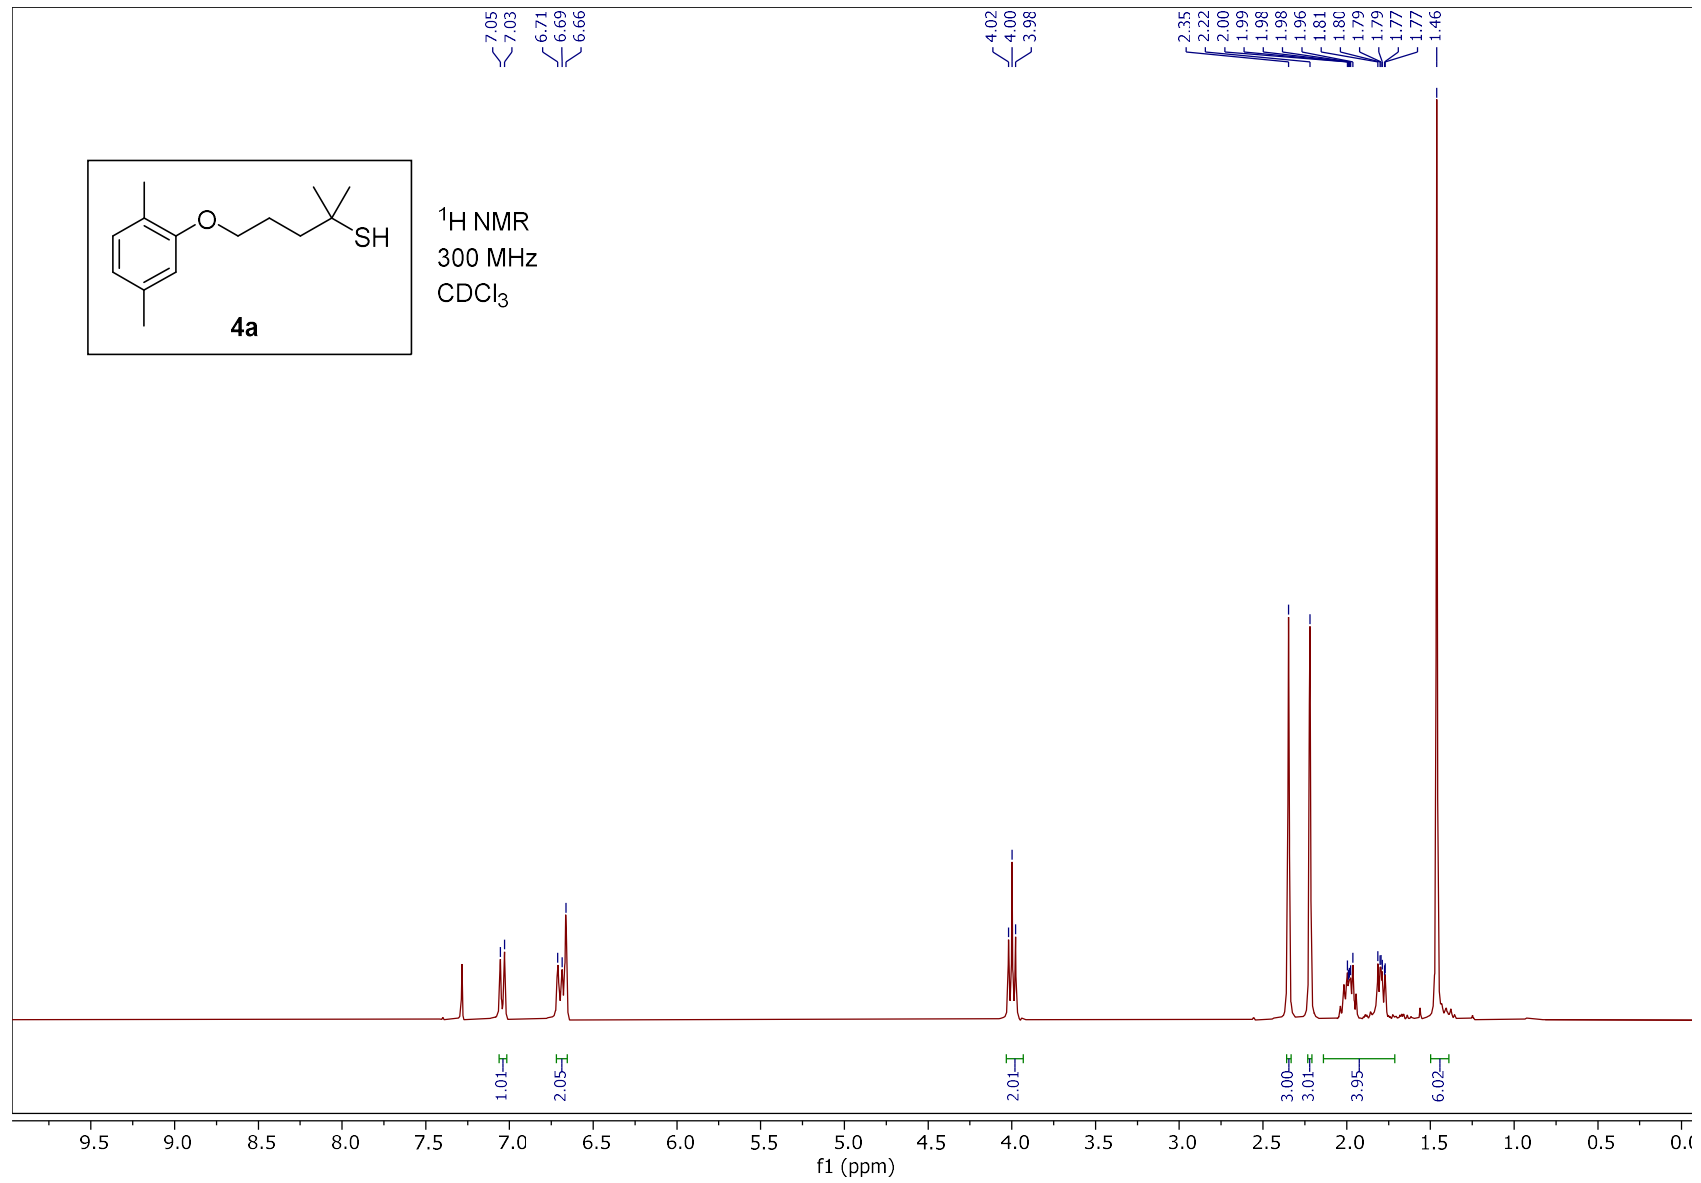

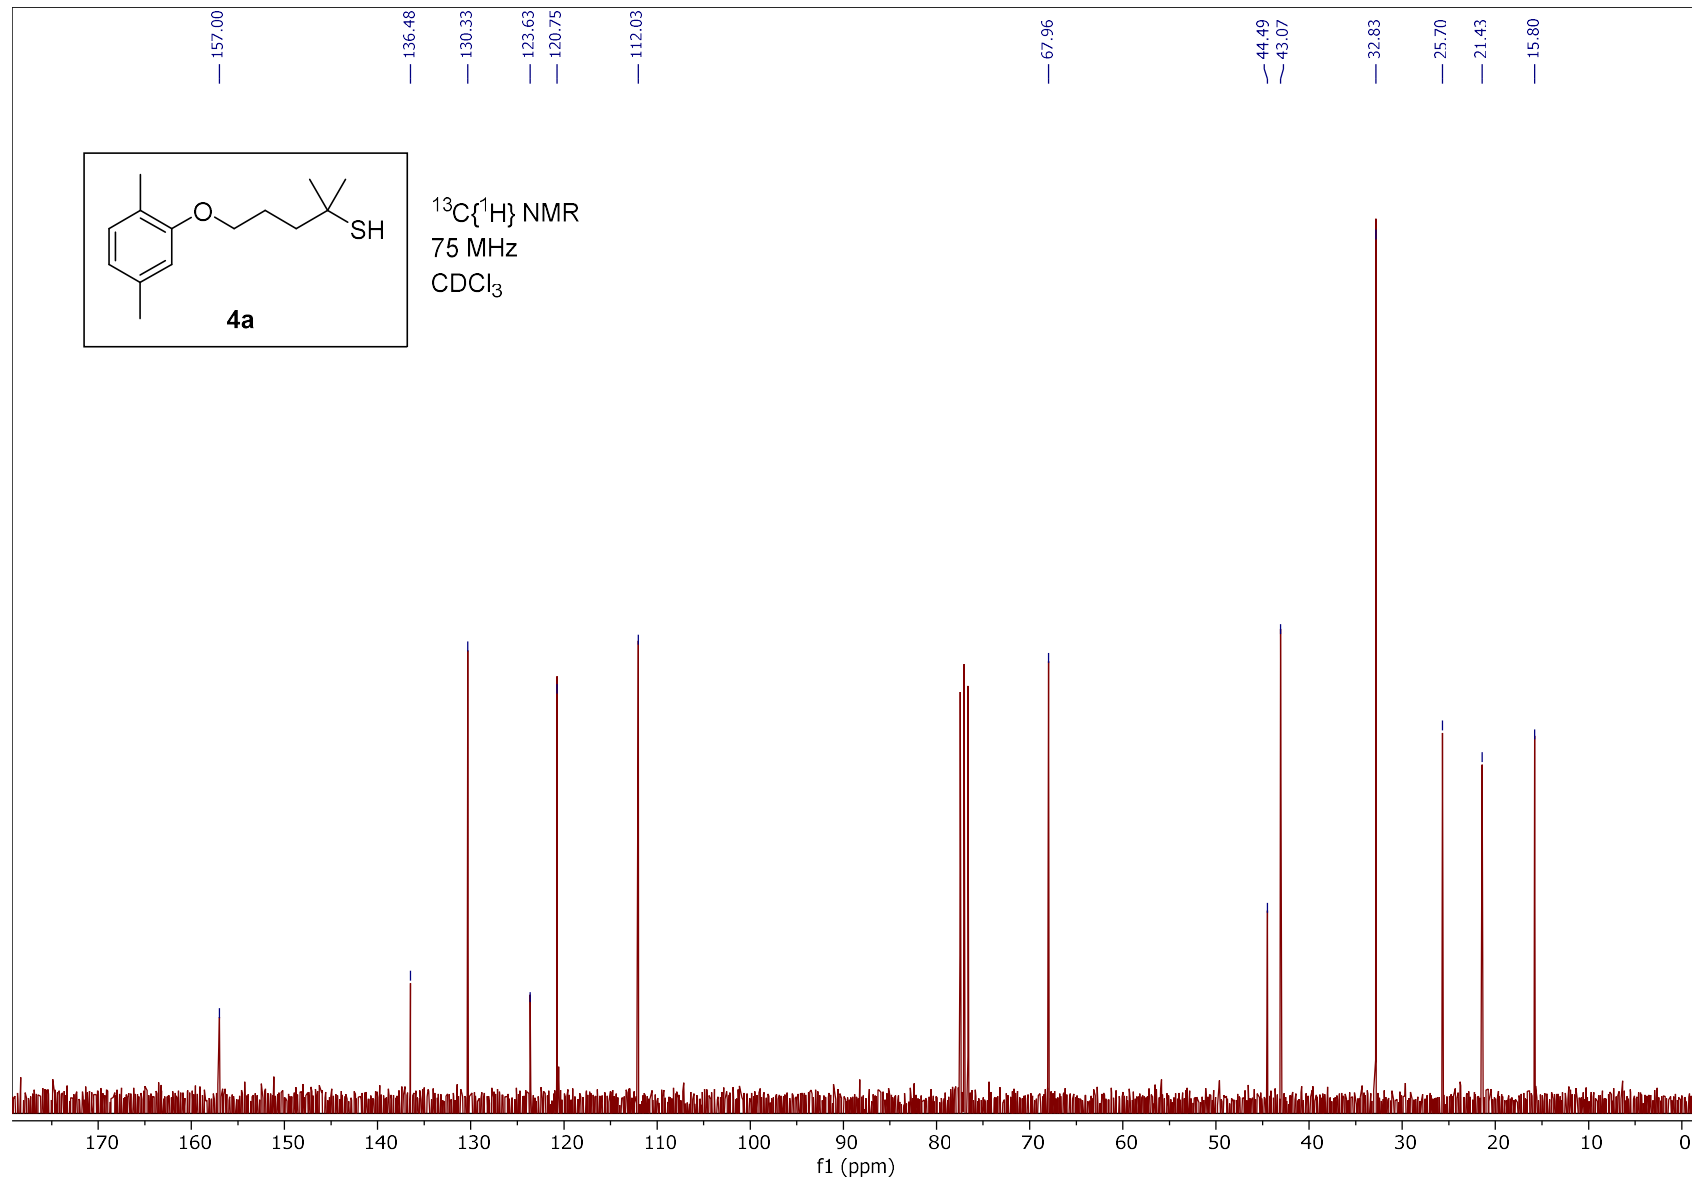

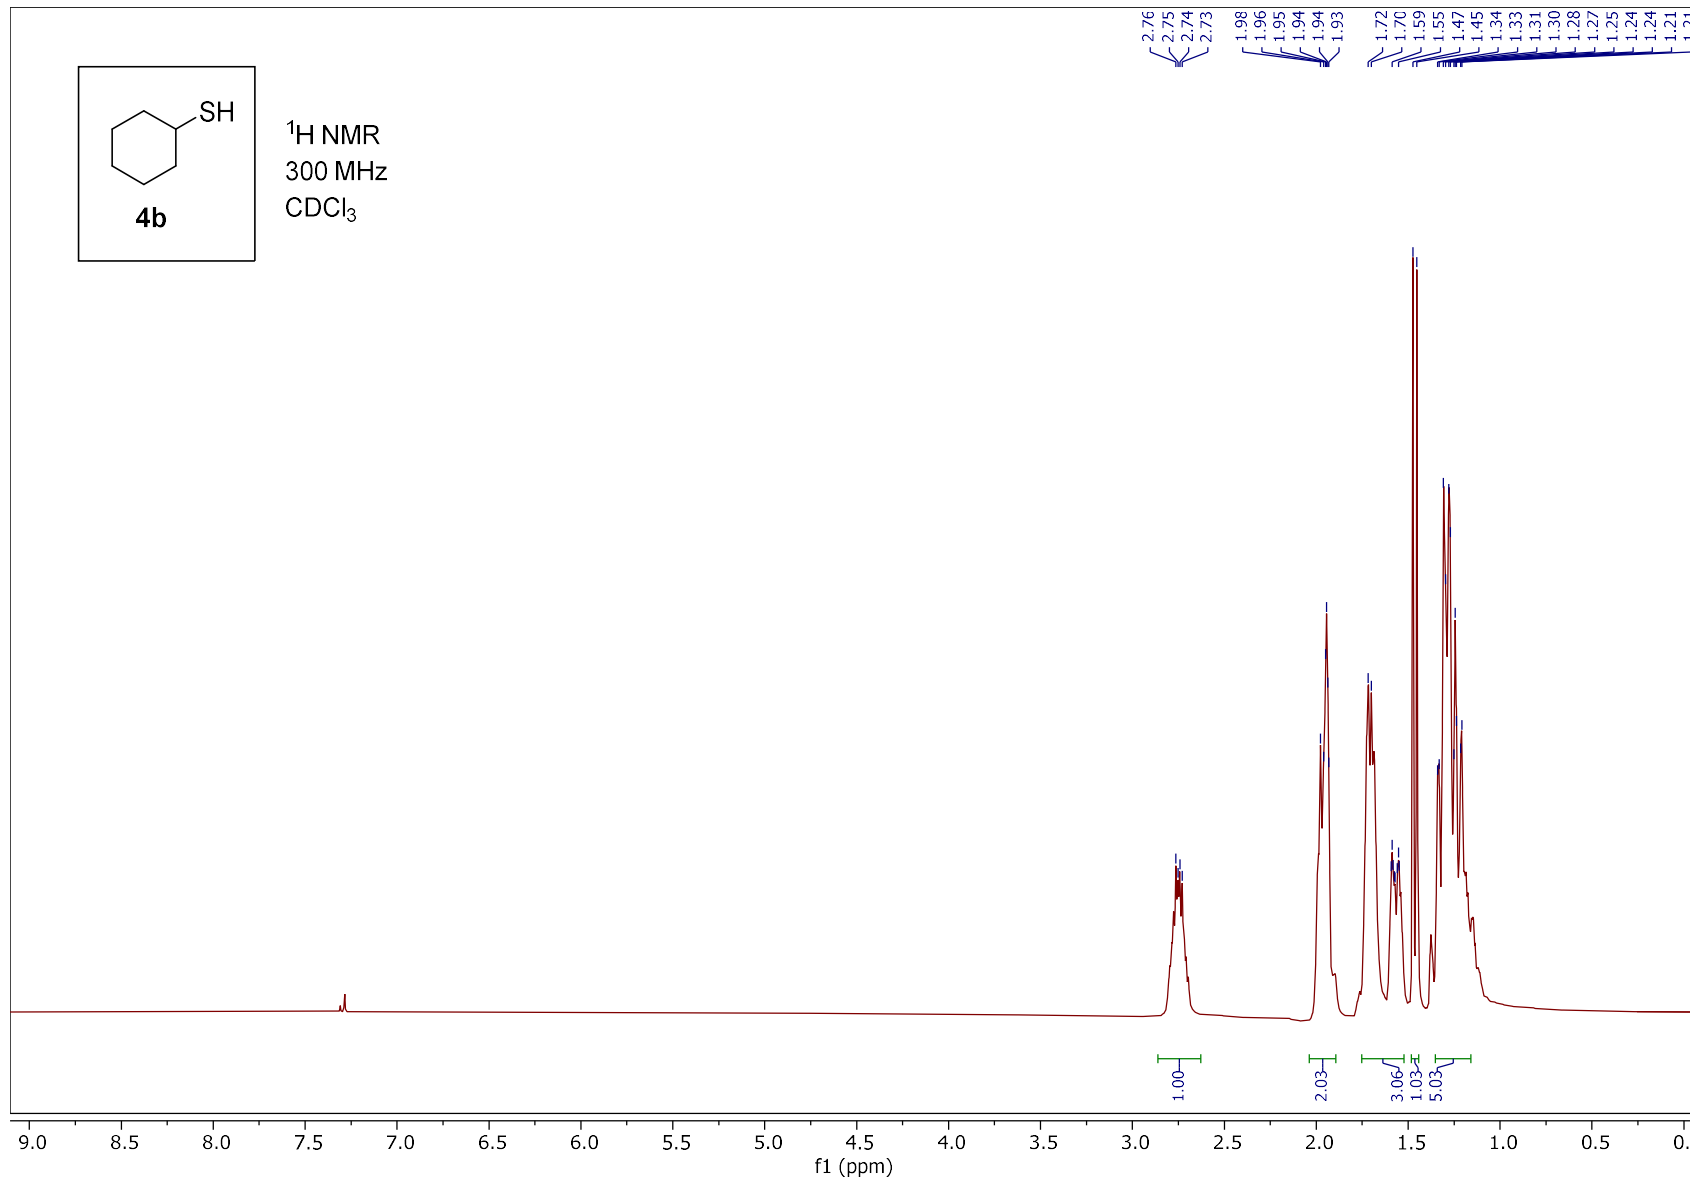

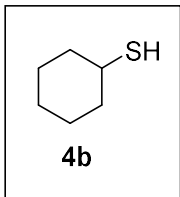

$^{13}\text{C}\{^1\text{H}\}$  NMR  
75 MHz  
 $\text{CDCl}_3$

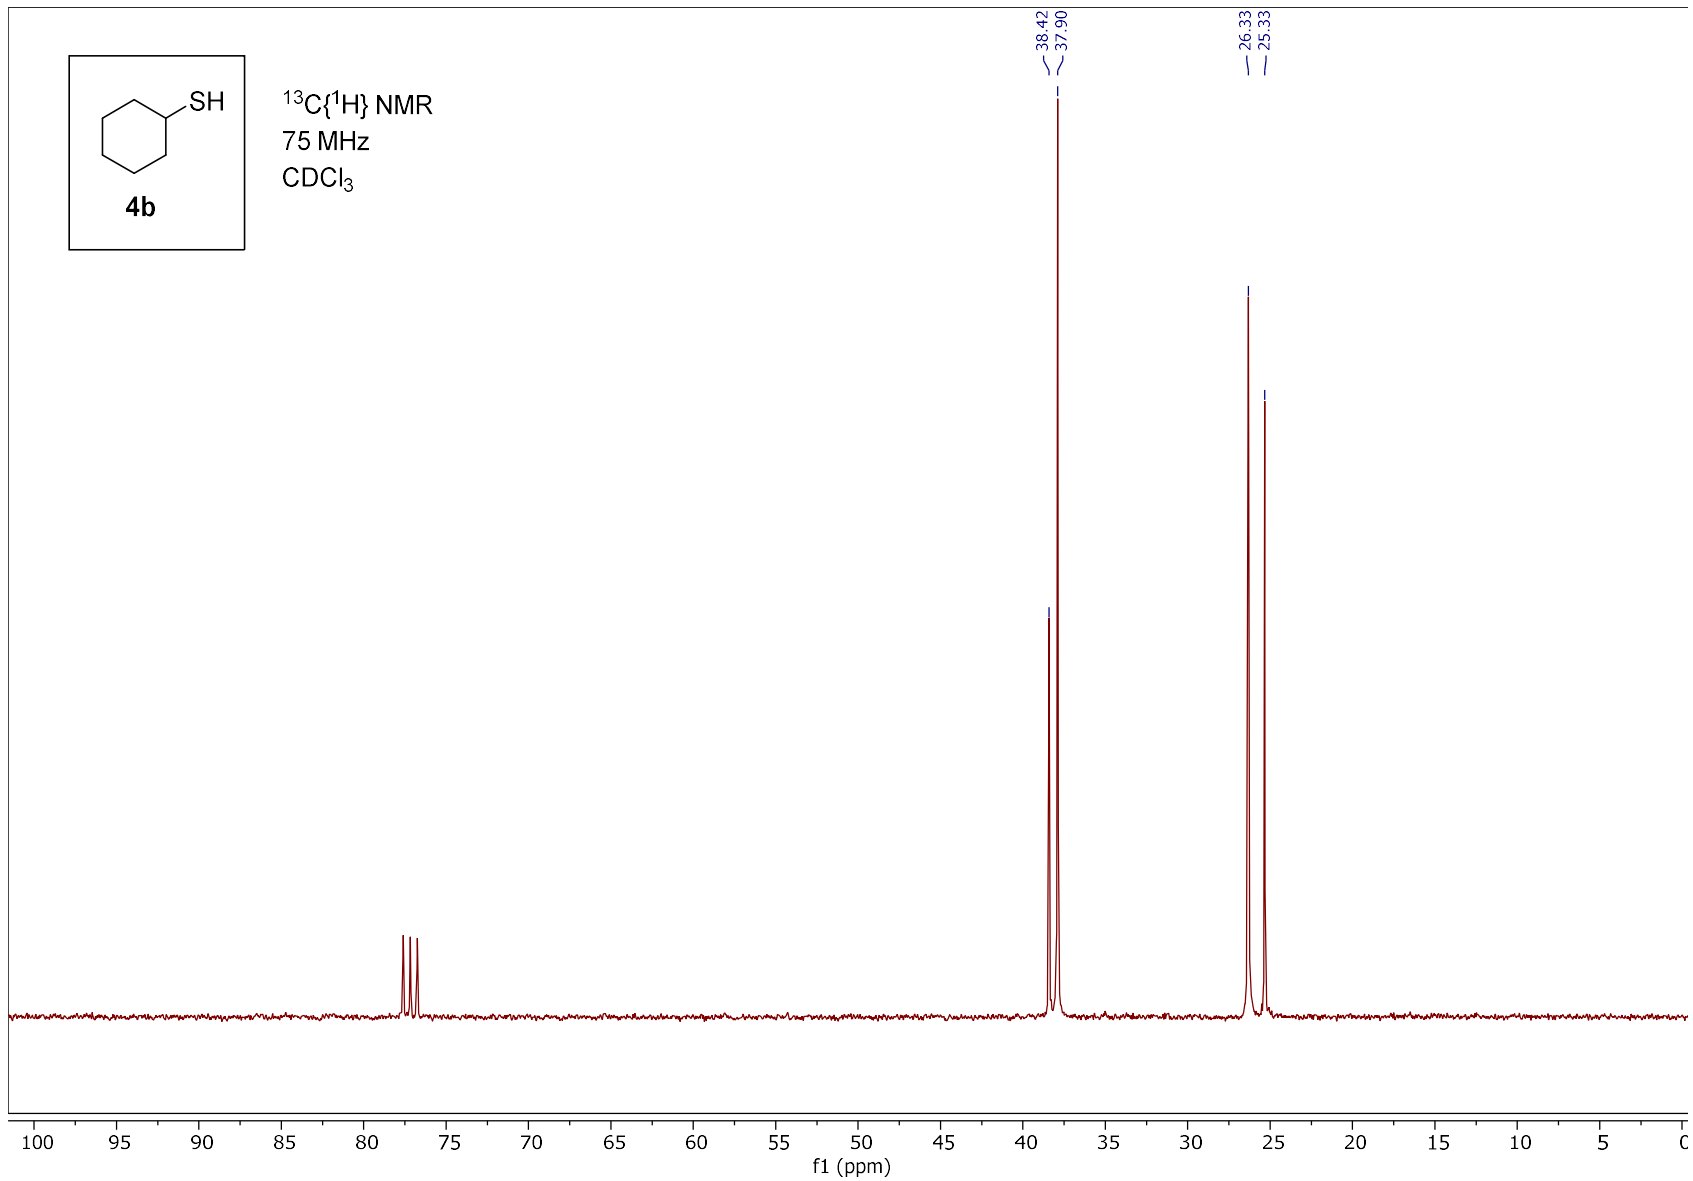

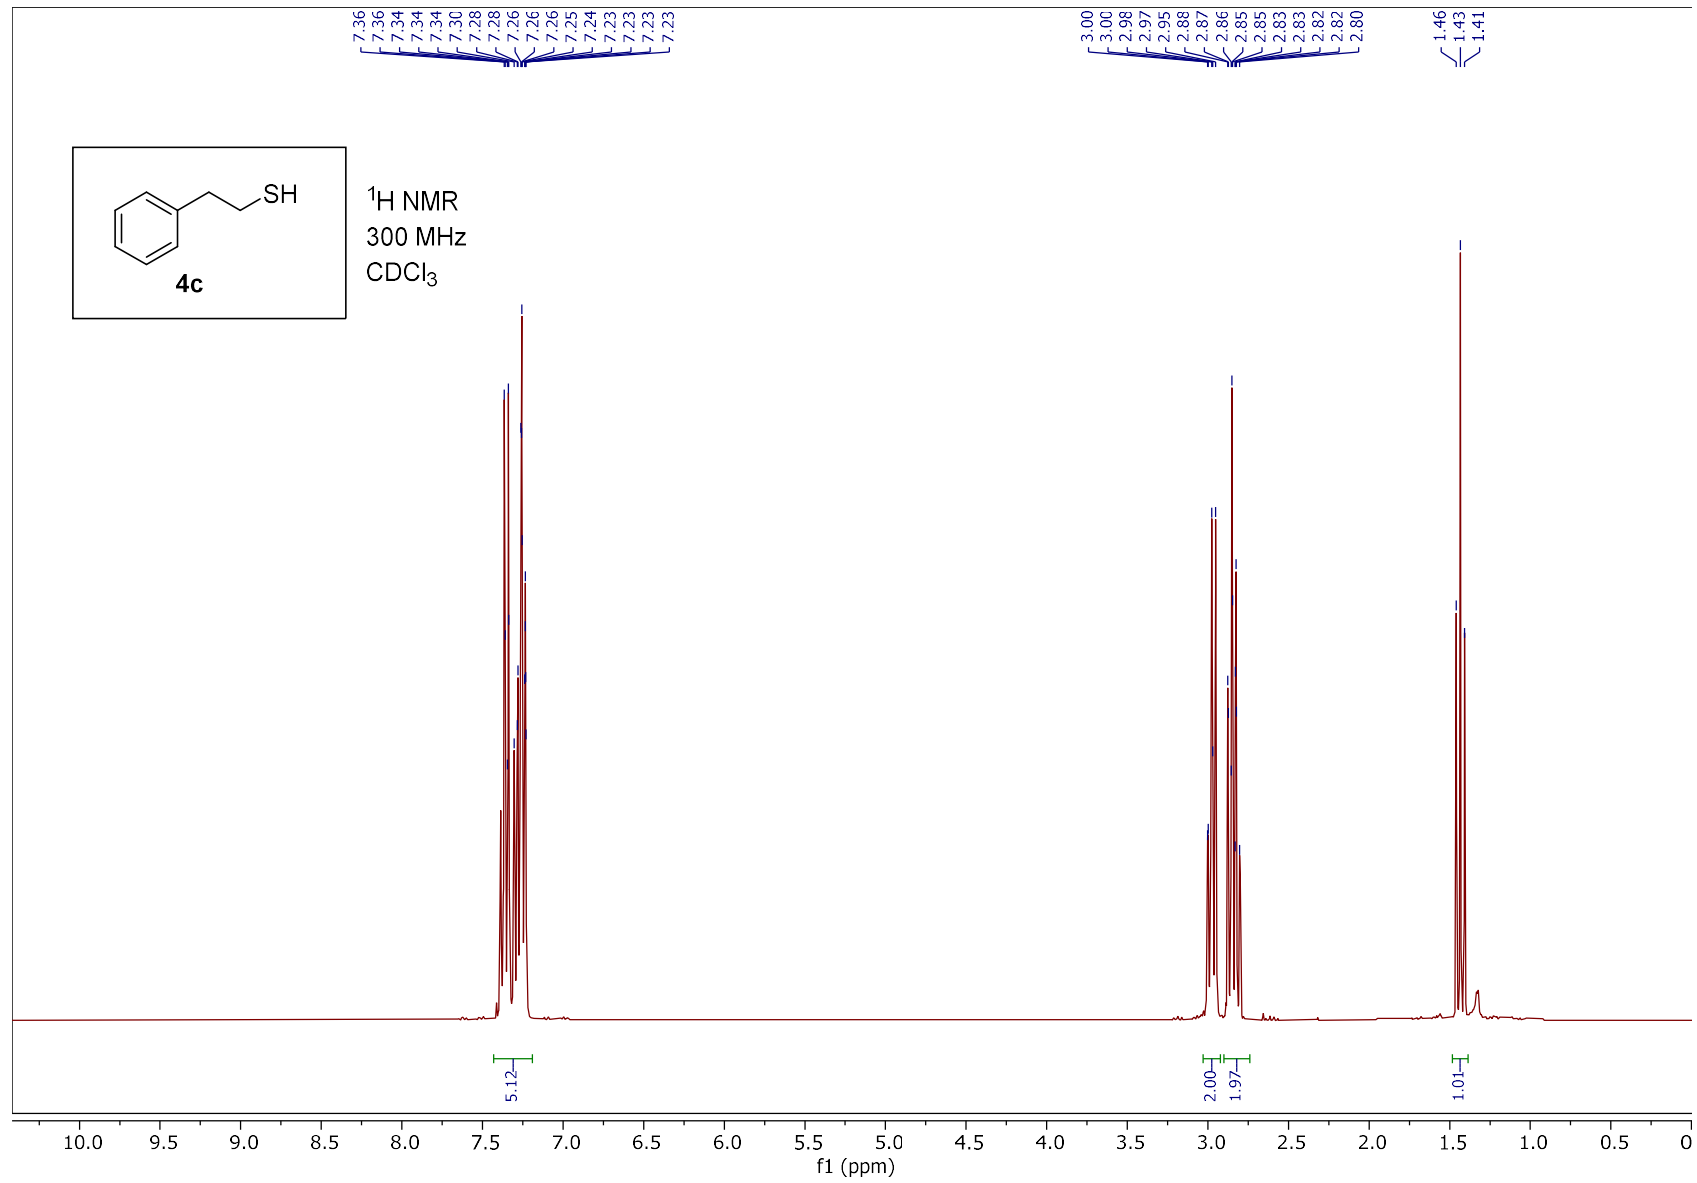

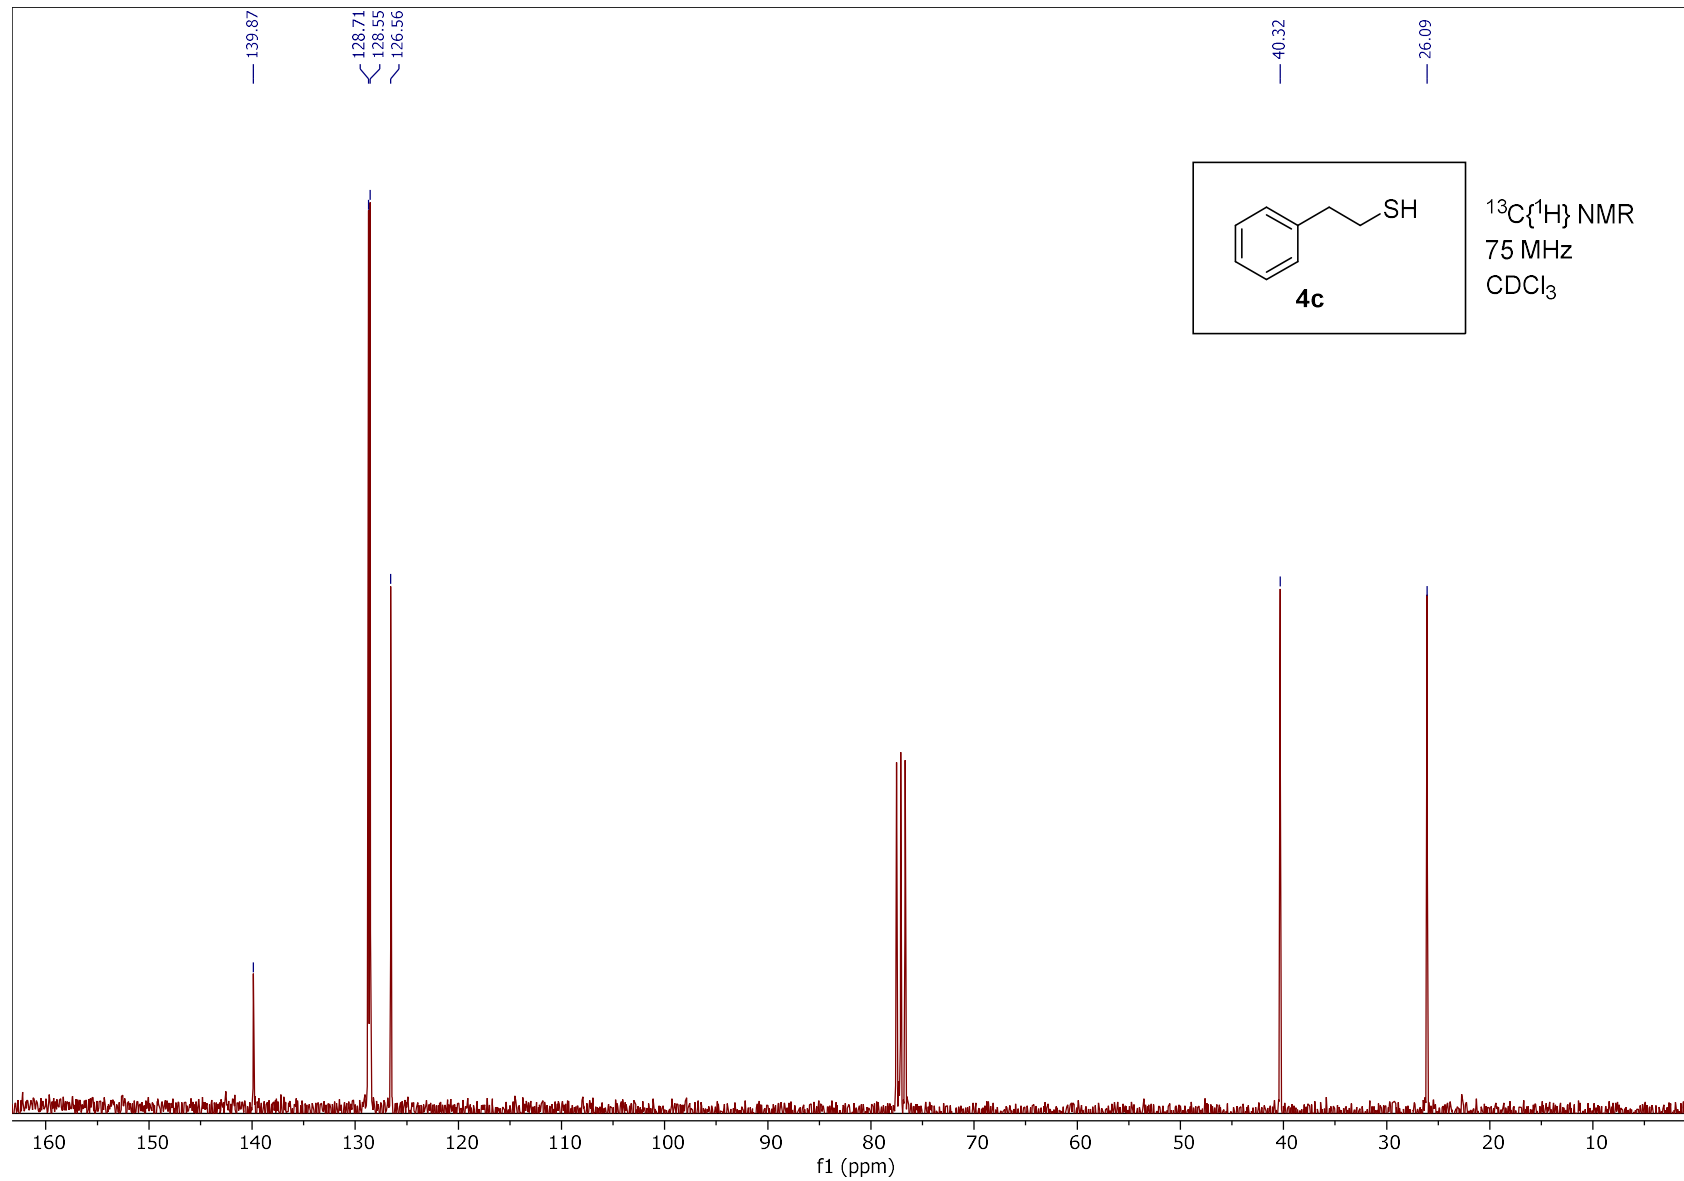

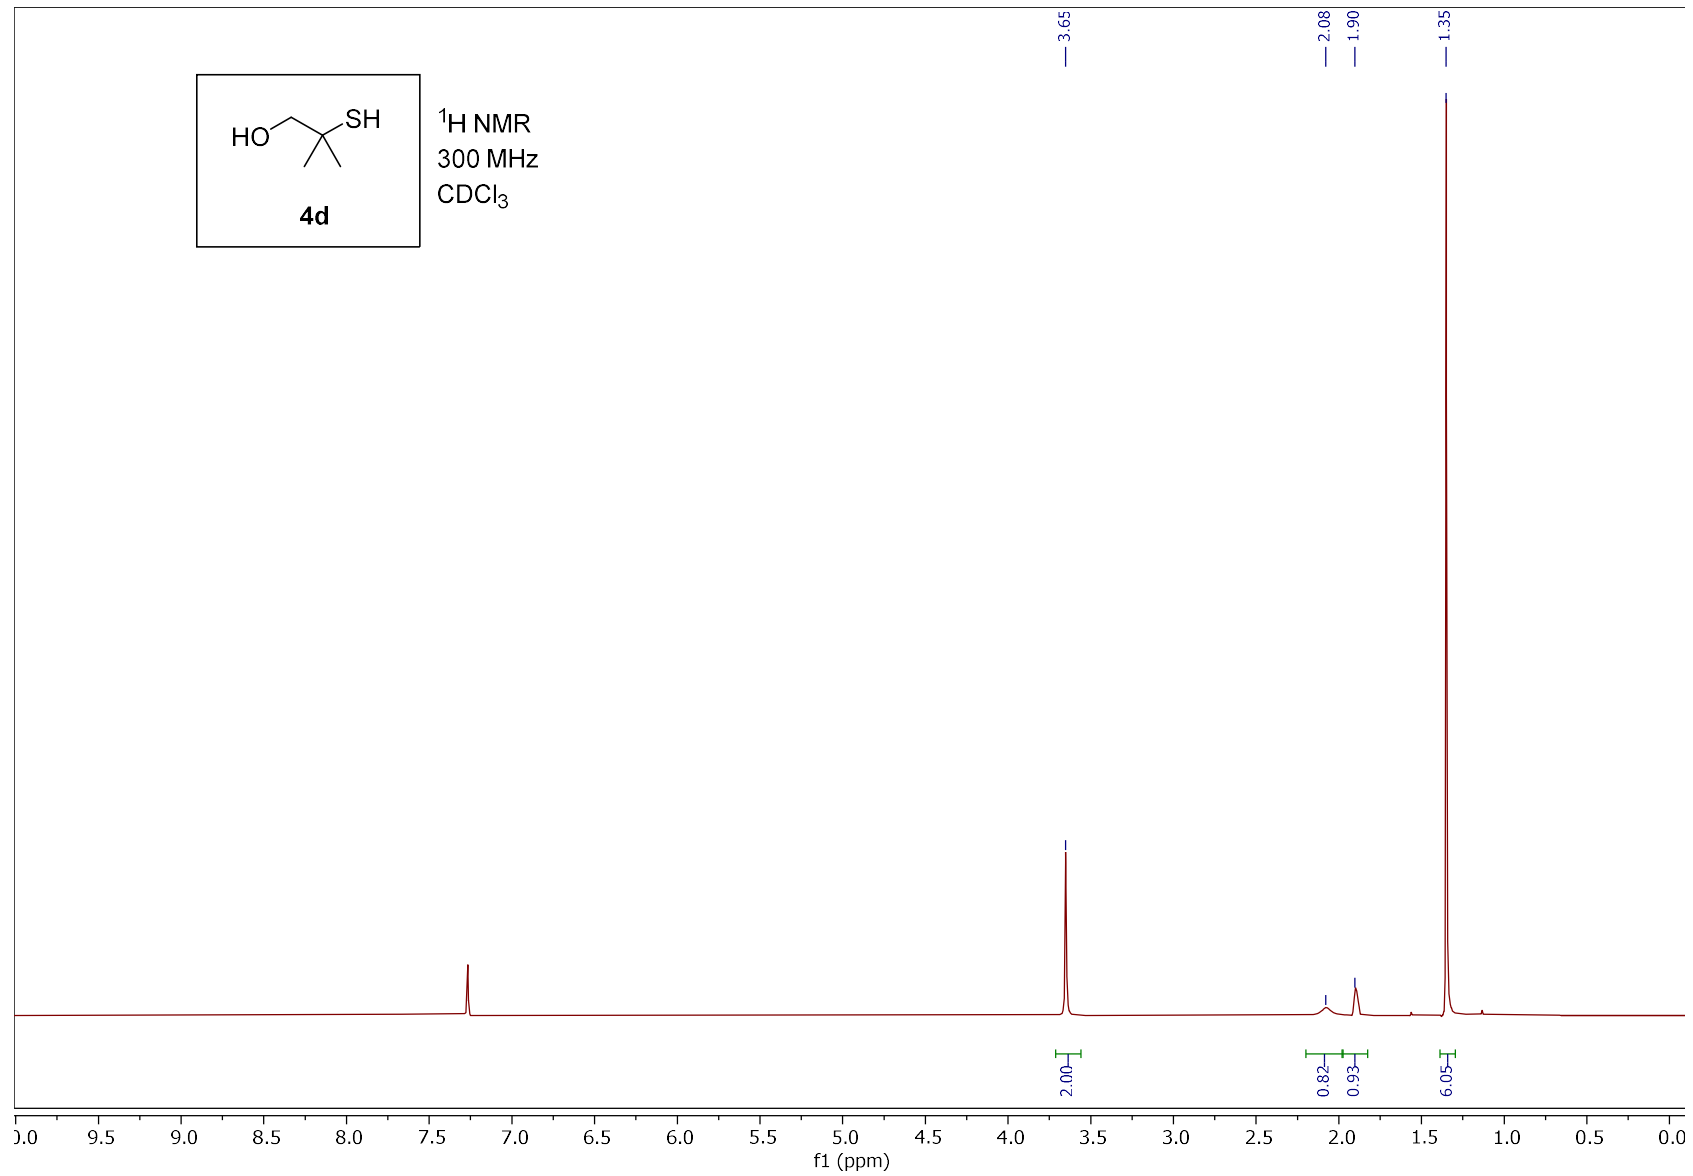



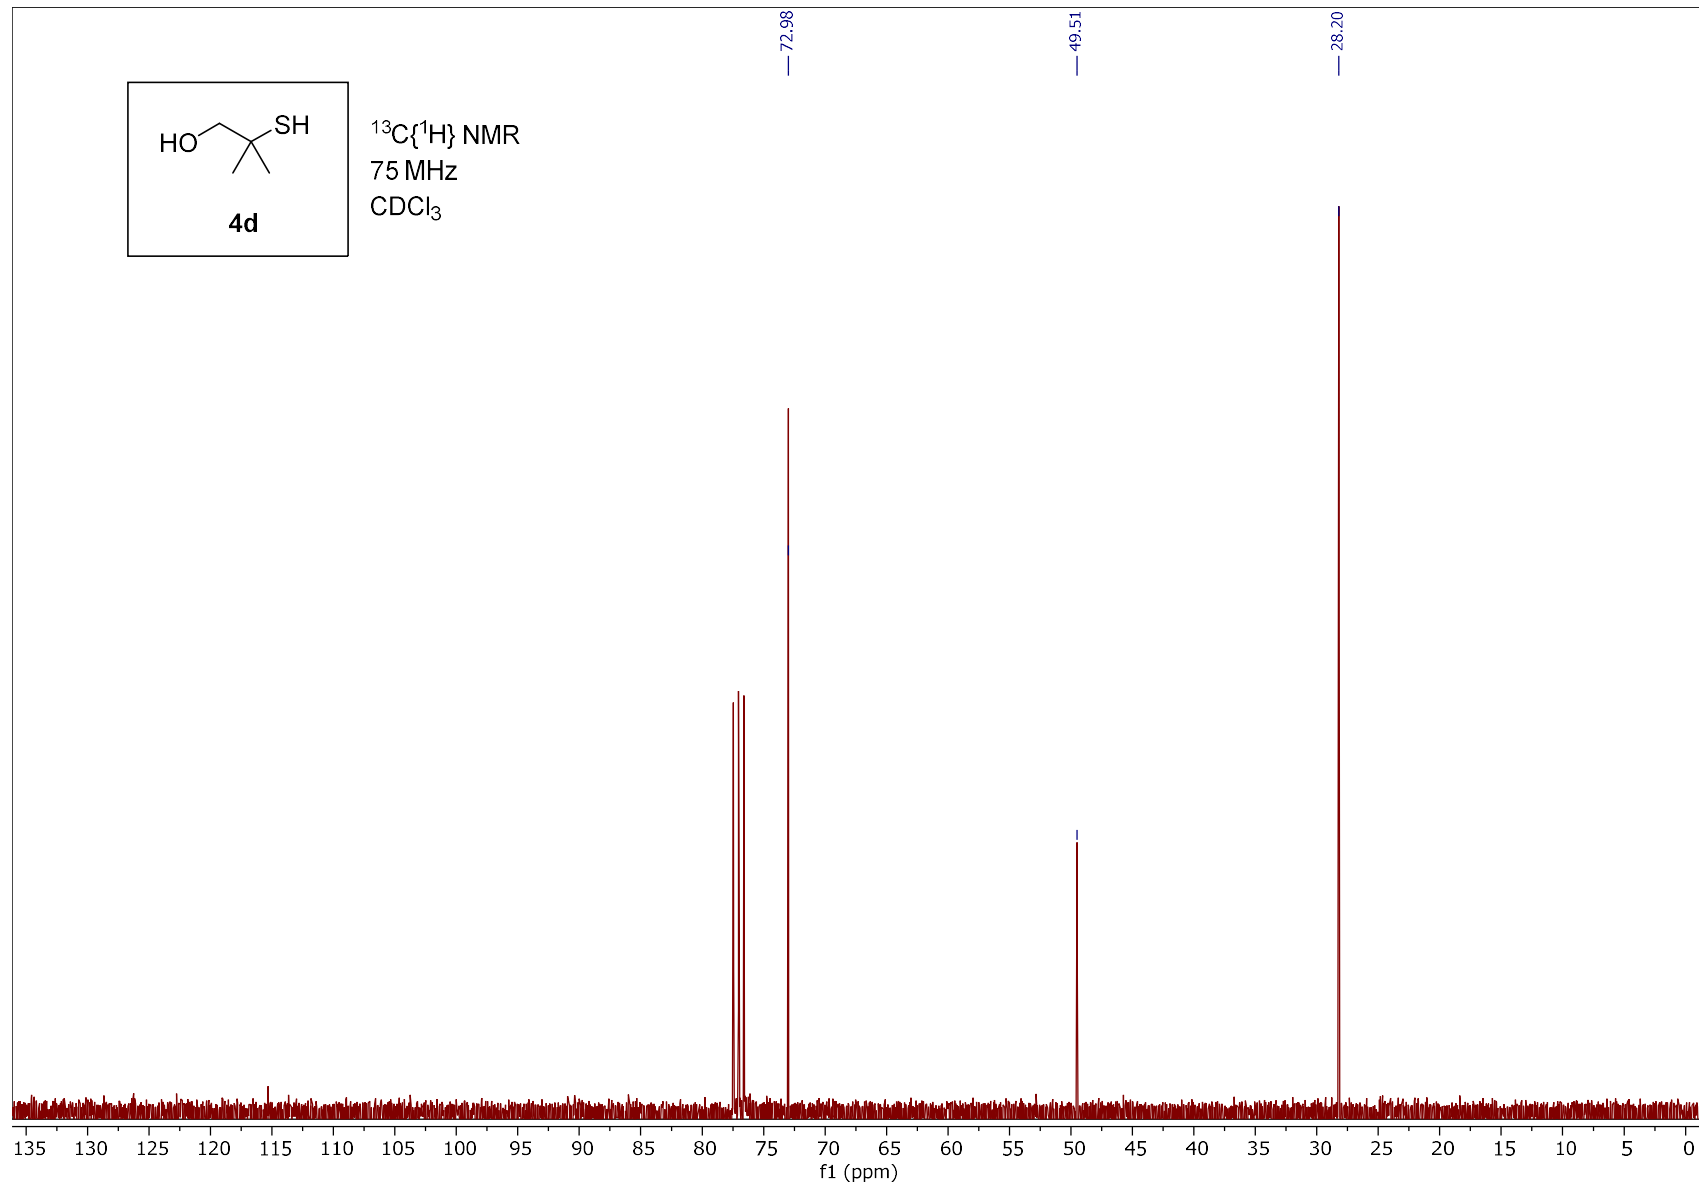

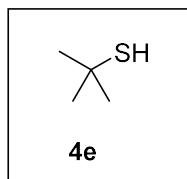

<sup>1</sup>H NMR  
300 MHz  
CDCl<sub>3</sub>

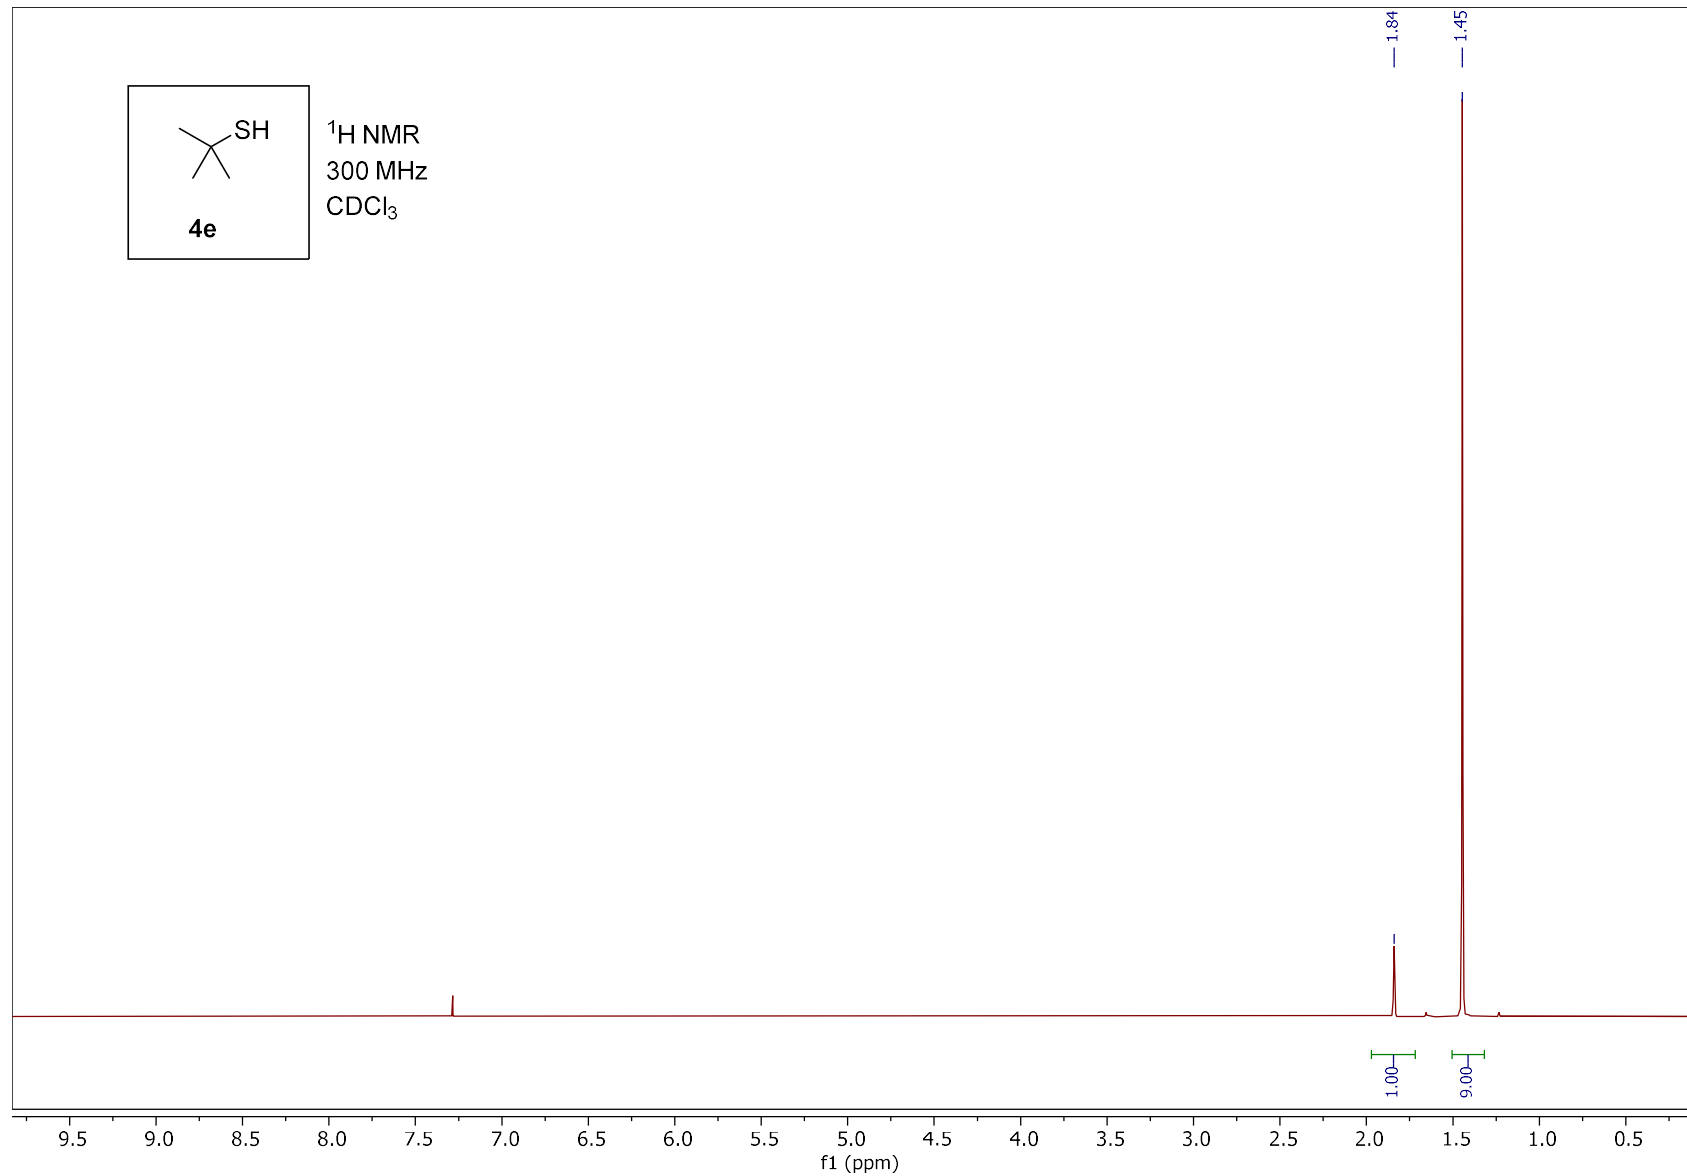

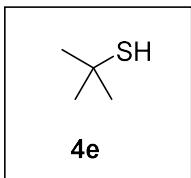

$^{13}\text{C}\{^1\text{H}\}$  NMR  
75 MHz  
 $\text{CDCl}_3$

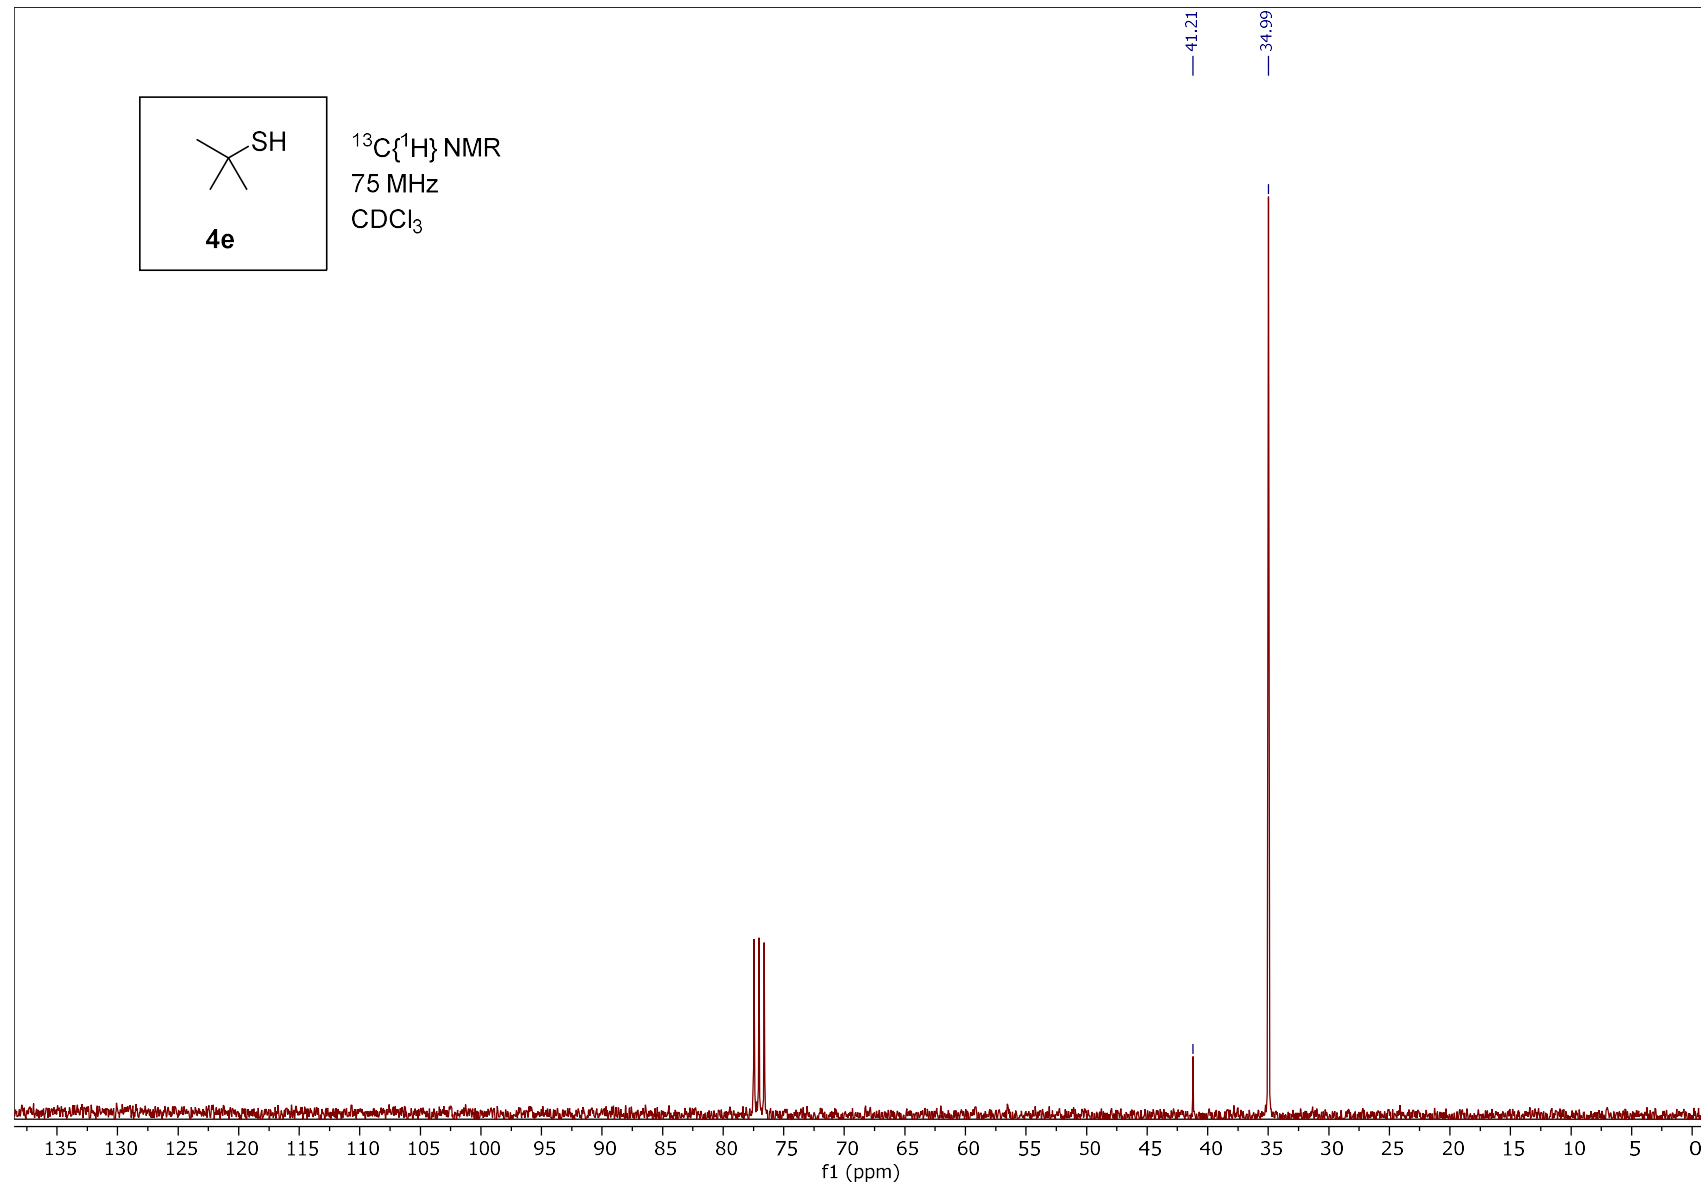

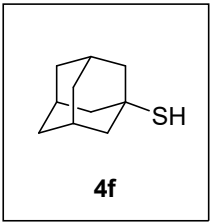

<sup>1</sup>H NMR  
300 MHz  
CDCl<sub>3</sub>

— 2.12  
— 1.80  
— 1.70  
— 1.60

3.00  
0.92  
5.94  
5.87

0.0 9.5 9.0 8.5 8.0 7.5 7.0 6.5 6.0 5.5 5.0 4.5 4.0 3.5 3.0 2.5 2.0 1.5 1.0 0.5 0

f1 (ppm)

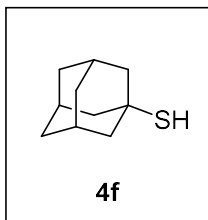

$^{13}\text{C}\{^1\text{H}\}$  NMR  
75 MHz  
 $\text{CDCl}_3$

45.32  
42.23  
36.09  
30.71

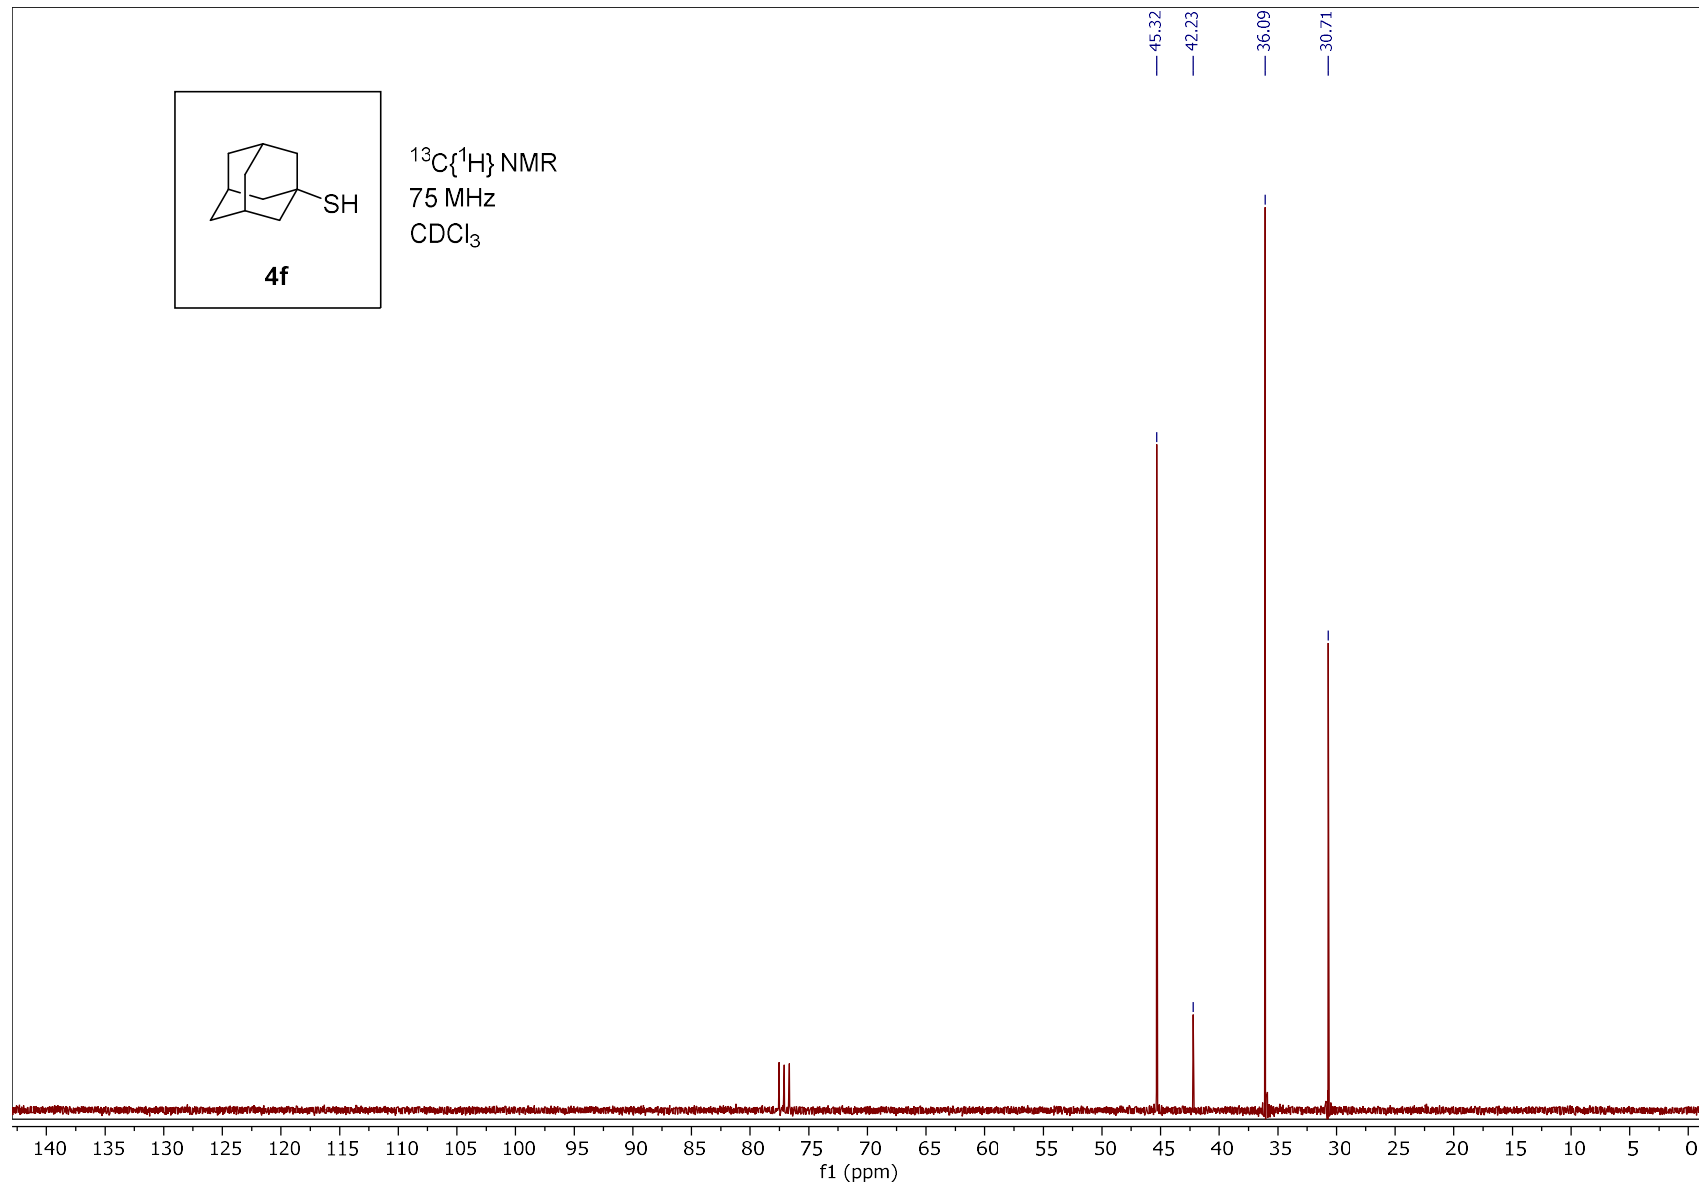

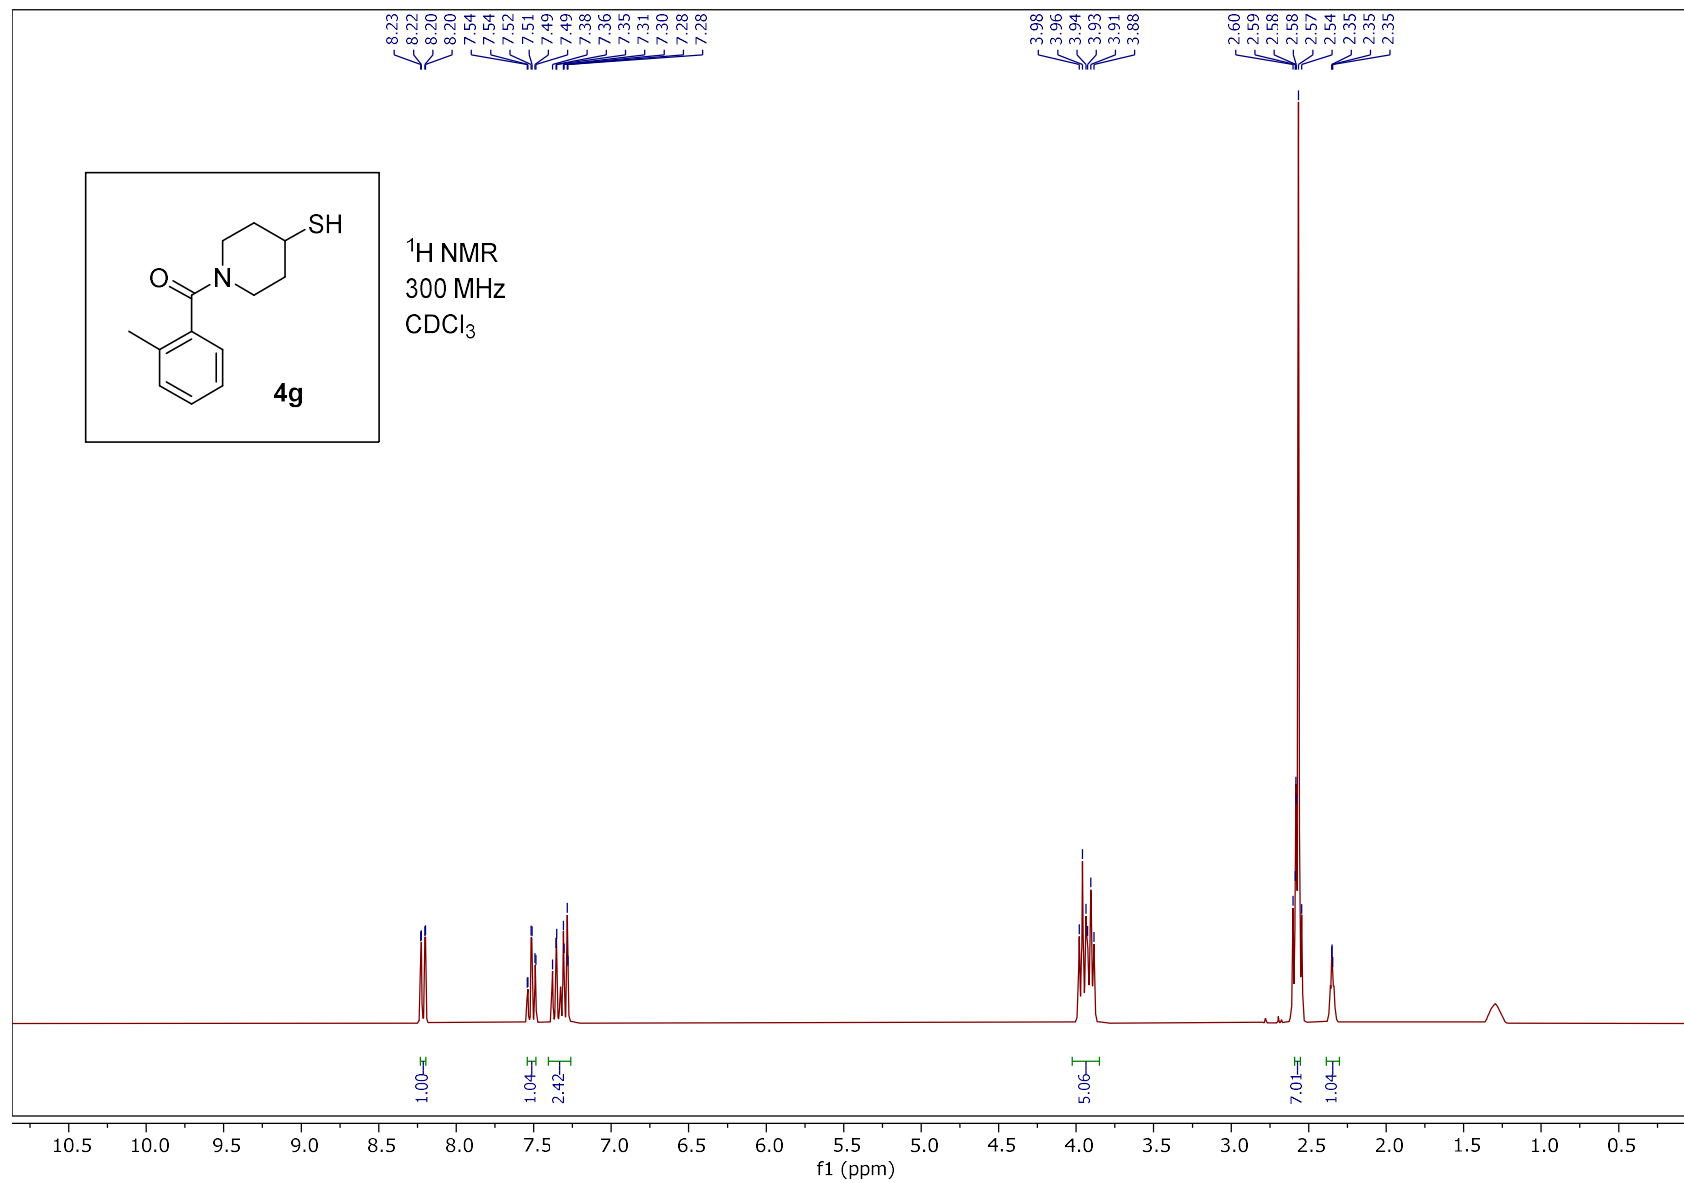

S182

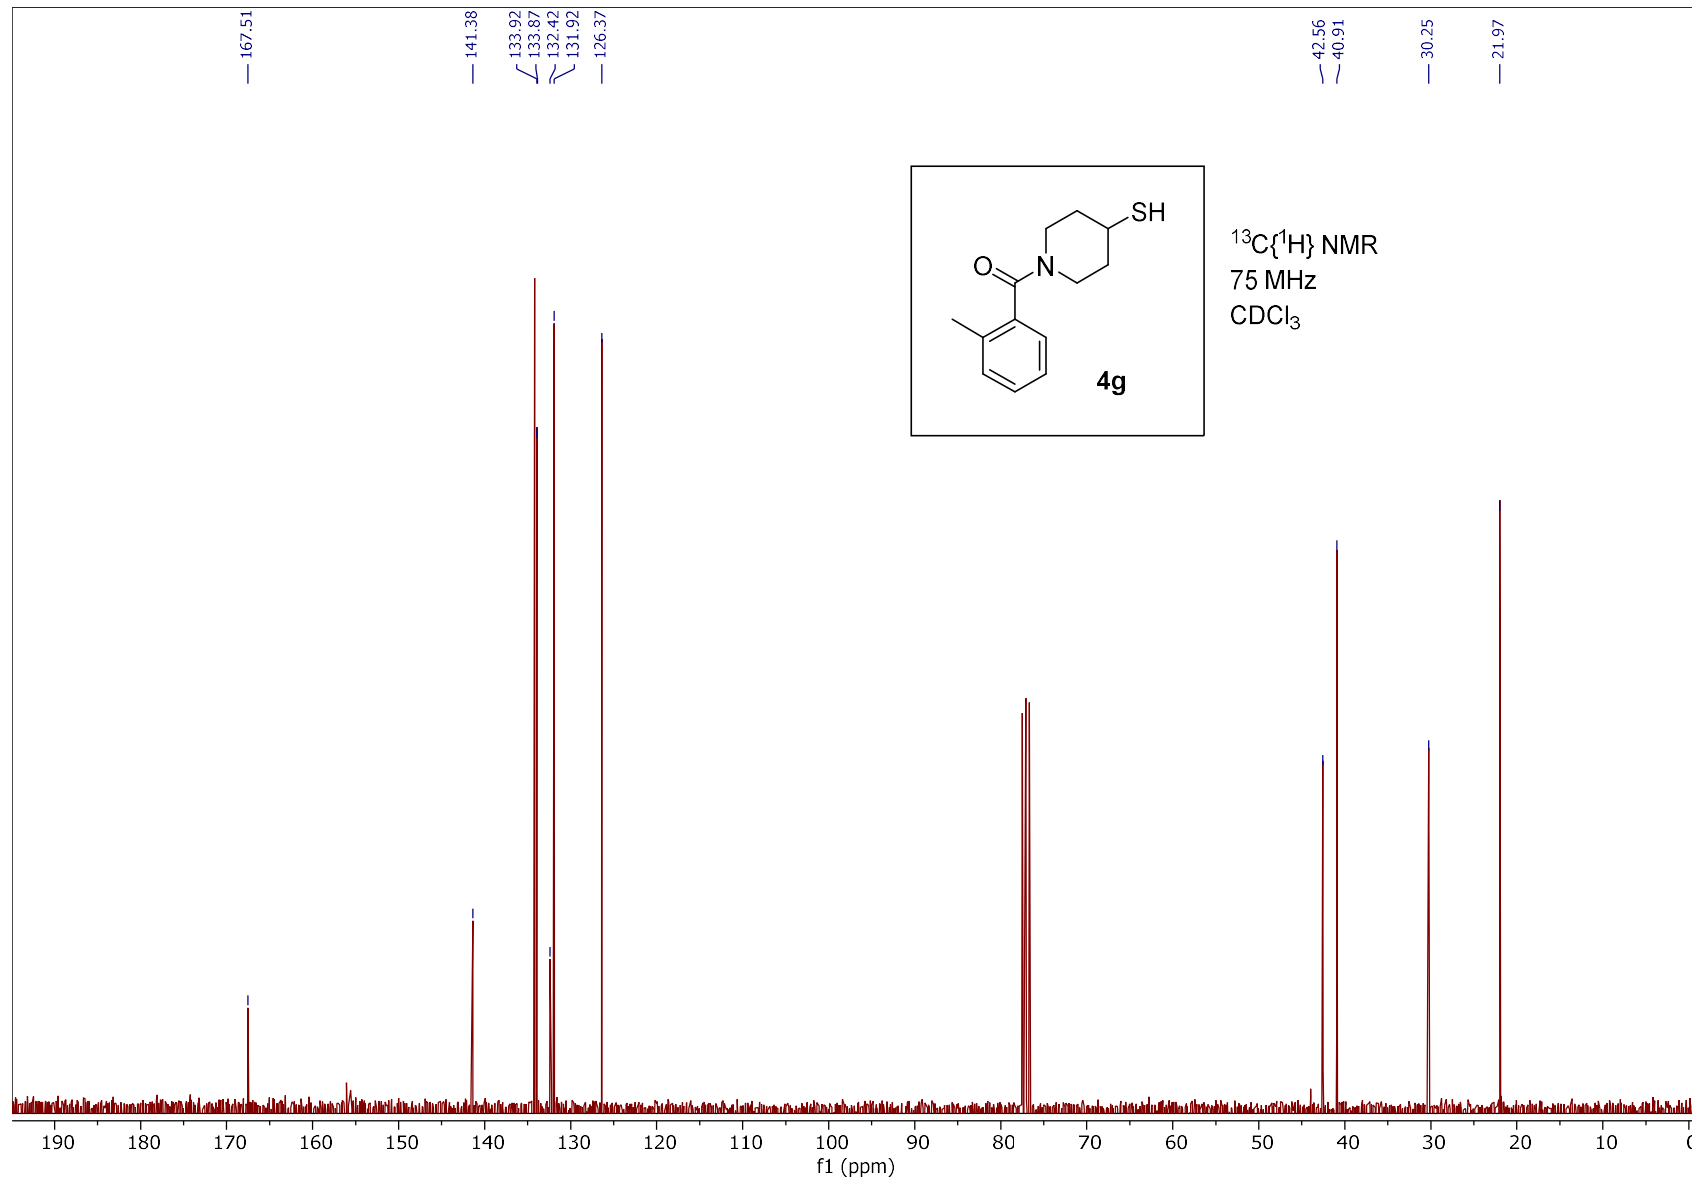

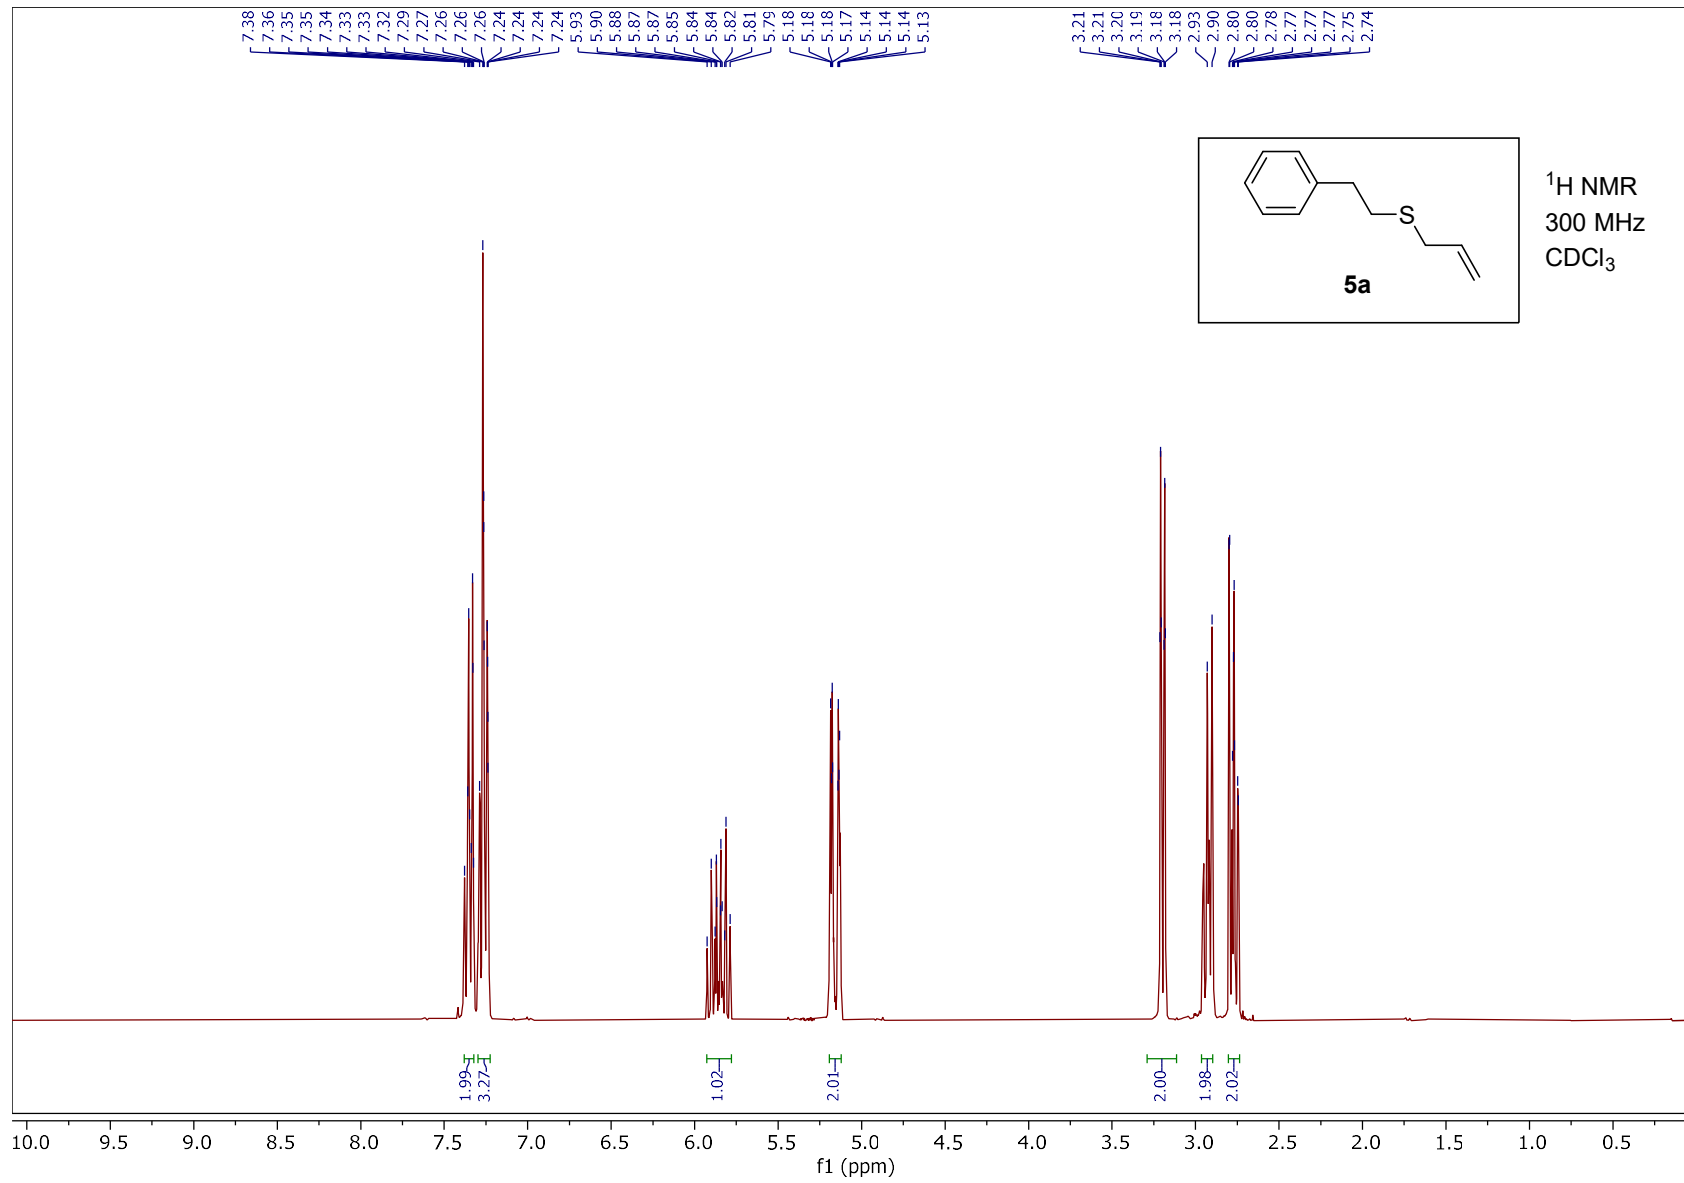



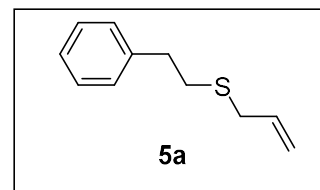

$^{13}\text{C}\{^1\text{H}\}$  NMR  
75 MHz  
 $\text{CDCl}_3$

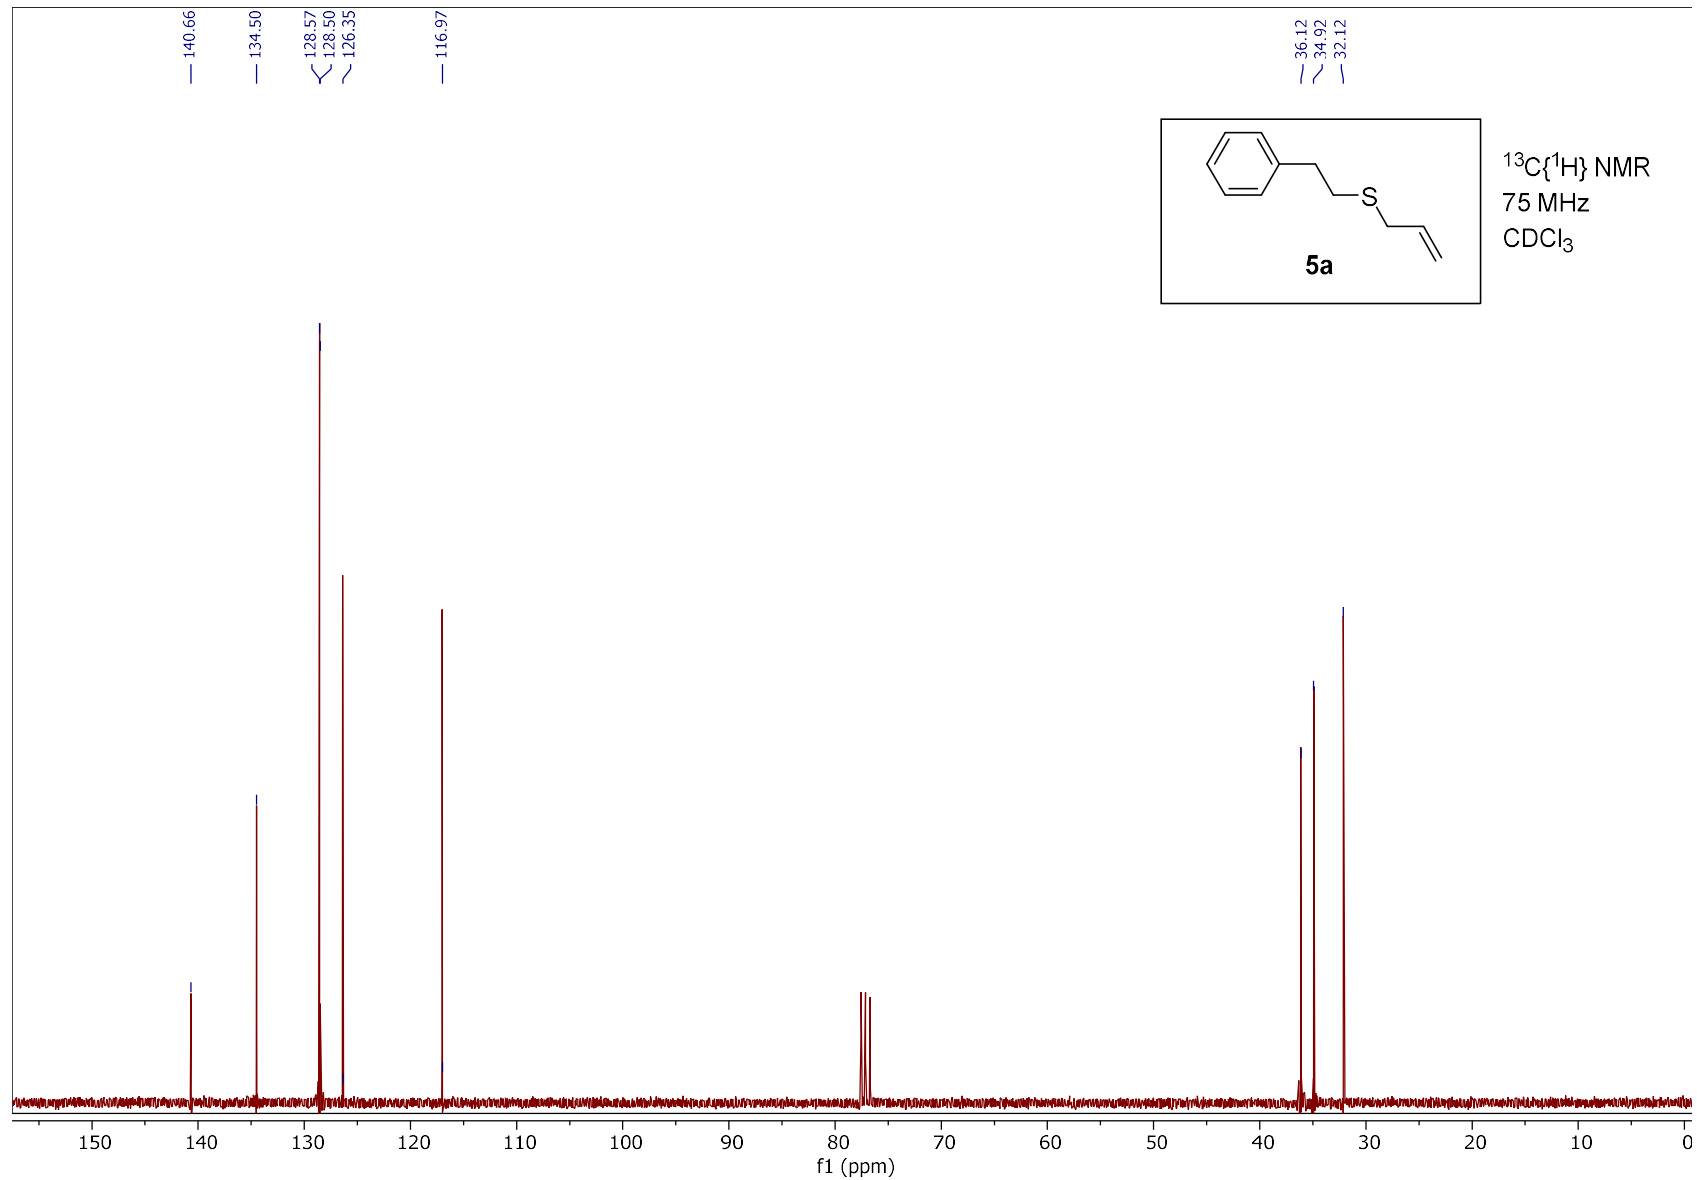

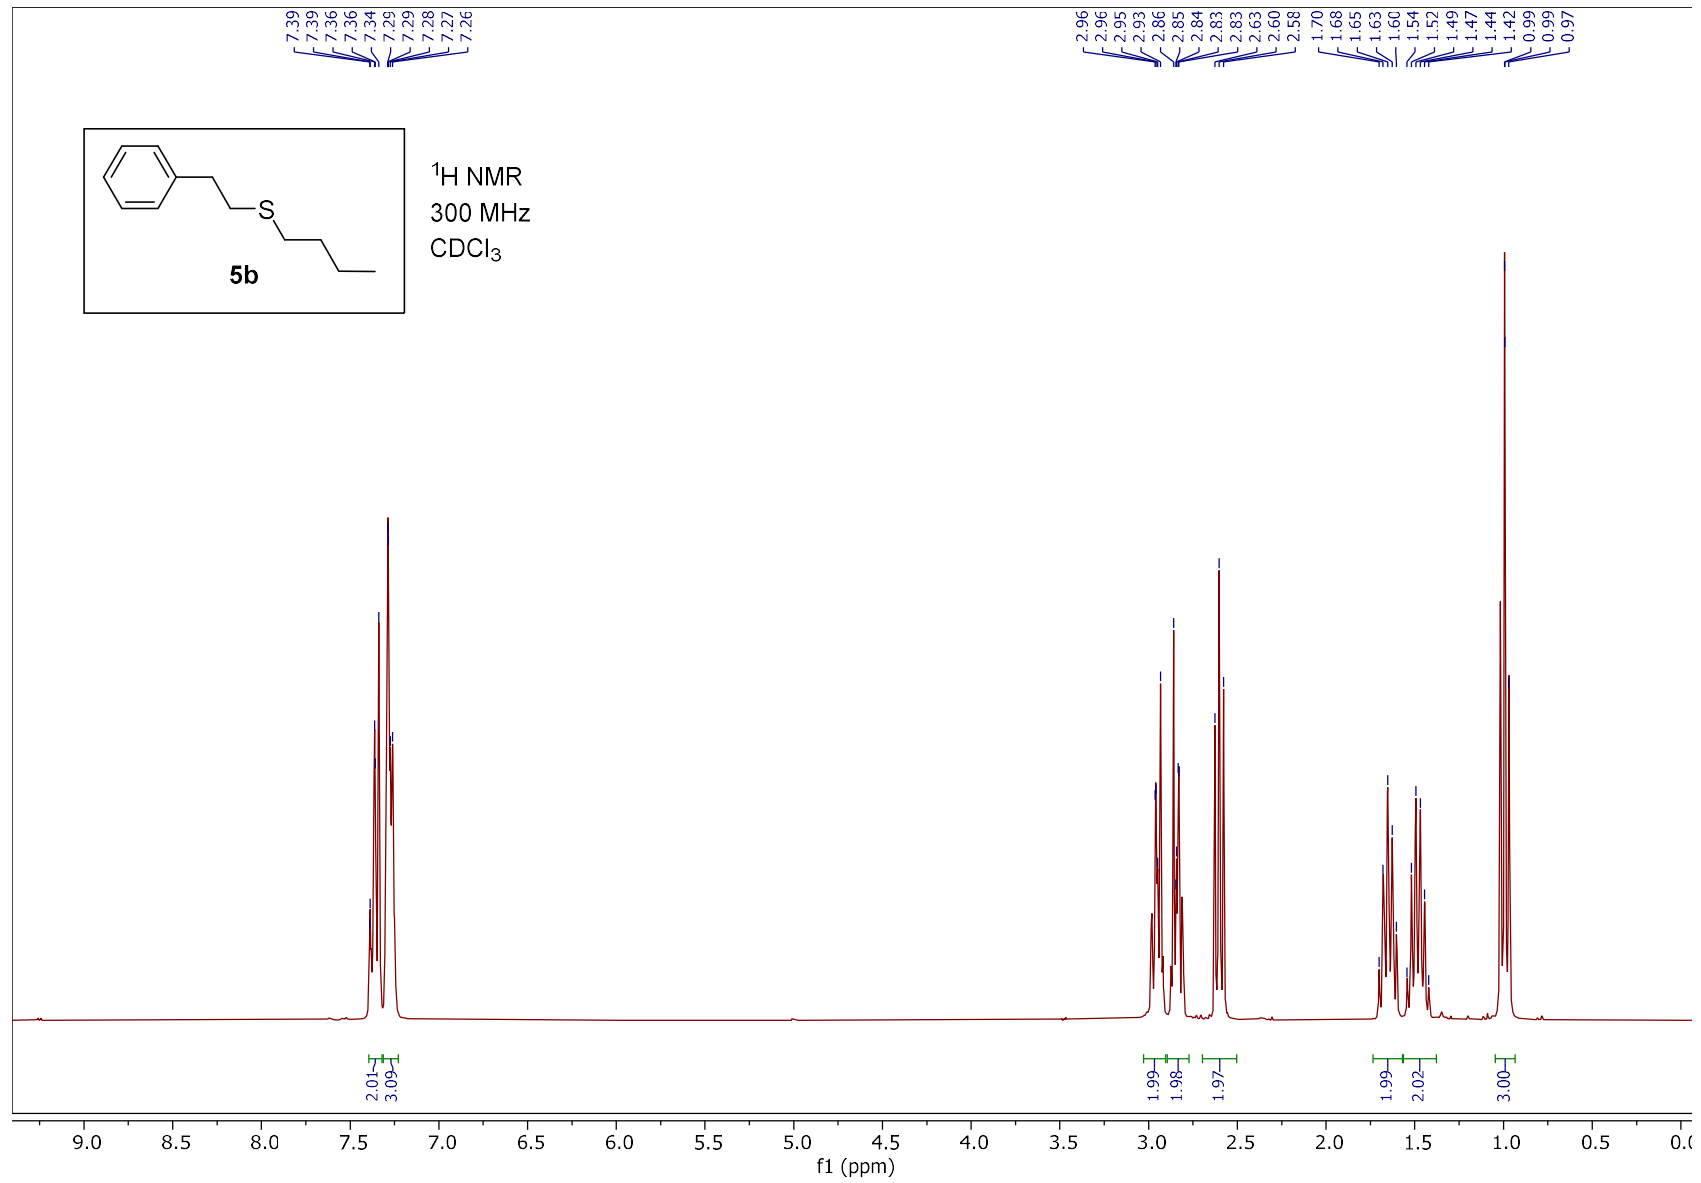

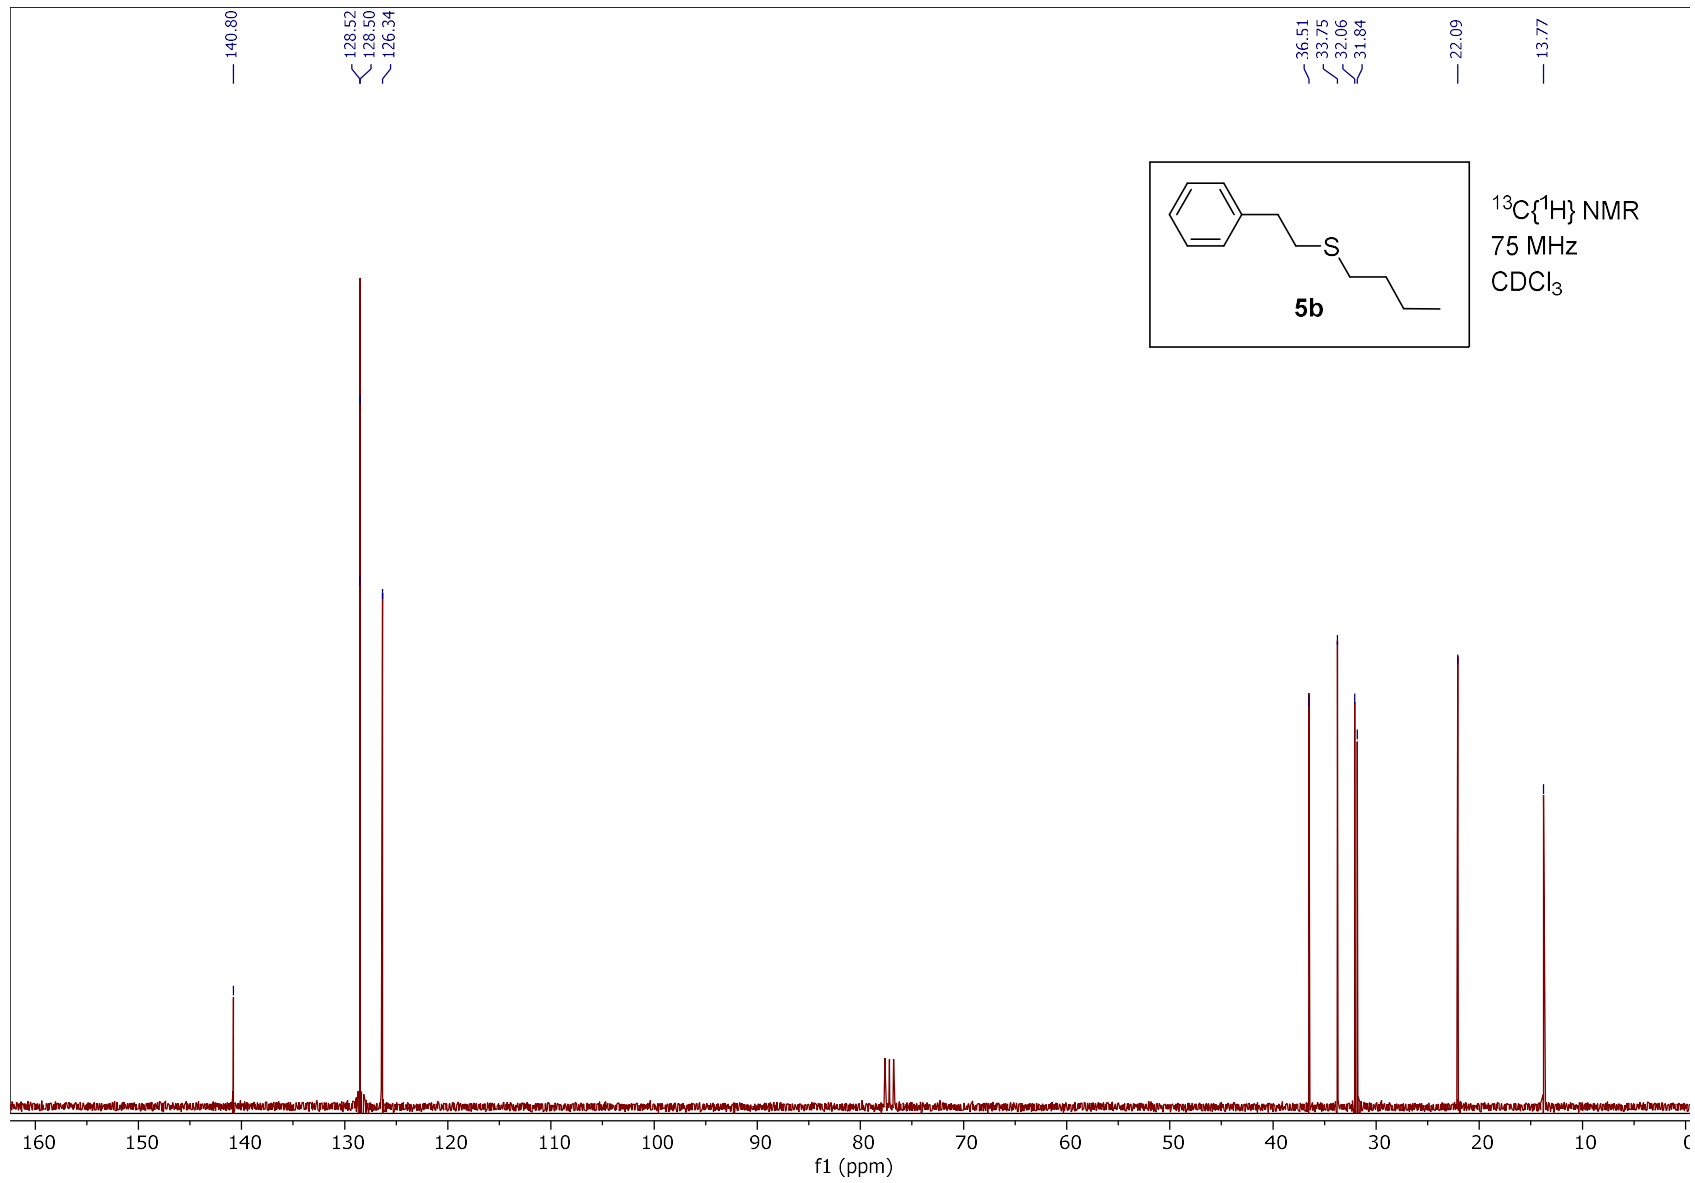

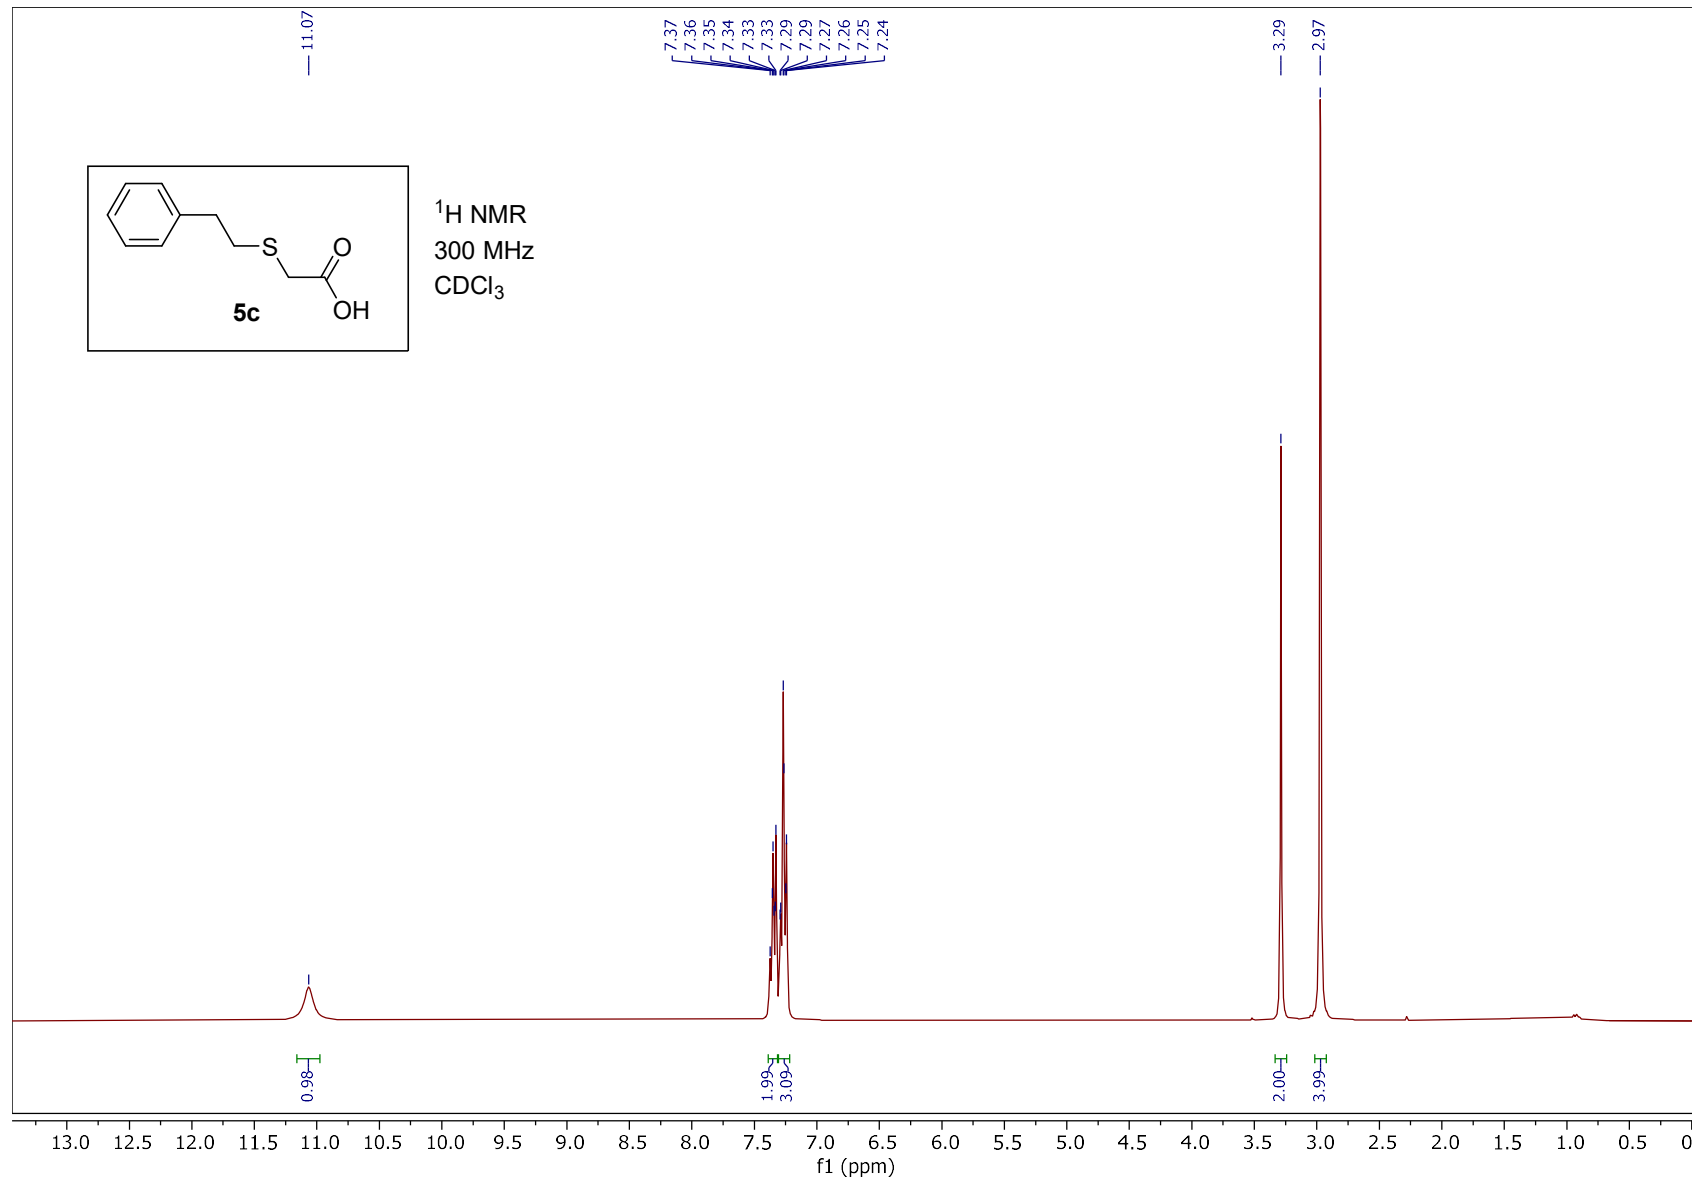

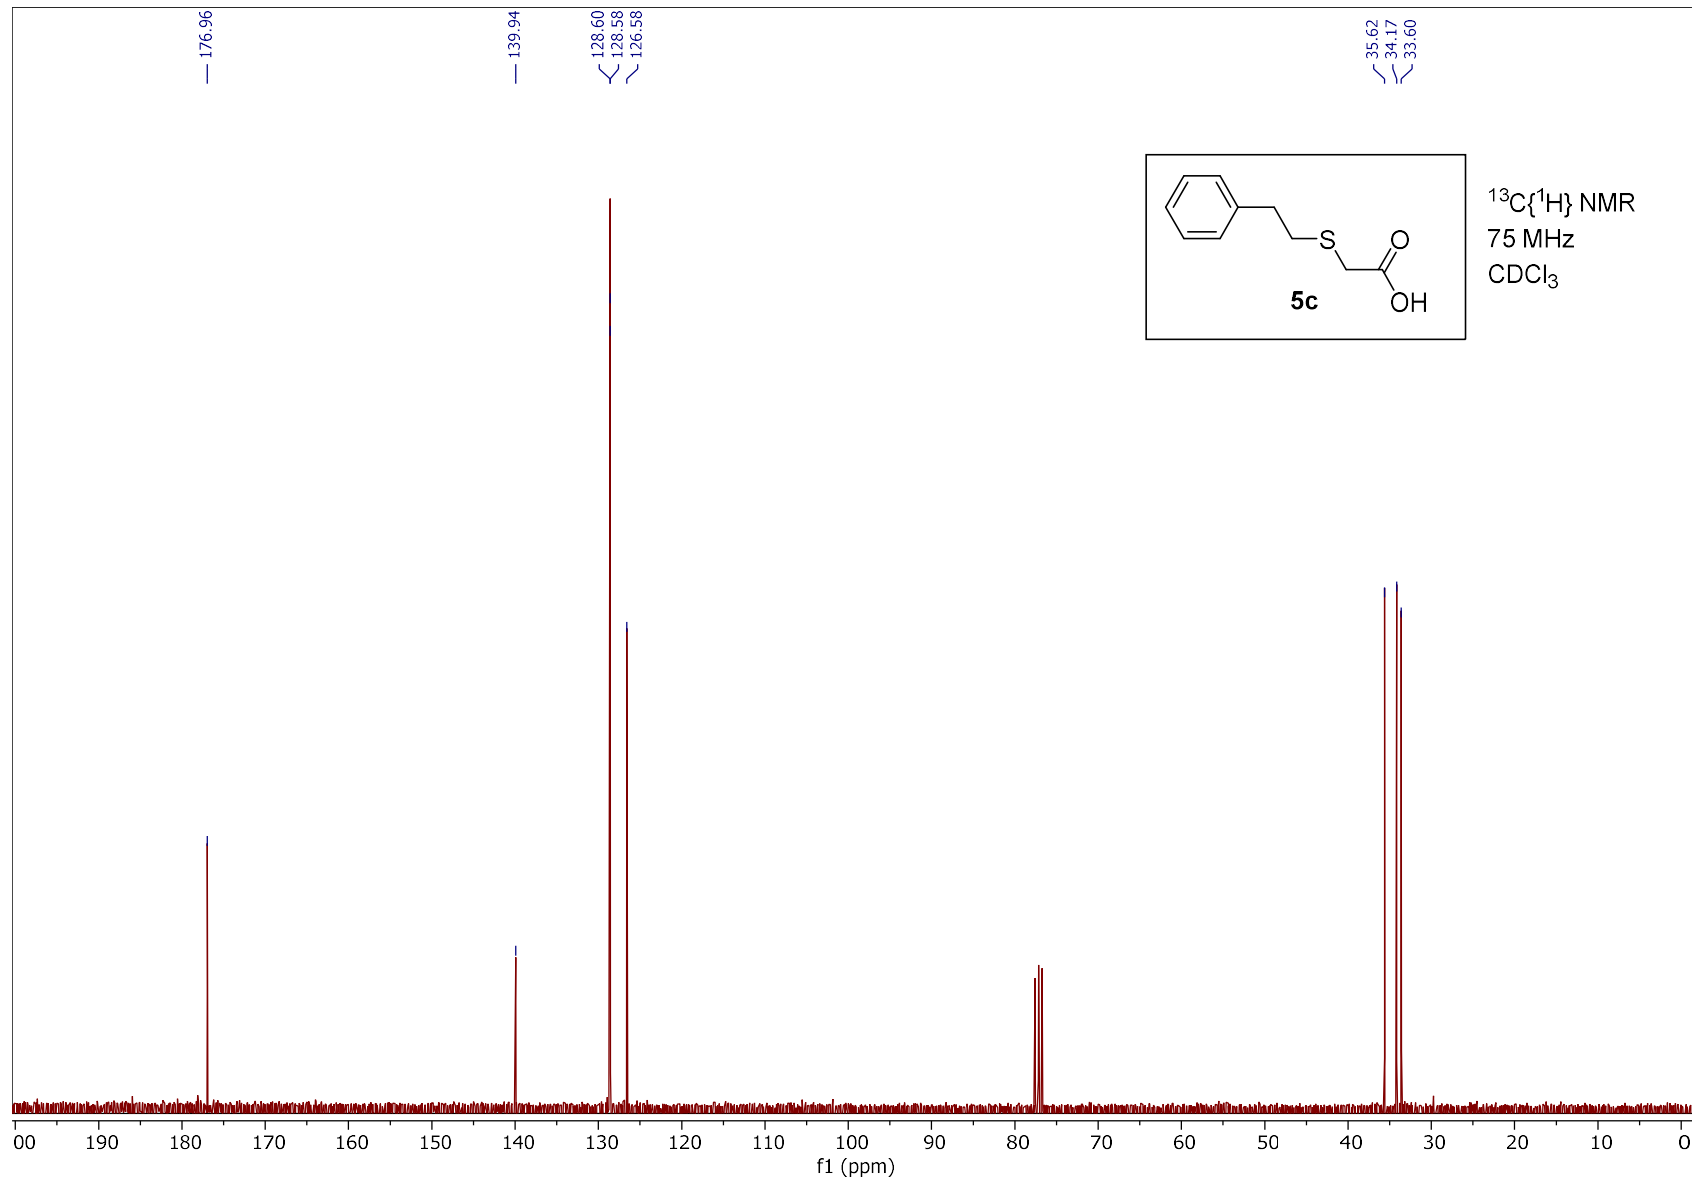

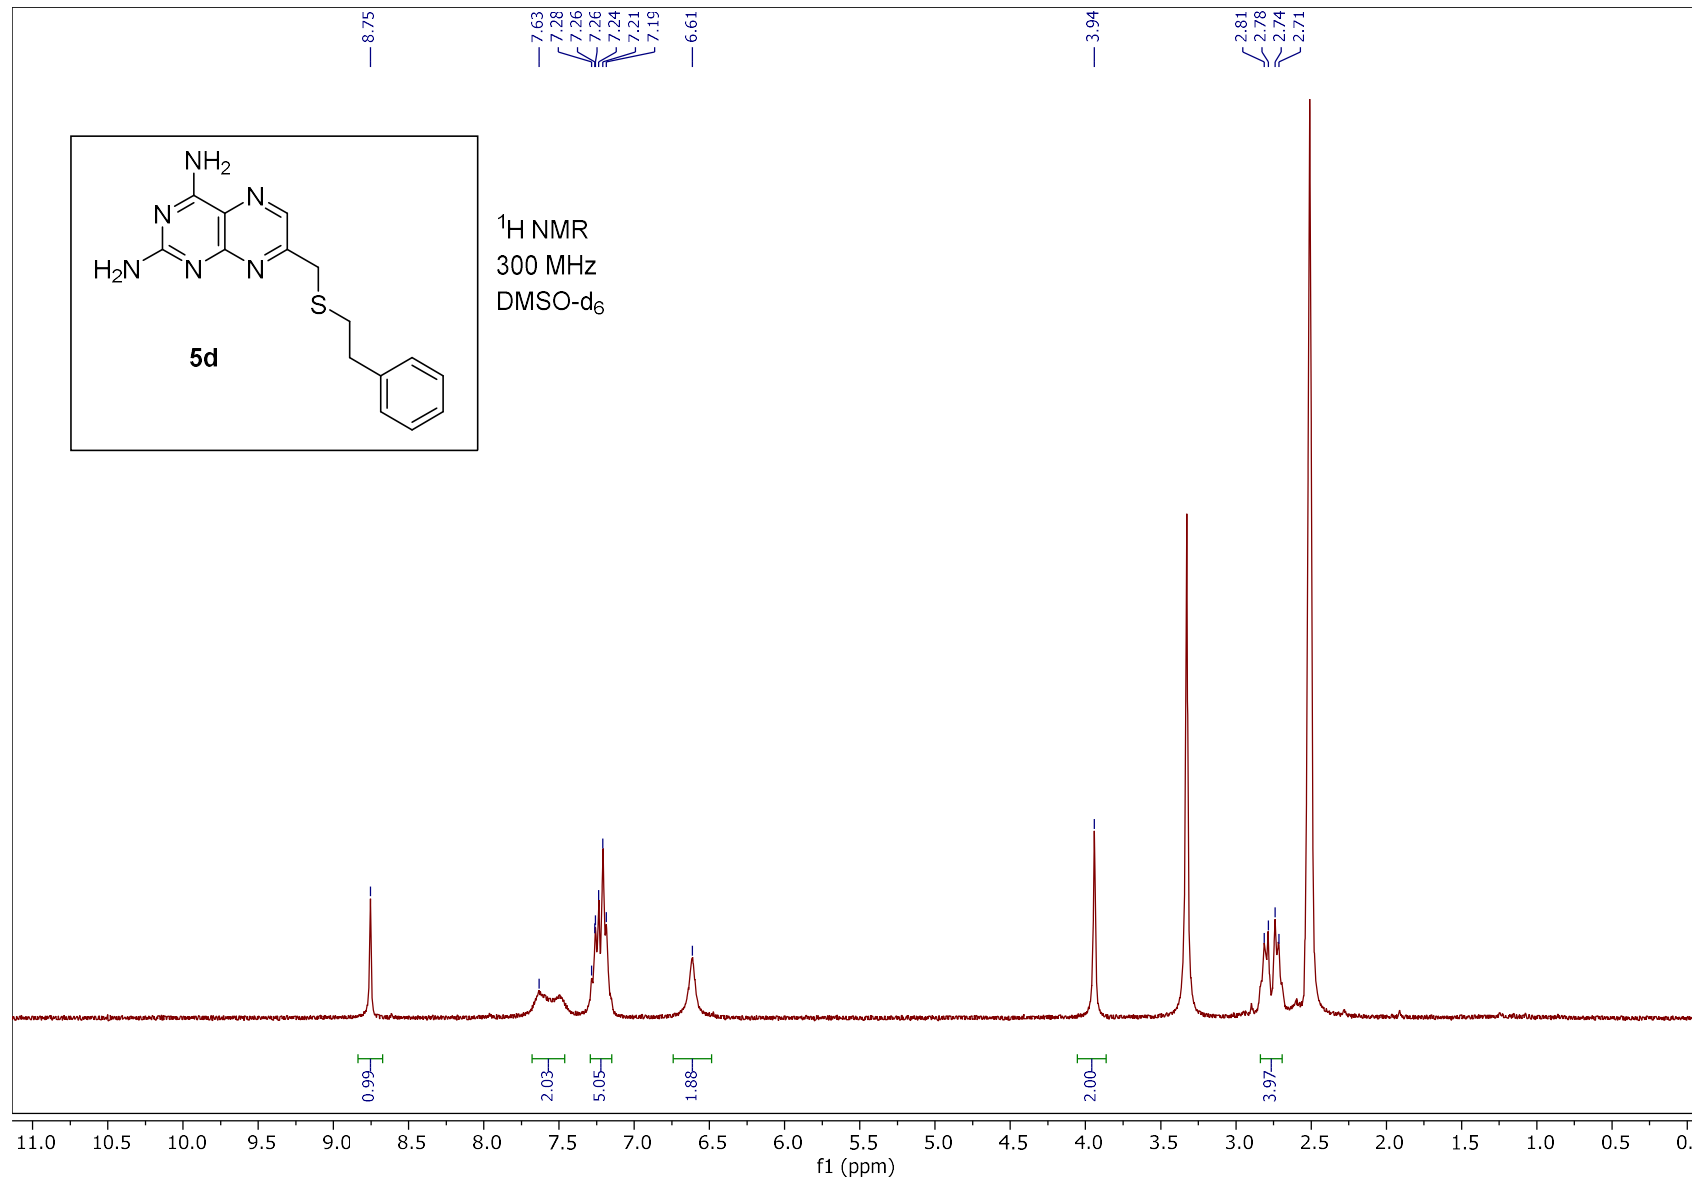

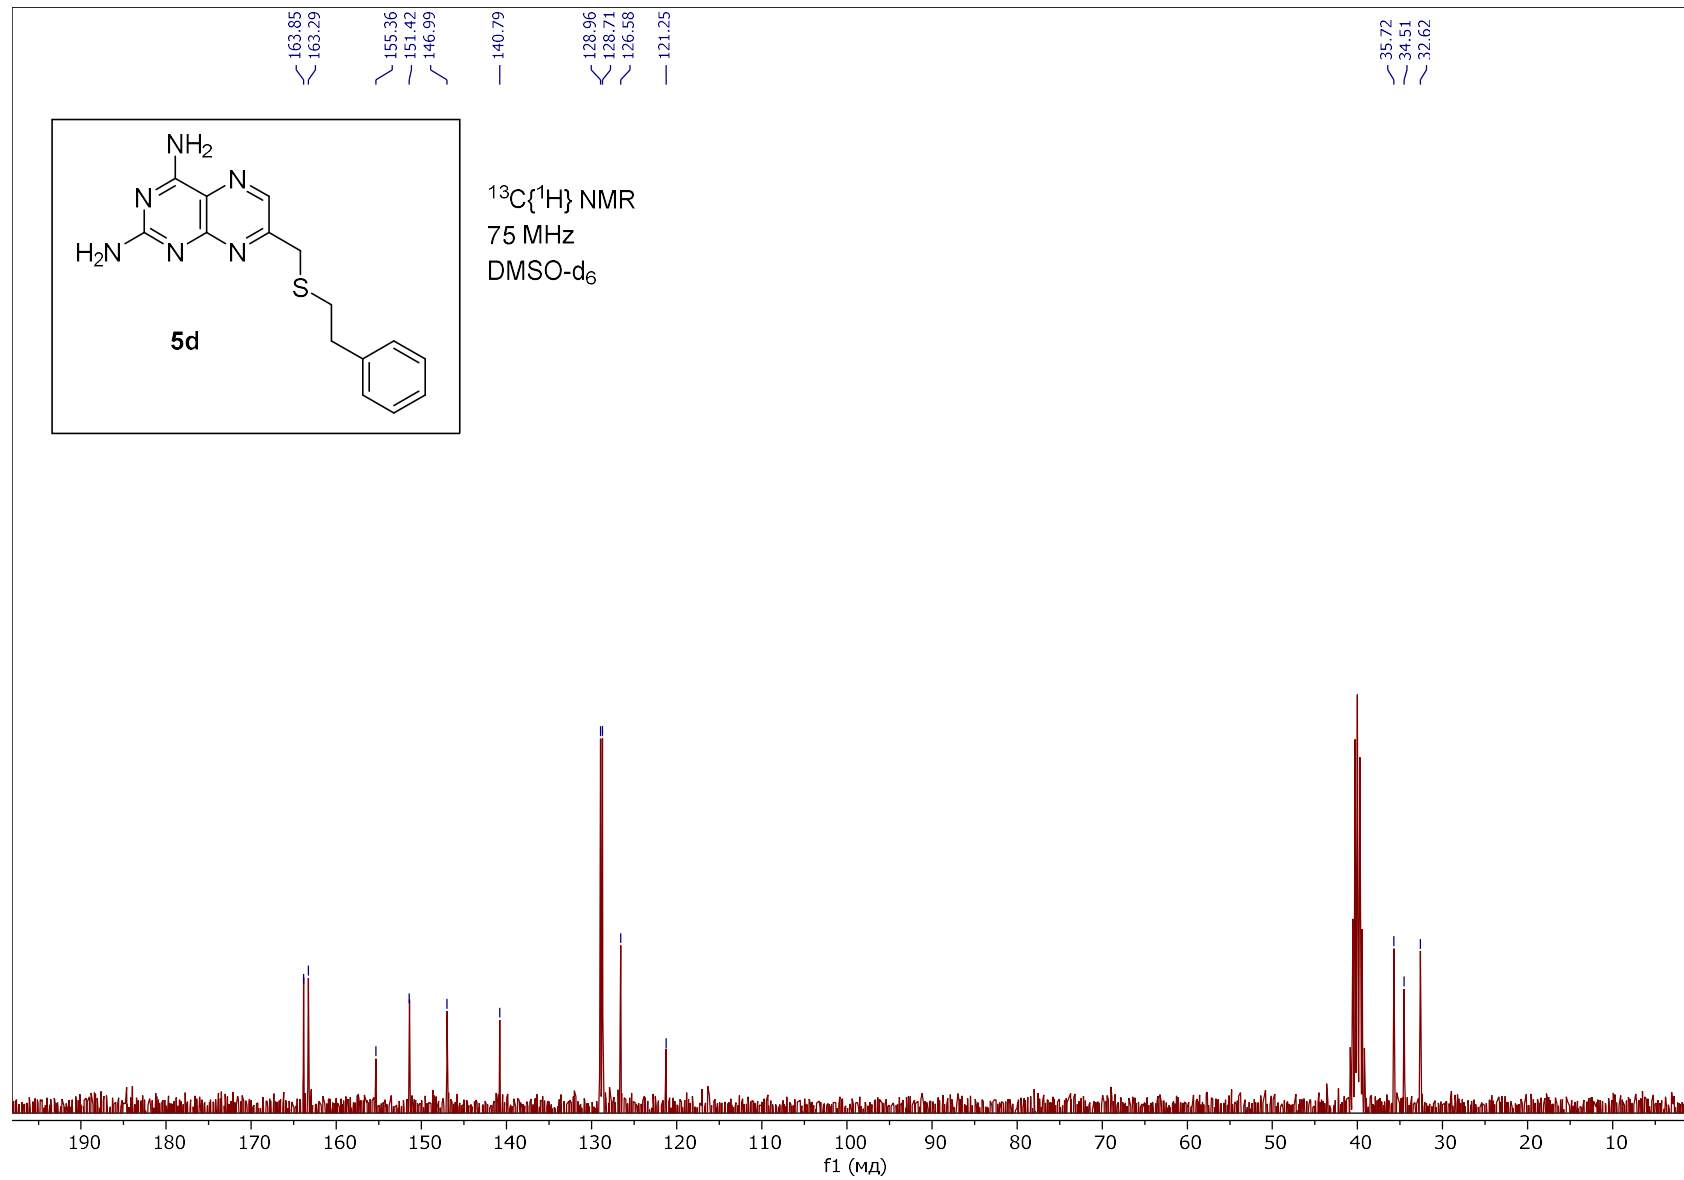

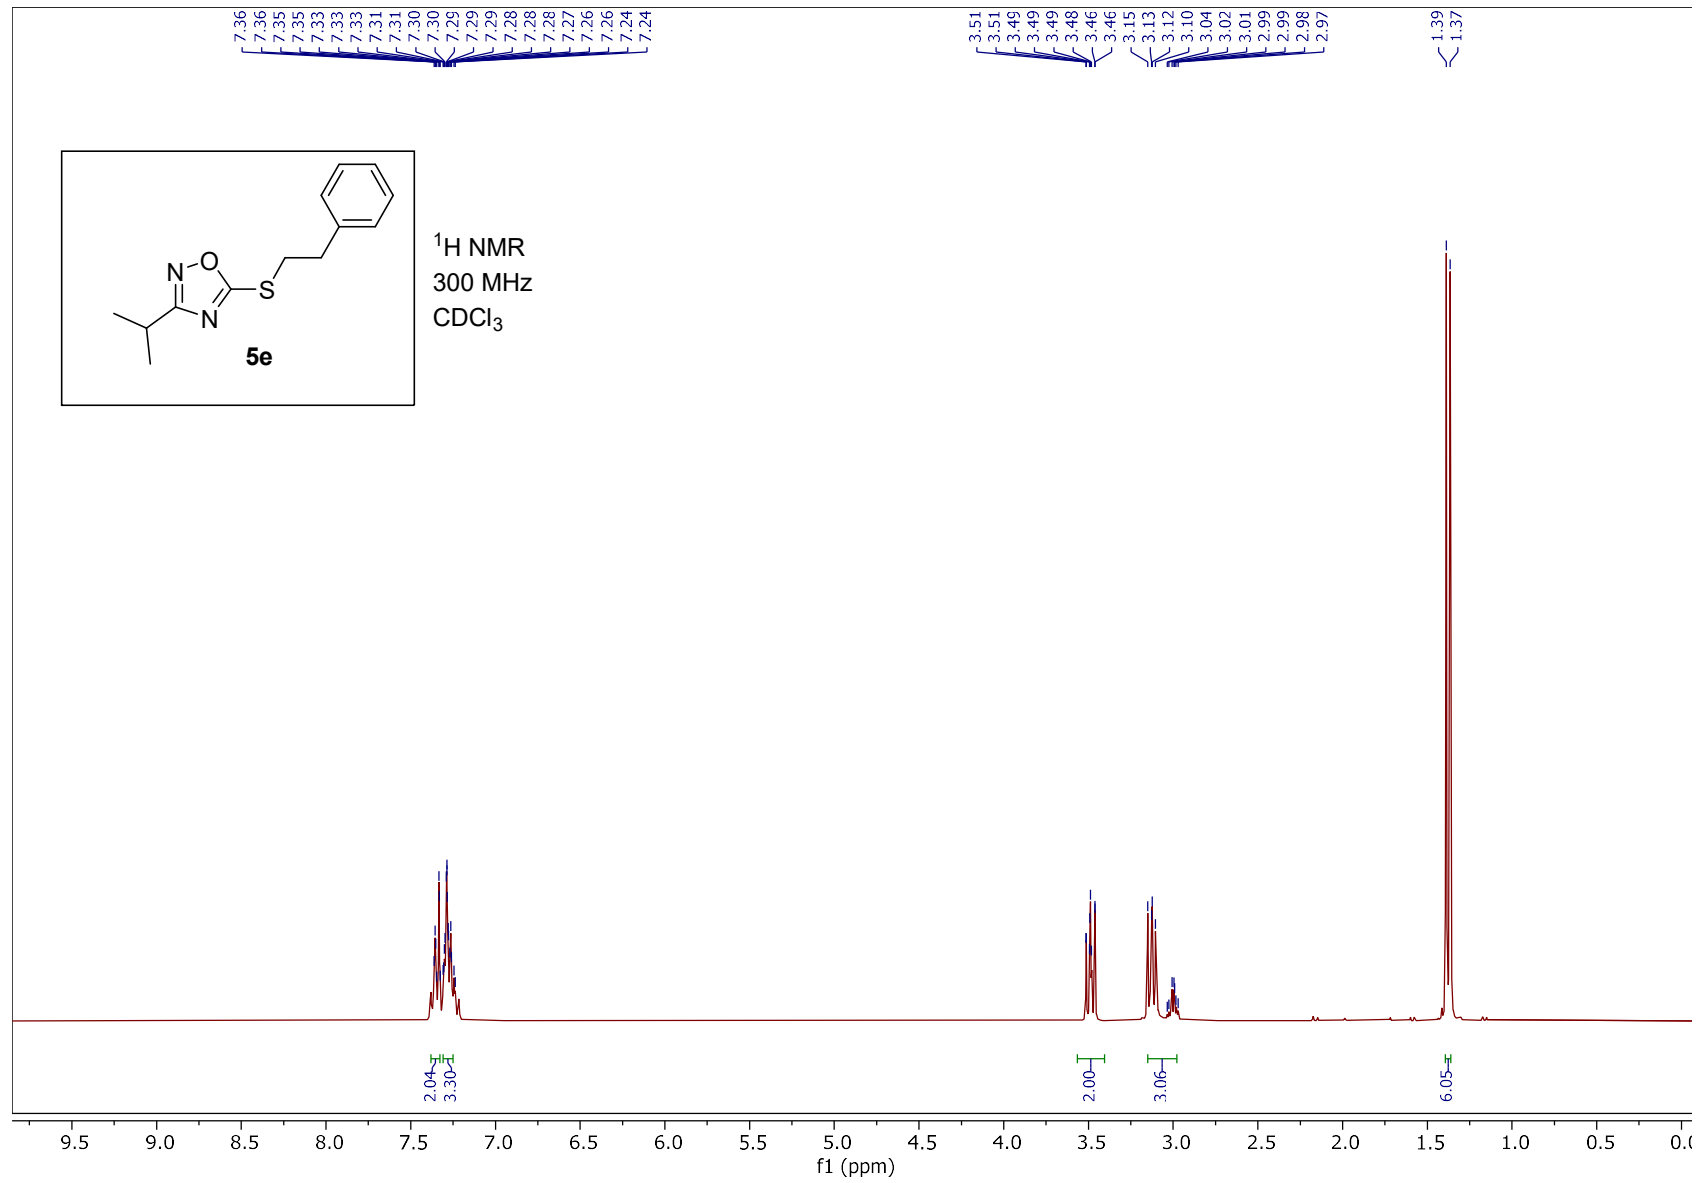



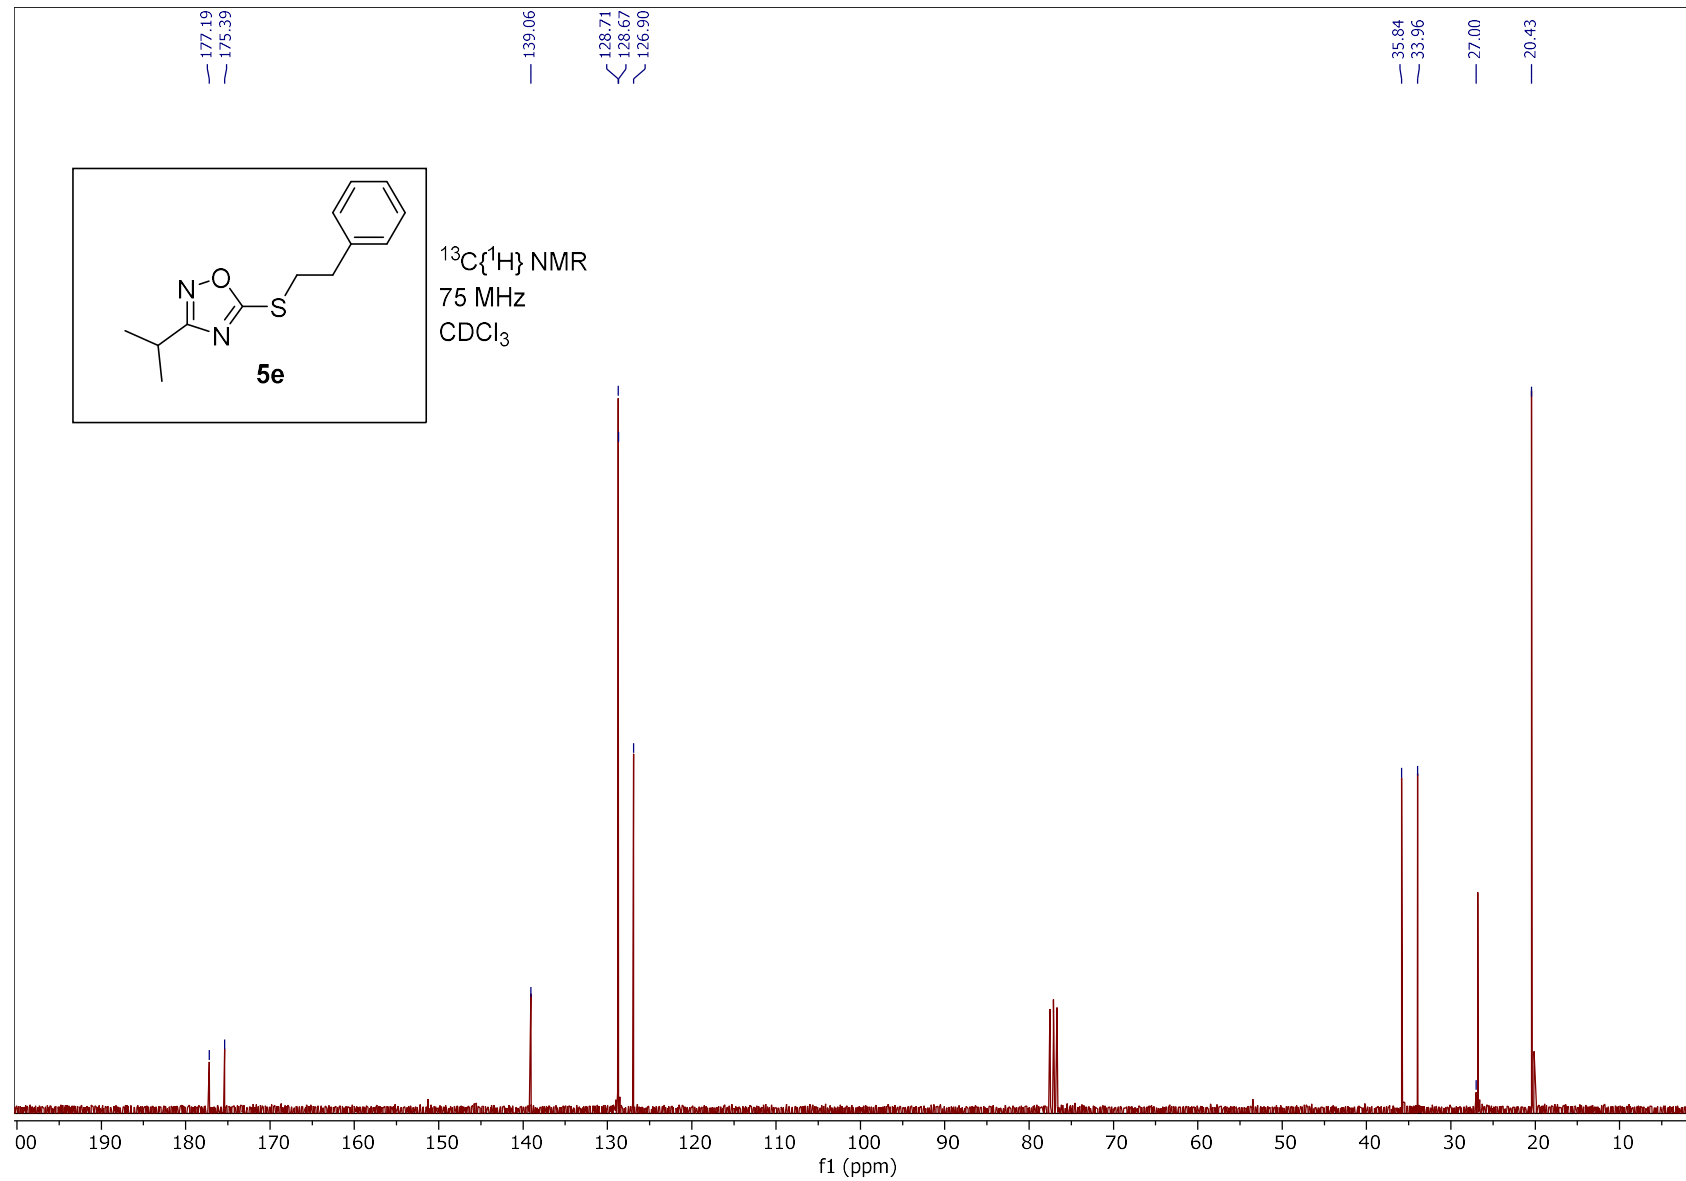

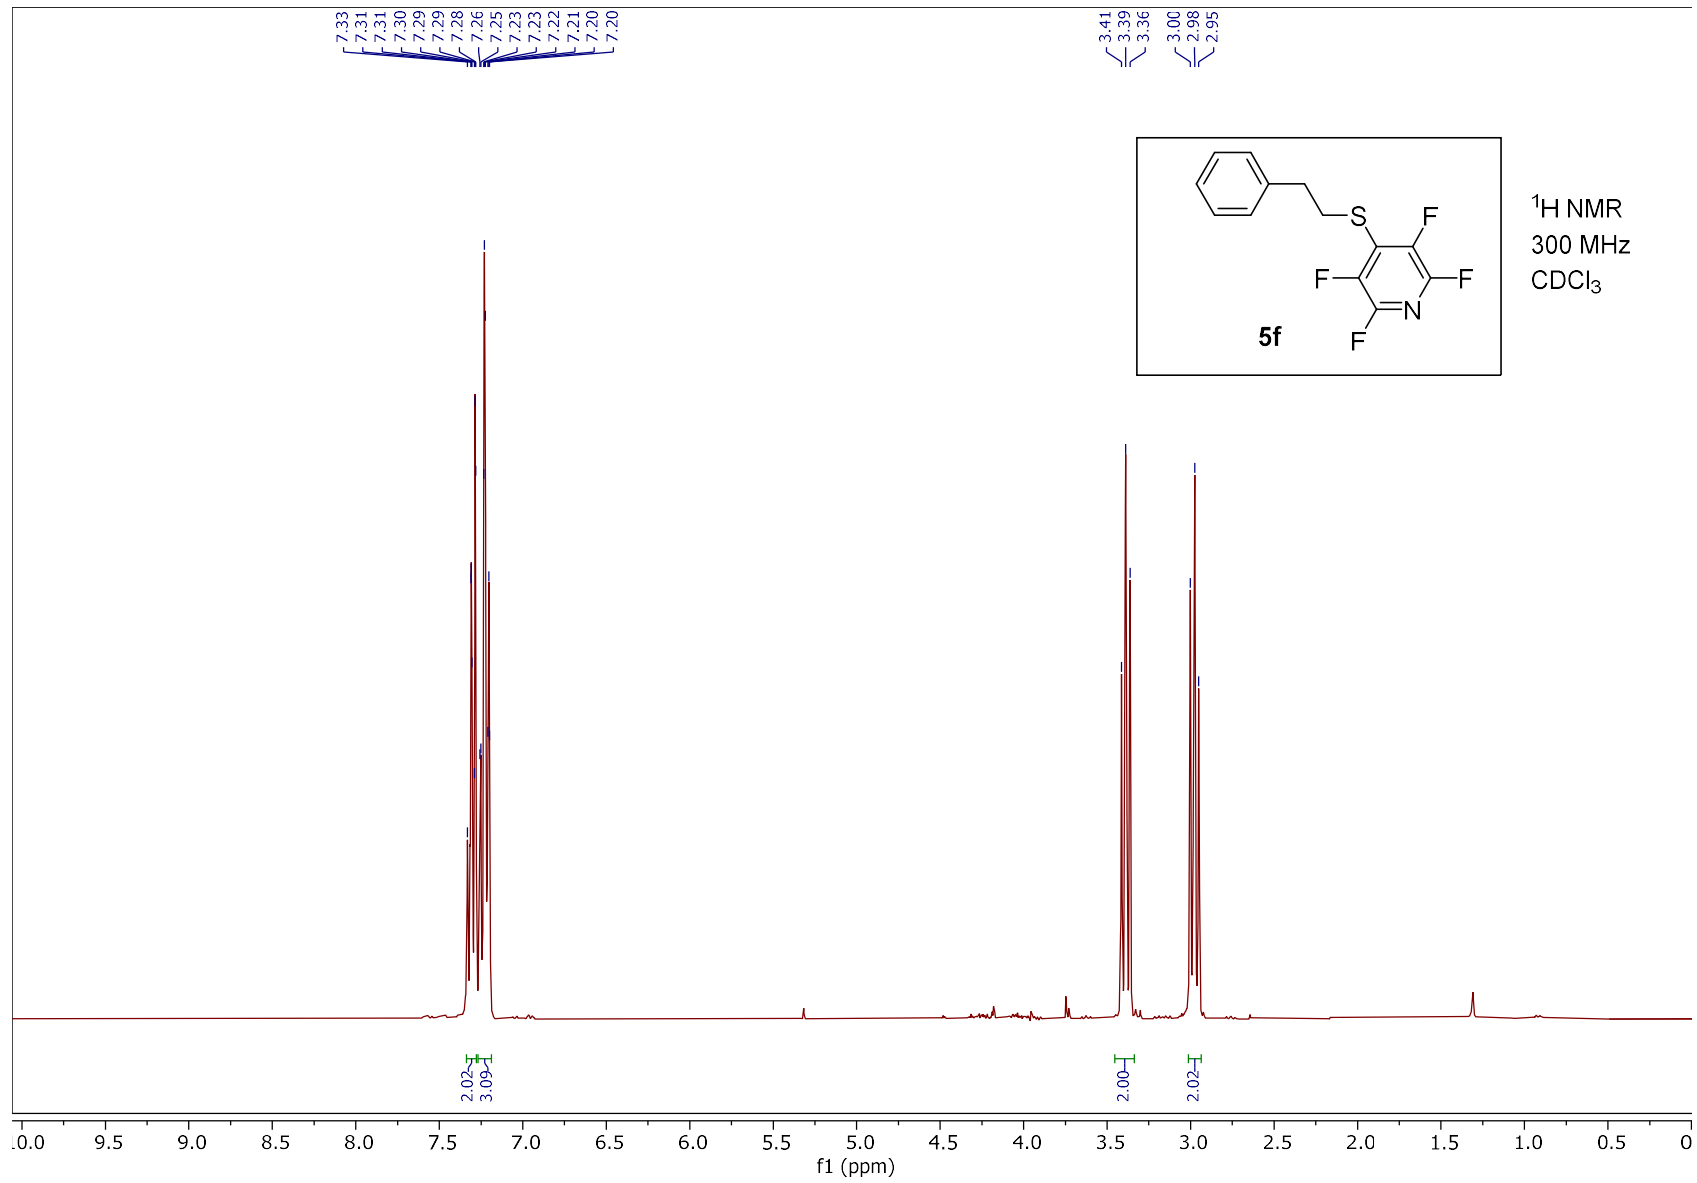

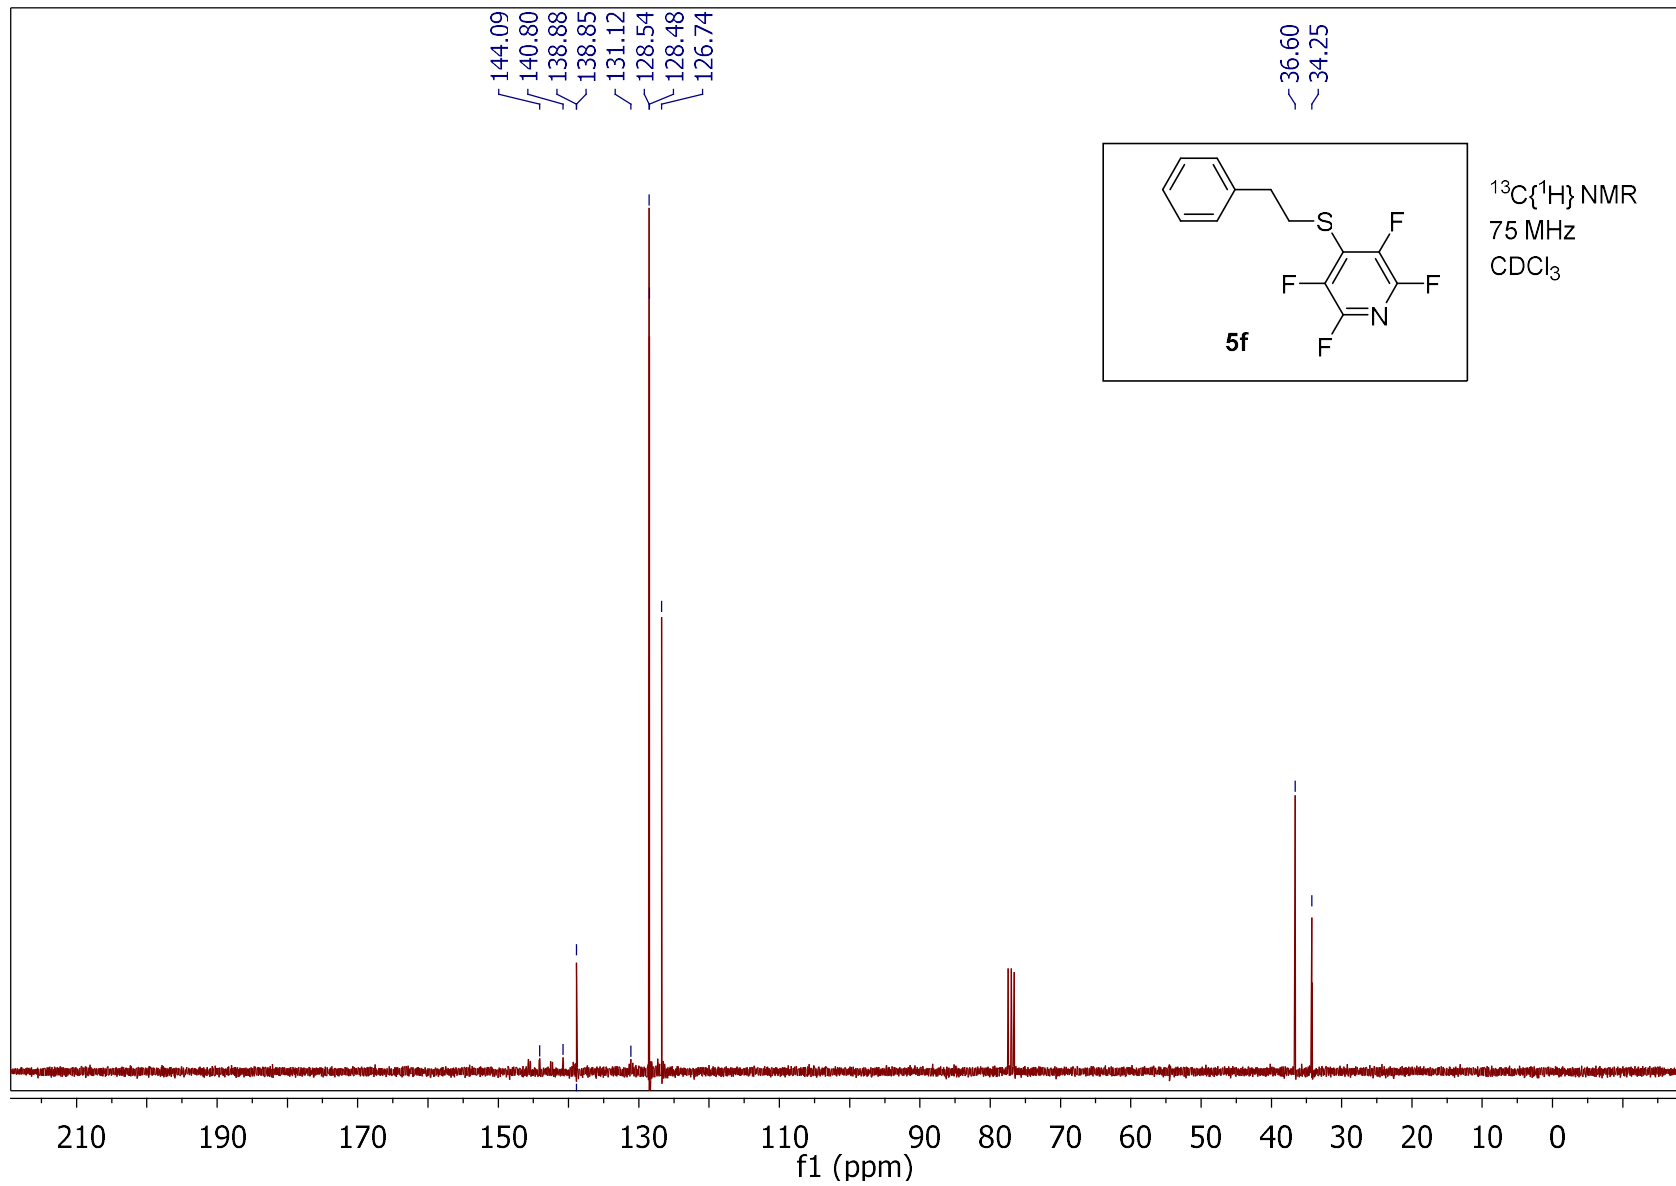

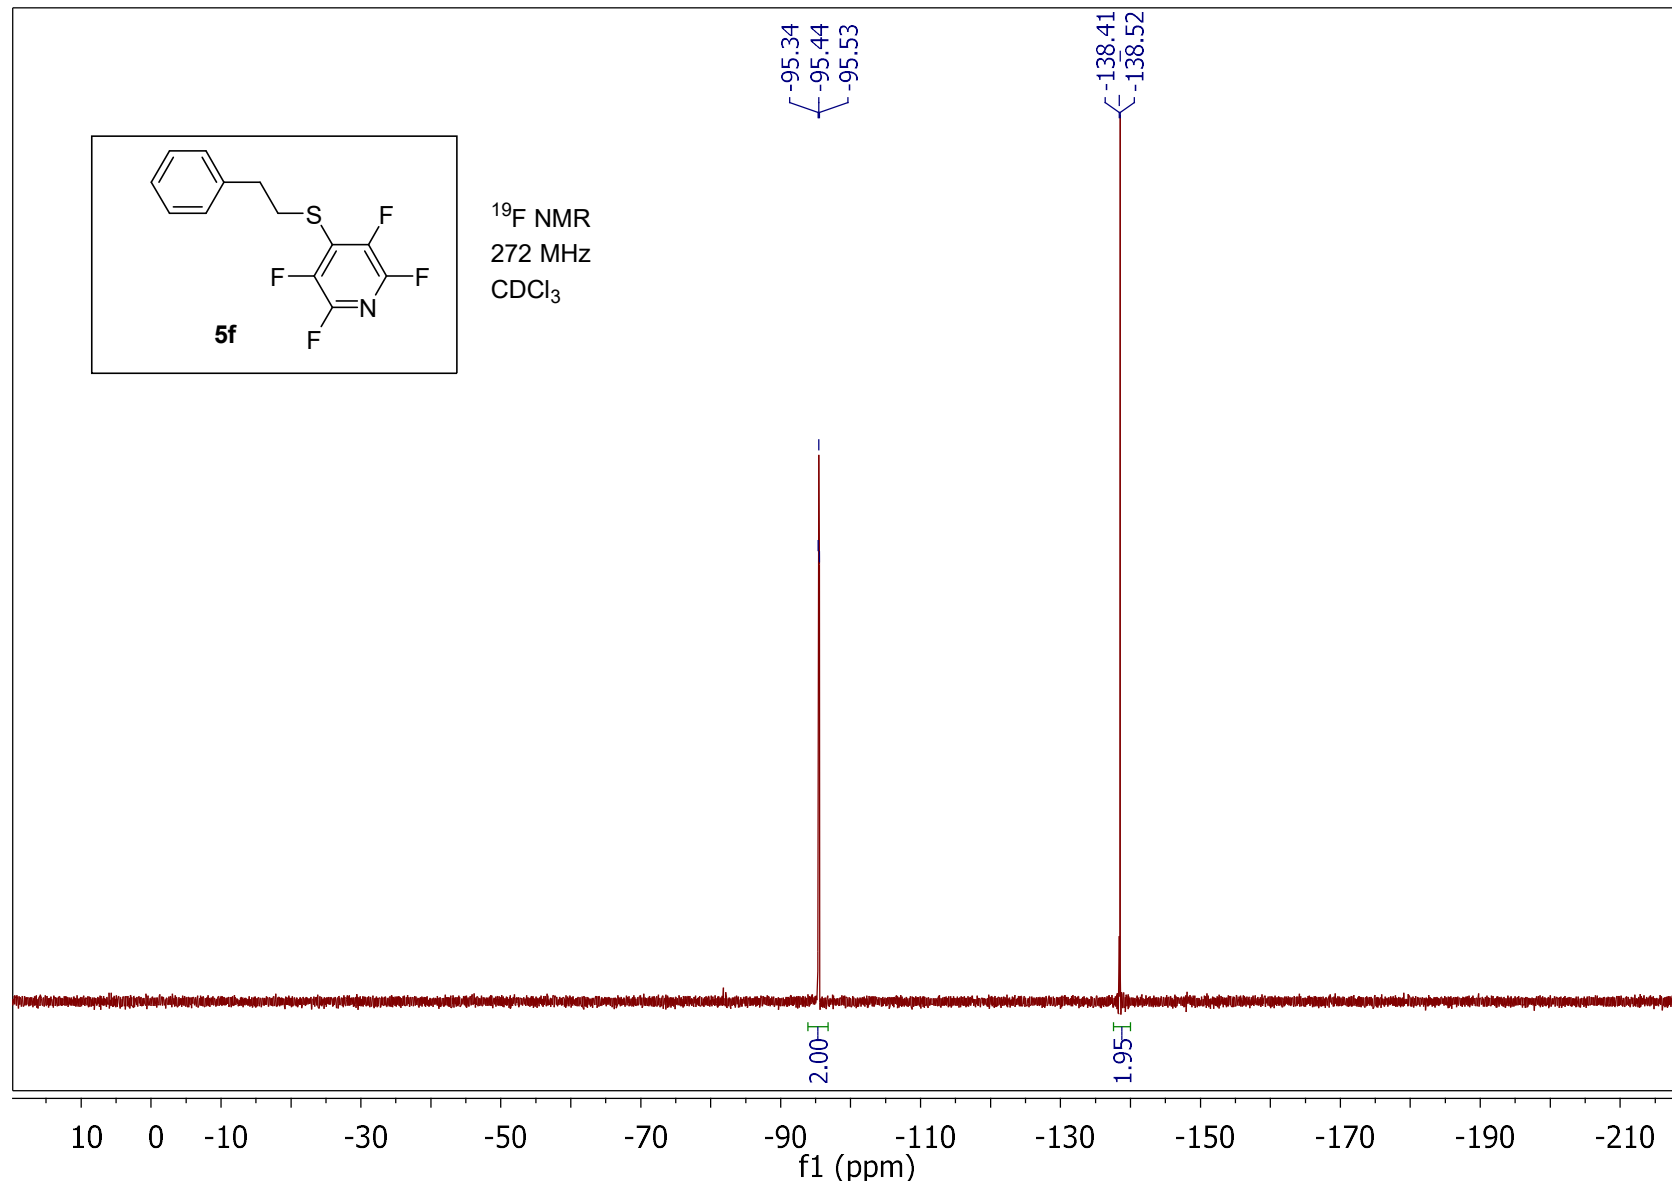

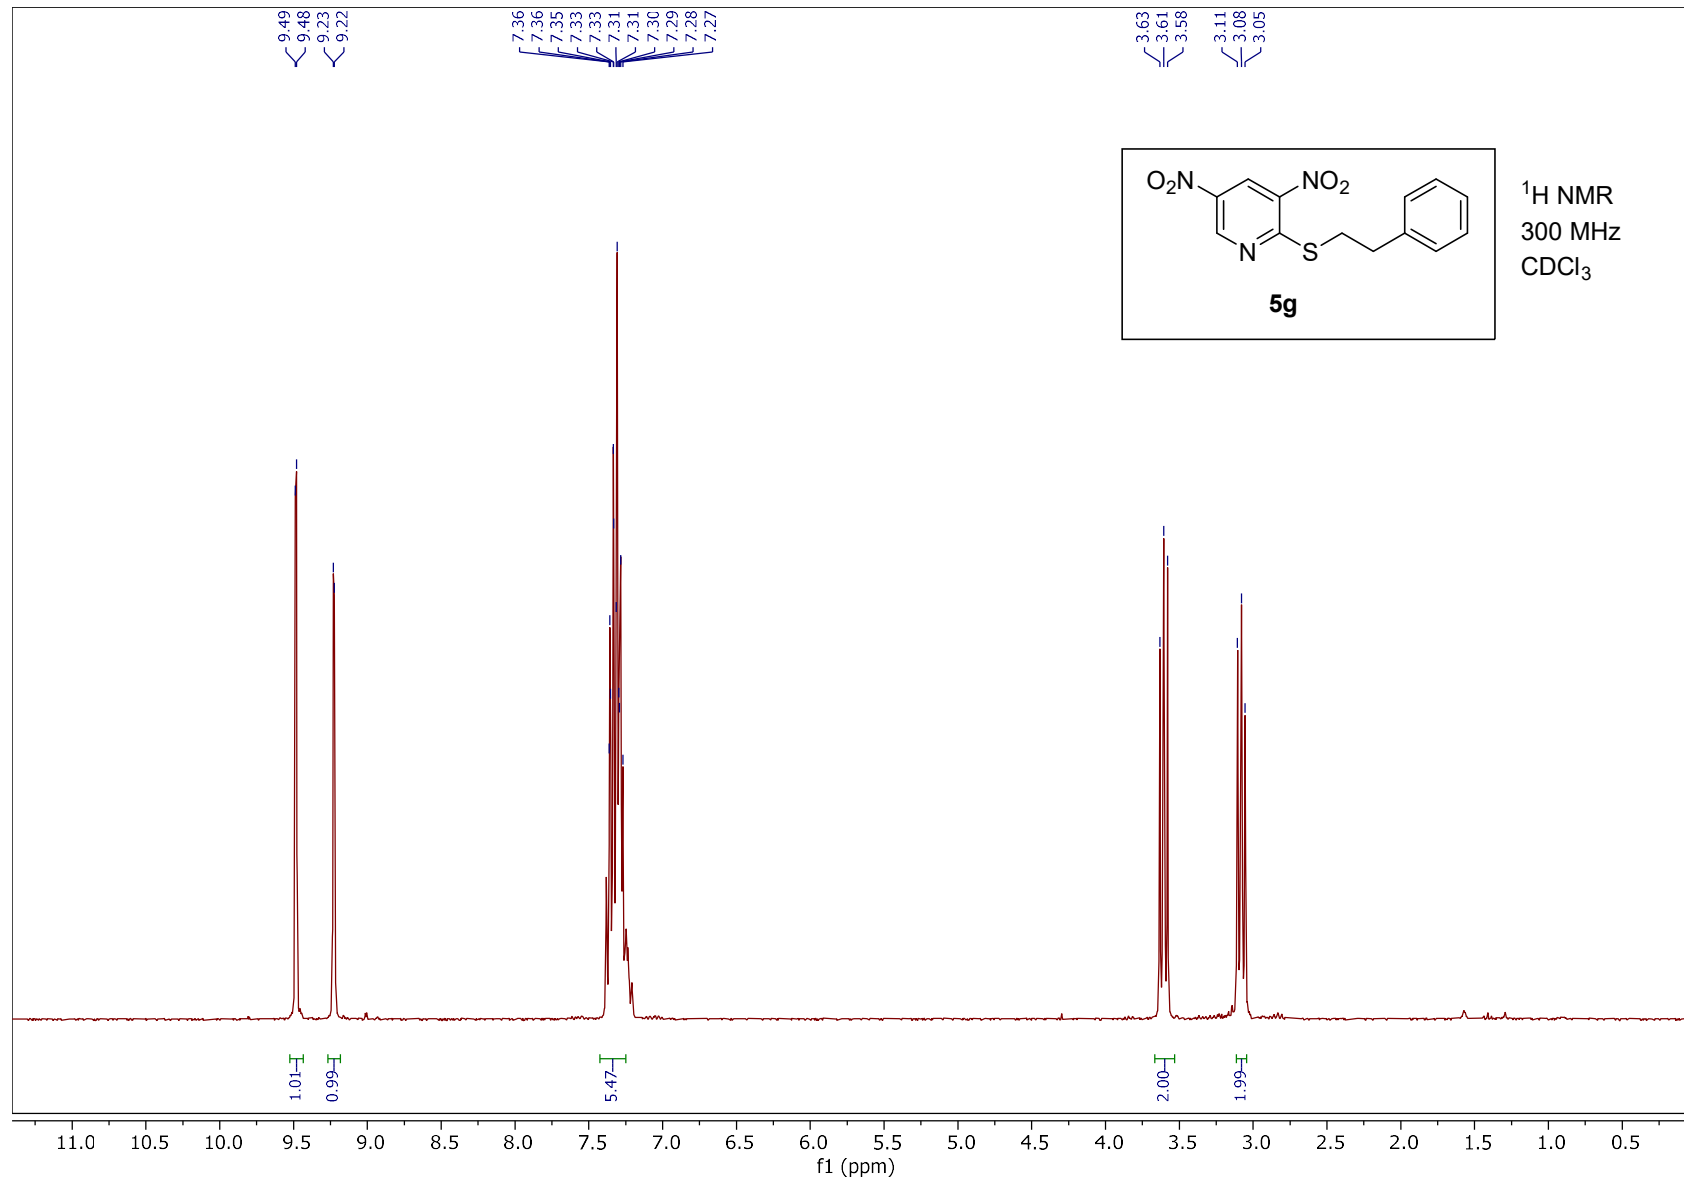

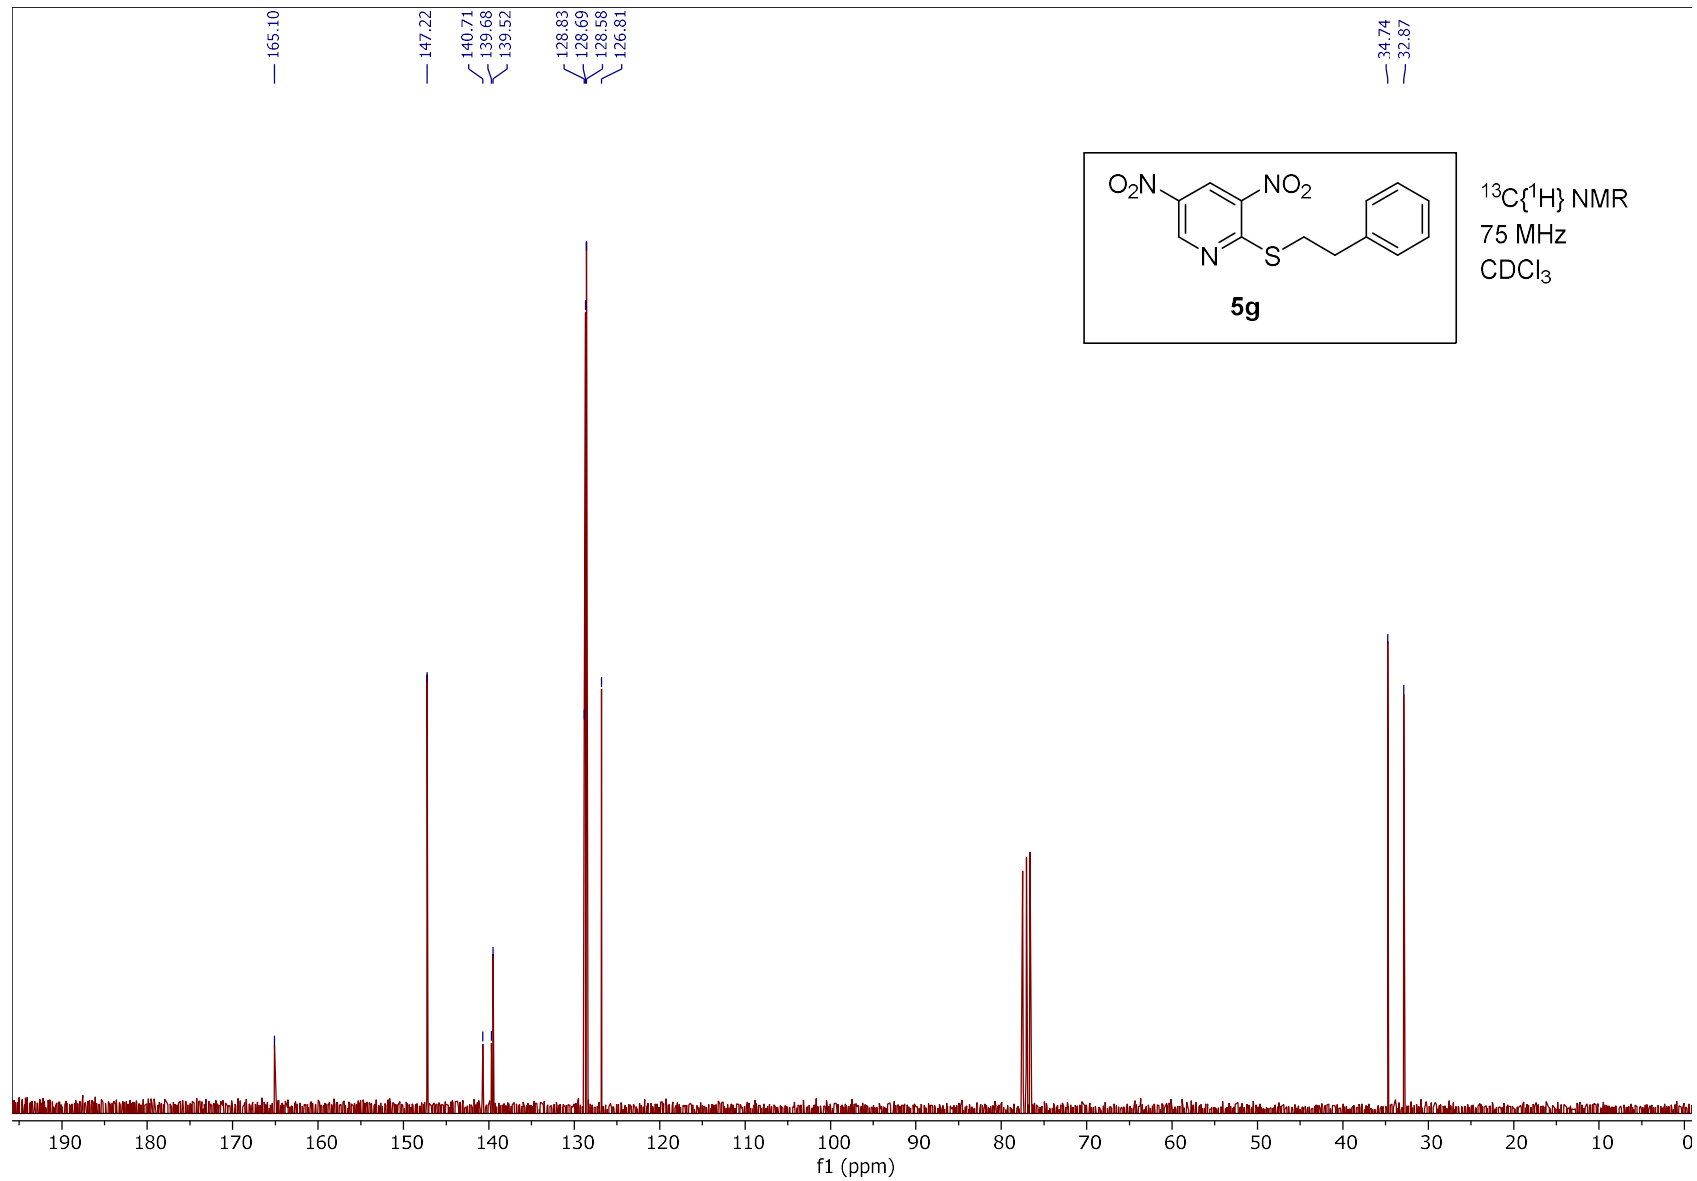

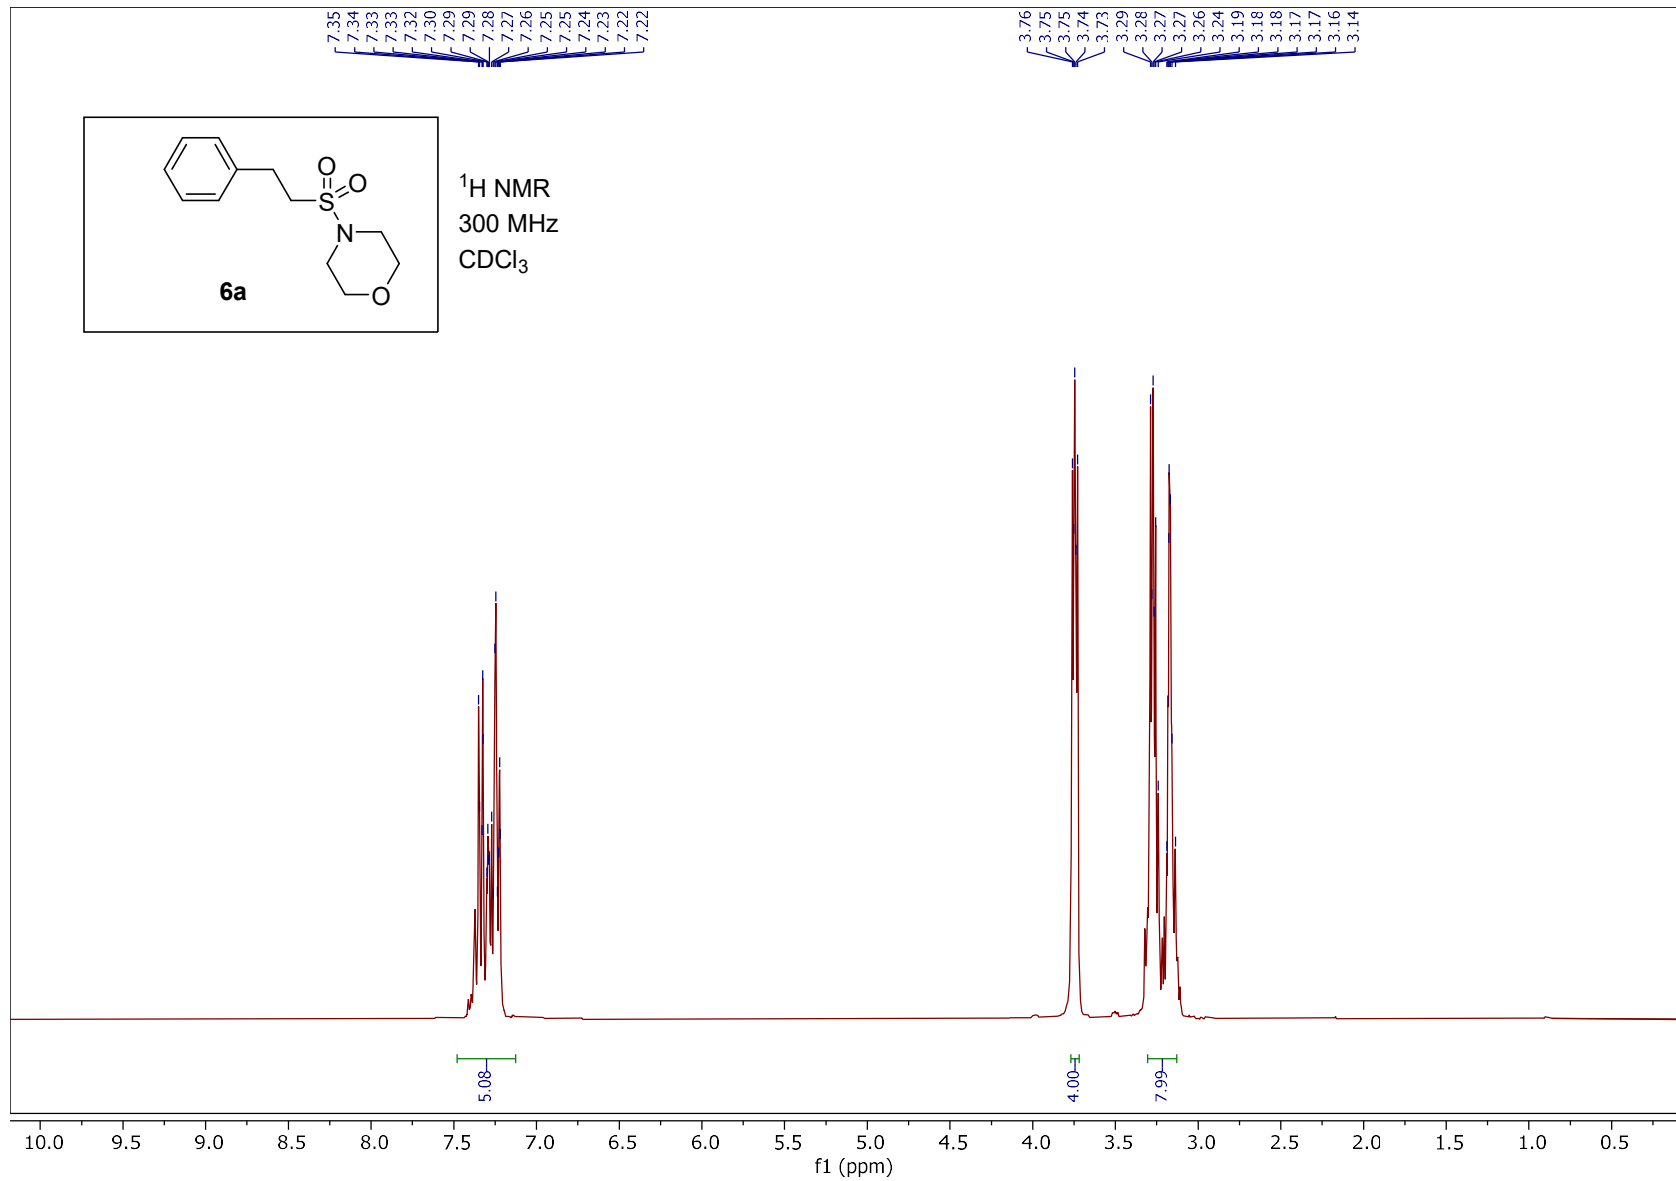

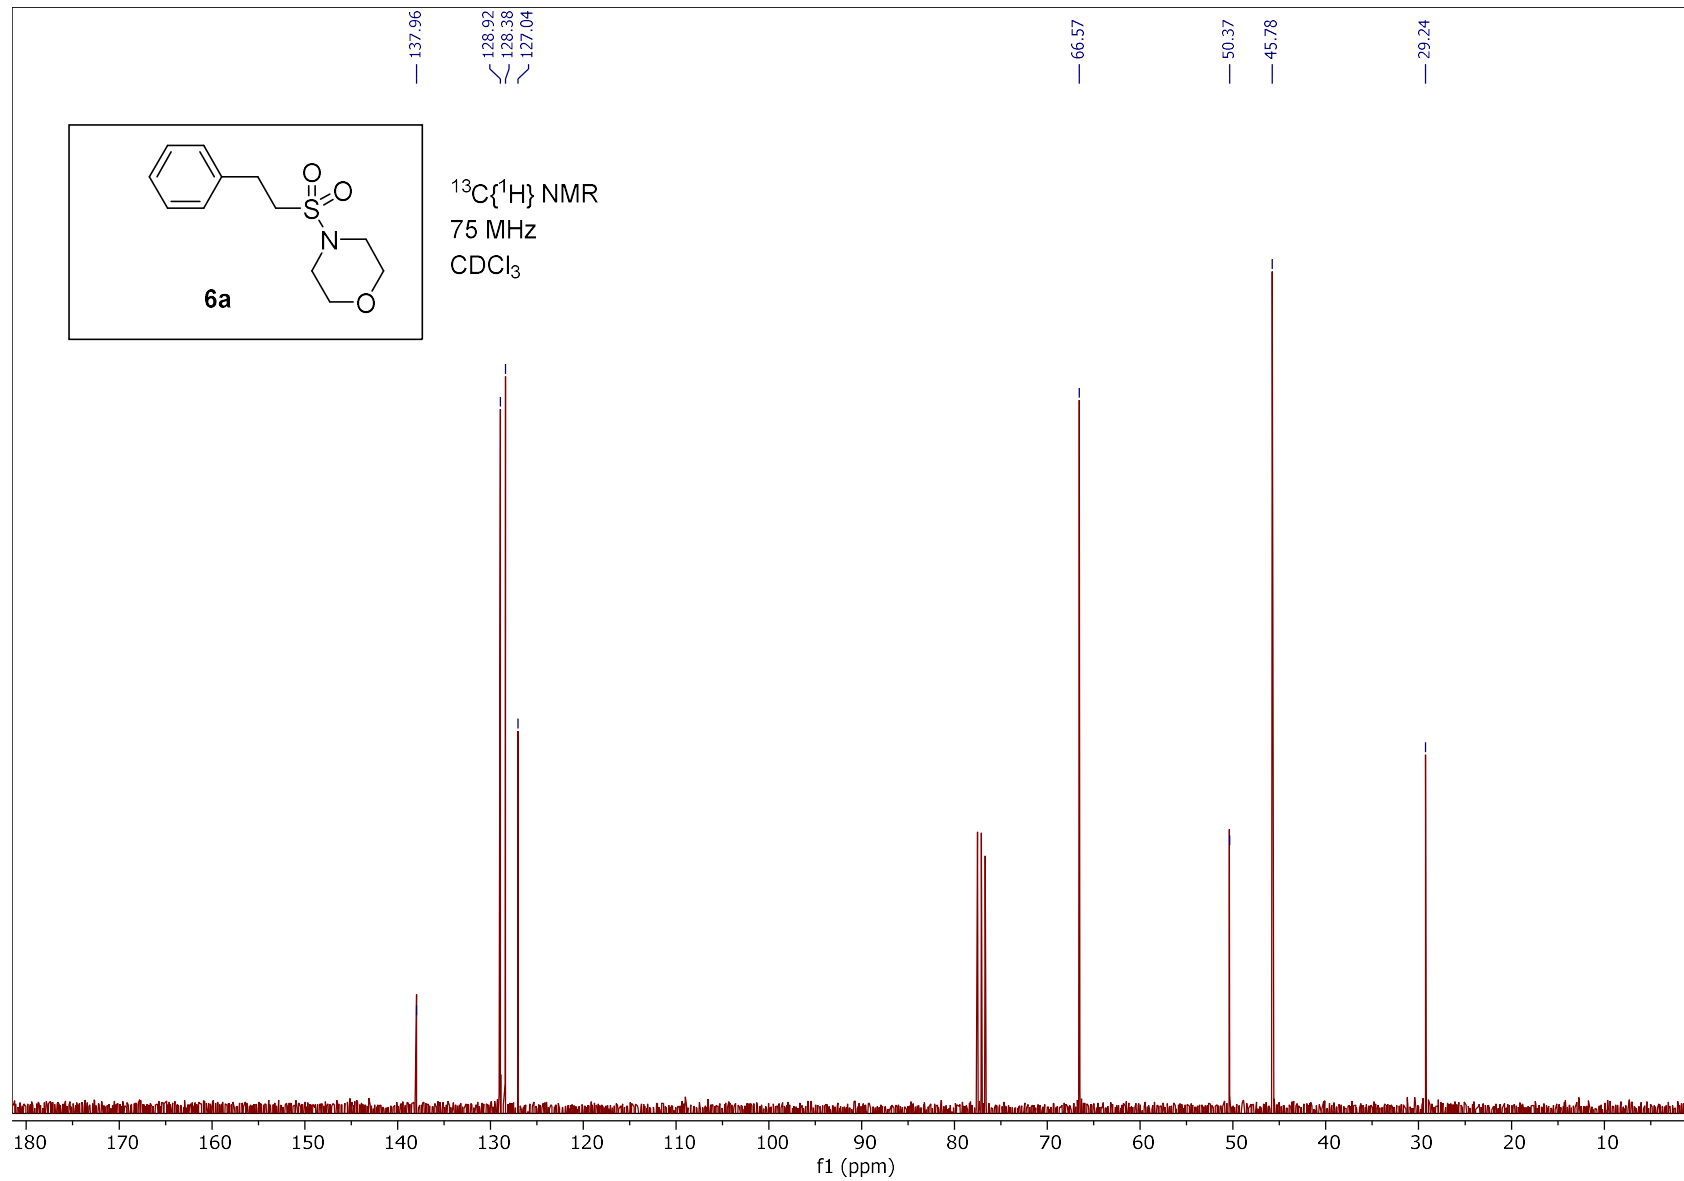



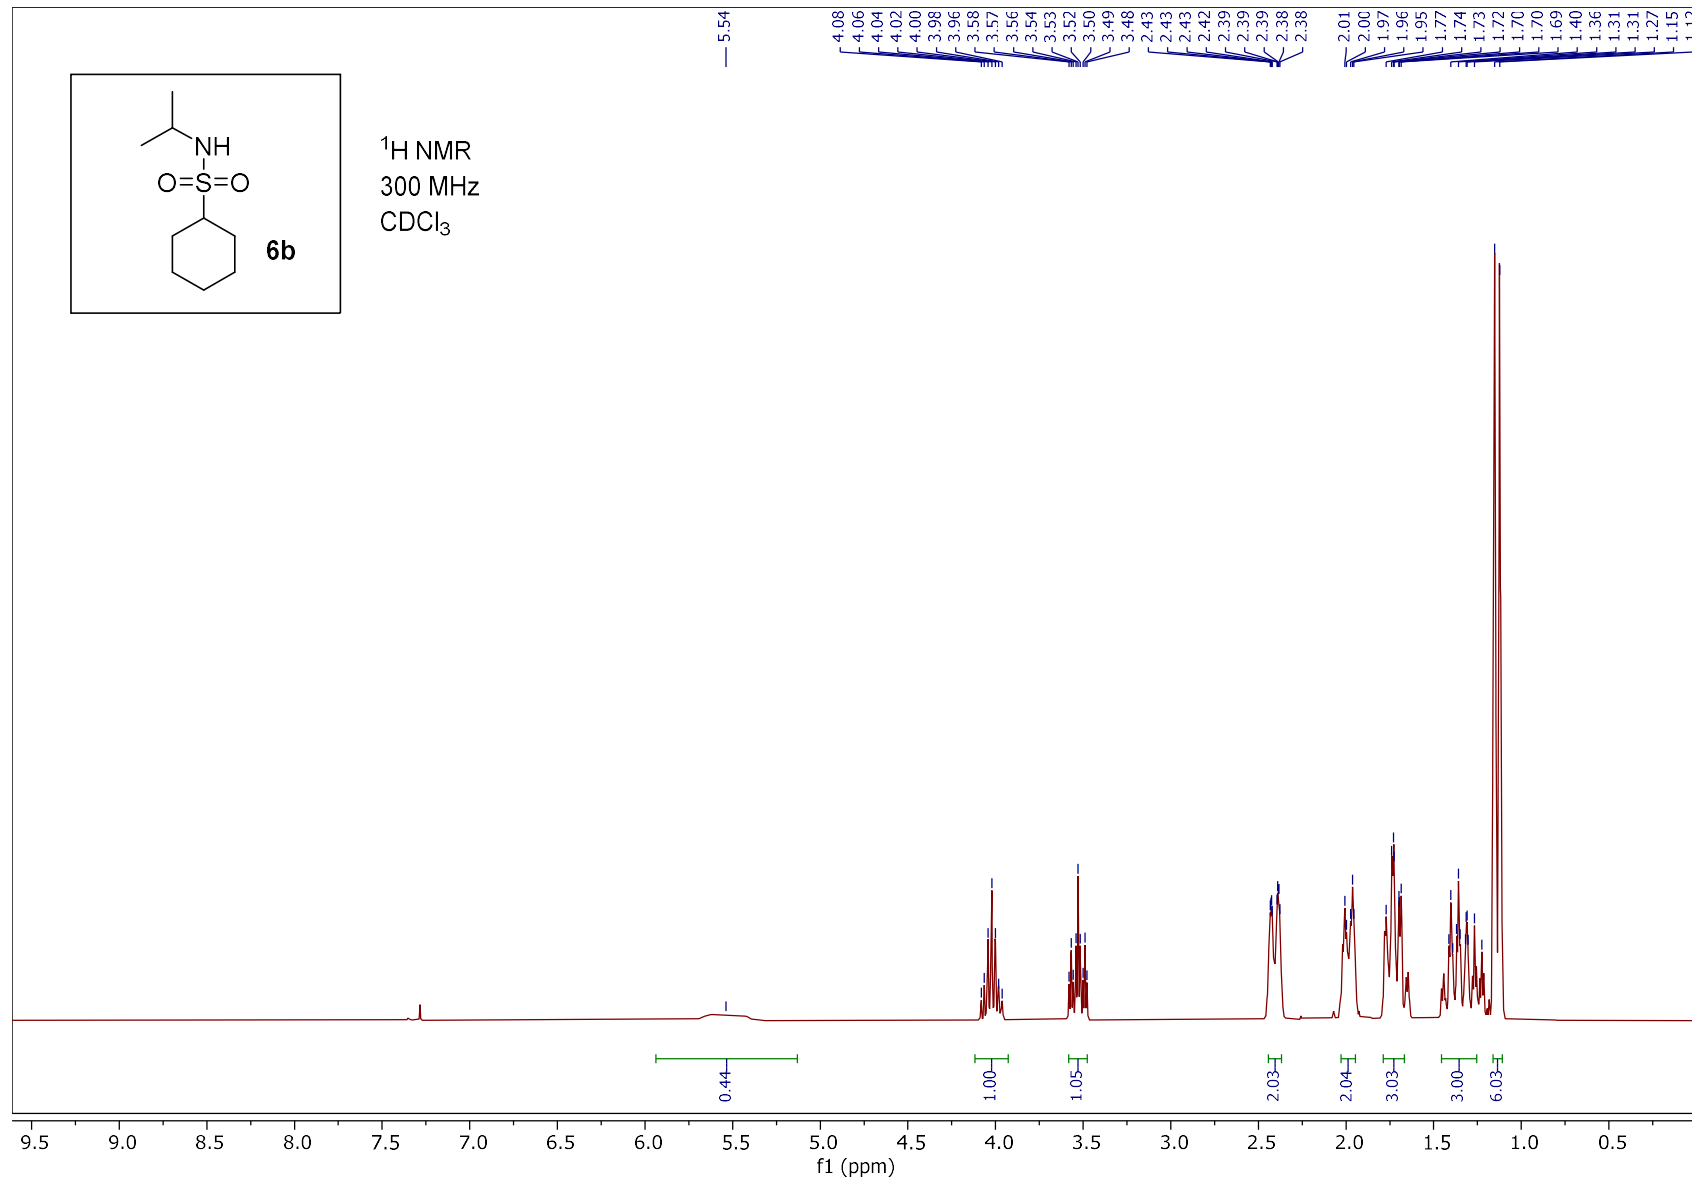

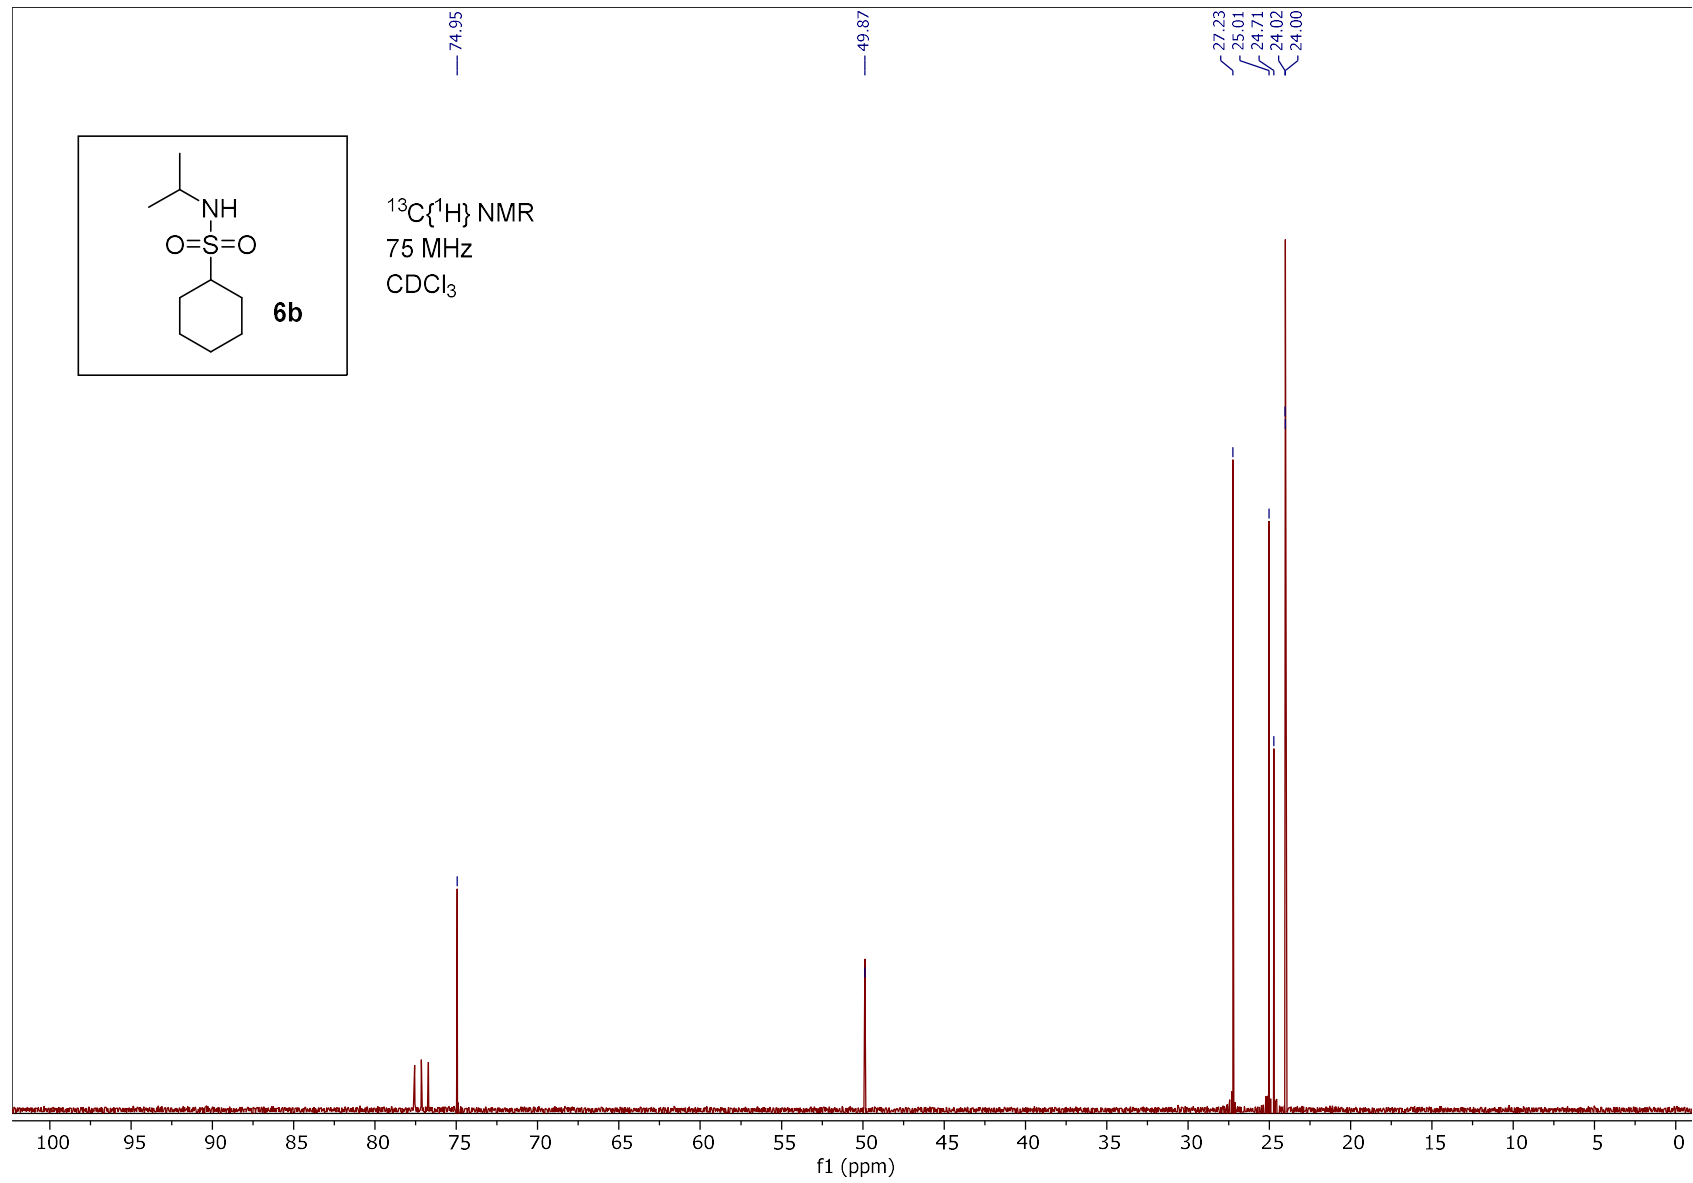

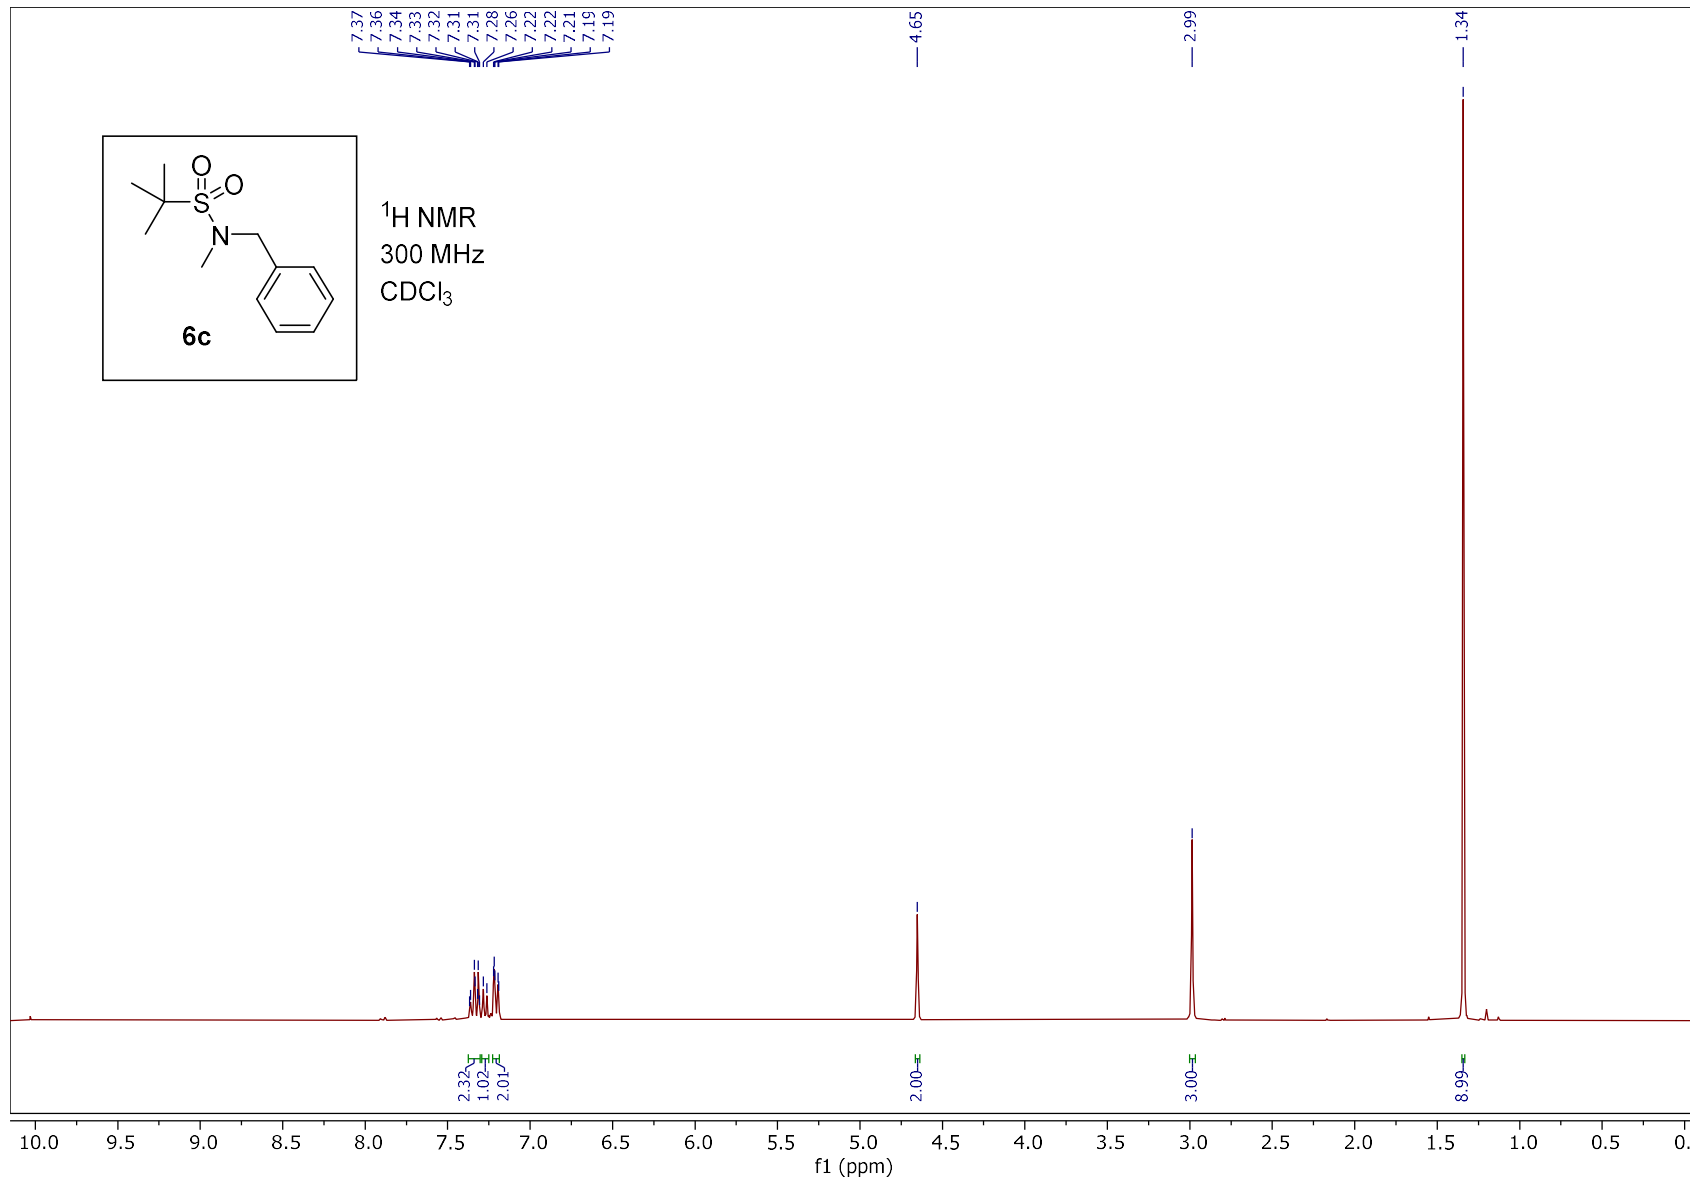

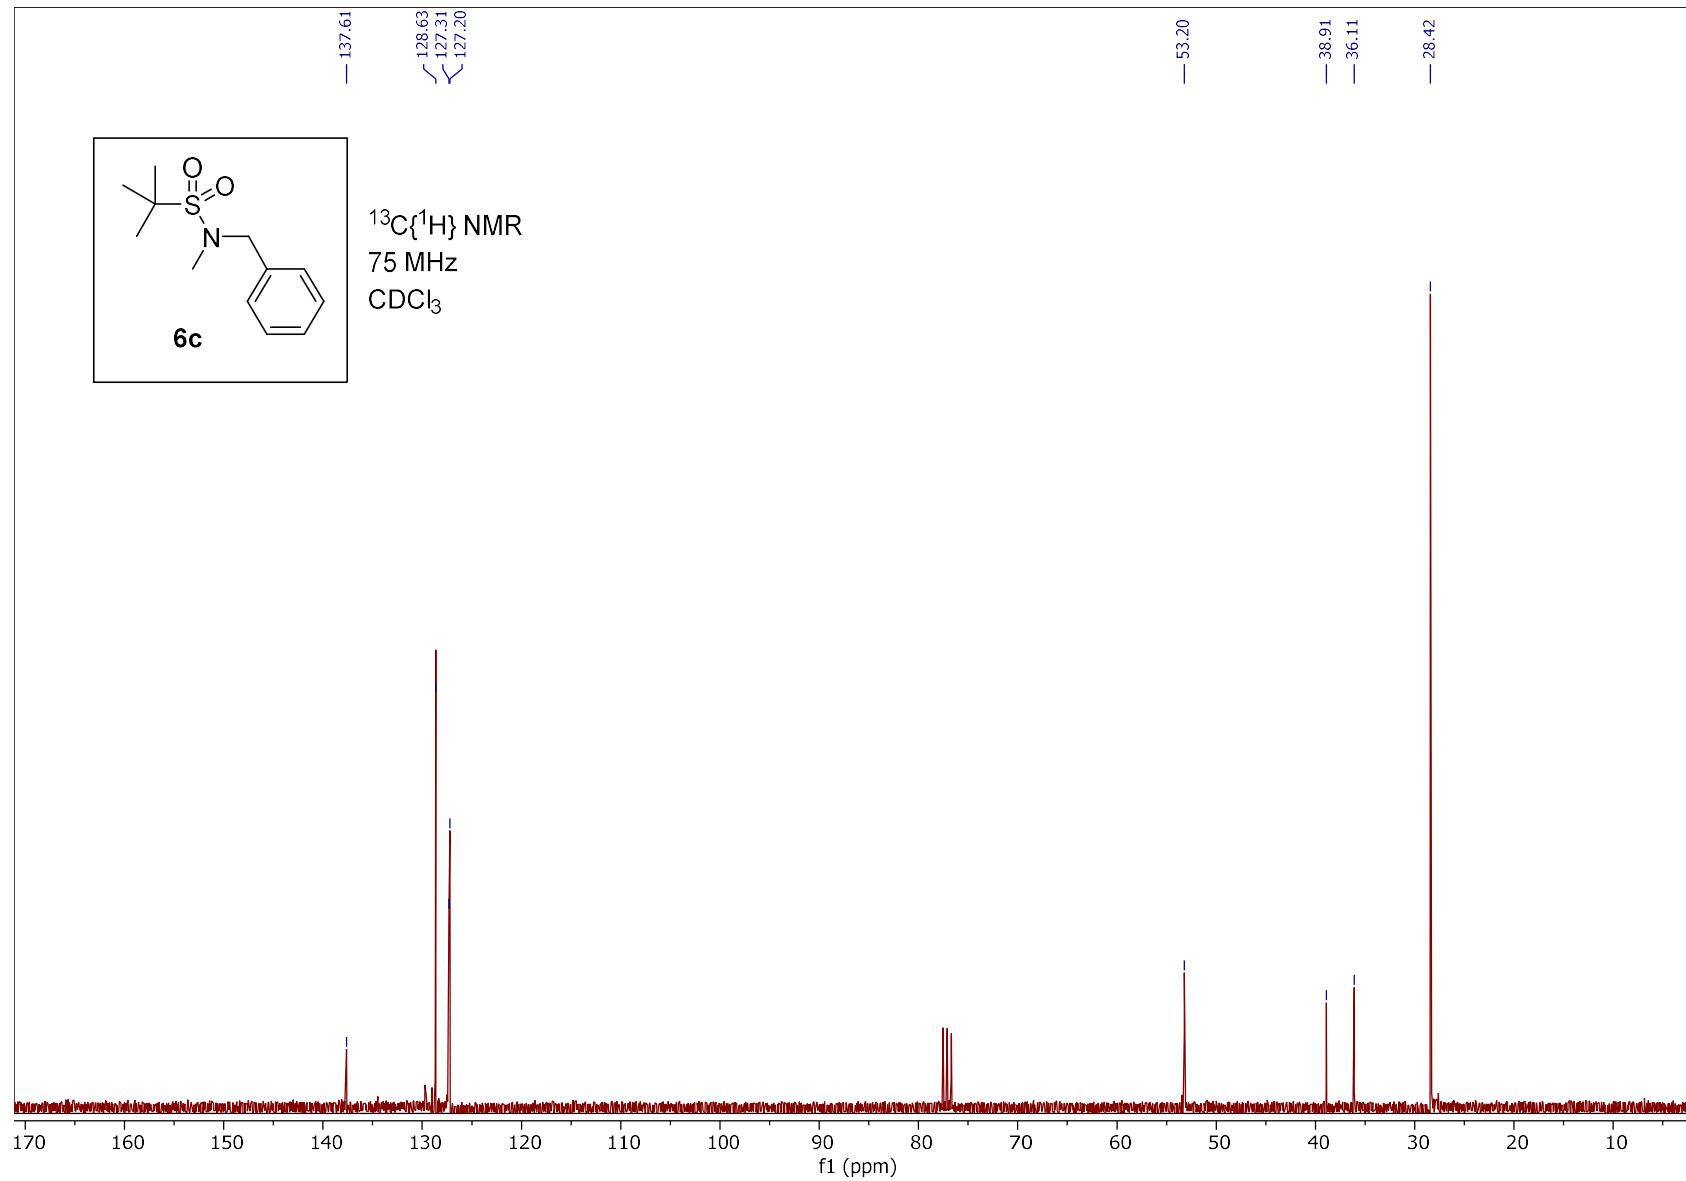

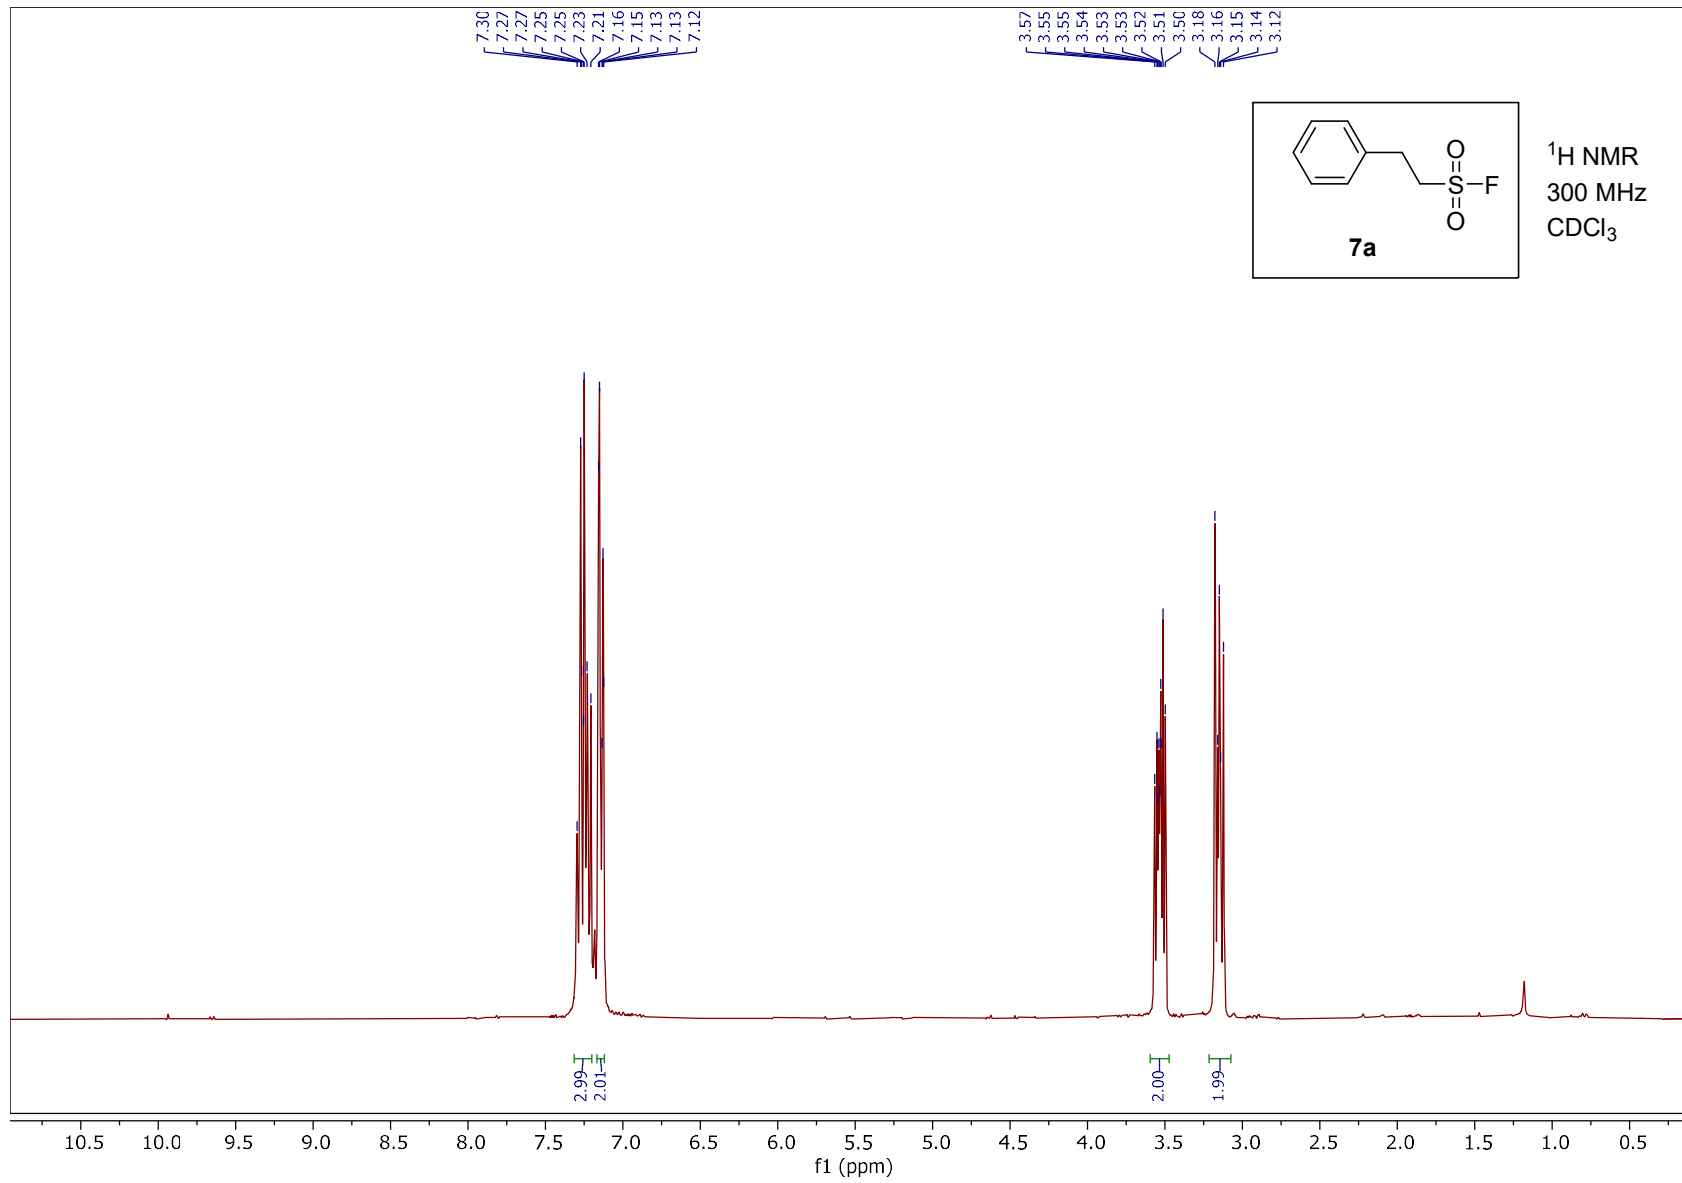

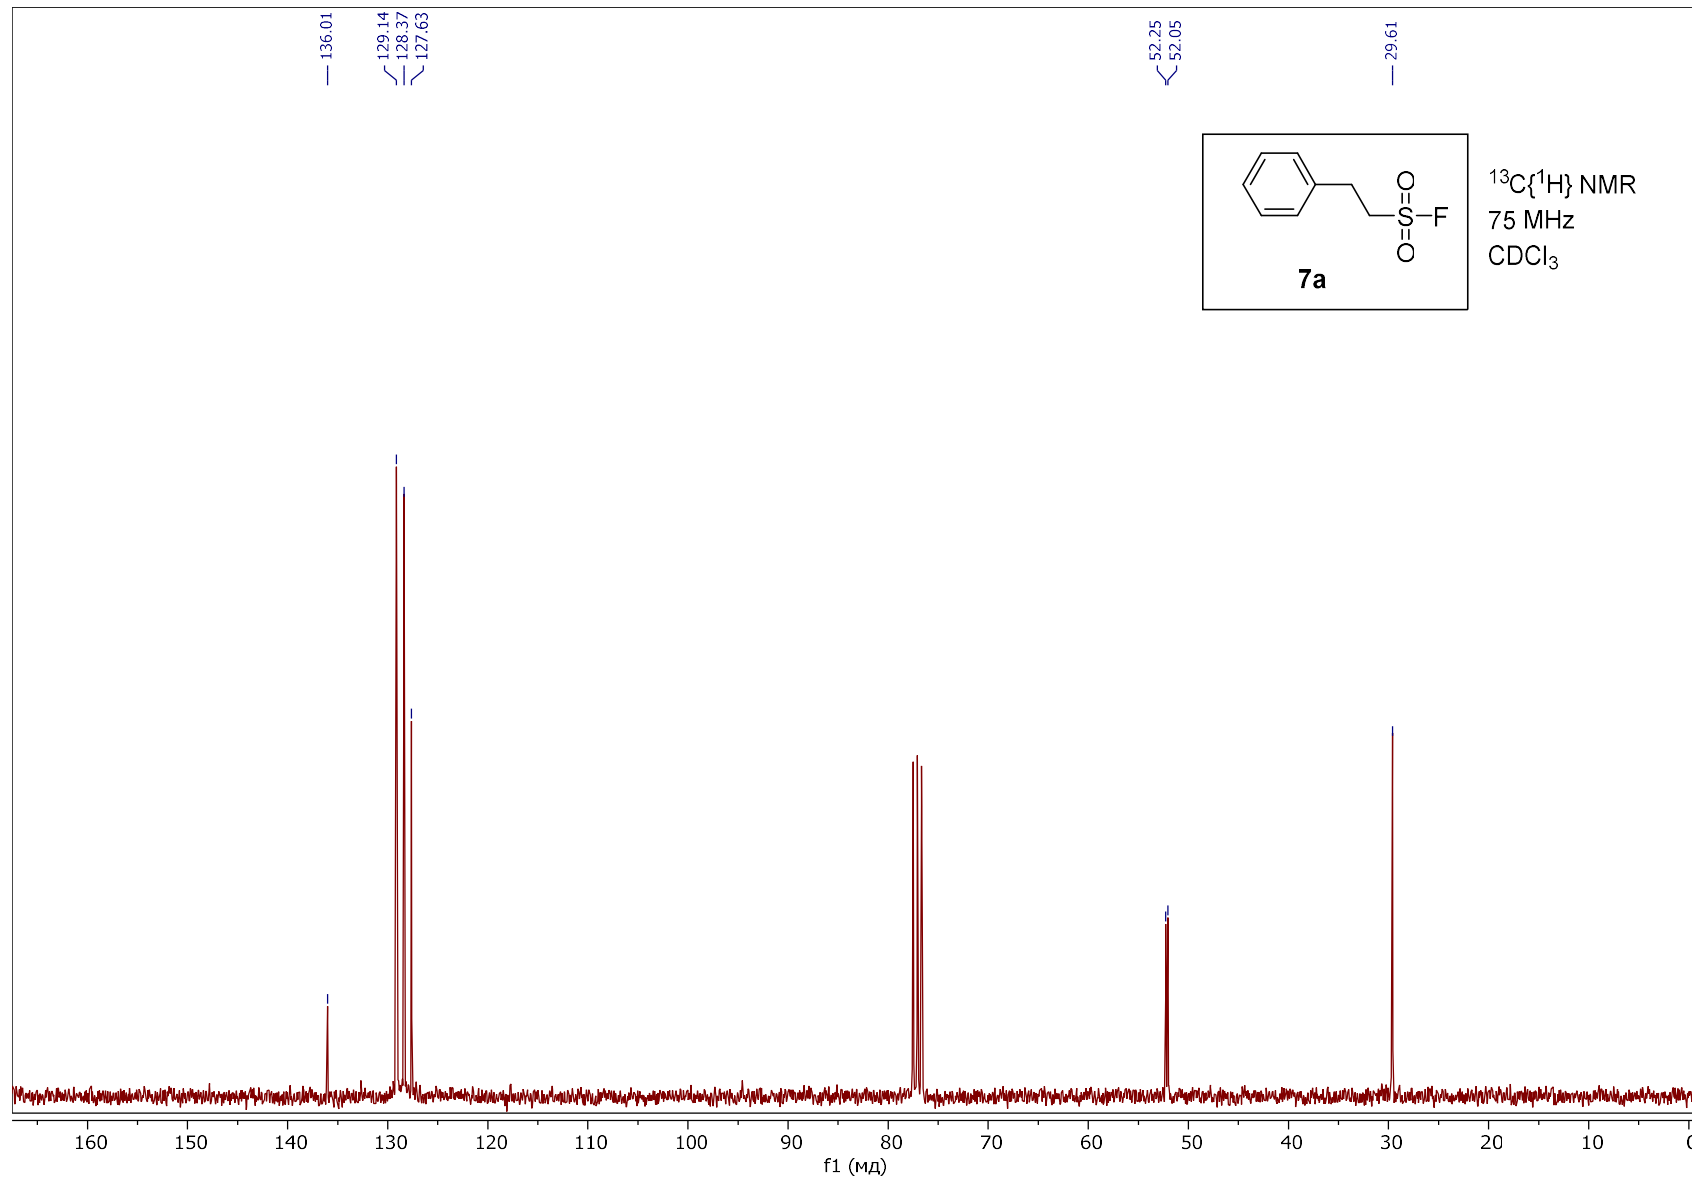

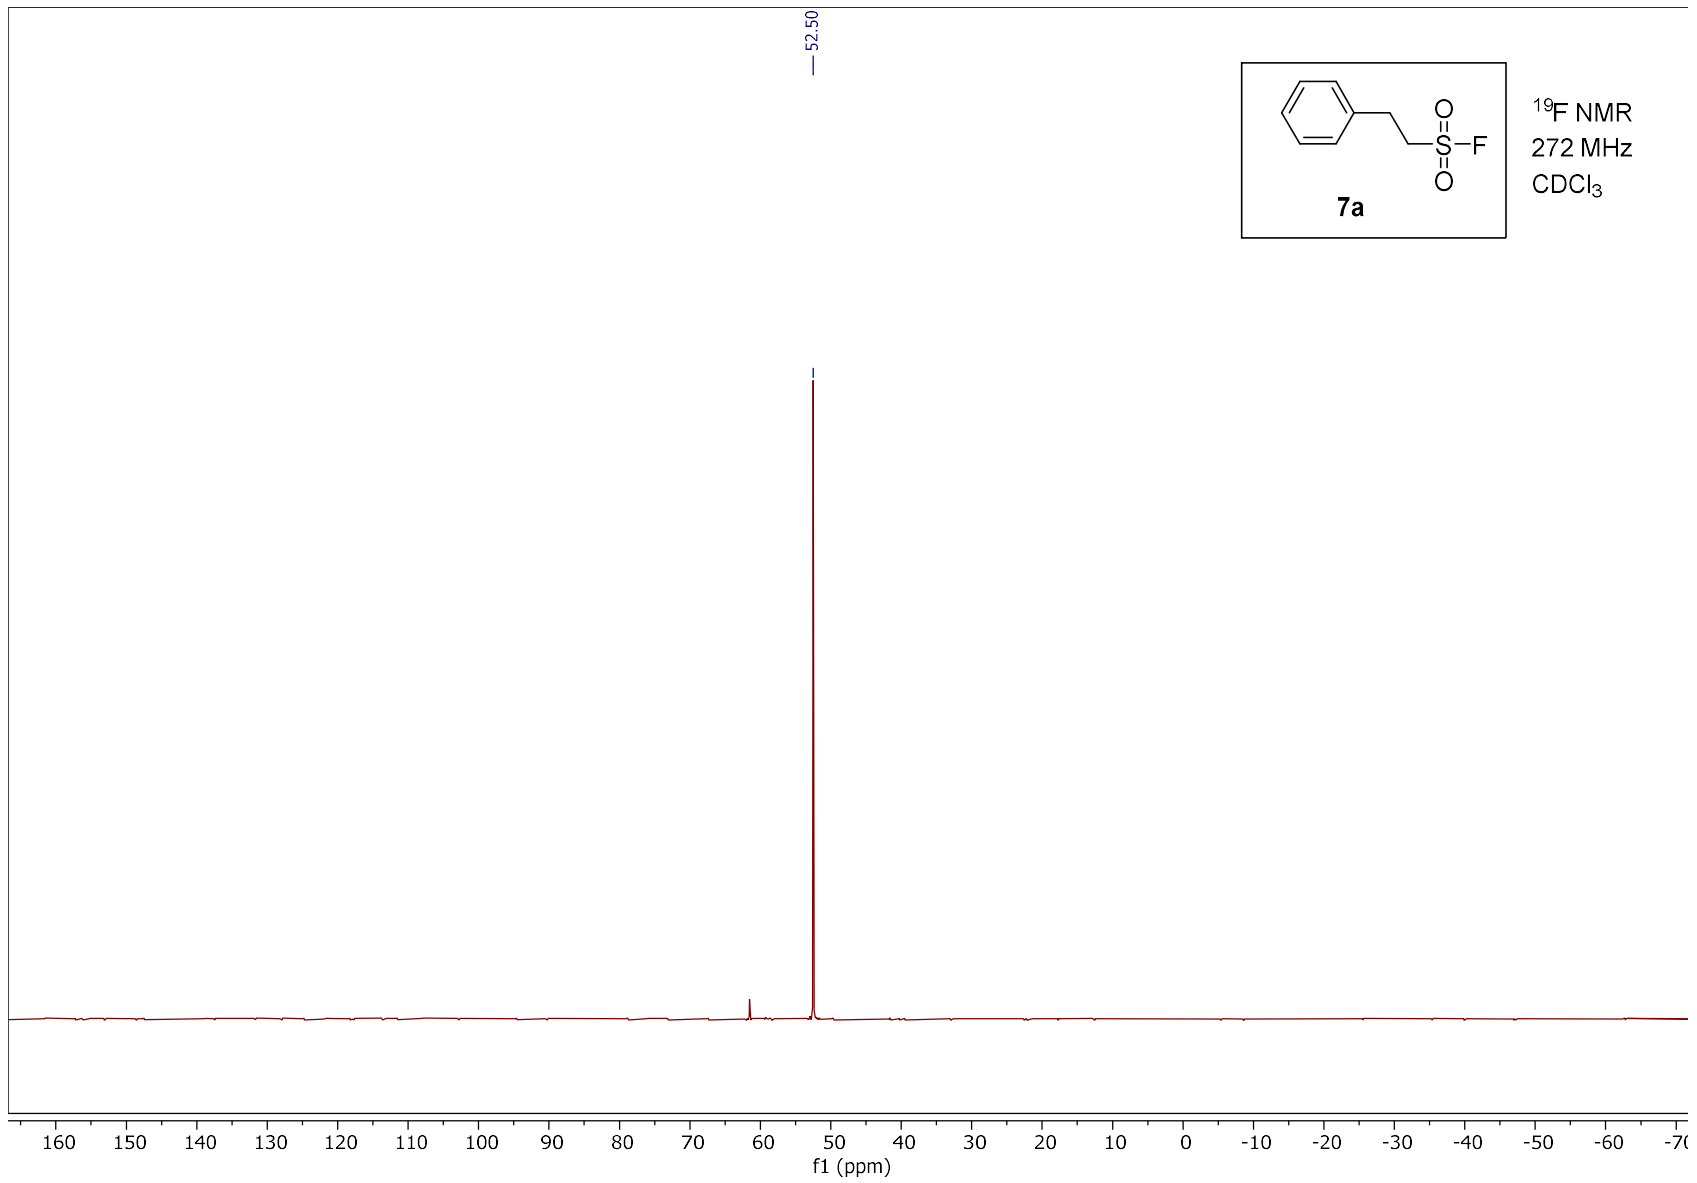

S207

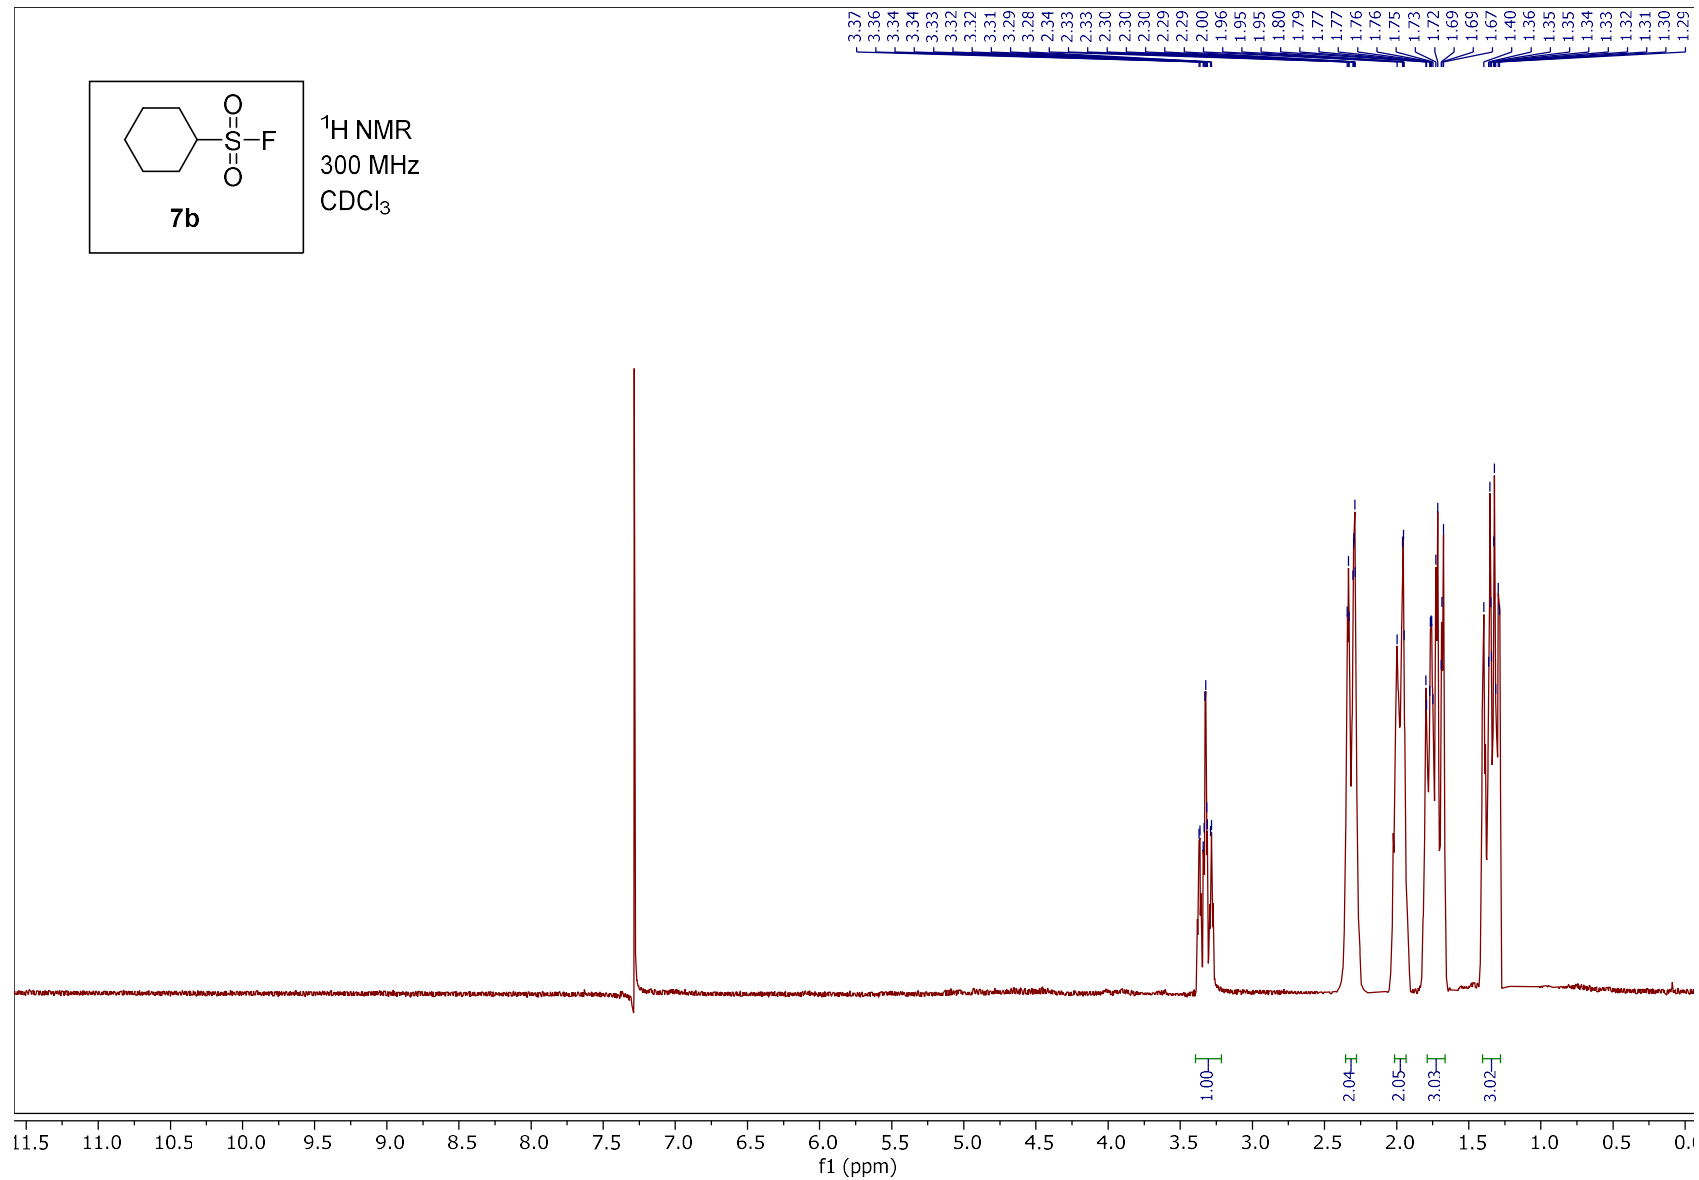



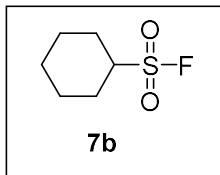

$^{13}\text{C}\{^1\text{H}\}$  NMR  
75 MHz  
 $\text{CDCl}_3$

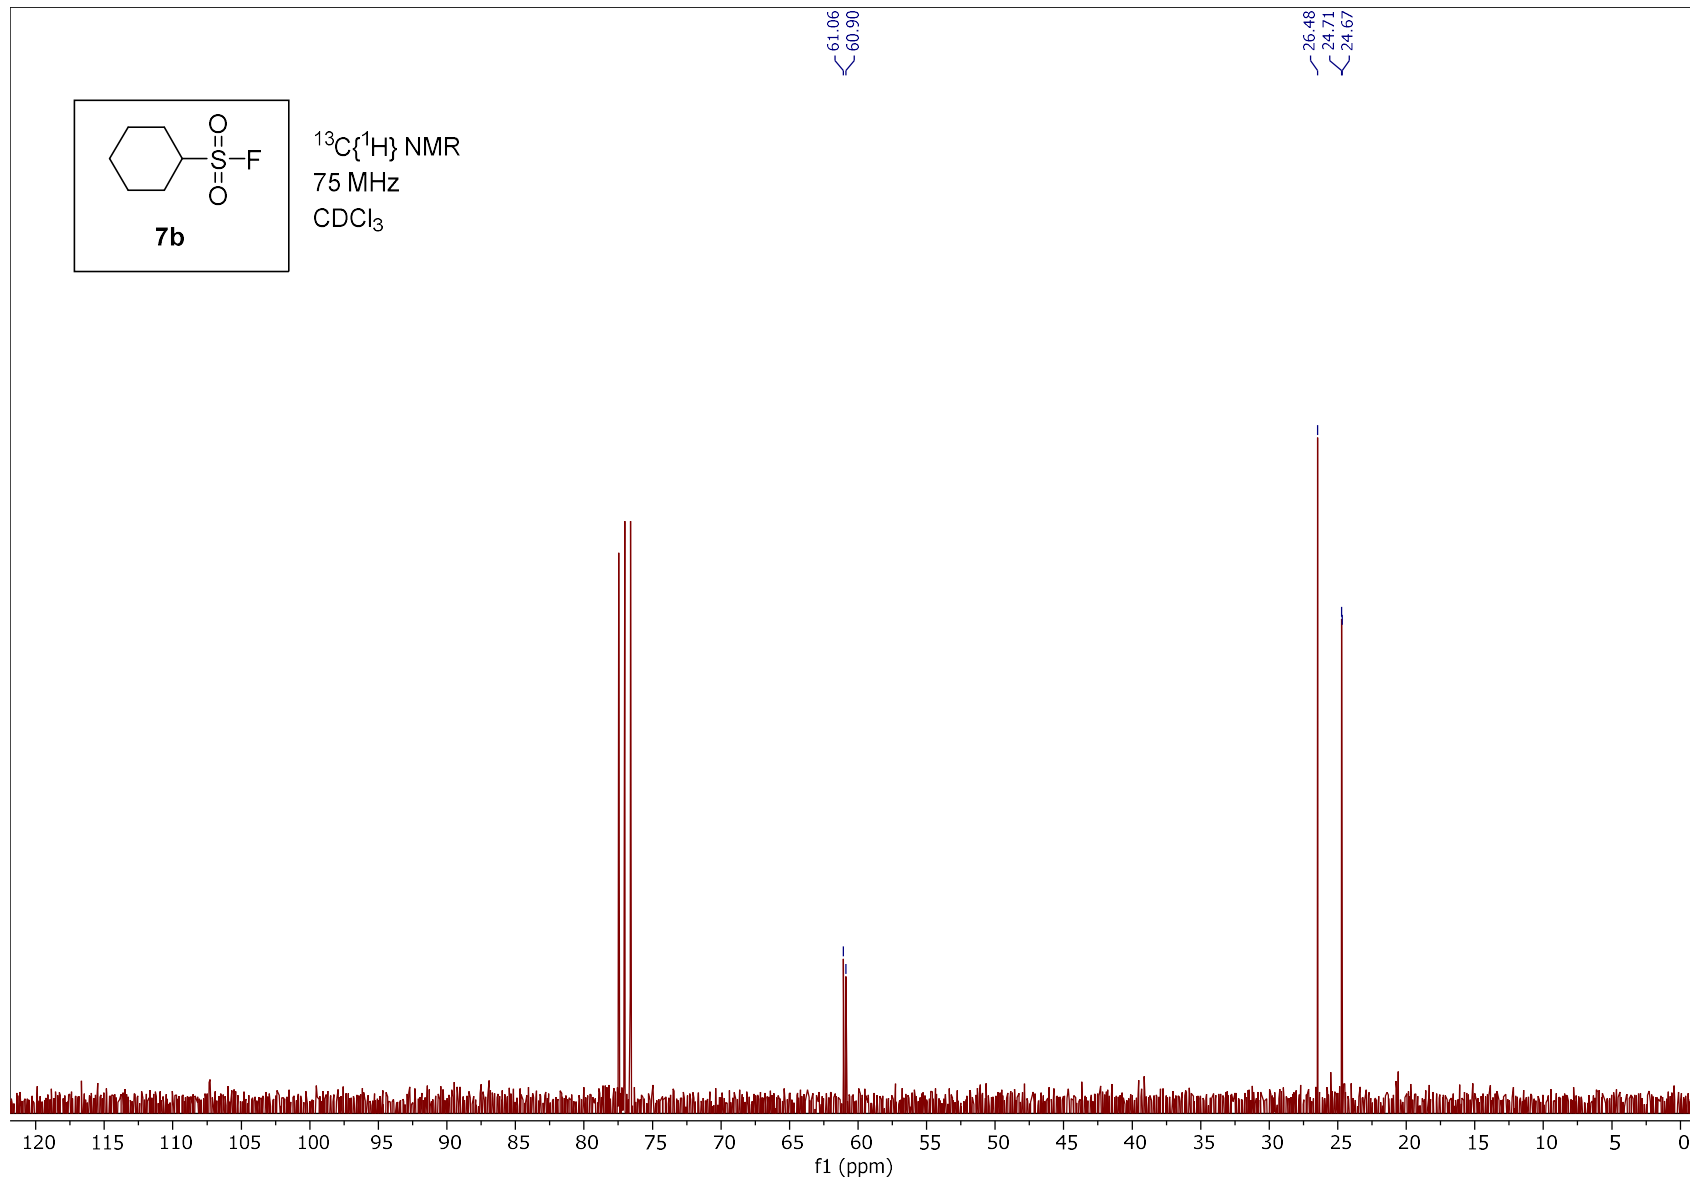

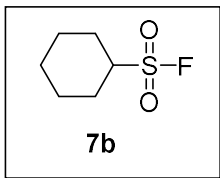

$^{19}\text{F}$  NMR  
272 MHz  
 $\text{CDCl}_3$

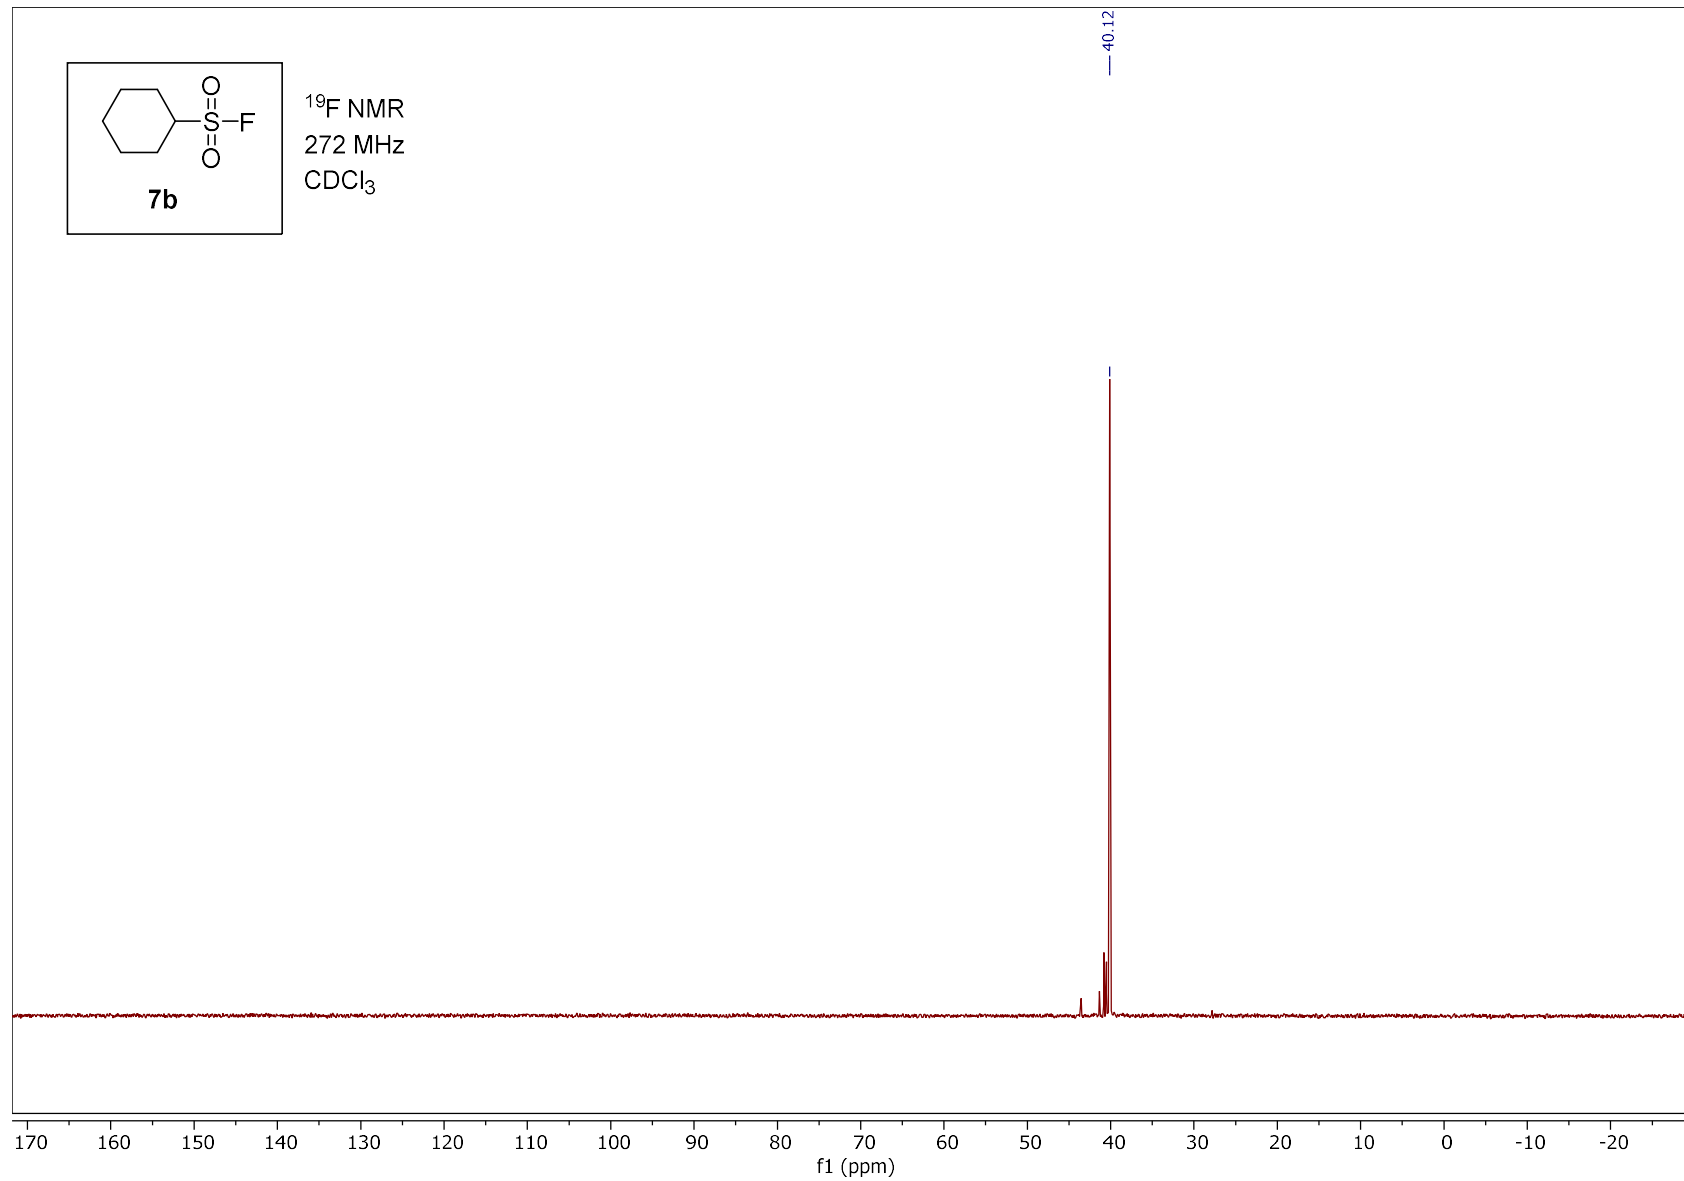

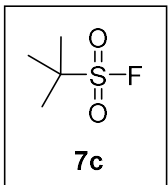

<sup>1</sup>H NMR  
300 MHz  
CDCl<sub>3</sub>

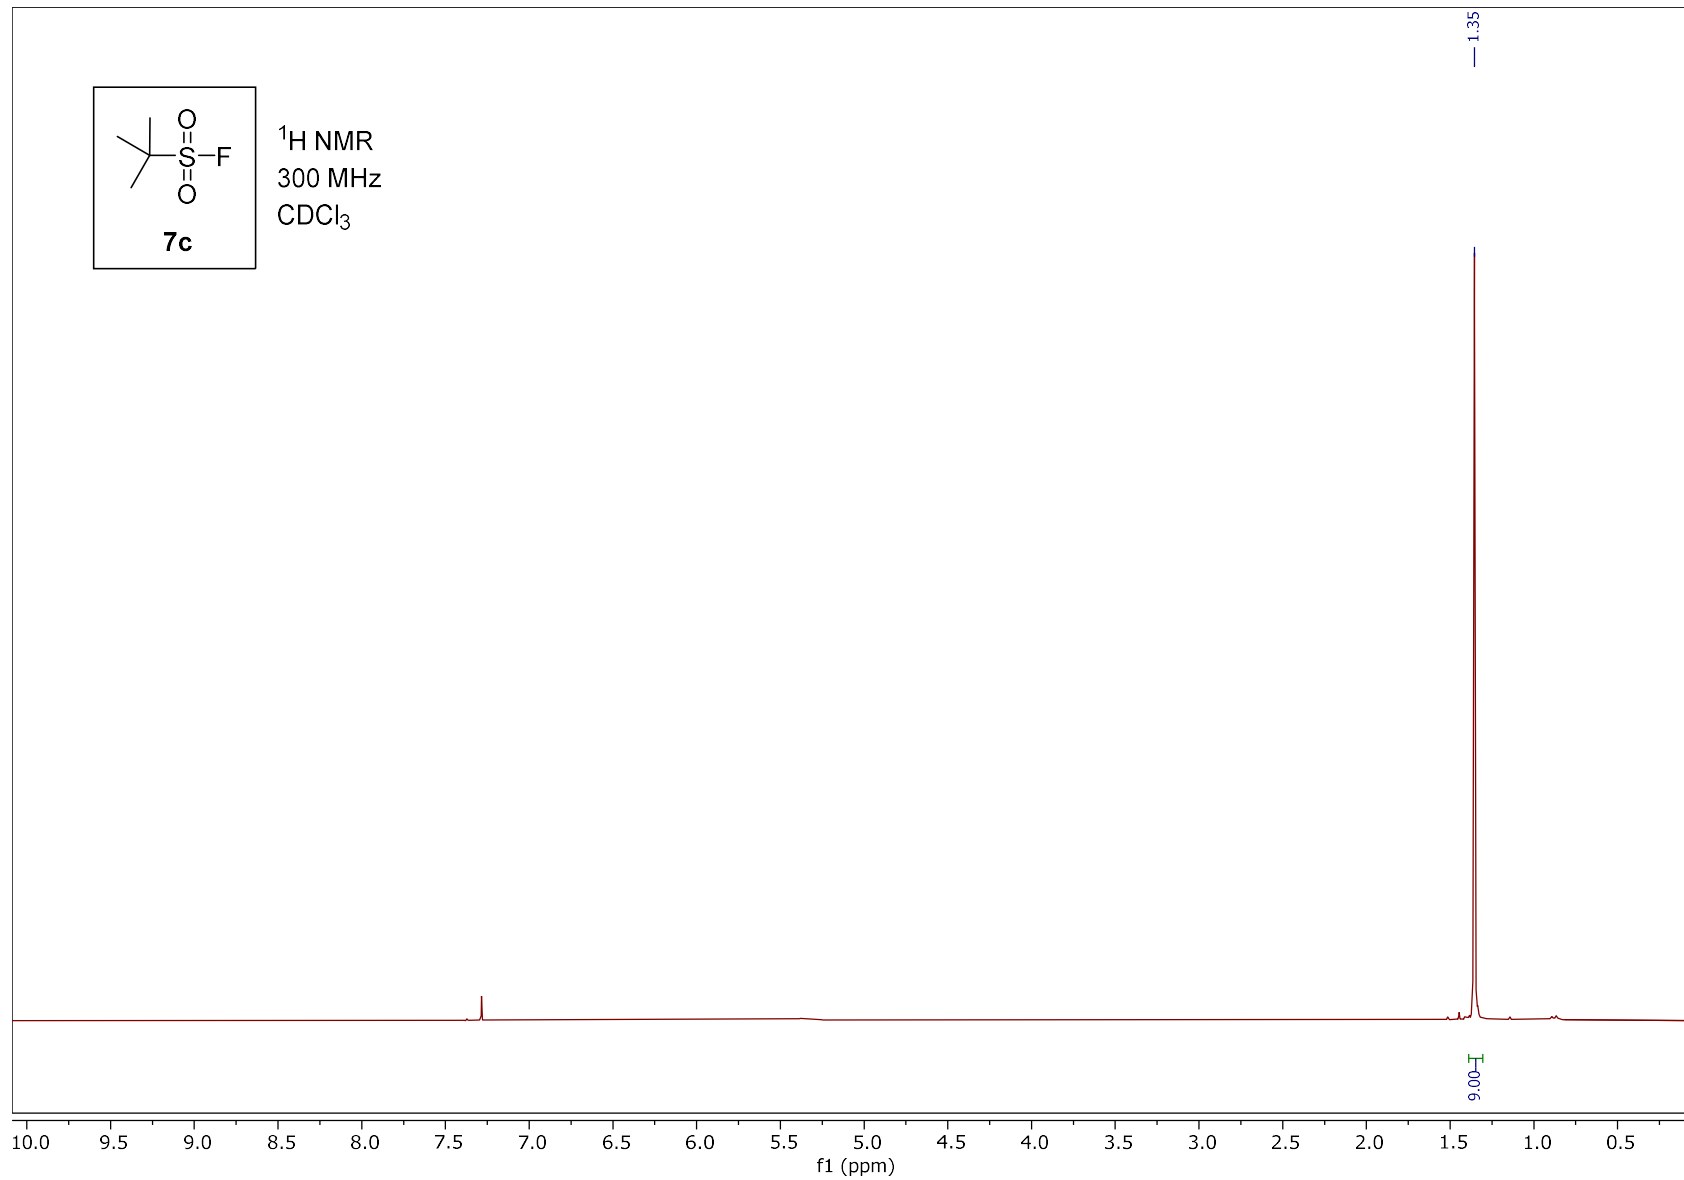

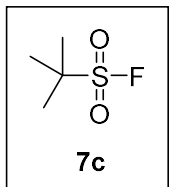

$^{13}\text{C}\{^1\text{H}\}$  NMR  
75 MHz  
 $\text{CDCl}_3$

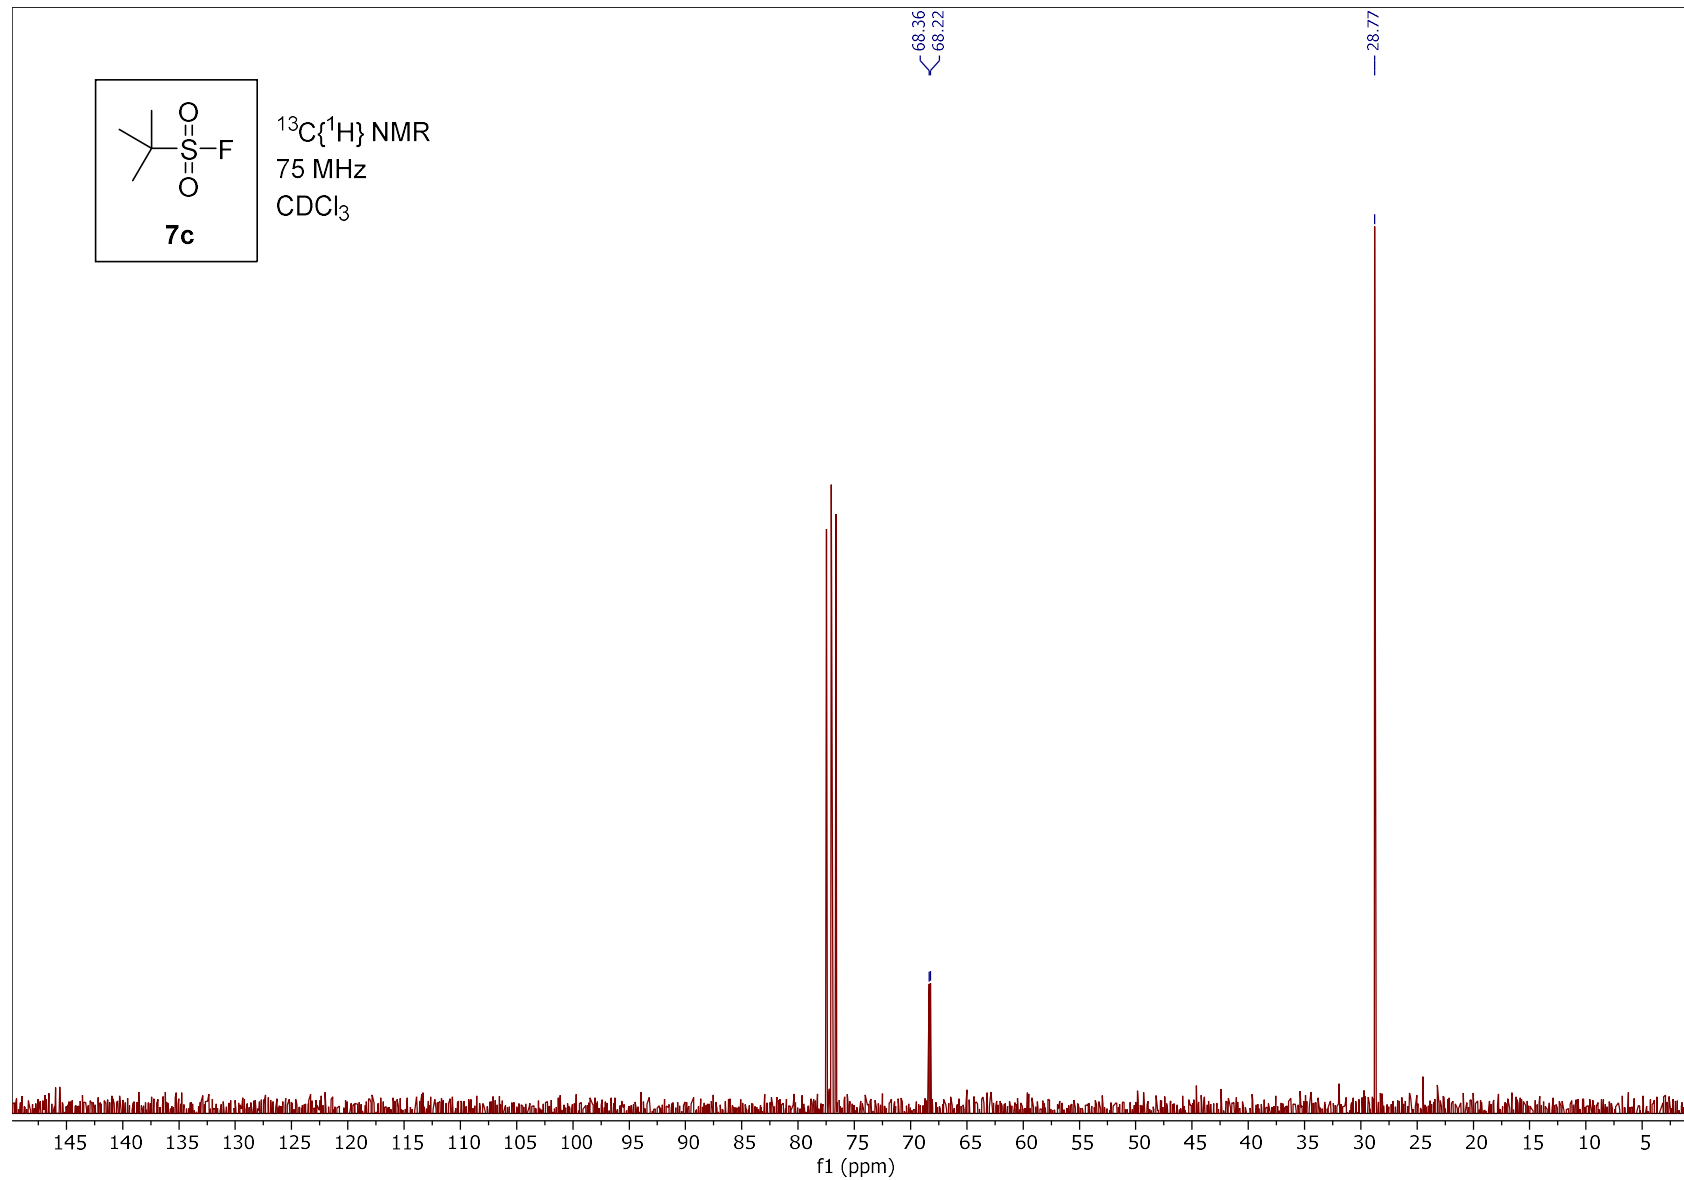

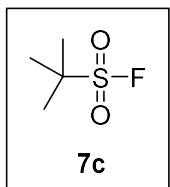

<sup>19</sup>F NMR  
272 MHz  
CDCl<sub>3</sub>

— 47.92

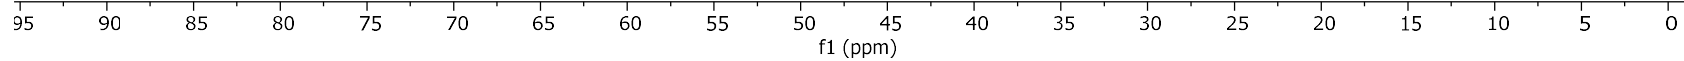

Supplement: d3sc05513b1.pdf [file d3sc05513b1.pdf]
